# Supplementary material for: Characterization of the WRKY gene family reveals its contribution to the adaptability of almond (Prunus dulcis)
Source: PeerJ. 2022 Jul 4;10:e13491. doi: 10.7717/peerj.13491 (PMC9261925; doi:10.7717/peerj.13491)
Supplement: Supplemental Information 4 [file peerj-10-13491-s004.xlsx]

## Sheet: Sheet1
Sequences of primers for qRT-PCR
Gene name	Primer name	Sequence（5'-3'）	Primer TM value (℃)	Product length (bp)
Actin	F	TCCTGAAGAGCACCCAGTTC	59.31	116
	R	TGGCAACATACATAGCAGGC	58.32
PdWRKY1	F	GCCGAGAAATCACCGACTTC	59	136
	R	GTTGTCTGAGGCTTGGGTTG	59.05
PdWRKY7a	F	GGTTCATGTACGCACCGAAG	59.28	148
	R	TTTAACTGGGCAACTTGGGG	58.29
PdWRKY10	F	CGCCACAGAAAACAGAGACC	59.13	126
	R	GTGTGGGGCAGTAAACCTTG	59.04
PdWRKY16	F	AGAACATGGAGTGGGAGCAA	58.93	104
	R	TTCTTGGGATGCAGAAGGGT	58.92
PdWRKY19	F	TGGCCATGAAGATCACCAGT	59.01	149
	R	TGTAGCAACCTCTCCGATCC	58.89
PdWRKY25	F	GTGGCAGTGTGTGATGAAGC	59.76	119
	R	TCGCTCTTAGTCAGGAAGGC	59.18
PdWRKY28a	F	TCCACTGATCCCAAAGCTGT	58.93	142
	R	GATGCTTCTCTGCCACAACC	59.19
PdWRKY39	F	ATTTGATGCCACCAAGCCAG	59.1	100
	R	TTGGTTGACGAATTGTTGGCT	58.97
PdWRKY54	F	CGAAGAAGGAAAGCGACTCG	59.01	100
	R	AGAAGGCACAGCTAGGGTTT	58.93
PdWRKY56	F	GAGGCTACTACAGGTGCAGT	58.81	148
	R	TGGGTCAAGTTAGTGGTGGA	58.19
