# Supplementary material for: Characterization of the WRKY gene family reveals its contribution to the adaptability of almond (Prunus dulcis)
Source: PeerJ. 2022 Jul 4;10:e13491. doi: 10.7717/peerj.13491 (PMC9261925; doi:10.7717/peerj.13491)
Supplement: Supplemental Information 5 [file peerj-10-13491-s005.xlsx]

## Sheet: Sheet1
Quantitative expression of gene fluorescence
Low temperature stress				Drought stress				Salt stress
Sample	PdWRKY39	2^-△△ct Std.Dev		Sample	PdWRKY39	2^-△△ct Std.Dev		Sample	PdWRKY39	2^-△△ct Std.Dev
CK	1.0001	0.0171255		CK	1.0001	0.0171255		CK	1.0001	0.0171255
6h	177.137	1.97559		6h	1.76584	0.104652		6h	0.265843	0.0210652
12h	93.1018	4.22847		12h	15.1636	0.453648		12h	2.63626	0.123565
24h	0.822413	0.0616199		24h	3.00205	0.211067		24h	0.0126516	0.00119157
Sample	PdWRKY25	2^-△△ct Std.Dev		Sample	PdWRKY25	2^-△△ct Std.Dev		Sample	PdWRKY25	2^-△△ct Std.Dev
CK	1.00044	0.0363996		CK	1.00044	0.0363996		CK	1.00044	0.0363996
6h	1.04236	0.023263		6h	0.365751	0.0165131		6h	0.765751	0.0165135
12h	9.83869	0.306785		12h	0.645225	0.0265235		12h	1.64522	0.0325455
24h	4.57425	0.304649		24h	0.135135	0.00352345		24h	0.435135	0.0435235
Sample	PdWRKY7a	2^-△△ct Std.Dev		Sample	PdWRKY7a	2^-△△ct Std.Dev		Sample	PdWRKY7a	2^-△△ct Std.Dev
CK	1.00183	0.0746202		CK	1.00183	0.0746202		CK	1.00183	0.0746202
6h	21.1214	0.84039		6h	1.57676	0.0755455		6h	0.452544	0.0127442
12h	1.86013	0.096808		12h	2.47864	0.125757		12h	1.86013	0.0524242
24h	0.272533	0.0476336		24h	0.734597	0.0137598		24h	0.272533	0.0257242
Sample	PdWRKY1	2^-△△ct Std.Dev		Sample	PdWRKY1	2^-△△ct Std.Dev		Sample	PdWRKY1	2^-△△ct Std.Dev
CK	1.00191	0.0747169		CK	1.00191	0.0747169		CK	1.00191	0.0747169
6h	46.4763	2.08782		6h	37.1527	1.84244		6h	3.45438	0.156753
12h	12.9621	0.877885		12h	17.5245	0.973756		12h	15.2455	0.652453
24h	16.7701	1.41781		24h	0.524525	0.0378112		24h	0.0754554	0.00572728
Sample	PdWRKY16	2^-△△ct Std.Dev		Sample	PdWRKY16	2^-△△ct Std.Dev		Sample	PdWRKY16	2^-△△ct Std.Dev
CK	1.0002	0.0281753		CK	1.0002	0.0281753		CK	1.0002	0.0281753
6h	65.152	2.16318		6h	1.54542	0.0778575		6h	0.524276	0.0142543
12h	37.6605	1.59883		12h	0.537576	0.0478587		12h	1.56788	0.0575424
24h	11.8382	0.700457		24h	0.253454	0.0345273		24h	0.0382354	0.0174558
Sample	PdWRKY28a	2^-△△ct Std.Dev		Sample	PdWRKY28a	2^-△△ct Std.Dev		Sample	PdWRKY28a	2^-△△ct Std.Dev
CK	1.00107	0.0560018		CK	1.00107	0.0560018		CK	1.00107	0.0560018
6h	0.382596	0.0601623		6h	1.57676	0.0487579		6h	3.75272	0.0801455
12h	0.605187	0.0542312		12h	0.357273	0.0762896		12h	7.47857	0.145784
24h	0.194145	0.0355277		24h	0.775275	0.0267527		24h	0.754354	0.0357248
Sample	PdWRKY10	2^-△△ct Std.Dev		Sample	PdWRKY10	2^-△△ct Std.Dev		Sample	PdWRKY10	2^-△△ct Std.Dev
CK	1.00046	0.0372849		CK	1.00046	0.0372849		CK	1.00046	0.0372849
6h	4.38356	0.0760506		6h	0.652421	0.0457248		6h	0.457243	0.0457247
12h	6.37632	0.170666		12h	0.852408	0.0147866		12h	8.37632	0.357242
24h	1.02261	0.0235329		24h	0.347573	0.0424575		24h	0.142105	0.0213752
Sample	PdWRKY54	2^-△△ct Std.Dev		Sample	PdWRKY54	2^-△△ct Std.Dev		Sample	PdWRKY54	2^-△△ct Std.Dev
CK	1.0003	0.0297514		CK	1.0003	0.0297514		CK	1.0003	0.0297514
6h	2.66808	0.0639281		6h	27.4534	1.54243		6h	0.524245	0.0285743
12h	0.910878	0.0343844		12h	46.4254	2.54354		12h	6.20421	0.254238
24h	5.48098	0.190668		24h	12.4783	0.756724		24h	5.48098	0.290668
Sample	PdWRKY56	2^-△△ct Std.Dev		Sample	PdWRKY56	2^-△△ct Std.Dev		Sample	PdWRKY56	2^-△△ct Std.Dev
CK	1.00066	0.0741956		CK	1.00066	0.0441956		CK	1.00066	0.0441956
6h	0.968711	0.0343959		6h	0.787524	0.0442424		6h	0.954524	0.0554228
12h	0.703454	0.0248597		12h	0.457528	0.0175724		12h	0.552543	0.0142413
24h	0.414784	0.0465955		24h	0.255425	0.0342425		24h	0.172428	0.0254256
Sample	PdWRKY19	2^-△△ct Std.Dev		Sample	PdWRKY19	2^-△△ct Std.Dev		Sample	PdWRKY19	2^-△△ct Std.Dev
CK	1.00034	0.0317051		CK	1.00034	0.0317051		CK	1.00034	0.0317051
6h	1.59048	0.343734		6h	14.7852	0.578634		6h	10.5345	0.597345
12h	0.788206	0.0667871		12h	27.5374	1.03574		12h	13.4535	0.756776
24h	0.215649	0.0488054		24h	5.24225	0.535437		24h	2.53654	0.225727
