# Supplementary material for: Characterization of the WRKY gene family reveals its contribution to the adaptability of almond (Prunus dulcis)
Source: PeerJ. 2022 Jul 4;10:e13491. doi: 10.7717/peerj.13491 (PMC9261925; doi:10.7717/peerj.13491)
Supplement: Supplemental Information 6 — The sequences of WRKY proteins in almond [file peerj-10-13491-s006.xlsx]

## Sheet: Sheet1
Characteristics of WRKY gene family members in almond genome													The sequences of WRKY proteins in almond
Serial number	Gene name	mRNA ID	Protein ID	Protein length (aa)	Molecular weight (KDa)	Isoelectric point	Grand average of hydropathicity	Subcellular localization	Conserved motif	Zinc finger	Homologous AtWRKY		>Prudul26A001568P1
1	PdWRKY1	Prudul26A015786C1	Prudul26A015786P1	281	30.64	9.95	-0.579	Nucleus	WRKYGQK	C2H2	AtWRKY11		MNPGLDFKIHEAAQSSLKHAHHLFGCVSENKQKRSVQEVSLIAQDAVEEFRKLLALLDGS
2	PdWRKY2	Prudul26A020687C1	Prudul26A020687P1	390	42.91	5.82	-0.865	Nucleus	WRKYGQK	C2H2	AtWRKY48		LLSNQKRIRRGPLPKSHDINQVELLDSPNPSSQNTTHNWPQPHPQPQPQNCLVRQFFSAV
3	PdWRKY3	Prudul26A007596C1	Prudul26A007596P1	185	20.94	9.58	-0.869	Nucleus	WRKYGQK	C2H2	AtWRKY75		HQSDQATANVIHSNSFSMGREKKPNPALQQGQSEAGVVLPNNLIMGLNQFSQKPTSTSLI
4	PdWRKY4	Prudul26A028617C1	Prudul26A028617P1	636	69.62	6.63	-0.867	Nucleus	WRKYGQK	C2H2	AtWRKY72		SMDGSSLNTRMIQYSSSELLASRDCTSMFSSKTKCGAKSEEVTPRCLVSAGGCHCSKRRK
5	PdWRKY5	Prudul26A005095C1	Prudul26A005095P1	517	56.21	6.74	-0.933	Nucleus	WRKYGQK	C2H2	AtWRKY3		LRIKRRIRVPALSNKLADIPPDDYTWRKYGQKPIKGSPYPRSYYKCSSVRGCPARKHVER
6	PdWRKY6	Prudul26A007647C1	Prudul26A007647P1	330	36.32	5.89	-0.855	Nucleus	WRKYGQK	C2H2	AtWRKY57		CLEDPTMLVVTYEGDHQHPKITFQAPTLAI
7	PdWRKY7a	Prudul26A013051C1	Prudul26A013051P1	327	36.57	6.76	-0.757	Nucleus	WRKYGQK	C2H2	AtWRKY18		>Prudul26A001657P1
8	PdWRKY7b	Prudul26A013051C2	Prudul26A013051P2	283	31.76	8.63	-0.763	Nucleus	WRKYGQK	C2H2	AtWRKY40		MISTCSLVTKLCVKKAFTTFLVAKLMSNSNNFRAQESPENDFSEQSNFEFSEYLMIGEWL
9	PdWRKY8	Prudul26A006215C1	Prudul26A006215P1	271	30.25	9.23	-0.731	Nucleus	WRKYGQK	C2H2	AtWRKY40		DEDHPTSMALETVQNSGYRANEVDESRGSSSQLGGSNSRENESGSVQERQEVRERVAFKT
10	PdWRKY9	Prudul26A001657C1	Prudul26A001657P1	187	21.46	6.01	-0.611	Nucleus	WRKYGKK	C2H2	AtWRKY50		KSEVEILDDGFKWRKYGKKMVKNSPNPRNYYKCSVEGCPVKKRVERDRDDPRFVITTYEG
11	PdWRKY10	Prudul26A027240C1	Prudul26A027240P1	365	39.84	9.41	-0.626	Nucleus	WRKYGQK	C2H2	AtWRKY7		VHNHLSL
12	PdWRKY11a	Prudul26A024381C1	Prudul26A024381P1	294	31.94	9.71	-0.639	Nucleus	WRKYGQK	-	AtWRKY17		>Prudul26A001748P1
13	PdWRKY11b	Prudul26A024381C2	Prudul26A024381P2	342	37.25	9.48	-0.633	Nucleus	WRKYGQK	C2H2	AtWRKY17		MESAARDHSIHNCRSIEQPLLSPETAVDHDHHGKRIVDELDFFADNKGRLMEMRDQTVEV
14	PdWRKY12	Prudul26A015240C1	Prudul26A015240P1	559	61.79	5.04	-0.932	Nucleus	WRKYGQK	C2H2	AtWRKY9		KEEGAHDHHGVGQEKQLPDVNTGLNLLTTYTSSDKSSMDDGTSSSHNMEDKHRTNELAVL
15	PdWRKY13	Prudul26A013566C1	Prudul26A013566P1	475	53.56	10.03	-0.532	Nucleus	WRKYGQK	C2	AtWRKY12		QAELGRMSVENQRLRVMISQVNNNYQALQVQIVTLMQRQQNQKADHQTPEQHKMINNGSV
16	PdWRKY14	Prudul26A031546C1	Prudul26A031546P1	357	39.18	7.16	-0.806	Nucleus	WRKYGQK	C2H2	AtWRKY22		VVEEKQMMNGFNHIVPRQFMDMGRAEKDELSQCSLEGCRSQDCSGSPPRNDIVESMECGK
17	PdWRKY15	Prudul26A020675C1	Prudul26A020675P1	221	24.74	9.24	-0.764	Nucleus	WRKYGQK	C2H2	AtWRKY43		STSHVLHRDLSGRISTTNGGEDSPDQEFQGWVPKKVSKMMSPRDVDQASSETMSMIKKAR
18	PdWRKY16	Prudul26A001975C1	Prudul26A001975P1	358	39.69	5.16	-0.595	Nucleus	WRKYGQK	C2HC	AtWRKY52		VSVRARSEASMISDGCQWRKYGQKMAKGNPCPRAYYRCTMGTGCPVRKQVQRCAEDRTIL
19	PdWRKY17	Prudul26A022804C1	Prudul26A022804P1	208	23.84	8.91	-0.892	Nucleus	WRKYGQK	C2H2	AtWRKY43		VTTYEGHHNHPLPPAAMAMASTTSAAASMLLSGSMPSADGLISSNSFLARSALPNCPPSL
20	PdWRKY18	Prudul26A017436C1	Prudul26A017436P1	397	43.93	7.24	-0.692	Nucleus	WRKYGQK	C2HC	AtWRKY55		ATLSASAPFPTVTLDLTRTPTSSEMPLGQPNQLPPSSFPQNMMSMPQILGQALSSQSKFS
21	PdWRKY19	Prudul26A012059C1	Prudul26A012059P1	325	36.54	5.69	-0.849	Nucleus	WRKYGQK	C2HC	AtWRKY70		VLDSFQGLDSATHSLADKVNAATAAITADPNFTAALVAAITSIVGNVHSNNNTNNNVTTR
22	PdWRKY20	Prudul26A019680C1	Prudul26A019680P1	392	43.69	5.07	-0.845	Nucleus	WRKYGQK	C2H2	AtWRKY27		NNSDSNT
23	PdWRKY21	Prudul26A006177C1	Prudul26A006177P1	615	66.89	6.44	-0.579	Nucleus	WRKYGQK	C2H2	AtWRKY47		>Prudul26A001975P1
24	PdWRKY22	Prudul26A031374C1	Prudul26A031374P1	321	35.63	6.75	-0.748	Nucleus	WRKYGQK	C2H2	AtWRKY23		MEKRKNMEWEQKTLTSELTQGKELAKQLMNYLHPSASQEKRDFLISKILFSYEKALSLLK
25	PdWRKY23	Prudul26A032520C1	Prudul26A032520P1	322	35.53	8.72	-0.761	Nucleus	WRKYGQK	C2H2	AtWRKY40		RDVGSDGESNHIPNTMLESPTSFGNGSPMSEISDQDCKNKNVFKKRKTMPRWTEEVKVFS
26	PdWRKY24	Prudul26A005971C1	Prudul26A005971P1	268	29.26	5.36	-0.721	Nucleus	WRKYGQK	C2H2	AtWRKY69		GTGLDGSLDDGYSWRKYGQKDILGATYPRGYYRCTHRGTQGCLATKQVQKADADPSTMVV
27	PdWRKY25	Prudul26A022742C1	Prudul26A022742P1	366	41.48	6.94	-1.096	Nucleus	WRKYGQK	C2H2	AtWRKY28		TYRGEHTCSQVLQLARSSALSLAKQASTGNQNATREAEKPKASQEMSFGFGAGLRVKTED
28	PdWRKY26	Prudul26A029053C1	Prudul26A029053P1	486	52.78	6.19	-0.894	Nucleus	WRKYGQK	C2H2	AtWRKY1		LDTREDDIFPSFSFPSTLIEPENVGDHIFCATLMDGYSPAFASPAATFEPDYLQAVSPCQ
29	PdWRKY27	Prudul26A028388C1	Prudul26A028388P1	649	70.63	6.29	-0.781	Nucleus	WRKYGQK	C2H2	AtWRKY6		MSSFGLGLDYVQTSESGLSEIISAPTSVTNSPIGDFGFSLDDLDFHHFENPESFAYES
30	PdWRKY28a	Prudul26A005633C1	Prudul26A005633P1	533	58.19	7.76	-0.901	Nucleus	WRKYGQK	C2H2	AtWRKY4		>Prudul26A002073P1
31	PdWRKY28b	Prudul26A005633C2	Prudul26A005633P2	467	50.96	6.08	-0.849	Nucleus	WRKYGQK	C2H2	AtWRKY4		MEWSWPESVLSNGERVKEELMQGRELAGQLCRVFDDHKSTLVSGFGGGGGSAEDLVDKIL
32	PdWRKY29	Prudul26A021325C1	Prudul26A021325P1	503	55.11	6.87	-0.674	Nucleus	WRKYGQK	C2H2	AtWRKY72		GSFANTLLILNGNESDGEIVSGNQIQGISSGGGSADSSSWDANHTAAVIKSEDFYEESCK
33	PdWRKY30	Prudul26A030807C1	Prudul26A030807P1	223	25.48	8.97	-0.941	Nucleus	WRKYGQK	C2H2	AtWRKY75		STSTFKDRRGSYKRRKTSHSWTSDTHALTDDGHGWRKYGQKRILNSKHSRNYYRCTHKFE
34	PdWRKY31a	Prudul26A017718C1	Prudul26A017718P1	617	67.07	6.84	-0.767	Nucleus	WRKYGQK	C2H2	AtWRKY6		QSCKATKHVQQIQDHPPMFRTTYHGNHTCRDYLKASELLLDCTSPRESSNFIKFGDTKQD
35	PdWRKY31b	Prudul26A017718C2	Prudul26A017718P2	583	63.44	7.72	-0.756	Nucleus	WRKYGQK	C2H2	AtWRKY6		HPFFSFFTSVKKEELVFKEESIIKDEIPPTSDDRVMTSHDNYSWLCDYLVSPDLTTFESS
36	PdWRKY32	Prudul26A012168C1	Prudul26A012168P1	283	30.93	5.56	-0.899	Nucleus	WRKYGQK	C2H2	AtWRKY65		GPPSGVSSTLHEFDHEDVISRLMMGSFDLDELLQYI
37	PdWRKY33	Prudul26A030043C1	Prudul26A030043P1	342	37.85	6.57	-0.942	Nucleus	WRKYGQK	C2H2	AtWRKY28		>Prudul26A004090P1
38	PdWRKY34	Prudul26A030482C1	Prudul26A030482P1	523	56.61	6.01	-0.701	Nucleus	WRKYGQK	C2H2	AtWRKY14		MTSSFTHLLTSNMNNMDSNIDQERTNWGLSDYASGSLMDRNGNEIPKFKSLQPPSLPMSP
39	PdWRKY35	Prudul26A001748C1	Prudul26A001748P1	547	59.79	6.13	-0.607	Nucleus	WRKYGQK	C2H2	AtWRKY6		PPVSPSSYLASTPAFSPTDFFSSPMFLSSSNTLQSPTSGAFSSQIFDWMSNSKETQQGME
40	PdWRKY36	Prudul26A027932C1	Prudul26A027932P1	586	64.05	5.96	-0.812	Nucleus	WRKYGQK	C2H2	AtWRKY20		REQKMFSDFSFQPETRPAATSSSSFNIQASSNMASEESLKTEQKPWDFNRISRQADSLTE
41	PdWRKY37	Prudul26A001568C1	Prudul26A001568P1	330	36.86	9.57	-0.642	Nucleus	WRKYGQK	C2H2	AtWRKY21		KTGVKSEFEPLQIIFPEIGTNQTNMQSNGPSGAPKPDTIHCTQSSQFVREQKSDDGFNWR
42	PdWRKY38a	Prudul26A023323C1	Prudul26A023323P1	314	35.38	4.99	-0.566	Nucleus	WRKYGQK	C2H2	AtWRKY29		KYGQKQVKGSENPRSYYKCTYPNCPTKKKVERSLDGHITQIVYKGSHNHPKPQSTRRSTS
43	PdWRKY38b	Prudul26A023323C2	Prudul26A023323P2	292	32.96	5.15	-0.579	Nucleus	WRKYGQK	C2H2	AtWRKY29		QSIQGSSYGISDQSVPTISNPKIESVTMQEDSSASIGEDEFEQNSPISNSGGGEDENEPE
44	PdWRKY39	Prudul26A023213C1	Prudul26A023213P1	356	39.93	5.41	-0.702	Nucleus	WRKYGQK	C2HC	AtWRKY52		AKRWKGENANDQPFSAPGSRIVKEPRIVVQTTSEIDILDDGYRWRKYGQKVVKGNPNPRS
45	PdWRKY40	Prudul26A014175C1	Prudul26A014175P1	170	19.55	9.42	-0.946	Nucleus	WRKYGQK	C2H2	AtWRKY75		YYKCTSVGCPVRKHVERASHDTRAVITTYEGKHNHDVPAARGSGSYSNANRPASDNGSNN
46	PdWRKY41	Prudul26A019298C1	Prudul26A019298P1	683	73.47	7.62	-0.826	Nucleus	WRKYGQK	C2H2	AtWRKY72		NSNVSMAVRPLALPNHSNLSYLNSLQNTRQPTTERQSPYTLKMLQSEGSYGFPEF
47	PdWRKY42	Prudul26A021799C1	Prudul26A021799P1	748	80.85	5.82	-0.775	Nucleus	WRKYGQK	C2H2	AtWRKY2		>Prudul26A004090P2
48	PdWRKY43	Prudul26A028352C1	Prudul26A028352P1	590	64.65	6.74	-0.946	Nucleus	WRKYGQK	C2H2	AtWRKY33		MTSSFTHLLTSNMNNMDSNIDQERTNWGLSDYASGSLMDRNGNEIPKFKSLQPPSLPMSP
49	PdWRKY44	Prudul26A018032C1	Prudul26A018032P1	196	22.09	6.51	-1.038	Nucleus	WRKYGKK	C2H2	AtWRKY51		PPVSPSSYLASTPAFSPTDFFSSPMFLSSSNTLQSPTSGAFSSQIFDWMSNSKETQQGME
50	PdWRKY45	Prudul26A012395C1	Prudul26A012395P1	325	35.56	9.62	-0.543	Nucleus	WRKYGQK	C2H2	AtWRKY7		REQKMFSDFSFQPETRPAATSSSSFNIQASSNMASVEESLKTEQKPWDFNRISRQADSLT
51	PdWRKY46	Prudul26A031132C1	Prudul26A031132P1	475	51.81	8.84	-0.922	Nucleus	WRKYGQK	C2H2	AtWRKY44		EKTGVKSEFEPLQIIFPEIGTNQTNMQSNGPSGAPKPDTIHCTQSSQFVREQKSDDGFNW
52	PdWRKY47	Prudul26A027479C1	Prudul26A027479P1	297	33.22	5.09	-0.848	Nucleus	WRKYGQK	C2H2	AtWRKY49		RKYGQKQVKGSENPRSYYKCTYPNCPTKKKVERSLDGHITQIVYKGSHNHPKPQSTRRST
53	PdWRKY48a	Prudul26A004090C1	Prudul26A004090P1	535	59.41	6.82	-0.964	Nucleus	WRKYGQK	C2H2	AtWRKY33		SQSIQGSSYGISDQSVPTISNPKIESVTMQEDSSASIGEDEFEQNSPISNSGGGEDENEP
54	PdWRKY48b	Prudul26A004090C2	Prudul26A004090P2	536	59.51	6.82	-0.954	Nucleus	WRKYGQK	C2H2	AtWRKY33		EAKRWKGENANDQPFSAPGSRIVKEPRIVVQTTSEIDILDDGYRWRKYGQKVVKGNPNPR
55	PdWRKY49	Prudul26A011586C1	Prudul26A011586P1	342	38.15	6.05	-0.722	Nucleus	WRKYGQK	C2HC	AtWRKY70		SYYKCTSVGCPVRKHVERASHDTRAVITTYEGKHNHDVPAARGSGSYSNANRPASDNGSN
56	PdWRKY50	Prudul26A002073C1	Prudul26A002073P1	336	37.92	5.51	-0.719	Nucleus	WRKYGQK	C2HC	AtWRKY70		NNSNVSMAVRPLALPNHSNLSYLNSLQNTRQPTTERQSPYTLKMLQSEGSYGFPEF
57	PdWRKY51	Prudul26A008567C1	Prudul26A008567P1	333	37.23	5.76	-0.704	Nucleus	WRKYGQK	C2HC	AtWRKY70		>Prudul26A005095P1
58	PdWRKY52	Prudul26A030389C1	Prudul26A030389P1	354	39.93	9.71	-0.802	Nucleus	WRKYGQK	C2H2	AtWRKY74		MAQNQEQPPGPPPSTSSSPLKSADPPPPPPPRPTITLPPRTSFETLFNSGGANSGPGFGL
59	PdWRKY53	Prudul26A022589C1	Prudul26A022589P1	738	80.77	5.99	-0.737	Nucleus	WRKYGQK	C2H2	AtWRKY2		GFSPGPMTLVSSFLSDGEDCKSFSQLLAGAMSPVARPPGFPQLEDRSSADGDDNSEFRFK
60	PdWRKY54	Prudul26A030641C1	Prudul26A030641P1	533	58.84	5.49	-0.834	Nucleus	WRKYGQK	C2H2	AtWRKY32		QNRPSPMFSVPSPGLLDSPGLFSPGQGPFGMTHQQALAQVTAQAAQSSSYFHIPTEYSSS
61	PdWRKY55	Prudul26A009578C1	Prudul26A009578P1	355	40.06	9.61	-0.851	Nucleus	WRKYGQK	C2H2	AtWRKY39		LSTAPATSSTQLPAFTSDSTAPQEMPSGAADSGVAIKESSDISHSDQRSQPSSFAVDKPN
62	PdWRKY56	Prudul26A023218C1	Prudul26A023218P1	254	28.76	5.43	-0.932	Nucleus	WRKYGQK	C2H2	AtWRKY65		DDGYNWRKYGQKQVKGSEFPRSYYKCTHSNCPVKKKVERSIDGQITEIIYKGEHNHERPQ
													SKRAKDSGNPIGNIQANPDLASQVHGGHLNKSKKGQESSQATHDHLSGTSDSEEVGDAET
													RVDEKDEDQPDPKRRNTEVRAEPASSHRTVTEPRIIVQTTSEVDLLDDGYRWRKYGQKVV
													KGNPYPRSYYKCTFPACNVRKHVERASTDPKAVITTYEGKHNHDVPASKTGSHYTANNNA
													LNLRAVNAGTEKINKMDLRNNDQQPIARLRLKEEQLT
													>Prudul26A005633P1
													MAKNQDSERVSVSAPPQPQRPVITLPPRPSAEALFSGGSGASPGPMTLVSSFFPDTYPDS
													EYRSFSQLLAGAMGSPMGSTRPIQFNENPVDGSAQLEGGSENGGEDKSGFKQSRPMNLMV
													ARSPLFTVPPGLSPSGLLNSPGFFSPPSPFGISHQQALAQVTAQAALAQSRMHMQAEYQP
													SSVGAPTEPRAYHPSVMPNEASQQQTLPSTSDHRSSAGQSSEASHSDRKYQPSSVATDRP
													ADDSYNWRKYGQKQVKGSEYPRSYYKCTHLNCPVKKKVERSPNGEITEIIYKGQHNHEAP
													QPKRGKDGGDLNGHLHSQPRPENGLQRLVGDSNGSSENIASHSMLERHQESTQAAPGQLP
													GASDSEELRDGEIREEGDADEPNPKRRNIDVGASEVALSHKTVTEPKIIVQTRSEVDLLD
													DGYRWRKYGQKVVKGNPHPRSYYKCTYAGCNVRKHVERASTDPKAVITTYEGKHNHDVPA
													ARNSSHNTANNNASQLKPLTVVAEKHPLLKGREFGNNDQRPVLLQLKEEQIFV
													>Prudul26A005633P2
													MAKNQDSERVSVSAPPQPQRPVITLPPRPSAEALFSGGSGASPGPMTLVSSFFPDTYPDS
													EYRSFSQLLAGAMGSPMGSTRPIQFNENPVDGSAQLEGGSENGGEDKSGFKQSRPMNLMV
													ARSPLFTVPPGLSPSGLLNSPGFFSPPSPFGISHQQALAQVTAQAALAQSRMHMQAEYQP
													SSVGAPTEPRAYHPSVMPNEASQQQTLPSTSDHRSSAGQSSEASHSDRKYQPSSVATDRP
													ADDSYNWRKYGQKQVKGSEYPRSYYKCTHLNCPVKKKVERSPNGEITEIIYKGQHNHEAP
													QPKRGKDGGDLNGHLHSQPRPENGLQRLVGDSNGSSENIASHSMLERHQESTQAAPGQLP
													GASDSEELRDGEIREEGDADEPNPKRRNIDVGASEVALSHKTVTEPKIIVQTRSEVDLLD
													DGYRWRKYGQKVVKGNPHPRWELSPYESLPIFSSTDCIMQMELGWFL
													>Prudul26A005971P1
													MDPKFYRISPFGTDPADPDQPMTSENGPGSPSSGEETKVATAPSPKKRRGVQKRVVTVPI
													GDVEGSKSKGEGHPPSDSWAWRKYGQKPIKGSPYPRGYYRCSSSKGCPARKQVERSRVNP
													TMLLITYACEHNHPKPTTKPHQTSTAMSPNAEPELPAKTITPNDEELTIFASQVDLDLSD
													DSATLLSAFGWFSDVASTAVLESPLCAGNSSCADYDVATRLGDEEDEYLFADLGELPEGS
													MIFRHKMVESDEQNRRCSLSVVPCCDSR
													>Prudul26A006177P1
													MEKQGRRHHISSKLFHHSVSDCSFNVSDDGLLVDATNNTSSSNPSIPIPIPIKQLFRQTK
													EIKEMDFFSDNNIMNDDADDDEEPRRQPQQDCNNNPPAVNTGLNLLTLNSGISSTSASDI
													HQNSNNKLMTSLQVELERLHEENGELKTMLDQMTKSYSQLQAQLLIAMQKQAQNRLREPI
													KCEANGMLARQFMDPRPSAAAAIDHVRDPSVAYSSGKTPADHEAFSLFAPSNLNIEVMST
													ERDQYQRRLQTNINCAEEALDRSSQCLGSPNYTSKSGDPHLLDDDNDEPNRSTDQVPVAD
													QVPFRKARVSVRARSEAPMISDGCQWRKYGQKMAKGNPCPRAYYRCSMAIGCPVRKQVQR
													LAEDKTILITTYEGNHSHPLPPAATAMANTTSAAAAMLLSGSTTSKEAHQYHHHHLANSG
													FFSNSQLPFFASSMATLSASAPFPTITLDLTQSPMQQFHRIPPPSSSTFPLPLHGYHQLM
													GGLGHPIQAPMYFPPNYKAPPPSAGLSLSGGQRSTSTHSSGMIETVSAAIASDPNFTAAL
													AEAISTIMAAPRPHQGHQGGININDGDIANNNAARGVVASTNNSPPPSANIGVRPGSLQP
													VSPQLPRSCTTFSTN
													>Prudul26A006215P1
													MDDHTPTKRKVDALQQDLRRLRKENEALRFLLTAMTTKCNTLEQLIREKNIERHDQFPVA
													QKTTQFLVRTDSKDNTLIVRDGYQWRKYGQKVTKDNPSSPRAYFKCSLAPRCPVKKKVQR
													CMVDKSLLVATYEGQHNHDAINGSPLGQFSCSSSTAVHNNNIIINPINFPSHGTSANINN
													NDVINIVSPSNSSRPVPITLDLTLSGSTSNQENNRSAGSPQNSSSSAQNIDCESRIEDYV
													AYLTKDHNFTQALAAAVASSITRPSADRQNQ
													>Prudul26A007596P1
													MENYQTFFSSAATPPASSSLSLNMGNPHGAYSTTDHLQFQNNKSPPPANGFLGLMSDMEV
													SNNINSSQSKSFGGPETAVRLGTKKGERKIRKPRYAFQTRSQVDILDDGYRWRKYGQKAV
													KNNKFPRSYYRCTHQGCNVKKQVQRLTKDEGIVVTTYEGMHSHPIEKSTDNFEHILSQMQ
													IYTSI
													>Prudul26A007647P1
													MDDDKDNRDPARTTEFTTQSTWPLDPDSAYFFASHDVRDNTLLTEFGWNFHPDGSRPDGF
													SELDPIGTRDMSDLAATSSQLVADCLRPADSSSSSTAAFRNSNPAPFVGSASTNPSVSST
													SSEDPPEKSTGSVGKPPPEIPSKVKKKGQKRIRQPRFAFMTKSEVDHLEDGYRWRKYGQK
													AVKNSPFPRSYYRCTNSKCTVKKRVERSSEDPTIVITTYEGQHCHHTVAFPRGGVIAQES
													GFAGHHLAQLPPVSSHFMYYPAIQPRERVSPVNLTRTTSHQLASPRGDDEDDDDQAAEGG
													SSHCLDPQTTAVPTDEGLLGDIVPPGMRNR
													>Prudul26A008567P1
													MELSWPESVLSNRERVMEELIQGRELASQLCRVLDDHKSTLVSGCGGGDVGSAEGLVTKI
													LGSFANTIFILNGKEADGEIVSGDQIQGNSSGGGSADSSSWDANHAIIKSEDFHEEISCK
													SASTFKDRRGSYKRRKTSHSWTRDTPALTDDGHAWRKYGQKVIHNANHPRNYFRCTHKFD
													QSCQATKHVQQILDDPPVFRTTYYGNHTCRDYLKASELILDCTSHTESSSYIRFGDNKQD
													HPFFSSFTSVKKEVVVKEEKPQPSDEHLMASHHHNRSSSGDYNVSPHPTAFKSSCPLSGL
													SSTIDPYDYEGDVMSGLIVGPYYFDDEVLQYEF
													>Prudul26A009578P1
													MEDVEEANKAAVESCHRVLSLFSQPQDQVQYRNLMVETGKAVSKFKKVVSLLNTGLGHAR
													VRKRKKLQIPFPERILLDNPNCITDYPSKTPHFIQSSFPENPVQDLGLNVKNSLCLGNPS
													LELSTNGKNPLQPAQQAPPTQYHFLQQQQQQQQVQQQQQQQQRLFLQQQQQMKHQAEMMY
													RRSNSGINLNFDSSSCTPTMSSTRSFISSLSIDGSVANFDGNSFHLIGAPLSSDQNSQHK
													RKCSARGDDGSVKCGSSGRCHCSKKRKHRVKRSIKVPAISNKLADIPPDDYSWRKYGQKP
													IKGSPHPRGYYKCSSMRGCPARKHVERCLEEPSMLIVTYEGEHNHPRIPSQSTTT
													>Prudul26A011586P1
													MEELIQGREVASGQLGRVINLHNNRSLTVNGDHNHDLGSGNGEGFVNKILGSFSNTLFIS
													NGKEMKEFHHHDQIIQVNTSGGGGGGGGGGAAGAGAGASSWDVDHLLDHAIKCEASNEET
													CKSASTSSTDRRGSYKKRKTCHSWIKDSPALTEDGQAWRKYGQKLILNAKHPRNYFRCTH
													KFDQACQATKHVQQVEDDPPLFRTTYYGNHTCRDYLKAYSELVLDCTSPRESSKFIRFDD
													TNLSSKQEHPFFSSFKSLKREECFKEETTPSDYMTTQHHNQLALSDYLVSPPDLPAFASP
													GLMSGFASANTAQLDEDAIYRKMVGFNYDDFAFDEFLQYELR
													>Prudul26A012059P1
													MGSNHKRLIKELVEGKKTATELQMLLHKPLGDHGSASAEELVVKIMTSFTESLSVLAAEK
													KNPGDGHEDHQSGAFGEVYQIKPEPSHSHCDDRSSGDSGESRKVQGSKDRRGCYKRRKTS
													QSWTTVSPAIEDGRAWRKYGQKEILNAPYPRAYFRCTRKYDQNCRATKQVQQVQDNPRLY
													QTTYIGQHTCKSMVPPQMFIGSSDHWESQTVSSESGTPNKQNHDFFGSSAIPIVKQEEYK
													EGTPTPTPSDLTDNLSSLETNHLWSDFKDDFALCDPAAMCVSTKMGSDNEDVVSNMYLDM
													DFVVKSIDFDGDFNFDEVEFPKNSL
													>Prudul26A012168P1
													MDSTFFNSNNSNSRSKQFMSDQEENDNTTSSTPENSSGSPPPPTTNFSDFSKITSTSSPK
													KSARRAIQKRVVSIPIKGDNSNTPPPSDSWAWRKYGQKPIKGSPYPRGYYRCSSSKGCPA
													RKQVERSRVDPSMLVITYSSEHNHPWPASRNHHNHHQSNSSSTAAASAAVTNKPGSNKTE
													APEAQQPDHQDHDPTFADLNDESLLTHDEFGWFADMETTSSTVLESPIFTESGCAGGADS
													ADMAAMVFPMGEEDESLFADLGELPECSLVFRHRGVGPQVQIC
													>Prudul26A012395P1
													MAVDFMGYRNSSFSAKLEENAVQEAASGLESVEKLIRLLSQAQQNQHQDKYPSMVMDMDC
													RAVADVAVSKFKKVISLLGRTRTGHARFRRAPLTLTSGSSSSQNQAQTQETFVKQTPLES
													TKVYHATPIQQIPPPLHHHSTVLESTKDSSTTINFSYSATTSFMSSLTGDSDSKQPLSSS
													AFQITNMSQVSSVGKPPLSSASLKRKCSSDNLGSGKCGAGSSGRCHCSKKRKLRLKRVVR
													VPAISLKMADIPPDDYSWRKYGQKPIKGSPHPRGYYKCSSVRGCPARKHVERALDDPAML
													VVTYEGEHNHSLSVAETSNLILESS
													>Prudul26A013051P1
													MDSEWVNTSLGLNVIPFHPASDDQAPVKKQQELEGDYAKVFEGHASVKQEAAASHVLTEE
													LNRISLENKKLTEMLTALCENYTNLQSHVKELMTTKQQSSDQNDLATNFNKKRKPDSEDY
													SNMIGLTSPGTNTETSSISDEEYPCKRPKENMNLKISRVHVRTEASDTRLIVKDGYQWRK
													YGQKVTRDNPSPRAYYKCSFAPSCPVKKKVQKSAENPCLLVATYEGEHNHMHPETRAEVT
													LIGSISPNQQLSPLSPSMAKRTSPVPTFSCDKNNNLSPREIEGAPPAFQQFLVQQMASSL
													TKDPNFASALAAAISGRFSDHSWMGNW
													>Prudul26A013051P2
													MDMLKQAAASHVLTEELNRISLENKKLTEMLTALCENYTNLQSHVKELMTTKQQSSDQND
													LATNFNKKRKPDSEDYSNMIGLTSPGTNTETSSISDEEYPCKRPKENMNLKISRVHVRTE
													ASDTRLIVKDGYQWRKYGQKVTRDNPSPRAYYKCSFAPSCPVKKKVQKSAENPCLLVATY
													EGEHNHMHPETRAEVTLIGSISPNQQLSPLSPSMAKRTSPVPTFSCDKNNNLSPREIEGA
													PPAFQQFLVQQMASSLTKDPNFASALAAAISGRFSDHSWMGNW
													>Prudul26A013566P1
													MEGDQRGVPSYEVQISFSSTPNPQQSIHEMGFVQFEDHHPHHNQVLSFMAPSSHIQQQQP
													NNSHHPHHHQPAELSSGASAAATTTSNGVTVGFSTHTDLLVARPSWNNSNDQVGTLDPKA
													ISDENGTGNASDCSNSWWRSSSSEKSKMKVRRKLREPRFCFQTRSDVDVLDDGYKWRKYG
													QKVVKNSLHPRSYYRCTHSNCRVKKRVERLSEDCRMLVPRNLRPTLGVTAAGLKQPRCTQ
													RLTGIAHSPKTRGSIDAGLCLKVRLEDRDRACRLKDQLRPKLGEFKWDQGVARRCGRASH
													CGVRPNETGHDLVQLGSQMPWCLLKNAAEVFSSKAVVPFQKYGRALPFAKVVGHILTKVV
													ECFLLKKLGWELLKYLGRPLLLQTAGLGRIFSLRTLVPSSQHLGKQSLAKGVEVRWEVSP
													LRELKFSGRYVRRVPNIRIFENSKIVHHMAKPNIQIFGVLIPLILADGRRMVSQI
													>Prudul26A014175P1
													MEHNQILFLALPKSSDSASPNLSSNPSNISQVFPRFHFDSAGLMKKEAKIYQHCGTSYGS
													VDKMKPGKKEGGKETKKHKYAFQTRSQVDILDDGYRWRKYGQKTVKNSKFPRSYYRCTHQ
													GCIVKKQVQRLSKDEEIVVTTYEGIHSHPTDETSAENFDQILRHLQTYNA
													>Prudul26A015240P1
													MGREKEMGLDIDLSLKIDSKQEKQGEDGDQGEGEEEEEEEEEDLNDDDDIEQGAQQEEDE
													QEPRAQNNNLKAAEAAAGEVEDDASVVETSLEENNMMKTDQELCVLQMEMSRMKEENKVL
													RKVVEQTMKDYYDLQMKFTALHQSNQNKDPQTFLSLDGNDPDAVQGPKTIPKTSPLSQTR
													EDMMKESQLGLSLRLQTSPTTNIKSHGREEEDDDKEENNKKEELTRSSLASSLLQNKLQR
													TELPGISSHVASQPNRKARVSVRARCESATMNDGCQWRKYGQKIAKGNPCPRAYYRCTVA
													PGCPVRKQVQRCLEDMSILITTYEGTHNHPLPVGATAMASTASAAASFMLLDSSNHHLLD
													GTPSHYTQASLPNYYNVPDHRMNPSSHSSSNFRTINPHDPSKGIVLDLTNNFYDHNNTPQ
													NIPMGSSSSAPPALSNWMMSTSRSASGYQNPNSITSRLLANSTISRSSGVGVEDQRSWRG
													EENNMSLAENVTAIASDPKFRVAVAAAITSLINKENHTANHPFGPRGGGENGSSTSNNWA
													LDHQSLSANGKPIRKNSLE
													>Prudul26A015786P1
													MAIDLVGFSRMDDRTAMEEAASAGLQSMDHLIRVLSNQNPSQTQTQTPLDCREITDFTVS
													KFKQLISVLNRTGHARFRRGPANQSSTPVQPKPQTTSIAFSVPKSNNDDSLTLSPPISTT
													SSFLSSITIGDGSVSNGKAVSSILAPPAPAFSAGKPPLSQSHRKRCHDNEVAAKTSSSGR
													CHCSKRRKTKVRRTIRVPAISSKIADIPSDEFSWRKYGQKPIKGSPYPRGYYKCSSVRGC
													PARKHVERAQDDPTMLVVTYEGEHRHPHPSITAGSVGLVFQ
													>Prudul26A017436P1
													MVHQHRSLTKAYIQLPFKFPHHHYMFKSKTSQKEPKQQLEAMDETTISLILHACKLARDL
													ESNLPNLANQPNLLSNSLDEITRNFVTARERVCGQDPSTSSSLHNMLTLAHQQQIRTSQV
													QEWLRSSYGQQAMDIIQTQLVADQKEVKIGGCIDDGDAEVKGLQAMDIVSASDTNIASSS
													SQRPRRRKDEGLISKITVPAPRIGNTEIPPEDGFTWRKYGQKEIMGSRFPRGYYRCTHQK
													LYNCPAKKQVQRLNNDPLTFEVMYRGEHTCHMSATAPSIPPPSAEHHNATQGSLAQTLAT
													TTTTDPPTASLWLSMDFNPIRGGSGSSSRMIGGDRGGGGDGAGTSTTTRYGKEVDFPVVD
													LADAMFNSGSSSSNSMDFIFHSAENKWESEDKKNGGQ
													>Prudul26A017718P1
													MDKGWGLTLDSESFGFFLNKPPAAVKLDHHQNNSKRSNFFGGERMFPGIEFPVKLGGRED
													QLAAPQPSIHDNNNRVVVDEVDFFSDRKNKHNTTTTDDDHQDMKSNGTISVKKENWTGLD
													VNTGLHLVTANTGSDQSMVDDGISSDMDNKRAKNHELAQLQVELQRMSSENLRLKEMLGQ
													VTNNYSALQMHVAAVMQQQQQQQNHTAAADQSSQLNHDQNVEAKSDQEKKQGLVPRQFLN
													LGPRATAETDDQVSNSSSEARTRSASPQNINEAASSKDHHLKKNDHPIGPLDPENSNNFR
													DGKRVGREESPESESQGWVPNKAPKLNSAANKPIDQSTEATMRKARVSVRARSEAPMITD
													GCQWRKYGQKMAKGNPCPRAYYRCTMAVGCPVRKQVQRCAEDRTILITTYEGNHNHPLPP
													AAMAMASTTTAAASMLLSGSMSSADGIMNPNNLLARAILPCSSSVATISASAPFPTVTLD
													LTTTPLQFQRPQSQFQVPFPGQQPQLPQVFGQALYNQSKFSGLQLSQDLMGSNSQQQQQH
													LPHQTQSASFADTVSAATAAITADPTFTAALAAAITSIIGGGHPNNNNNNSASTTSNNSN
													GGNNNNSNSKMSGFPGH
													>Prudul26A017718P2
													MDKGWGLTLDSESFGFFLNKPPAAVKLDHHQNNSKRSNFFGGERMFPGIEFPVKLGGRED
													QLAAPQPSIHDNNNRVVVDEVDFFSDRKNKHNTTTTDDDHQDMKSNGTISVKKENWTGLD
													VNLAQLQVELQRMSSENLRLKEMLGQVTNNYSALQMHVAAVMQQQQQQQNHTAAADQSSQ
													LNHDQNVEAKSDQEKKQGLVPRQFLNLGPRATAETDDQVSNSSSEARTRSASPQNINEAA
													SSKDHHLKKNDHPIGPLDPENSNNFRDGKRVGREESPESESQGWVPNKAPKLNSAANKPI
													DQSTEATMRKARVSVRARSEAPMITDGCQWRKYGQKMAKGNPCPRAYYRCTMAVGCPVRK
													QVQRCAEDRTILITTYEGNHNHPLPPAAMAMASTTTAAASMLLSGSMSSADGIMNPNNLL
													ARAILPCSSSVATISASAPFPTVTLDLTTTPLQFQRPQSQFQVPFPGQQPQLPQVFGQAL
													YNQSKFSGLQLSQDLMGSNSQQQQQHLPHQTQSASFADTVSAATAAITADPTFTAALAAA
													ITSIIGGGHPNNNNNNSASTTSNNSNGGNNNNSNSKMSGFPGH
													>Prudul26A018032P1
													MDCLQNPNPSSAGPYHFGESIDPSMDFDEFSDYFMLDYGVDDHQDSSSLSTVSPEKFMAD
													RSTGSSGGATSRNSNNNMKCRNEGRKNKIEMGHRVAFRTKSELEVMDDGFKWRKYGKKSV
													KNSPNPRNYYKCSSGGCNVKKRVERDREDSSYVITTYDGVHNHESPCVVYYNQMPPPVDP
													NNIWTLRASSQSSASS
													>Prudul26A019298P1
													MEAALGKSNSHGGSEKEEKRLVLESSSLADHDDQEAAGSKEDTLLKVGNGGSCQENNEMK
													SSSPTQKDLSSSKQISTTSNMKVEPDHSMASTSSSRKEHDYQLESARAEMGEVREENQRL
													KKYLDRITDEYQTLQMQLNDIQEKANKSKDVTIARPNNIYNHQDDESEMVSLSLGSFSSR
													TKKDEKNKNRSTSSQGKENESDRESLSLGLDCKYEAPKSSATTTEVPLSNSSPASSLEEV
													PKEEAGQTWPPKKVLKTARSAEDEVAQQNPVKKARVSVRARCDTPTMNDGCQWRKYGQKI
													AKGNPCPRAYYRCTIAPSCPVRKQVQRCAEDMSILITTYEGTHNHPLPTSATAMASTTSA
													AASMLLSGSSSSARSGLNPYVGAATTAAHDLHGYNFYLSDNSKSRFFIPNSSLSSSLPTI
													TLDLTSNPPPPSSSSNPLSHFNKFSSSSNSSHQLYPPTSLNFGSNSESNTNMSWSNGLLS
													YGAQLPPHNINNKNQIGSLSSHGIRQQQQPLQNNIYQNYMHKNNLNPTPPPHPSQGASPH
													QFQPDPIAAATKAITADPSFQSALAAALSSIIGSNSNVGTGGTTGMLGNNNNQAGGGDNI
													NMAQKFKWGDQFAGSTTTTSSPYLQTQIGNNSTIGCASSYLNKTTSANSQPGSLMFLPPS
													LPFASAPKSASTSPGDTRDHKSL
													>Prudul26A019680P1
													MADDWDLYAVVRSCKSATHATTTNTSAAGAPTNPITPPSAEEEYPFWDWLKSEEETDPLF
													SFPNLLEPRANAFQELQQFYEPLLPNPTTTNNPSTNNNTFVPPIIPNSPIISDFGGSASS
													GQHHLQQQQHHFLPTNTPASPHFNPAIFPPGFGEFHGQQQPLLLPKPETQILPQQLPTQQ
													GFMRPRAMVPALPPPLPRVPFTMPINSPRPRKRKCQQKRQVCQVNAENLSADLWAWRKYG
													QKPIKGSPHPRNYYRCSSSKGCSARKQVERSTADPNIFVVTYTGDHTHPRPTHRNSLAGS
													TRNKLSAMAGQNQPINNDSGSPPAQADQDVVANNVNSDNSLDKENEELDEDEEERDENEI
													EDEDVEEDDVLIPNTAMSDEIFLGLKQLGCTS
													>Prudul26A020675P1
													MEGHQEPNYPPPLTPSSLISLPFLLPPQNPLFTPSSTSTAPSSSSQLISPPLLEPQQHQV
													LPDIDWVSLLSGSPAAGFDGQEINNYKPLVENNNVGASAENINEADREGKGANSKRKGGG
													RMRKPASRPRFAFQTRSADDILDDGYRWRKYGQKAVKNNLYPRSYYRCTQHTCNVKKQVQ
													RLSKDTSIVVTTYEGTHNHPCEKLMETLTPLLKQMQFLSRF
													>Prudul26A020687P1
													MDGRETGELKTTIDQISMANSTVFSDEIIPGSSFASFASSGGSIFDMSDNNQRGSGFMDL
													LGFQDFNMPPSLFDFSSSQTTSSSSSSMMMVMMPPHHQQQQQPPLASPTSTPTAVALPER
													ESTTSEVLNGSTAPTTPNSSSISSSSNEAAANKNEDQTTTKAQDEEADEQNQDPEKTQKQ
													LKPKKKNQKRQREPRFAFMTKSEVDNLDDGYRWRKYGQKAVKNSPYPRSYYRCTTAACGV
													KKRVERSSDDPSTVVTTYEGQHIHPSPIMPRGTMGIAPLPDQPSAFSSSPFGVQQLLPHH
													HYQQQQQQQQPQYSYIYSSAPSLNISSPAYGGGAFNPSSFSTGLLQERYNFGSPSSSSSA
													VSNLLRDHGLLQDIVPQIRKEAKEEDHLHQ
													>Prudul26A021325P1
													MPNSNSRTAPEKKVDESVGYQEIYGREESELENARAEMGEVREENARLKLTLQHMEKDYQ
													SLQCRFLDILRQEASKKATNVDVGVHRIEEPNQLLSLCLGRSPREPKNDETNTTNFTKLV
													QVDHEDLNANLTLGLANSKLMELPMELVRRQKPQETSLEEPKDHSEAGAGESLPPSSKTP
													KTTRNEDDEVPQQANAKRARVSVRVRCDTPTMNDGCQWRKYGQKIAKGNPCPRAYYRCTV
													APACPVRKQVQRCYEDMSILITTYEGTHNHPLPFTASSMASTTAAAASMLLSGSSTSQPG
													FGSTATLLNGSDFGVFDSSITNQLYLPKSSNPLLPTITLDLTASPSSSQIHLNRLSSSFA
													SACPFPSSLSFCSSESNISPNSRGNGYLKYGSLPFDKGSFNLDQPYAEKNQQSSSQLSLT
													ESLTKAITSDPNFKSVIAVALSSMVGGGAATHRNQGEGERLGHHLKWSEAAHQFTSHNPL
													IQNGKGCSTPSIFNRLSSSDSQK
													>Prudul26A021799P1
													MAGIDDNVAIIGDWVPPSTSPRAFFSSMLVDDIGSRSMLEPPSSNKTAEFFLGSQEGDTN
													GKNLSQGNASGEELNEVGSFSEYKSNSRGGLVERIAARAGFNAPRLNTESIRSSDLSLNS
													DIRSPYLTIPPGLSPTILLDSPVFLSNSLAQPSPTTGKFPFVSNGHSRSSTLMTEGLDKT
													NFFEDINTSFAFKPIAESGSFFLGPTSKMGSTGFPHQSFPSIEVSVQSENSSQSIEPTKV
													QNQNTTKVQNQNTNNLQLQADFSRTSTEKDNGANSADPRAFDTVGGSTEHSPTLDEQPDE
													EGDQRGSGDSMAAAAGGTPSEDVYNWRKYGQKQVKGSEYPRSYYKCTHPNCQVKKKVERS
													HEGHITEIIYKGAHNHPKPPPNRRSAAIGSSNPLNDMRPDIPEQGGPQSGADGDLVWAST
													QKANVGAPDWKHENLEVTSSASVGPDYCNQSSSMQAQNGTHLESGDVVDASSTFSNDEDE
													DDRGTHGSVSLAYDGEGDESESKRRKIEAYATEMSGATRAIREPRVVVQTTSEVDILDDG
													YRWRKYGQKVVKGNPNPRSYYKCTNAGCTVRKHVERASHDLKSVITTYEGKHNHDVPAAR
													NSSHVNSGPSNTMSGQASSAGIQTHPHRPEPSQVHNSMARFERPSSLGSFSLPGRHQLGP
													SHGFSFGMNQPGLANLAMAGLGPGQPKLPVMPVHHPYFAQQRQVNEMGFMLPKGEPKVEP
													MSESGLNMSNGSSVYQQLMSRLPLGPQM
													>Prudul26A022589P1
													MGFLRTMDQEDDAVAENKTKGCGPGANTISIAERRAAKCGFNAERINTARFRTTSPLPSP
													AAAARSPCLTIPPGISPTALLDSPMMLPNSQALPSPTTGTFPLLPPSDDSSVLKSGTHED
													GHRGSDFGSSFTFKRQGNPKYLPGYSSFENQGSTVDYQSLVLEQQPIDFEFPMEFPEEAN
													AKNYAVDPSTHVKNLNSGILNANCVDLQRSNSSAASEQNSLPKEPIHGEDVGSHPFLEGE
													HRGSYPSAGMVRTSEDGYNWRKYGQKQVKGSEYPRSYYKCTHPNCQVKKKVERSFDGQIT
													EIIYKGAPHNHAMPQPNRRAGASLGSSFSFDETSEMSEGSRASVKVEGGSVWTNIQSGKD
													IKTGYDGRAEGLERTSSTSVVTDLSDPLSTTQGKSMSIFESAETPEFSSTLASHDDDDRA
													TQGSISLGDDADDEESESKRRKKESCLIEPSLASRAVREPRVVVQIESEVDILDDGYRWR
													KYGQKVVKGNPNPRSYYKCTSAGCSVRKHVERASHNLKFVITTYEGKHNHEVPAARNSNH
													INSNGGNAHPSTANAQPALALPRSSNNPKPETQVQDLAPHFDRKPEFHEEYLRSSFLGNF
													NNDLKFGVPSIYQMKYPLQNTMPYSSFGLHANHGVTHQAGSVVPDFPISLPLNLPPSGNL
													PLSGFDFNNGKSVCPVQPYFSGQQLQEDDVRFLKPKQEQKDDNLYDACLPIIDQANASLS
													SSSSSSLLYQRIMGGYPS
													>Prudul26A022742P1
													MSNEKKNPYQYDPFDYNPHEINRSSFPFFNYGTHSIQDPQNLHGFESDHPNSSFMSFTDC
													LHGSMDYNTLSKAFDMSCSSSEVISPQLDHENSKNQQAAGAAGVGDHSVGTSTTENPSTP
													NSSVSSSSNEAAGSHEHEDSEKKKKEKQPKVAVCDEAAGDEEDKSKKGSKAKKKEKRQRE
													PRFAFLTKSEVDHLEDGYRWRKYGQKAVKNSPYPRSYYRCTTQKCVVKKRVERSFQDPSI
													VITTYEGQHNHQCPATLRGNLNLNAVGMLSPNPLLTSASLNGSARFQHEFLTQFLPMNNQ
													LQLQLQSHHHQDDHQASNSMIYSNLVAPHPHHHHQQHQRQQRQQLHVPDYGLLQDLVPSF
													GHKQEP
													>Prudul26A022804P1
													MEGHQEQYYPPPSTLSSLPLLPPHPSYLFPSSSTSMNPPLPEPHHQQQAQLPDIDWISLL
													SGHHDHQINNNEPAAMVEVNNNENNVIEAAQEEKGSNKRKGGEGRKISVMKKASRPRFAF
													QTRSADDILDDGYRWRKYGQKAVKNSLYPRSYYRCTHHTCSVKKQVQRLSKDTSIVVTTY
													EGVHNHPCEKLMETLTPLLKQMQFLSRF
													>Prudul26A023213P1
													MDSSKSWEHKSLLTEIIEGMELAKQLRLSLSAASSSDTRQFLVQRILSSYEKALLILNFS
													GPAQSTAGAIASVPESLVSAYAGPCFDDYNKSPKDHQDLTDVSKKRKIMAKWTDHVMRVS
													SENGIEGPHEDGHSWRKYGQKDILGAKHPRSYYRCTYRNTQSCYATKQVQRSDEDPTIFE
													ITYKGKHTCSHGSNSVLPPPSPEQQEQKRNKQNNTSHQQQSQVNQMSFPTNLRVDTKFLE
													DRENMASPFSFTSTSFGCMMPDDAFLSSMLDDNNTFFDNFNHSLLSPAAGESNYYLMPPS
													QMRNIAGNEQLSECGLTEIISANNSSTNSPIPDMDFPLDPVEIEPNFPFDTTGIFS
													>Prudul26A023218P1
													MDETLSPEPDSEVPKELRPEGQASKRRKVVHEKTVVTVKIGTNVGKLKNEGPPSDSWSWR
													KYGQKPIKGSPYPRGYYRCSTSKGCSAKKQVERSKTDASVLIITYTSSHNHPGPDVSTTN
													LTQLQPSTEDHNLPALLPKQEEQEEKQGKLEDHPAMKSDHEDHFHYIQSPIRSSQNIMID
													QEEDPFLEKTHVSSTLGFLLDEEPLSYSQLMSFSTPKSEENDFFDELEELPTFSSFPSFM
													RSNLSLERIPSVPS
													>Prudul26A023323P1
													MENWDLQAVVRGCNTTANIDEAMENSQIPYCFAPLSIEEEDDFFHALPQLFEATAALDEL
													EELYKPFYPVLQPSAPPIILASSMSVPQEAITVEVPKKLKESSTVRKKISRKNQSKRVVK
													EVRAEELFSDVWAWRKYGQKPIKGSPYPRSYYRCSSSKGCSARKQVERSCSNPETFIITY
													TAEHNHVHPTRRNSLAGSTRSKFPSSKNKDNCKSSLNSPATTNLAASIEEDHDVQSASTS
													TVKEEAQLLLEEDEISHENVMLDVMLSDEIIPSLEDLDRELEPVMDGWFLDQFSDNFPSP
													WFNIGHSNTVTGAC
													>Prudul26A023323P2
													MENSQIPYCFAPLSIEEEDDFFHALPQLFEATAALDELEELYKPFYPVLQPSAPPIILAS
													SMSVPQEAITVEVPKKLKESSTVRKKISRKNQSKRVVKEVRAEELFSDVWAWRKYGQKPI
													KGSPYPRSYYRCSSSKGCSARKQVERSCSNPETFIITYTAEHNHVHPTRRNSLAGSTRSK
													FPSSKNKDNCKSSLNSPATTNLAASIEEDHDVQSASTSTVKEEAQLLLEEDEISHENVML
													DVMLSDEIIPSLEDLDRELEPVMDGWFLDQFSDNFPSPWFNIGHSNTVTGAC
													>Prudul26A024381P1
													MAVELMNFPKMEDQKAIQEAASQGLKSMEHLIRFLSHQQQTNQSSRLDCTDITDHTVSKF
													KKVISLLNRTGHARFRRGPVQPDPSVQFPSSSSHPSYSQTLSLAPALNPRPSPAPAPVTT
													PAIVPPAPVESSYVQSQPHSMTLDFTRPNVFASNPKSTEIEFAKDSFSVSSSSSFMSSAI
													TGDGSVSNGKQGSSIFLTPAPAVSGAKPPLSTAPFKKRCHEHDHHSDDASCKYSGSGSAS
													GSGKCHCSKRRKNRVKKTIRVPAISSKIADIPPDEYSWRKYGQKPIKGSPYPRY
													>Prudul26A024381P2
													MAVELMNFPKMEDQKAIQEAASQGLKSMEHLIRFLSHQQQTNQSSRLDCTDITDHTVSKF
													KKVISLLNRTGHARFRRGPVQPDPSVQFPSSSSHPSYSQTLSLAPALNPRPSPAPAPVTT
													PAIVPPAPVESSYVQSQPHSMTLDFTRPNVFASNPKSTEIEFAKDSFSVSSSSSFMSSAI
													TGDGSVSNGKQGSSIFLTPAPAVSGAKPPLSTAPFKKRCHEHDHHSDDASCKYSGSGSAS
													GSGKCHCSKRRKNRVKKTIRVPAISSKIADIPPDEYSWRKYGQKPIKGSPYPRGYYKCST
													VRGCPARKHVERAPDDPAMLIVTYEGEHRHAPENVGLVFEST
													>Prudul26A027240P1
													MAVELMMGFIDSFAAQMEENAVKEAASAGIQSVEKFISLISQHHHQFQDSSFSSSSNPEA
													ATEYKAVADMAVNKFRKVISLLDKGRTGHARFRRAPVTPSPPPPPPPPPQKTETQIPRPS
													IQEPHNPKTDQPPGFKTEQSSAFKVYCPTPSVRLPPLPHNPHLKTTPVVLTKSVGCAERK
													LDAPTTINFSPSPSISAANSYMSSLTTGDAEGSVQHSMSSGFQFTNMSQSSSGKPPLSSS
													SLKRKCNSMDDVAALRCGSSSGRCHCSKKRKSKVKRVVRVPAISMKMADIPPDDYSWRKY
													GQKPIKGSPHPRGYYKCSSQRGCLARKHVERALDDPTMLIVTYEGDHNHSHTVTDPTPDL
													VLESS
													>Prudul26A027479P1
													MEDAMGATWSDGSEEELVRELLDNETPFFVLPEEALQSQMSVSNEDSVVNRFIPTVYSGP
													TIKDIETALSVTTGTIQPQELSPARLSTLERGLSKVEHKYTLKIKSCDNGAMADDGYKWR
													KYGQKSIKNSPNPRSYYRCTNPRCSAKKQVERSSEDPDTLIITYEGLHLHFAYPFFPLNN
													QAQNTSPPMKKPRNKTSQPRTEDREHEAQESPRSITPDPDPDLQPGPFPDQHQEFVEKEP
													STQGLLQDVVPFMIRNPNPSSASSNSSCSSYQSSPTSPSSLSWATSYFDVGFNHSCG
													>Prudul26A027932P1
													MDATTLDHPSGPSDDFDPGLTDFNPGSDPTLFSSTGGGGGAKYKLMSPAKLPISRSPCLT
													IPPGLSPTSFLESPVLLSNMKAEPSPTTGSFLKPQMMYGSLSSTTYSATTICSDFDTFDE
													RNYGSFEFKPHAGSTMVTTDYNHQRNDQLVQGQAQPQSLVSPPLVKSEMAVSSNELSLSA
													PVCMVTSGASAPPEGDSDDLSQRGHPNPGVQTSQFDHKGSGPSVISSDDGYNWRKYGQKH
													VKGSEFPRSYYKCTHPSCEVKKLFERSHDGQITEIIYKGTHDHPKPQPSRRYNTGAMMPI
													QEERSEKASSLIGRDDKPSSIYGQMSSTNEPNSTPERSPVTVNDDSVEGTGSLSNRMAEE
													IDDDDPFSKRRRMDVGGVDVTPVVKPIREPRVVVQTLSEVDILDDGYRWRKYGQKVVRGN
													PNPRSYYKCTNAGCPVRKHVERASHDPKAVITTYEGKHNHDVPTARNSSHDTSGPTTVNG
													PSRIRSEESDTISLDLGVGINSAAENKSNEHLQLHSELMERQSHTSSNFKAIQTTPVSTY
													YGVLNSGMNQYGSRENPSESRSIEIPPLNHSSYPYPQNMGRVLTGP
													>Prudul26A028352P1
													MASSSGSLDTSANSHPTFTFSTHPFMTTSFSDLLASGTDEDPSTNTTARHVGHGGLADRI
													AERTGSGVPKFKSLPPPSLPISPPSVSPSSYFAIPAGLSPAELLDSPVLLSTSNILPSPT
													TGSFAAQAFWKANSGNNQQIVKQESKNYSDFSFQTQTRPLTSSSTMFQSSNSTIQTAQEQ
													AWSNSYFQAQEPQKQDDFSSGKSTVKPEYGSVQSFSSGMATNIQNSSQANGGFQSEYSNY
													NHQQSQTLSRKSDDGFNWRKYGQKQVKGSENPRSYYKCTYPNCPTKKKVERSLDGQITEI
													VYKGNHNHPKPQNTRRSSSNSSHAIQGSNPNTNEIPDQSFANHGNSQMDSIGTPENSSIS
													MGDDDFEQSSQKSKSGGGDEFDEDEPNAKRWKKEVDNEGISAPGSRTVREPRVVVQTTSD
													IDILDDGYRWRKYGQKVVKGNPNPRSYYKCTNPGCPVRKHVERASHDLRAVITTYEGKHN
													HDVPAARGSGSHASVNRALPNNNNINNNNNNVATAMRPVAHQTNNLRQQTSEGQQAPFTL
													EMLQSPGSFGFAGFDNSMASYMNQAQLNENMFSKTKEEPRDDAFFESLLC
													>Prudul26A028388P1
													MAKGSGLSIDSDPFGFSLHNPIVLNSFQQDQYNHHQPCRTKKQQLHYSSLNMDMDASTIH
													QRSPPPPPLPPPTLQFSVNLNCTHEDVDNHHHHHHHHHQHSPEPPSNEKRKVIDERDFFA
													DNKSHVGQDKSASADPADKMDLHGPTDMEFNVNTGLNLLLTNTSSEQSVVDDGISSNIED
													KRAKSELAVLQAELERMNAENQRLRGMLNQVTTNYNALQVHLLTLMQSQKAEQNSSAAEG
													HGVFDGNNKVVVEEKKLINSNGSPVVVPRQFMDLGLAANNADTDEPSQSSSEEKSRERSG
													SLGENVKVAGHSDDQEKKEFGRGIGREESPDQPSQSWGPNKVPRLNSPKEVDQTEATMRK
													ARVSVRARSEAPMITDGCQWRKYGQKMAKGNPCPRAYYRCTMAAGCPVRKQVQRCAEDRT
													ILITTYEGNHNHPLPPAAMAMASTTSSAARMLLSGSMPSADGLMDSNFLTRTILPCSSSM
													ATISASAPFPTVTLDLTQSPNPLQLQRPPGQFNIPFPNPSQNFTNGPVSLLPQIFGQALY
													NQSKFSGLQMSQDMERGQLGHQQQPGHQGQQQNSLADTVTAATAAIAADPNFTAALAAAI
													TSIIGNAHPNNNSNNGTNPATNSNNNNGNGNGNTTSNNNKLSNSSFSAN
													>Prudul26A028617P1
													MEMPKRRSKAMENNNTEENSFLGNTPVEDKTKKSDDGHDEEGTSMEMEISKSSSSMDITI
													QGRHGWLAEPEQTNTSMPSSSAGKDRALIKHPQEKELQSAKAKMGEVKEENEKLKLLLSQ
													IVRNYQSLQMHFLGLLQKDEEAKKSMDPSSSARDQSNEQDEEADELVSLSLGRSSSTDQP
													RKDEQMKKTSHFSKNGKGDDEEGLNGAGLALELGCRFEPAADQSTEVVMKNSSSDNSCGD
													PKEDDPTEIWPPSKTLRTTRSGDDEVSQQTHLKKARVSVRARCDAPTMHDGCQWRKYGQK
													IAKGNPCPRAYYRCTVSPSCPVRKQVQRCADDMSILITTYEGSHNHPLPMSATAMASTTS
													AAASMLQSHSSTSQQDHTAMAPISASTNLQGLNFSTSTLSQNSRLPQHFYFPNSSISTTN
													SHPTITLDLTAPSPSHFGRFPAAVFSSNPRYPSTRLNFSSSPSSSLDHNNNTLQLQAPWN
													NNHTAANYLNYGNRVLNQVGSTLNMGKQSIFQEPNNLYQSYIQNQKPPPPPLPPPPHQQL
													MLTETIASATKTITSNPKFQSALAAALTSFVGTNNGGSATTGVRENHHHHQHQSSTSTES
													ASGLKLKWAESLTTNPIYPPSPNGIGCASSYLNKSS
													>Prudul26A029053P1
													MISLGEPGTDKIASDIVPKKESSNSEIHAPHQTPDNGICPLQSDHRGNVQSLIPEKSLQL
													PDGVGTASQSNQEGSVTSLTSEKAPQTPETSALVLQSGQEGSTPSTARERGLEDGYHWRK
													YGQKLVKGNAYVRSYYRCTHPKCPVKRQVERTHNGQITDTVYFGEHGHPKAQVSVPVAVS
													FLVSIVEERPEELLLTGVKGKPSDVHGHTSNQIEPVDPSQLSTVADNEGVQRVLSQSNRT
													RDGDPDSKRQKKEKHNGNSIPVDKPAGEPRVVVQTMSEADIVNDGYRWRKYGQKLVKGNP
													NPRSYYRCSNPGCPVKKHVERASHDSKVVIATYEGQHDHDMPPTRTVTHNAAASNVITTA
													RNGESGTTSEGNAVCHDTSPKHEDKPNKQLNVEPRTKSSDVAGCDMVVDSDLGPERKLNE
													QVVGKACTTEESDAPDIIVPRANELQNGESGIKSEGNNACIDTVVHGNLCPESNSPEQKN
													PKAEPV
													>Prudul26A030043P1
													MSDHEHKDLYYHDLFQYEDHEHLNGGMISINHNQNLQGIEVPSYMNNTSFAECLKGPMDY
													NTLATAFGLASSTSDEVIFSSANEGDQKPAEHIRYSGGVGDGDGGGGETPLTPNSSVSSS
													SAEAGAEEDSGKSKKDRQPKGSSEDGGDSSKKVMSKAKKKGEKKQREPRFAFMTKSEVDH
													LEDGYRWRKYGQKAVKNSPYPRSYYRCTTQKCGVKKRVERSFEDPSTVITTYEGQHNHPL
													PATLRGNAAASSAFFPHAAAAFNYAPITGSAGPSSNFPQELLFQMPHHYMINNNNQGSSR
													SVVVNPHHPHPHHQQQHQLPRADQHGLLQDLLFPSMFLKQEP
													>Prudul26A030389P1
													MDEVEEANKAAVESCHGVLSHLCPPKGQVHCKNLLAETEEAVFKFKRVVSLLGGGLGHGR
													VRKLKKFKPPPLPQNIFLDGPNYRLDISTKPLQLLPPPSLENRRAEKDSKYGSSLQHTHS
													QKVFLGNPVVDLDMKIKHPLQIPKTKPLQQYHFLEQKHDHQQEIQRLQLQPQQLKYQADT
													MYSGRNRGINLAFDRSTTRTPSMSSARSFVSCLSMDGGVANTHCDSFQLIRGVPQPPDRI
													SQQQRRCNGAGEKGTVKCGSSGKCQYPKKRKVRVKRSFKVPAISNKIADIPADEYSWRKY
													GQKPIKGSPYPRGYYKCSSMRGCPARKHVERSLEDPAMLVVTYEGEHKHSPSDQ
													>Prudul26A030482P1
													MCSLFMPITRMENYQGDLTDILRAGSAATSAAGAYHSDHLLHHHHQEPEAAADSWHFPSD
													HPPPMKFSSASSAMEEEEEEDAKDNFGDPFSSYMRDPLLHELDISSSSSFFISPNSSSDM
													NINITSVDEAGGTSSTFGGAHIVLAPPPPPPPHHHHLHHHQQGGALVDGDPIKRPCNIFS
													RMLQISPSAKVPVTACDSPLLGAATAVSSPRGISKAVSGSISGAMVGSDMIINGNSSSGK
													GCLLENTGVQISSPRNPGIKRRKSQAKKVVCIPAPAAANSRPTGEVVPSDLWAWRKYGQK
													PIKGSPYPRGYYRCSSSKGCSARKQVERSRTDPNMLVITYTSEHNHPWPTQRNALAGSTR
													SQPSKSGAGSKASSNSSHQPHQKPASPTKEEQNETMNDNNHVSPVITAGSASTVKEEFED
													IEKQLELDHHQFIGDHQAGFPYRPSMPDDQSNQSHHNEDFFADLGEIEADPLNLLFSQCF
													TPDEQQKGSKAAALDPFNLFDWSGDQNTNNNTTSFGEAAKRRL
													>Prudul26A030641P1
													MAEHESFDALQVEKLKPNEQEQEEDEEGDEDEDEDEEGKRLGEIQLSELQNSAPESREMQ
													LETLAVPSTLELSENDQCAGFQVNSTSQSIDGAQLQEQLGVSHQEILAIVTHQDAQMQTQ
													SPVQLAVYPTPLSELSPTSVTQSIQTQTQSPLQLTVYPTPLSELSPTSVTQSISSAPSPI
													LLEQKLPPEKVNTLCTPEVDKQNSSDHKFISSVALVKTSASDGYNWRKYGQKQVKSPQGS
													RSYYRCTYSECYAKKIECCDHSGYVTEIVYKSQHTHEPPRKSNCTKESKLALSAECVRNS
													VTEHPCRTVNDSEPSTSSKERIQETPSIPERKRQSPSDSDGNGDVKIKEEHGDGDEPEPK
													RRVKKSNLEYSTSLLKPGKKPKFVVHAAGDVGISGDGYRWRKYGQKMVKGNPHPRNYYRC
													TSAGCPVRKHIETAIDNTSAVIITYKGIHDHDMPVPKKRHGPPSAPLVAAAAPASMNNLH
													IKKTDTHQNQISSTQWSVDTGGELTGEALDLGGEKAMESARTLLSIGFEIKPC
													>Prudul26A030807P1
													MEKYQMFFPCSSSTSSANYDPMIPISATNNITTDDHHMGMGSSQVYNYFDGRDQSSNGLL
													GLRSSAGNHVGREVLINKDHHQYLQQQYSDLTTTASANININNVIVGADQNPHEATNSGN
													KNKGEKKTRKPKYAFQTRSQVDILDDGYRWRKYGQKAVKNNKFPRSYYRCTYQGCNVKKQ
													VQRLTKDEGIVVTTYEGMHTHPIEKPSDNFEHILNQMQIYTPF
													>Prudul26A031132P1
													MDIKEAERVVIAKPVASRPTCSSFRSFTELLAGAIDASPSNISSETAVPAIRPKTVRFKP
													TVNHAVSGLVSSQAEMSGTAHSNSSEKISKSDSRASVVYKPLAKVVSRATVSVLANMGNF
													NTSHQSTQSSVEAGVLHQNQDKCFRSQLSPNLRHNNPSCAETNQTIEPLKIASQNVEEDP
													KHIPSTANTDRPSYDGYNWRKYGQKQVKGSEYPRSYYKCTHPNCPVKKKVERSLDGQIAE
													IVYKGEHNHSKPQPPKKSLSGTQGLGLASDGTGQDTNNRLWNSQLNERNEGSEGRVEDQN
													EVGLPVHSYQSKAPLLYDPLASGGINAGGGTPDNSCGLSGECEEGSKGPEAEDYEPRSKR
													RKSENQSNEGGISGEGVPDPRVVVQSSVDSDMTGDGFRWRKYGQKVVKGNPYPRSYYRCT
													SLKCSVRKHVERVSDDPKAFITTYEGKHNHDMPLRNTNPGASEKDAQAPTSKEKP
													>Prudul26A031374P1
													MDVKKDVVKMEDNSTNIGCGFSSSPFSGIFDFCEGEKSSSLGFMELLGAGQDFCTNSLFD
													YLPQTPSMLPSLAPNFPKTSIMAKECSDYSLNQQPATPNSSSISSASSEALNEEQTDNKG
													AADQDEEEEHDQPKTKKELKAKKASQKRQREPRFAFMTKSEVDHLEDGYRWRKYGQKAVK
													NSPFPRSYYRCTSTACNVKKRVERSFNDPSIVVTTYEGQHTHPSPLIPRPTLTASASAQP
													NITTTFGVPSMPRTLLSHHYQQQLQPFNFCNYVNGGSPTANASGTGFHRERRFCTPATGS
													AMLTDHGLLQDIVPSHMLKQE
													>Prudul26A031546P1
													MEDDWDLQAVVRGCSTGTTTSNRSTATSNSNNSTCFKISNFHSSPAFSSSFGTATLQPGL
													QQQQFQVLFSLPDPIKPRNAIEDLHELYKPFFPKSQPPLSSQITPPPNLSPLTSLTPLTA
													PKDQTHPIQQHQHQNHYQQQQQQQQSKPSSHSVSSTTTPRSKKRKNQLKKVCQVPAESLS
													ADIWAWRKYGQKPIKGSPYPRGYYRCSSSKGCMARKQVERNRSDPNMFIVTYTAEHNHPA
													PTHRNSLAGSTRQKPFSPQTGTGSDSTKPTSPATSASVDEDPVVPQSTTMESFKEEKGSP
													MVDDDDDELFGMCDSVVSDDFFVGLEGLAGDYFSDHSPTSFGVPWVSSNAATAAGSI
													>Prudul26A032520P1
													MDYSSAAYDDTSLDLNTKPLRLFDDTPIKKEVHSKILIDFGRQLSANEESGALLEELQRV
													SAENKKLTEMLTVMGESYNALRSQLLDYMSKNPEKELSPISKKRKSESSNNNNTNTNSNN
													IINGAVNGNSESSSSDGESCKKPREETIKAKISRAYVRTEASDTTSLVVKDGYQWRKYGQ
													KVTRDNPCPRAYFKCSFAPSCPVKKKVQRSVEDQSILVATYEGEHNHSHPSQIEATSGSN
													RCMTLGSVPCSTSLASSGPTITLDLTKSKSSADTKSTKTRTETPEVRKFLVEQMASSLTK
													DPDFTKALAAAISGRILQHNSY
