# Supplementary material for: Characterization of the WRKY gene family reveals its contribution to the adaptability of almond (Prunus dulcis)
Source: PeerJ. 2022 Jul 4;10:e13491. doi: 10.7717/peerj.13491 (PMC9261925; doi:10.7717/peerj.13491)
Supplement: Supplemental Information 7 [file peerj-10-13491-s007.xlsx]

## Sheet: Sheet1
Segmental and tandem duplication events in almond WRKY genes
Segmental duplication			Tandem duplicate
Prudul26A020687P1	Prudul26A031374P1		Prudul26A002073P1	Prudul26A008567P1
Prudul26A007596P1	Prudul26A030807P1		Prudul26A011586P1	Prudul26A002073P1
Prudul26A007596P1	Prudul26A014175P1		Prudul26A004090P1	Prudul26A004090P2
Prudul26A021325P1	Prudul26A028617P1		Prudul26A005633P1	Prudul26A005633P2
Prudul26A019298P1	Prudul26A028617P1		Prudul26A013051P2	Prudul26A006215P1
Prudul26A005095P1	Prudul26A005633P1		Prudul26A013051P1	Prudul26A013051P2
Prudul26A013051P1	Prudul26A032520P1		Prudul26A017718P1	Prudul26A017718P2
Prudul26A012395P1	Prudul26A027240P1		Prudul26A023323P1	Prudul26A023323P2
Prudul26A019680P1	Prudul26A031546P1		Prudul26A024381P1	Prudul26A024381P2
Prudul26A023323P1	Prudul26A031546P1
Prudul26A001975P1	Prudul26A023213P1
Prudul26A011586P1	Prudul26A012059P1
Prudul26A019680P1	Prudul26A023323P1
Prudul26A005971P1	Prudul26A012168P1
Prudul26A022742P1	Prudul26A030043P1
Prudul26A027932P1	Prudul26A029053P1
Prudul26A017718P1	Prudul26A028388P1
Prudul26A001748P1	Prudul26A028388P1
Prudul26A019298P1	Prudul26A021325P1
Prudul26A014175P1	Prudul26A030807P1
Prudul26A001748P1	Prudul26A017718P1
Prudul26A011586P1	Prudul26A023213P1
Prudul26A004090P1	Prudul26A028352P1
Prudul26A009578P1	Prudul26A030389P1

## Sheet: Sheet2
Prudul26A000002P1	Prudul26A020703P1	#N/A	#N/A	Prudul26A015786P1
Prudul26A000007P1	Prudul26A000007P2	#N/A	#N/A	Prudul26A020687P1
Prudul26A000009P1	Prudul26A000009P2	#N/A	#N/A	Prudul26A007596P1
Prudul26A000017P1	Prudul26A000017P2	#N/A	#N/A	Prudul26A028617P1
Prudul26A000020P1	Prudul26A000020P2	#N/A	#N/A	Prudul26A005095P1
Prudul26A000023P1	Prudul26A000023P2	#N/A	#N/A	Prudul26A007647P1
Prudul26A000029P1	Prudul26A000029P2	#N/A	#N/A	Prudul26A013051P1
Prudul26A000031P1	Prudul26A016391P1	#N/A	#N/A	Prudul26A013051P2
Prudul26A026223P1	Prudul26A000031P1	#N/A	#N/A	Prudul26A006215P1
Prudul26A000036P1	Prudul26A010958P1	#N/A	#N/A	Prudul26A001657P1
Prudul26A000046P1	Prudul26A000046P2	#N/A	#N/A	Prudul26A027240P1
Prudul26A000046P2	Prudul26A000046P3	#N/A	#N/A	Prudul26A024381P1
Prudul26A000052P1	Prudul26A000052P2	#N/A	#N/A	Prudul26A024381P2
Prudul26A000057P1	Prudul26A000057P2	#N/A	#N/A	Prudul26A015240P1
Prudul26A000060P1	Prudul26A000060P2	#N/A	#N/A	Prudul26A013566P1
Prudul26A000081P1	Prudul26A000082P1	#N/A	#N/A	Prudul26A031546P1
Prudul26A000091P1	Prudul26A000091P2	#N/A	#N/A	Prudul26A020675P1
Prudul26A000094P1	Prudul26A000094P2	#N/A	#N/A	Prudul26A001975P1
Prudul26A000094P2	Prudul26A000094P3	#N/A	#N/A	Prudul26A022804P1
Prudul26A000098P1	Prudul26A000098P2	#N/A	#N/A	Prudul26A017436P1
Prudul26A009528P2	Prudul26A000102P1	#N/A	#N/A	Prudul26A012059P1
Prudul26A012136P1	Prudul26A000114P1	#N/A	#N/A	Prudul26A019680P1
Prudul26A000118P1	Prudul26A000118P2	#N/A	#N/A	Prudul26A006177P1
Prudul26A000120P1	Prudul26A000120P2	#N/A	#N/A	Prudul26A031374P1
Prudul26A009314P1	Prudul26A000126P1	#N/A	#N/A	Prudul26A032520P1
Prudul26A000129P1	Prudul26A000129P2	#N/A	#N/A	Prudul26A005971P1
Prudul26A000134P1	Prudul26A000134P2	#N/A	#N/A	Prudul26A022742P1
Prudul26A000137P1	Prudul26A000137P2	#N/A	#N/A	Prudul26A029053P1
Prudul26A000139P1	Prudul26A000139P2	#N/A	#N/A	Prudul26A028388P1
Prudul26A000146P1	Prudul26A000146P2	#N/A	#N/A	Prudul26A005633P1
Prudul26A000147P1	Prudul26A008096P1	#N/A	#N/A	Prudul26A005633P2
Prudul26A009317P1	Prudul26A000147P1	#N/A	#N/A	Prudul26A021325P1
Prudul26A000155P1	Prudul26A000155P2	#N/A	#N/A	Prudul26A030807P1
Prudul26A009353P1	Prudul26A000158P1	#N/A	#N/A	Prudul26A017718P1
Prudul26A000158P1	Prudul26A024573P1	#N/A	#N/A	Prudul26A017718P2
Prudul26A000161P1	Prudul26A000161P2	#N/A	#N/A	Prudul26A012168P1
Prudul26A023467P1	Prudul26A000161P1	#N/A	#N/A	Prudul26A030043P1
Prudul26A000161P2	Prudul26A009281P1	#N/A	#N/A	Prudul26A030482P1
Prudul26A000170P1	Prudul26A000170P2	#N/A	#N/A	Prudul26A001748P1
Prudul26A009339P1	Prudul26A000170P1	#N/A	#N/A	Prudul26A027932P1
Prudul26A000172P1	Prudul26A032483P1	#N/A	#N/A	Prudul26A001568P1
Prudul26A000173P1	Prudul26A009082P1	#N/A	#N/A	Prudul26A023323P1
Prudul26A000177P1	Prudul26A014916P1	#N/A	#N/A	Prudul26A023323P2
Prudul26A000188P1	Prudul26A026146P1	#N/A	#N/A	Prudul26A023213P1
Prudul26A000191P1	Prudul26A000191P2	#N/A	#N/A	Prudul26A014175P1
Prudul26A000200P1	Prudul26A000200P2	#N/A	#N/A	Prudul26A019298P1
Prudul26A000202P1	Prudul26A000202P2	#N/A	#N/A	Prudul26A021799P1
Prudul26A000207P1	Prudul26A000207P2	#N/A	#N/A	Prudul26A028352P1
Prudul26A000214P1	Prudul26A000214P2	#N/A	#N/A	Prudul26A018032P1
Prudul26A000221P1	Prudul26A000221P2	#N/A	#N/A	Prudul26A012395P1
Prudul26A000221P2	Prudul26A000221P3	#N/A	#N/A	Prudul26A031132P1
Prudul26A009639P1	Prudul26A000228P1	#N/A	#N/A	Prudul26A027479P1
Prudul26A024608P1	Prudul26A000231P1	#N/A	#N/A	Prudul26A004090P1
Prudul26A009400P1	Prudul26A000237P1	#N/A	#N/A	Prudul26A004090P2
Prudul26A000239P1	Prudul26A000239P2	#N/A	#N/A	Prudul26A011586P1
Prudul26A000243P1	Prudul26A000244P1	#N/A	#N/A	Prudul26A002073P1
Prudul26A000250P1	Prudul26A000250P2	#N/A	#N/A	Prudul26A008567P1
Prudul26A005146P1	Prudul26A000253P1	#N/A	#N/A	Prudul26A030389P1
Prudul26A011504P1	Prudul26A000261P1	#N/A	#N/A	Prudul26A022589P1
Prudul26A024817P1	Prudul26A000262P1	#N/A	#N/A	Prudul26A030641P1
Prudul26A000268P1	Prudul26A000268P2	#N/A	#N/A	Prudul26A009578P1
Prudul26A000268P2	Prudul26A000268P3	#N/A	#N/A	Prudul26A023218P1
Prudul26A010982P3	Prudul26A000271P1	#N/A	#N/A
Prudul26A000275P1	Prudul26A000275P2	#N/A	#N/A
Prudul26A000278P1	Prudul26A000278P2	#N/A	#N/A
Prudul26A000281P1	Prudul26A000281P2	#N/A	#N/A
Prudul26A000281P2	Prudul26A000281P3	#N/A	#N/A
Prudul26A000286P1	Prudul26A028042P1	#N/A	#N/A
Prudul26A000290P1	Prudul26A000290P2	#N/A	#N/A
Prudul26A008982P1	Prudul26A000291P1	#N/A	#N/A
Prudul26A000301P1	Prudul26A000301P2	#N/A	#N/A
Prudul26A000301P2	Prudul26A028509P1	#N/A	#N/A
Prudul26A009718P1	Prudul26A000304P1	#N/A	#N/A
Prudul26A000311P1	Prudul26A000311P2	#N/A	#N/A
Prudul26A000315P1	Prudul26A000315P2	#N/A	#N/A
Prudul26A000315P2	Prudul26A000315P3	#N/A	#N/A
Prudul26A011613P1	Prudul26A000319P1	#N/A	#N/A
Prudul26A000319P1	Prudul26A026208P1	#N/A	#N/A
Prudul26A000332P1	Prudul26A023475P1	#N/A	#N/A
Prudul26A031547P1	Prudul26A000336P1	#N/A	#N/A
Prudul26A000341P1	Prudul26A000341P2	#N/A	#N/A
Prudul26A000350P1	Prudul26A000350P2	#N/A	#N/A
Prudul26A023854P1	Prudul26A000355P1	#N/A	#N/A
Prudul26A000358P1	Prudul26A000957P1	#N/A	#N/A
Prudul26A000368P1	Prudul26A000368P2	#N/A	#N/A
Prudul26A000368P2	Prudul26A000368P3	#N/A	#N/A
Prudul26A000370P1	Prudul26A000370P2	#N/A	#N/A
Prudul26A000371P1	Prudul26A025576P1	#N/A	#N/A
Prudul26A000376P1	Prudul26A032461P1	#N/A	#N/A
Prudul26A000377P1	Prudul26A026311P1	#N/A	#N/A
Prudul26A000380P1	Prudul26A000380P2	#N/A	#N/A
Prudul26A000385P1	Prudul26A002529P1	#N/A	#N/A
Prudul26A000395P1	Prudul26A000395P2	#N/A	#N/A
Prudul26A000395P2	Prudul26A000395P3	#N/A	#N/A
Prudul26A000399P1	Prudul26A000399P2	#N/A	#N/A
Prudul26A009814P2	Prudul26A000407P1	#N/A	#N/A
Prudul26A000407P1	Prudul26A028160P1	#N/A	#N/A
Prudul26A025930P1	Prudul26A000409P1	#N/A	#N/A
Prudul26A000411P1	Prudul26A000411P2	#N/A	#N/A
Prudul26A016051P1	Prudul26A000412P1	#N/A	#N/A
Prudul26A000413P1	Prudul26A000414P1	#N/A	#N/A
Prudul26A000419P1	Prudul26A000419P2	#N/A	#N/A
Prudul26A000422P1	Prudul26A000422P2	#N/A	#N/A
Prudul26A000431P1	Prudul26A000431P2	#N/A	#N/A
Prudul26A000431P2	Prudul26A000431P3	#N/A	#N/A
Prudul26A000433P1	Prudul26A000433P2	#N/A	#N/A
Prudul26A026119P1	Prudul26A000436P1	#N/A	#N/A
Prudul26A000458P1	Prudul26A000458P2	#N/A	#N/A
Prudul26A000465P1	Prudul26A000465P2	#N/A	#N/A
Prudul26A000470P1	Prudul26A000470P2	#N/A	#N/A
Prudul26A000470P2	Prudul26A000470P3	#N/A	#N/A
Prudul26A000471P1	Prudul26A023637P1	#N/A	#N/A
Prudul26A000473P1	Prudul26A025673P1	#N/A	#N/A
Prudul26A000484P1	Prudul26A000484P2	#N/A	#N/A
Prudul26A000484P2	Prudul26A000484P3	#N/A	#N/A
Prudul26A000485P1	Prudul26A007807P1	#N/A	#N/A
Prudul26A032420P1	Prudul26A000485P1	#N/A	#N/A
Prudul26A000495P1	Prudul26A000495P2	#N/A	#N/A
Prudul26A006779P2	Prudul26A000495P1	#N/A	#N/A
Prudul26A006013P2	Prudul26A000496P1	#N/A	#N/A
Prudul26A000499P1	Prudul26A000499P2	#N/A	#N/A
Prudul26A000501P1	Prudul26A009657P1	#N/A	#N/A
Prudul26A027810P1	Prudul26A000501P1	#N/A	#N/A
Prudul26A000503P1	Prudul26A000503P2	#N/A	#N/A
Prudul26A000505P1	Prudul26A000505P2	#N/A	#N/A
Prudul26A000507P1	Prudul26A000507P2	#N/A	#N/A
Prudul26A009737P1	Prudul26A000514P1	#N/A	#N/A
Prudul26A000516P1	Prudul26A032104P1	#N/A	#N/A
Prudul26A000518P1	Prudul26A000518P2	#N/A	#N/A
Prudul26A007898P1	Prudul26A000524P1	#N/A	#N/A
Prudul26A000550P1	Prudul26A026563P1	#N/A	#N/A
Prudul26A000556P1	Prudul26A000556P2	#N/A	#N/A
Prudul26A000574P1	Prudul26A000574P2	#N/A	#N/A
Prudul26A000578P1	Prudul26A000578P2	#N/A	#N/A
Prudul26A000581P1	Prudul26A025209P1	#N/A	#N/A
Prudul26A000586P1	Prudul26A010148P1	#N/A	#N/A
Prudul26A027053P1	Prudul26A000589P1	#N/A	#N/A
Prudul26A026408P1	Prudul26A000598P1	#N/A	#N/A
Prudul26A010073P1	Prudul26A000606P1	#N/A	#N/A
Prudul26A000606P1	Prudul26A032403P1	#N/A	#N/A
Prudul26A015764P1	Prudul26A000608P1	#N/A	#N/A
Prudul26A000613P1	Prudul26A000613P2	#N/A	#N/A
Prudul26A000622P1	Prudul26A000622P2	#N/A	#N/A
Prudul26A000622P2	Prudul26A000622P3	#N/A	#N/A
Prudul26A032187P1	Prudul26A000632P1	#N/A	#N/A
Prudul26A000643P1	Prudul26A007708P1	#N/A	#N/A
Prudul26A000651P1	Prudul26A000651P2	#N/A	#N/A
Prudul26A000652P1	Prudul26A024771P1	#N/A	#N/A
Prudul26A000654P1	Prudul26A011002P1	#N/A	#N/A
Prudul26A024721P1	Prudul26A000654P1	#N/A	#N/A
Prudul26A000657P1	Prudul26A000657P2	#N/A	#N/A
Prudul26A000657P2	Prudul26A000657P3	#N/A	#N/A
Prudul26A000657P3	Prudul26A024850P1	#N/A	#N/A
Prudul26A000664P1	Prudul26A000664P2	#N/A	#N/A
Prudul26A000666P1	Prudul26A000666P2	#N/A	#N/A
Prudul26A000670P1	Prudul26A009585P1	#N/A	#N/A
Prudul26A000673P1	Prudul26A028168P1	#N/A	#N/A
Prudul26A000676P1	Prudul26A000676P2	#N/A	#N/A
Prudul26A000684P1	Prudul26A000684P2	#N/A	#N/A
Prudul26A000686P1	Prudul26A000686P2	#N/A	#N/A
Prudul26A000687P1	Prudul26A022715P1	#N/A	#N/A
Prudul26A000697P1	Prudul26A022947P1	#N/A	#N/A
Prudul26A000699P1	Prudul26A000699P2	#N/A	#N/A
Prudul26A012321P1	Prudul26A000707P1	#N/A	#N/A
Prudul26A000709P1	Prudul26A000709P2	#N/A	#N/A
Prudul26A000709P2	Prudul26A028219P1	#N/A	#N/A
Prudul26A026457P1	Prudul26A000712P1	#N/A	#N/A
Prudul26A000714P1	Prudul26A024934P1	#N/A	#N/A
Prudul26A000718P1	Prudul26A000718P2	#N/A	#N/A
Prudul26A000719P1	Prudul26A028649P1	#N/A	#N/A
Prudul26A000722P1	Prudul26A000722P2	#N/A	#N/A
Prudul26A000725P1	Prudul26A000725P2	#N/A	#N/A
Prudul26A000725P2	Prudul26A000725P3	#N/A	#N/A
Prudul26A000733P1	Prudul26A000733P2	#N/A	#N/A
Prudul26A000736P1	Prudul26A000736P2	#N/A	#N/A
Prudul26A006460P1	Prudul26A000736P1	#N/A	#N/A
Prudul26A000739P1	Prudul26A002655P1	#N/A	#N/A
Prudul26A000744P1	Prudul26A000744P2	#N/A	#N/A
Prudul26A000750P1	Prudul26A000750P2	#N/A	#N/A
Prudul26A000750P2	Prudul26A000750P3	#N/A	#N/A
Prudul26A000762P1	Prudul26A000762P2	#N/A	#N/A
Prudul26A000762P2	Prudul26A000762P3	#N/A	#N/A
Prudul26A002634P1	Prudul26A000768P1	#N/A	#N/A
Prudul26A000772P1	Prudul26A032602P1	#N/A	#N/A
Prudul26A000776P1	Prudul26A004566P1	#N/A	#N/A
Prudul26A023176P2	Prudul26A000776P1	#N/A	#N/A
Prudul26A000777P1	Prudul26A026312P1	#N/A	#N/A
Prudul26A000783P1	Prudul26A000783P2	#N/A	#N/A
Prudul26A000785P1	Prudul26A000785P2	#N/A	#N/A
Prudul26A000787P1	Prudul26A000787P2	#N/A	#N/A
Prudul26A000788P1	Prudul26A023015P1	#N/A	#N/A
Prudul26A000790P1	Prudul26A000790P2	#N/A	#N/A
Prudul26A000793P1	Prudul26A000793P2	#N/A	#N/A
Prudul26A000797P1	Prudul26A000797P2	#N/A	#N/A
Prudul26A026709P1	Prudul26A000803P1	#N/A	#N/A
Prudul26A000807P1	Prudul26A019256P1	#N/A	#N/A
Prudul26A000814P1	Prudul26A005043P1	#N/A	#N/A
Prudul26A000817P1	Prudul26A000817P2	#N/A	#N/A
Prudul26A000825P1	Prudul26A000825P2	#N/A	#N/A
Prudul26A000829P1	Prudul26A000829P2	#N/A	#N/A
Prudul26A000832P1	Prudul26A029184P1	#N/A	#N/A
Prudul26A000836P1	Prudul26A000836P2	#N/A	#N/A
Prudul26A006641P1	Prudul26A000843P1	#N/A	#N/A
Prudul26A000847P1	Prudul26A000847P2	#N/A	#N/A
Prudul26A000851P1	Prudul26A000851P2	#N/A	#N/A
Prudul26A022843P1	Prudul26A000852P1	#N/A	#N/A
Prudul26A000862P1	Prudul26A000862P2	#N/A	#N/A
Prudul26A000866P1	Prudul26A000866P2	#N/A	#N/A
Prudul26A000868P1	Prudul26A012150P1	#N/A	#N/A
Prudul26A030920P1	Prudul26A000868P1	#N/A	#N/A
Prudul26A000870P1	Prudul26A000870P2	#N/A	#N/A
Prudul26A000878P1	Prudul26A000878P2	#N/A	#N/A
Prudul26A000882P1	Prudul26A000882P2	#N/A	#N/A
Prudul26A000887P1	Prudul26A000887P2	#N/A	#N/A
Prudul26A012005P1	Prudul26A000893P1	#N/A	#N/A
Prudul26A000899P1	Prudul26A000899P2	#N/A	#N/A
Prudul26A000899P2	Prudul26A000899P3	#N/A	#N/A
Prudul26A000903P1	Prudul26A000903P2	#N/A	#N/A
Prudul26A000909P1	Prudul26A000909P2	#N/A	#N/A
Prudul26A000912P1	Prudul26A000912P2	#N/A	#N/A
Prudul26A000927P1	Prudul26A000927P2	#N/A	#N/A
Prudul26A000933P1	Prudul26A000933P2	#N/A	#N/A
Prudul26A000946P1	Prudul26A000946P2	#N/A	#N/A
Prudul26A000959P1	Prudul26A000959P2	#N/A	#N/A
Prudul26A000960P1	Prudul26A012142P1	#N/A	#N/A
Prudul26A028936P1	Prudul26A000960P1	#N/A	#N/A
Prudul26A007469P1	Prudul26A000965P1	#N/A	#N/A
Prudul26A000965P1	Prudul26A026637P1	#N/A	#N/A
Prudul26A000966P1	Prudul26A015588P1	#N/A	#N/A
Prudul26A000974P1	Prudul26A000974P2	#N/A	#N/A
Prudul26A000974P2	Prudul26A000974P3	#N/A	#N/A
Prudul26A026509P1	Prudul26A000976P1	#N/A	#N/A
Prudul26A000985P1	Prudul26A000985P2	#N/A	#N/A
Prudul26A000985P2	Prudul26A014119P1	#N/A	#N/A
Prudul26A000990P1	Prudul26A014306P1	#N/A	#N/A
Prudul26A000996P1	Prudul26A002616P1	#N/A	#N/A
Prudul26A000997P1	Prudul26A024863P1	#N/A	#N/A
Prudul26A001002P1	Prudul26A001002P2	#N/A	#N/A
Prudul26A001005P1	Prudul26A001005P2	#N/A	#N/A
Prudul26A001007P1	Prudul26A017638P1	#N/A	#N/A
Prudul26A001011P1	Prudul26A001011P2	#N/A	#N/A
Prudul26A001016P1	Prudul26A001016P2	#N/A	#N/A
Prudul26A001280P1	Prudul26A001016P1	#N/A	#N/A
Prudul26A001023P1	Prudul26A001023P2	#N/A	#N/A
Prudul26A001036P1	Prudul26A001036P2	#N/A	#N/A
Prudul26A001038P1	Prudul26A007120P1	#N/A	#N/A
Prudul26A025189P1	Prudul26A001038P1	#N/A	#N/A
Prudul26A001045P1	Prudul26A001045P2	#N/A	#N/A
Prudul26A001046P1	Prudul26A010925P1	#N/A	#N/A
Prudul26A001050P1	Prudul26A001050P2	#N/A	#N/A
Prudul26A010783P1	Prudul26A001058P1	#N/A	#N/A
Prudul26A025235P1	Prudul26A001067P1	#N/A	#N/A
Prudul26A001070P1	Prudul26A001070P2	#N/A	#N/A
Prudul26A001076P1	Prudul26A001076P2	#N/A	#N/A
Prudul26A023284P3	Prudul26A001077P1	#N/A	#N/A
Prudul26A024886P1	Prudul26A001079P1	#N/A	#N/A
Prudul26A001083P1	Prudul26A001083P2	#N/A	#N/A
Prudul26A001101P1	Prudul26A001101P2	#N/A	#N/A
Prudul26A001101P2	Prudul26A001101P3	#N/A	#N/A
Prudul26A001103P1	Prudul26A001103P2	#N/A	#N/A
Prudul26A001105P1	Prudul26A001105P2	#N/A	#N/A
Prudul26A001112P1	Prudul26A001112P2	#N/A	#N/A
Prudul26A013941P1	Prudul26A001121P1	#N/A	#N/A
Prudul26A001121P1	Prudul26A023073P1	#N/A	#N/A
Prudul26A001127P1	Prudul26A001127P2	#N/A	#N/A
Prudul26A008356P1	Prudul26A001130P1	#N/A	#N/A
Prudul26A001132P1	Prudul26A001132P2	#N/A	#N/A
Prudul26A001136P1	Prudul26A001136P2	#N/A	#N/A
Prudul26A001146P1	Prudul26A001146P2	#N/A	#N/A
Prudul26A001148P1	Prudul26A001148P2	#N/A	#N/A
Prudul26A001151P1	Prudul26A001151P2	#N/A	#N/A
Prudul26A001157P1	Prudul26A001157P2	#N/A	#N/A
Prudul26A027212P1	Prudul26A001159P1	#N/A	#N/A
Prudul26A014695P1	Prudul26A001162P1	#N/A	#N/A
Prudul26A001174P1	Prudul26A001174P2	#N/A	#N/A
Prudul26A001174P2	Prudul26A001174P3	#N/A	#N/A
Prudul26A001177P1	Prudul26A001177P2	#N/A	#N/A
Prudul26A001182P1	Prudul26A001182P2	#N/A	#N/A
Prudul26A001182P2	Prudul26A001182P3	#N/A	#N/A
Prudul26A001187P1	Prudul26A001187P2	#N/A	#N/A
Prudul26A016458P1	Prudul26A001195P1	#N/A	#N/A
Prudul26A001195P1	Prudul26A024893P1	#N/A	#N/A
Prudul26A001198P1	Prudul26A001198P2	#N/A	#N/A
Prudul26A001201P1	Prudul26A001201P2	#N/A	#N/A
Prudul26A001201P2	Prudul26A001201P3	#N/A	#N/A
Prudul26A008380P2	Prudul26A001212P1	#N/A	#N/A
Prudul26A025463P1	Prudul26A001214P1	#N/A	#N/A
Prudul26A001218P1	Prudul26A001218P2	#N/A	#N/A
Prudul26A001221P1	Prudul26A008403P1	#N/A	#N/A
Prudul26A031886P1	Prudul26A001228P1	#N/A	#N/A
Prudul26A001232P1	Prudul26A001232P2	#N/A	#N/A
Prudul26A001232P2	Prudul26A001232P3	#N/A	#N/A
Prudul26A001234P1	Prudul26A001234P2	#N/A	#N/A
Prudul26A001240P1	Prudul26A001240P2	#N/A	#N/A
Prudul26A001240P2	Prudul26A014193P1	#N/A	#N/A
Prudul26A008401P1	Prudul26A001241P1	#N/A	#N/A
Prudul26A001241P1	Prudul26A027157P1	#N/A	#N/A
Prudul26A001244P1	Prudul26A001244P2	#N/A	#N/A
Prudul26A001249P1	Prudul26A001249P2	#N/A	#N/A
Prudul26A001249P2	Prudul26A001249P3	#N/A	#N/A
Prudul26A027286P1	Prudul26A001255P1	#N/A	#N/A
Prudul26A001259P1	Prudul26A001259P2	#N/A	#N/A
Prudul26A009094P1	Prudul26A001259P1	#N/A	#N/A
Prudul26A001264P1	Prudul26A001264P2	#N/A	#N/A
Prudul26A001270P1	Prudul26A001270P2	#N/A	#N/A
Prudul26A001274P1	Prudul26A025117P1	#N/A	#N/A
Prudul26A001276P1	Prudul26A001276P2	#N/A	#N/A
Prudul26A027294P1	Prudul26A001280P1	#N/A	#N/A
Prudul26A001282P1	Prudul26A001282P2	#N/A	#N/A
Prudul26A001282P2	Prudul26A015202P1	#N/A	#N/A
Prudul26A001288P1	Prudul26A001288P2	#N/A	#N/A
Prudul26A023012P1	Prudul26A001291P1	#N/A	#N/A
Prudul26A001299P1	Prudul26A005240P1	#N/A	#N/A
Prudul26A001307P1	Prudul26A024873P1	#N/A	#N/A
Prudul26A027886P1	Prudul26A001307P1	#N/A	#N/A
Prudul26A001318P1	Prudul26A001318P2	#N/A	#N/A
Prudul26A001322P1	Prudul26A032335P1	#N/A	#N/A
Prudul26A001323P1	Prudul26A008490P1	#N/A	#N/A
Prudul26A027141P1	Prudul26A001323P1	#N/A	#N/A
Prudul26A001331P1	Prudul26A001331P2	#N/A	#N/A
Prudul26A010702P2	Prudul26A001333P1	#N/A	#N/A
Prudul26A001337P1	Prudul26A020055P1	#N/A	#N/A
Prudul26A001338P1	Prudul26A027018P1	#N/A	#N/A
Prudul26A001339P1	Prudul26A026522P1	#N/A	#N/A
Prudul26A001342P1	Prudul26A001342P2	#N/A	#N/A
Prudul26A001344P1	Prudul26A025754P1	#N/A	#N/A
Prudul26A028662P2	Prudul26A001346P1	#N/A	#N/A
Prudul26A001348P1	Prudul26A001348P2	#N/A	#N/A
Prudul26A001358P1	Prudul26A001358P2	#N/A	#N/A
Prudul26A001365P1	Prudul26A001365P2	#N/A	#N/A
Prudul26A001367P1	Prudul26A001367P2	#N/A	#N/A
Prudul26A005428P1	Prudul26A001369P1	#N/A	#N/A
Prudul26A001371P1	Prudul26A030723P1	#N/A	#N/A
Prudul26A001374P1	Prudul26A010651P1	#N/A	#N/A
Prudul26A001376P1	Prudul26A001376P2	#N/A	#N/A
Prudul26A001396P1	Prudul26A008314P1	#N/A	#N/A
Prudul26A001398P1	Prudul26A001398P2	#N/A	#N/A
Prudul26A001401P1	Prudul26A001401P2	#N/A	#N/A
Prudul26A001401P2	Prudul26A001401P3	#N/A	#N/A
Prudul26A001409P1	Prudul26A001409P2	#N/A	#N/A
Prudul26A001409P2	Prudul26A001409P3	#N/A	#N/A
Prudul26A001412P1	Prudul26A001412P2	#N/A	#N/A
Prudul26A001418P1	Prudul26A023196P1	#N/A	#N/A
Prudul26A008584P1	Prudul26A001419P1	#N/A	#N/A
Prudul26A001421P1	Prudul26A001421P2	#N/A	#N/A
Prudul26A025102P1	Prudul26A001421P1	#N/A	#N/A
Prudul26A001421P2	Prudul26A022117P1	#N/A	#N/A
Prudul26A010478P1	Prudul26A001423P1	#N/A	#N/A
Prudul26A001425P1	Prudul26A001425P2	#N/A	#N/A
Prudul26A001426P1	Prudul26A008502P1	#N/A	#N/A
Prudul26A001428P1	Prudul26A001428P2	#N/A	#N/A
Prudul26A001434P1	Prudul26A001434P2	#N/A	#N/A
Prudul26A010886P1	Prudul26A001437P1	#N/A	#N/A
Prudul26A001440P1	Prudul26A001440P2	#N/A	#N/A
Prudul26A001442P1	Prudul26A015305P1	#N/A	#N/A
Prudul26A008928P1	Prudul26A001452P1	#N/A	#N/A
Prudul26A008627P1	Prudul26A001454P1	#N/A	#N/A
Prudul26A001456P1	Prudul26A001456P2	#N/A	#N/A
Prudul26A001459P1	Prudul26A001459P2	#N/A	#N/A
Prudul26A001463P1	Prudul26A001463P2	#N/A	#N/A
Prudul26A001463P2	Prudul26A001463P3	#N/A	#N/A
Prudul26A001468P1	Prudul26A022418P1	#N/A	#N/A
Prudul26A001475P1	Prudul26A001475P2	#N/A	#N/A
Prudul26A001475P2	Prudul26A012358P1	#N/A	#N/A
Prudul26A001477P1	Prudul26A001477P2	#N/A	#N/A
Prudul26A001482P1	Prudul26A001482P2	#N/A	#N/A
Prudul26A001486P1	Prudul26A001486P2	#N/A	#N/A
Prudul26A001493P1	Prudul26A001493P2	#N/A	#N/A
Prudul26A001495P1	Prudul26A001495P2	#N/A	#N/A
Prudul26A001498P1	Prudul26A001498P2	#N/A	#N/A
Prudul26A001500P1	Prudul26A001500P2	#N/A	#N/A
Prudul26A001500P2	Prudul26A021695P1	#N/A	#N/A
Prudul26A001501P1	Prudul26A026885P1	#N/A	#N/A
Prudul26A001505P1	Prudul26A001505P2	#N/A	#N/A
Prudul26A001512P1	Prudul26A001512P2	#N/A	#N/A
Prudul26A001512P2	Prudul26A001512P3	#N/A	#N/A
Prudul26A001513P1	Prudul26A024935P1	#N/A	#N/A
Prudul26A001517P1	Prudul26A001517P2	#N/A	#N/A
Prudul26A001523P1	Prudul26A001523P2	#N/A	#N/A
Prudul26A001523P2	Prudul26A001523P3	#N/A	#N/A
Prudul26A001540P1	Prudul26A001540P2	#N/A	#N/A
Prudul26A001547P1	Prudul26A001547P2	#N/A	#N/A
Prudul26A001552P1	Prudul26A001552P2	#N/A	#N/A
Prudul26A025028P1	Prudul26A001553P1	#N/A	#N/A
Prudul26A001556P1	Prudul26A001556P2	#N/A	#N/A
Prudul26A014638P1	Prudul26A001556P1	#N/A	#N/A
Prudul26A009545P1	Prudul26A001558P1	#N/A	#N/A
Prudul26A001558P1	Prudul26A025687P1	#N/A	#N/A
Prudul26A001560P1	Prudul26A001560P2	#N/A	#N/A
Prudul26A001567P1	Prudul26A007371P1	#N/A	#N/A
Prudul26A001573P1	Prudul26A001573P2	#N/A	#N/A
Prudul26A001573P2	Prudul26A001573P3	#N/A	#N/A
Prudul26A001579P1	Prudul26A001579P2	#N/A	#N/A
Prudul26A001586P1	Prudul26A008969P1	#N/A	#N/A
Prudul26A005813P1	Prudul26A001593P1	#N/A	#N/A
Prudul26A001600P1	Prudul26A001600P2	#N/A	#N/A
Prudul26A001602P1	Prudul26A010870P1	#N/A	#N/A
Prudul26A022263P1	Prudul26A001602P1	#N/A	#N/A
Prudul26A001605P1	Prudul26A030981P1	#N/A	#N/A
Prudul26A001610P1	Prudul26A001610P2	#N/A	#N/A
Prudul26A001615P1	Prudul26A001615P2	#N/A	#N/A
Prudul26A001615P2	Prudul26A001615P3	#N/A	#N/A
Prudul26A001619P1	Prudul26A001619P2	#N/A	#N/A
Prudul26A001624P1	Prudul26A001624P2	#N/A	#N/A
Prudul26A009744P1	Prudul26A001624P1	#N/A	#N/A
Prudul26A001628P1	Prudul26A001628P2	#N/A	#N/A
Prudul26A001632P1	Prudul26A001632P2	#N/A	#N/A
Prudul26A025940P1	Prudul26A001635P1	#N/A	#N/A
Prudul26A001644P1	Prudul26A001644P2	#N/A	#N/A
Prudul26A001644P2	Prudul26A001644P3	#N/A	#N/A
Prudul26A001646P1	Prudul26A001646P2	#N/A	#N/A
Prudul26A001650P1	Prudul26A001650P2	#N/A	#N/A
Prudul26A001650P2	Prudul26A001650P3	#N/A	#N/A
Prudul26A001653P1	Prudul26A027619P1	#N/A	#N/A
Prudul26A001660P1	Prudul26A001660P2	#N/A	#N/A
Prudul26A001660P2	Prudul26A001660P3	#N/A	#N/A
Prudul26A001663P1	Prudul26A001663P2	#N/A	#N/A
Prudul26A012206P1	Prudul26A001664P1	#N/A	#N/A
Prudul26A001673P1	Prudul26A001673P2	#N/A	#N/A
Prudul26A001678P1	Prudul26A001678P2	#N/A	#N/A
Prudul26A001685P1	Prudul26A001685P2	#N/A	#N/A
Prudul26A001685P2	Prudul26A001685P3	#N/A	#N/A
Prudul26A001687P1	Prudul26A001687P2	#N/A	#N/A
Prudul26A001687P2	Prudul26A014770P1	#N/A	#N/A
Prudul26A001697P1	Prudul26A001697P2	#N/A	#N/A
Prudul26A007997P1	Prudul26A001702P1	#N/A	#N/A
Prudul26A001708P1	Prudul26A001708P2	#N/A	#N/A
Prudul26A001708P2	Prudul26A001708P3	#N/A	#N/A
Prudul26A001710P1	Prudul26A001710P2	#N/A	#N/A
Prudul26A001718P1	Prudul26A001718P2	#N/A	#N/A
Prudul26A001718P2	Prudul26A001718P3	#N/A	#N/A
Prudul26A019877P1	Prudul26A001735P1	#N/A	#N/A
Prudul26A001735P1	Prudul26A025302P1	#N/A	#N/A
Prudul26A001739P1	Prudul26A004442P1	#N/A	#N/A
Prudul26A009531P1	Prudul26A001742P1	#N/A	#N/A
Prudul26A001742P1	Prudul26A009531P2	#N/A	#N/A
Prudul26A001745P1	Prudul26A025723P1	#N/A	#N/A
Prudul26A001747P1	Prudul26A001747P2	#N/A	#N/A
Prudul26A001749P1	Prudul26A008849P1	#N/A	#N/A
Prudul26A027753P1	Prudul26A001749P1	#N/A	#N/A
Prudul26A008861P1	Prudul26A001751P1	#N/A	#N/A
Prudul26A001756P1	Prudul26A025822P1	#N/A	#N/A
Prudul26A011269P1	Prudul26A001762P1	#N/A	#N/A
Prudul26A001767P1	Prudul26A001767P2	#N/A	#N/A
Prudul26A023639P1	Prudul26A001773P1	#N/A	#N/A
Prudul26A001775P1	Prudul26A001775P2	#N/A	#N/A
Prudul26A001777P1	Prudul26A001777P2	#N/A	#N/A
Prudul26A001784P1	Prudul26A023384P1	#N/A	#N/A
Prudul26A001789P1	Prudul26A001789P2	#N/A	#N/A
Prudul26A001793P1	Prudul26A001793P2	#N/A	#N/A
Prudul26A011767P1	Prudul26A001797P1	#N/A	#N/A
Prudul26A001802P1	Prudul26A027616P1	#N/A	#N/A
Prudul26A009178P1	Prudul26A001804P1	#N/A	#N/A
Prudul26A001808P1	Prudul26A022875P1	#N/A	#N/A
Prudul26A001814P1	Prudul26A001814P2	#N/A	#N/A
Prudul26A001819P1	Prudul26A001819P2	#N/A	#N/A
Prudul26A001824P1	Prudul26A001824P2	#N/A	#N/A
Prudul26A001824P2	Prudul26A001824P3	#N/A	#N/A
Prudul26A001840P1	Prudul26A001840P2	#N/A	#N/A
Prudul26A001840P2	Prudul26A001840P3	#N/A	#N/A
Prudul26A001842P1	Prudul26A001842P2	#N/A	#N/A
Prudul26A001852P1	Prudul26A001852P2	#N/A	#N/A
Prudul26A001852P2	Prudul26A001852P3	#N/A	#N/A
Prudul26A001861P1	Prudul26A001861P2	#N/A	#N/A
Prudul26A001869P1	Prudul26A001869P2	#N/A	#N/A
Prudul26A001872P1	Prudul26A001872P2	#N/A	#N/A
Prudul26A001882P1	Prudul26A001882P2	#N/A	#N/A
Prudul26A001892P1	Prudul26A001892P2	#N/A	#N/A
Prudul26A001899P1	Prudul26A001899P2	#N/A	#N/A
Prudul26A001899P2	Prudul26A009101P1	#N/A	#N/A
Prudul26A001904P1	Prudul26A001904P2	#N/A	#N/A
Prudul26A009271P1	Prudul26A001904P1	#N/A	#N/A
Prudul26A001906P1	Prudul26A001906P2	#N/A	#N/A
Prudul26A001910P1	Prudul26A001910P2	#N/A	#N/A
Prudul26A001912P1	Prudul26A001912P2	#N/A	#N/A
Prudul26A001916P1	Prudul26A001916P2	#N/A	#N/A
Prudul26A001919P1	Prudul26A001919P2	#N/A	#N/A
Prudul26A001934P1	Prudul26A001934P2	#N/A	#N/A
Prudul26A001934P2	Prudul26A001934P3	#N/A	#N/A
Prudul26A001943P1	Prudul26A001943P2	#N/A	#N/A
Prudul26A001945P1	Prudul26A001945P2	#N/A	#N/A
Prudul26A001950P1	Prudul26A001950P2	#N/A	#N/A
Prudul26A001950P2	Prudul26A001950P3	#N/A	#N/A
Prudul26A001954P1	Prudul26A025557P1	#N/A	#N/A
Prudul26A001956P1	Prudul26A001956P2	#N/A	#N/A
Prudul26A001959P1	Prudul26A001959P2	#N/A	#N/A
Prudul26A012546P1	Prudul26A001963P1	#N/A	#N/A
Prudul26A001964P1	Prudul26A009120P1	#N/A	#N/A
Prudul26A001968P1	Prudul26A001968P2	#N/A	#N/A
Prudul26A009007P1	Prudul26A001971P1	#N/A	#N/A
Prudul26A001991P1	Prudul26A001991P2	#N/A	#N/A
Prudul26A001991P2	Prudul26A001991P3	#N/A	#N/A
Prudul26A001995P1	Prudul26A015259P1	#N/A	#N/A
Prudul26A032133P2	Prudul26A001995P1	#N/A	#N/A
Prudul26A002001P1	Prudul26A002001P2	#N/A	#N/A
Prudul26A002004P1	Prudul26A002004P2	#N/A	#N/A
Prudul26A002011P1	Prudul26A002011P2	#N/A	#N/A
Prudul26A002013P1	Prudul26A002013P2	#N/A	#N/A
Prudul26A002017P1	Prudul26A002017P2	#N/A	#N/A
Prudul26A002019P1	Prudul26A002019P2	#N/A	#N/A
Prudul26A011532P1	Prudul26A002024P1	#N/A	#N/A
Prudul26A011802P2	Prudul26A002028P1	#N/A	#N/A
Prudul26A025695P1	Prudul26A002033P1	#N/A	#N/A
Prudul26A002040P1	Prudul26A002040P2	#N/A	#N/A
Prudul26A031297P1	Prudul26A002047P1	#N/A	#N/A
Prudul26A002050P1	Prudul26A002050P2	#N/A	#N/A
Prudul26A002052P1	Prudul26A002052P2	#N/A	#N/A
Prudul26A002056P1	Prudul26A002056P2	#N/A	#N/A
Prudul26A002056P2	Prudul26A002056P3	#N/A	#N/A
Prudul26A006996P1	Prudul26A002058P1	#N/A	#N/A
Prudul26A002061P1	Prudul26A002061P2	#N/A	#N/A
Prudul26A030993P1	Prudul26A002061P1	#N/A	#N/A
Prudul26A002067P1	Prudul26A002067P2	#N/A	#N/A
Prudul26A002070P1	Prudul26A002070P2	#N/A	#N/A
Prudul26A002073P1	Prudul26A008567P1	Prudul26A002073P1	Prudul26A008567P1
Prudul26A011586P1	Prudul26A002073P1	Prudul26A011586P1	Prudul26A002073P1
Prudul26A002075P1	Prudul26A002075P2	#N/A	#N/A
Prudul26A002076P1	Prudul26A009819P1	#N/A	#N/A
Prudul26A026418P1	Prudul26A002076P1	#N/A	#N/A
Prudul26A011005P1	Prudul26A002079P1	#N/A	#N/A
Prudul26A002082P1	Prudul26A002082P2	#N/A	#N/A
Prudul26A002093P1	Prudul26A002093P2	#N/A	#N/A
Prudul26A002095P1	Prudul26A022062P1	#N/A	#N/A
Prudul26A002097P1	Prudul26A002097P2	#N/A	#N/A
Prudul26A002102P1	Prudul26A002102P2	#N/A	#N/A
Prudul26A002103P1	Prudul26A028069P1	#N/A	#N/A
Prudul26A002105P1	Prudul26A027683P1	#N/A	#N/A
Prudul26A002111P1	Prudul26A002111P2	#N/A	#N/A
Prudul26A013950P1	Prudul26A002111P1	#N/A	#N/A
Prudul26A002119P1	Prudul26A026330P1	#N/A	#N/A
Prudul26A002120P1	Prudul26A024841P1	#N/A	#N/A
Prudul26A002123P1	Prudul26A002123P2	#N/A	#N/A
Prudul26A002124P1	Prudul26A030494P1	#N/A	#N/A
Prudul26A002125P1	Prudul26A004694P1	#N/A	#N/A
Prudul26A002137P1	Prudul26A021889P1	#N/A	#N/A
Prudul26A002139P1	Prudul26A002139P2	#N/A	#N/A
Prudul26A002144P1	Prudul26A002144P2	#N/A	#N/A
Prudul26A002150P1	Prudul26A002150P2	#N/A	#N/A
Prudul26A002153P1	Prudul26A014302P1	#N/A	#N/A
Prudul26A028464P1	Prudul26A002153P1	#N/A	#N/A
Prudul26A002155P1	Prudul26A002155P2	#N/A	#N/A
Prudul26A009749P3	Prudul26A002157P1	#N/A	#N/A
Prudul26A002162P1	Prudul26A002162P2	#N/A	#N/A
Prudul26A002174P1	Prudul26A002174P2	#N/A	#N/A
Prudul26A002176P1	Prudul26A002176P2	#N/A	#N/A
Prudul26A002178P1	Prudul26A002178P2	#N/A	#N/A
Prudul26A032270P1	Prudul26A002179P1	#N/A	#N/A
Prudul26A009492P1	Prudul26A002180P1	#N/A	#N/A
Prudul26A002188P1	Prudul26A002188P2	#N/A	#N/A
Prudul26A009064P1	Prudul26A002193P1	#N/A	#N/A
Prudul26A002193P1	Prudul26A009296P1	#N/A	#N/A
Prudul26A002197P1	Prudul26A002197P2	#N/A	#N/A
Prudul26A002197P2	Prudul26A002197P3	#N/A	#N/A
Prudul26A023762P2	Prudul26A002199P1	#N/A	#N/A
Prudul26A002212P1	Prudul26A002212P2	#N/A	#N/A
Prudul26A002212P2	Prudul26A002212P3	#N/A	#N/A
Prudul26A002222P1	Prudul26A002222P2	#N/A	#N/A
Prudul26A026097P1	Prudul26A002227P1	#N/A	#N/A
Prudul26A002232P1	Prudul26A002232P2	#N/A	#N/A
Prudul26A002234P1	Prudul26A002234P2	#N/A	#N/A
Prudul26A011451P1	Prudul26A002241P1	#N/A	#N/A
Prudul26A002241P1	Prudul26A022611P1	#N/A	#N/A
Prudul26A002253P1	Prudul26A002253P2	#N/A	#N/A
Prudul26A002253P2	Prudul26A002253P3	#N/A	#N/A
Prudul26A002255P1	Prudul26A011457P1	#N/A	#N/A
Prudul26A002262P1	Prudul26A002262P2	#N/A	#N/A
Prudul26A027966P1	Prudul26A002264P1	#N/A	#N/A
Prudul26A002267P1	Prudul26A002267P2	#N/A	#N/A
Prudul26A002270P1	Prudul26A002270P2	#N/A	#N/A
Prudul26A002270P2	Prudul26A002270P3	#N/A	#N/A
Prudul26A002276P1	Prudul26A002276P2	#N/A	#N/A
Prudul26A014190P1	Prudul26A002276P1	#N/A	#N/A
Prudul26A002276P2	Prudul26A002276P3	#N/A	#N/A
Prudul26A002278P1	Prudul26A002278P2	#N/A	#N/A
Prudul26A002295P1	Prudul26A002295P2	#N/A	#N/A
Prudul26A002301P1	Prudul26A030207P1	#N/A	#N/A
Prudul26A016477P1	Prudul26A002308P1	#N/A	#N/A
Prudul26A002310P1	Prudul26A002310P2	#N/A	#N/A
Prudul26A002314P1	Prudul26A011836P1	#N/A	#N/A
Prudul26A002319P1	Prudul26A002319P2	#N/A	#N/A
Prudul26A002321P1	Prudul26A002321P2	#N/A	#N/A
Prudul26A002323P1	Prudul26A002323P2	#N/A	#N/A
Prudul26A002332P1	Prudul26A002332P2	#N/A	#N/A
Prudul26A002335P1	Prudul26A002335P2	#N/A	#N/A
Prudul26A002338P1	Prudul26A002338P2	#N/A	#N/A
Prudul26A002338P2	Prudul26A002338P3	#N/A	#N/A
Prudul26A002344P1	Prudul26A002344P2	#N/A	#N/A
Prudul26A002344P2	Prudul26A002344P3	#N/A	#N/A
Prudul26A011436P1	Prudul26A002345P1	#N/A	#N/A
Prudul26A002350P1	Prudul26A002350P2	#N/A	#N/A
Prudul26A002360P1	Prudul26A002360P2	#N/A	#N/A
Prudul26A029323P1	Prudul26A002360P1	#N/A	#N/A
Prudul26A002360P2	Prudul26A002360P3	#N/A	#N/A
Prudul26A002362P1	Prudul26A026199P1	#N/A	#N/A
Prudul26A002364P1	Prudul26A002364P2	#N/A	#N/A
Prudul26A022347P1	Prudul26A002365P1	#N/A	#N/A
Prudul26A002367P1	Prudul26A002367P2	#N/A	#N/A
Prudul26A002369P1	Prudul26A002369P2	#N/A	#N/A
Prudul26A002372P1	Prudul26A007201P1	#N/A	#N/A
Prudul26A025404P2	Prudul26A002373P1	#N/A	#N/A
Prudul26A002377P1	Prudul26A027779P1	#N/A	#N/A
Prudul26A016000P2	Prudul26A002378P1	#N/A	#N/A
Prudul26A002381P1	Prudul26A002381P2	#N/A	#N/A
Prudul26A002392P1	Prudul26A002392P2	#N/A	#N/A
Prudul26A002392P2	Prudul26A002392P3	#N/A	#N/A
Prudul26A002393P1	Prudul26A024223P1	#N/A	#N/A
Prudul26A002395P1	Prudul26A011825P1	#N/A	#N/A
Prudul26A002401P1	Prudul26A002401P2	#N/A	#N/A
Prudul26A002401P2	Prudul26A002401P3	#N/A	#N/A
Prudul26A002412P1	Prudul26A002412P2	#N/A	#N/A
Prudul26A002412P2	Prudul26A002412P3	#N/A	#N/A
Prudul26A002416P1	Prudul26A002416P2	#N/A	#N/A
Prudul26A002416P2	Prudul26A002416P3	#N/A	#N/A
Prudul26A002419P1	Prudul26A011863P1	#N/A	#N/A
Prudul26A002424P1	Prudul26A002424P2	#N/A	#N/A
Prudul26A021343P1	Prudul26A002427P1	#N/A	#N/A
Prudul26A002431P1	Prudul26A002431P2	#N/A	#N/A
Prudul26A002433P1	Prudul26A002433P2	#N/A	#N/A
Prudul26A012351P1	Prudul26A002433P1	#N/A	#N/A
Prudul26A030829P1	Prudul26A002436P1	#N/A	#N/A
Prudul26A002439P1	Prudul26A002439P2	#N/A	#N/A
Prudul26A002444P1	Prudul26A002444P2	#N/A	#N/A
Prudul26A002446P1	Prudul26A002446P2	#N/A	#N/A
Prudul26A030036P1	Prudul26A002450P1	#N/A	#N/A
Prudul26A002453P1	Prudul26A002453P2	#N/A	#N/A
Prudul26A002453P2	Prudul26A002453P3	#N/A	#N/A
Prudul26A002455P1	Prudul26A002455P2	#N/A	#N/A
Prudul26A002459P1	Prudul26A002459P2	#N/A	#N/A
Prudul26A002466P1	Prudul26A011398P1	#N/A	#N/A
Prudul26A025548P1	Prudul26A002466P1	#N/A	#N/A
Prudul26A002470P1	Prudul26A002470P2	#N/A	#N/A
Prudul26A002475P1	Prudul26A002475P2	#N/A	#N/A
Prudul26A002480P1	Prudul26A002480P2	#N/A	#N/A
Prudul26A028351P1	Prudul26A002480P1	#N/A	#N/A
Prudul26A011902P1	Prudul26A002484P1	#N/A	#N/A
Prudul26A002487P1	Prudul26A002487P2	#N/A	#N/A
Prudul26A029434P1	Prudul26A002488P1	#N/A	#N/A
Prudul26A002495P1	Prudul26A002495P2	#N/A	#N/A
Prudul26A002495P2	Prudul26A002495P3	#N/A	#N/A
Prudul26A002500P1	Prudul26A002500P2	#N/A	#N/A
Prudul26A002500P2	Prudul26A002500P3	#N/A	#N/A
Prudul26A002504P1	Prudul26A002504P2	#N/A	#N/A
Prudul26A002508P1	Prudul26A002508P2	#N/A	#N/A
Prudul26A027569P1	Prudul26A002525P1	#N/A	#N/A
Prudul26A002529P1	Prudul26A011730P1	#N/A	#N/A
Prudul26A002531P1	Prudul26A028185P1	#N/A	#N/A
Prudul26A030458P1	Prudul26A002534P1	#N/A	#N/A
Prudul26A002548P1	Prudul26A002548P2	#N/A	#N/A
Prudul26A010513P1	Prudul26A002548P1	#N/A	#N/A
Prudul26A002548P2	Prudul26A002548P3	#N/A	#N/A
Prudul26A021271P1	Prudul26A002552P1	#N/A	#N/A
Prudul26A025683P1	Prudul26A002553P1	#N/A	#N/A
Prudul26A002561P1	Prudul26A002561P2	#N/A	#N/A
Prudul26A002564P1	Prudul26A002564P2	#N/A	#N/A
Prudul26A003948P1	Prudul26A002564P1	#N/A	#N/A
Prudul26A002564P2	Prudul26A002564P3	#N/A	#N/A
Prudul26A002567P1	Prudul26A002567P2	#N/A	#N/A
Prudul26A002582P1	Prudul26A002582P2	#N/A	#N/A
Prudul26A002592P1	Prudul26A028223P1	#N/A	#N/A
Prudul26A002593P1	Prudul26A023632P1	#N/A	#N/A
Prudul26A024134P1	Prudul26A002602P1	#N/A	#N/A
Prudul26A002605P1	Prudul26A002605P2	#N/A	#N/A
Prudul26A002608P1	Prudul26A002608P2	#N/A	#N/A
Prudul26A002608P2	Prudul26A007186P1	#N/A	#N/A
Prudul26A002609P1	Prudul26A027982P1	#N/A	#N/A
Prudul26A002612P1	Prudul26A027505P1	#N/A	#N/A
Prudul26A002615P1	Prudul26A002615P2	#N/A	#N/A
Prudul26A002615P2	Prudul26A002615P3	#N/A	#N/A
Prudul26A012340P1	Prudul26A002618P1	#N/A	#N/A
Prudul26A002620P1	Prudul26A002620P2	#N/A	#N/A
Prudul26A002622P1	Prudul26A002622P2	#N/A	#N/A
Prudul26A002630P1	Prudul26A016422P1	#N/A	#N/A
Prudul26A020145P1	Prudul26A002635P1	#N/A	#N/A
Prudul26A002641P1	Prudul26A020310P1	#N/A	#N/A
Prudul26A026813P1	Prudul26A002644P1	#N/A	#N/A
Prudul26A005016P1	Prudul26A002651P1	#N/A	#N/A
Prudul26A020133P1	Prudul26A002652P1	#N/A	#N/A
Prudul26A002654P1	Prudul26A009768P1	#N/A	#N/A
Prudul26A002657P1	Prudul26A002657P2	#N/A	#N/A
Prudul26A021144P1	Prudul26A002658P1	#N/A	#N/A
Prudul26A011690P1	Prudul26A002668P1	#N/A	#N/A
Prudul26A008602P1	Prudul26A002670P1	#N/A	#N/A
Prudul26A002670P1	Prudul26A026801P1	#N/A	#N/A
Prudul26A002675P1	Prudul26A002675P2	#N/A	#N/A
Prudul26A002691P1	Prudul26A002691P2	#N/A	#N/A
Prudul26A002695P1	Prudul26A002695P2	#N/A	#N/A
Prudul26A002698P1	Prudul26A002698P2	#N/A	#N/A
Prudul26A002700P1	Prudul26A002700P2	#N/A	#N/A
Prudul26A002702P1	Prudul26A002702P2	#N/A	#N/A
Prudul26A002705P1	Prudul26A028416P1	#N/A	#N/A
Prudul26A002706P1	Prudul26A029537P1	#N/A	#N/A
Prudul26A019295P1	Prudul26A002707P1	#N/A	#N/A
Prudul26A016286P1	Prudul26A002708P1	#N/A	#N/A
Prudul26A002712P1	Prudul26A002712P2	#N/A	#N/A
Prudul26A002712P2	Prudul26A002712P3	#N/A	#N/A
Prudul26A002735P1	Prudul26A002735P2	#N/A	#N/A
Prudul26A012160P1	Prudul26A002742P1	#N/A	#N/A
Prudul26A012214P1	Prudul26A002747P1	#N/A	#N/A
Prudul26A002747P1	Prudul26A021342P1	#N/A	#N/A
Prudul26A002752P1	Prudul26A002752P2	#N/A	#N/A
Prudul26A002752P2	Prudul26A002752P3	#N/A	#N/A
Prudul26A002756P1	Prudul26A002756P2	#N/A	#N/A
Prudul26A002756P2	Prudul26A002756P3	#N/A	#N/A
Prudul26A002761P1	Prudul26A002761P2	#N/A	#N/A
Prudul26A006279P1	Prudul26A002761P1	#N/A	#N/A
Prudul26A002761P2	Prudul26A002761P3	#N/A	#N/A
Prudul26A011958P1	Prudul26A002762P1	#N/A	#N/A
Prudul26A002771P1	Prudul26A026092P1	#N/A	#N/A
Prudul26A002775P1	Prudul26A002775P2	#N/A	#N/A
Prudul26A002779P1	Prudul26A002779P2	#N/A	#N/A
Prudul26A002784P1	Prudul26A028843P1	#N/A	#N/A
Prudul26A002789P1	Prudul26A002789P2	#N/A	#N/A
Prudul26A002796P1	Prudul26A002796P2	#N/A	#N/A
Prudul26A002799P1	Prudul26A002799P2	#N/A	#N/A
Prudul26A002802P1	Prudul26A002802P2	#N/A	#N/A
Prudul26A002802P2	Prudul26A002802P3	#N/A	#N/A
Prudul26A002811P1	Prudul26A002811P2	#N/A	#N/A
Prudul26A002814P1	Prudul26A002814P2	#N/A	#N/A
Prudul26A002817P1	Prudul26A009581P1	#N/A	#N/A
Prudul26A002824P1	Prudul26A028706P1	#N/A	#N/A
Prudul26A014317P1	Prudul26A002830P1	#N/A	#N/A
Prudul26A002832P1	Prudul26A002832P2	#N/A	#N/A
Prudul26A002848P1	Prudul26A002848P2	#N/A	#N/A
Prudul26A002852P1	Prudul26A002852P2	#N/A	#N/A
Prudul26A002857P1	Prudul26A002857P2	#N/A	#N/A
Prudul26A002859P1	Prudul26A002859P2	#N/A	#N/A
Prudul26A002860P1	Prudul26A027148P1	#N/A	#N/A
Prudul26A002863P1	Prudul26A002863P2	#N/A	#N/A
Prudul26A002866P1	Prudul26A004388P1	#N/A	#N/A
Prudul26A002877P1	Prudul26A002877P2	#N/A	#N/A
Prudul26A002885P1	Prudul26A002885P2	#N/A	#N/A
Prudul26A028487P1	Prudul26A002889P1	#N/A	#N/A
Prudul26A026063P1	Prudul26A002896P1	#N/A	#N/A
Prudul26A002899P1	Prudul26A002899P2	#N/A	#N/A
Prudul26A002899P2	Prudul26A002899P3	#N/A	#N/A
Prudul26A002901P1	Prudul26A002901P2	#N/A	#N/A
Prudul26A002912P1	Prudul26A002912P2	#N/A	#N/A
Prudul26A002912P2	Prudul26A010713P1	#N/A	#N/A
Prudul26A002917P1	Prudul26A002917P2	#N/A	#N/A
Prudul26A002917P2	Prudul26A013705P1	#N/A	#N/A
Prudul26A002920P1	Prudul26A002920P2	#N/A	#N/A
Prudul26A002922P1	Prudul26A010033P1	#N/A	#N/A
Prudul26A002928P1	Prudul26A002928P2	#N/A	#N/A
Prudul26A002932P1	Prudul26A002932P2	#N/A	#N/A
Prudul26A002936P1	Prudul26A002936P2	#N/A	#N/A
Prudul26A002940P1	Prudul26A002940P2	#N/A	#N/A
Prudul26A002940P2	Prudul26A002940P3	#N/A	#N/A
Prudul26A002948P1	Prudul26A002948P2	#N/A	#N/A
Prudul26A002948P2	Prudul26A002948P3	#N/A	#N/A
Prudul26A002955P1	Prudul26A002955P2	#N/A	#N/A
Prudul26A002966P1	Prudul26A012405P1	#N/A	#N/A
Prudul26A008350P1	Prudul26A002971P1	#N/A	#N/A
Prudul26A002971P1	Prudul26A027177P1	#N/A	#N/A
Prudul26A002976P1	Prudul26A002976P2	#N/A	#N/A
Prudul26A002978P1	Prudul26A002978P2	#N/A	#N/A
Prudul26A016645P1	Prudul26A002983P1	#N/A	#N/A
Prudul26A002986P1	Prudul26A002986P2	#N/A	#N/A
Prudul26A002999P1	Prudul26A002999P2	#N/A	#N/A
Prudul26A020697P2	Prudul26A003003P1	#N/A	#N/A
Prudul26A003009P1	Prudul26A003009P2	#N/A	#N/A
Prudul26A003010P1	Prudul26A007564P1	#N/A	#N/A
Prudul26A025848P1	Prudul26A003010P1	#N/A	#N/A
Prudul26A021933P2	Prudul26A003030P1	#N/A	#N/A
Prudul26A009942P1	Prudul26A003031P1	#N/A	#N/A
Prudul26A003035P1	Prudul26A003035P2	#N/A	#N/A
Prudul26A003041P1	Prudul26A003041P2	#N/A	#N/A
Prudul26A003041P2	Prudul26A003041P3	#N/A	#N/A
Prudul26A003046P1	Prudul26A003949P1	#N/A	#N/A
Prudul26A003048P1	Prudul26A003048P2	#N/A	#N/A
Prudul26A003048P2	Prudul26A032357P1	#N/A	#N/A
Prudul26A003051P1	Prudul26A003051P2	#N/A	#N/A
Prudul26A003053P1	Prudul26A003053P2	#N/A	#N/A
Prudul26A003054P1	Prudul26A030979P1	#N/A	#N/A
Prudul26A003060P1	Prudul26A013268P1	#N/A	#N/A
Prudul26A003066P1	Prudul26A003066P2	#N/A	#N/A
Prudul26A003068P1	Prudul26A003068P2	#N/A	#N/A
Prudul26A003076P1	Prudul26A006329P1	#N/A	#N/A
Prudul26A003082P1	Prudul26A003082P2	#N/A	#N/A
Prudul26A003082P2	Prudul26A003082P3	#N/A	#N/A
Prudul26A029953P1	Prudul26A003089P1	#N/A	#N/A
Prudul26A003094P1	Prudul26A003094P2	#N/A	#N/A
Prudul26A013613P2	Prudul26A003094P1	#N/A	#N/A
Prudul26A003102P1	Prudul26A003102P2	#N/A	#N/A
Prudul26A003105P1	Prudul26A003105P2	#N/A	#N/A
Prudul26A021692P1	Prudul26A003121P1	#N/A	#N/A
Prudul26A003125P1	Prudul26A026698P1	#N/A	#N/A
Prudul26A003128P1	Prudul26A011047P1	#N/A	#N/A
Prudul26A003133P1	Prudul26A003133P2	#N/A	#N/A
Prudul26A030273P1	Prudul26A003138P1	#N/A	#N/A
Prudul26A020222P1	Prudul26A003147P1	#N/A	#N/A
Prudul26A003856P1	Prudul26A003151P1	#N/A	#N/A
Prudul26A003151P1	Prudul26A006120P1	#N/A	#N/A
Prudul26A003154P1	Prudul26A003154P2	#N/A	#N/A
Prudul26A003154P2	Prudul26A003154P3	#N/A	#N/A
Prudul26A012264P1	Prudul26A003157P1	#N/A	#N/A
Prudul26A014835P1	Prudul26A003161P1	#N/A	#N/A
Prudul26A003164P1	Prudul26A003164P2	#N/A	#N/A
Prudul26A024913P1	Prudul26A003166P1	#N/A	#N/A
Prudul26A003169P1	Prudul26A003169P2	#N/A	#N/A
Prudul26A003180P1	Prudul26A031578P1	#N/A	#N/A
Prudul26A003182P1	Prudul26A003182P2	#N/A	#N/A
Prudul26A003186P1	Prudul26A003186P2	#N/A	#N/A
Prudul26A010568P1	Prudul26A003192P1	#N/A	#N/A
Prudul26A011315P1	Prudul26A003199P1	#N/A	#N/A
Prudul26A003199P1	Prudul26A025106P1	#N/A	#N/A
Prudul26A003202P1	Prudul26A003202P2	#N/A	#N/A
Prudul26A003204P1	Prudul26A003204P2	#N/A	#N/A
Prudul26A003209P1	Prudul26A010105P1	#N/A	#N/A
Prudul26A003220P1	Prudul26A003220P2	#N/A	#N/A
Prudul26A003225P1	Prudul26A003225P2	#N/A	#N/A
Prudul26A006380P2	Prudul26A003227P1	#N/A	#N/A
Prudul26A003227P1	Prudul26A010294P1	#N/A	#N/A
Prudul26A003229P1	Prudul26A003229P2	#N/A	#N/A
Prudul26A003235P1	Prudul26A003235P2	#N/A	#N/A
Prudul26A010114P1	Prudul26A003239P1	#N/A	#N/A
Prudul26A011786P1	Prudul26A003242P1	#N/A	#N/A
Prudul26A003242P1	Prudul26A027076P1	#N/A	#N/A
Prudul26A003244P1	Prudul26A003244P2	#N/A	#N/A
Prudul26A003255P1	Prudul26A003255P2	#N/A	#N/A
Prudul26A003255P2	Prudul26A026526P1	#N/A	#N/A
Prudul26A003265P1	Prudul26A003265P2	#N/A	#N/A
Prudul26A003278P1	Prudul26A003278P2	#N/A	#N/A
Prudul26A003278P2	Prudul26A003278P3	#N/A	#N/A
Prudul26A008548P1	Prudul26A003288P1	#N/A	#N/A
Prudul26A003288P1	Prudul26A031565P1	#N/A	#N/A
Prudul26A003292P1	Prudul26A003292P2	#N/A	#N/A
Prudul26A003294P1	Prudul26A003294P2	#N/A	#N/A
Prudul26A003297P1	Prudul26A003297P2	#N/A	#N/A
Prudul26A006801P1	Prudul26A003312P1	#N/A	#N/A
Prudul26A003314P1	Prudul26A003314P2	#N/A	#N/A
Prudul26A003316P1	Prudul26A003316P2	#N/A	#N/A
Prudul26A003319P1	Prudul26A010199P1	#N/A	#N/A
Prudul26A018104P1	Prudul26A003319P1	#N/A	#N/A
Prudul26A003321P1	Prudul26A003321P2	#N/A	#N/A
Prudul26A003328P1	Prudul26A030556P1	#N/A	#N/A
Prudul26A003337P1	Prudul26A003337P2	#N/A	#N/A
Prudul26A003347P1	Prudul26A003347P2	#N/A	#N/A
Prudul26A003353P1	Prudul26A003353P2	#N/A	#N/A
Prudul26A024918P2	Prudul26A003364P1	#N/A	#N/A
Prudul26A003367P1	Prudul26A003367P2	#N/A	#N/A
Prudul26A029023P1	Prudul26A003367P1	#N/A	#N/A
Prudul26A003367P2	Prudul26A003367P3	#N/A	#N/A
Prudul26A003372P1	Prudul26A003372P2	#N/A	#N/A
Prudul26A003376P1	Prudul26A003376P2	#N/A	#N/A
Prudul26A009234P1	Prudul26A003376P1	#N/A	#N/A
Prudul26A003376P2	Prudul26A003376P3	#N/A	#N/A
Prudul26A003378P1	Prudul26A003378P2	#N/A	#N/A
Prudul26A003384P1	Prudul26A028967P1	#N/A	#N/A
Prudul26A003389P1	Prudul26A003389P2	#N/A	#N/A
Prudul26A003398P1	Prudul26A003398P2	#N/A	#N/A
Prudul26A003403P1	Prudul26A003403P2	#N/A	#N/A
Prudul26A005690P1	Prudul26A003410P1	#N/A	#N/A
Prudul26A003414P1	Prudul26A003414P2	#N/A	#N/A
Prudul26A003422P1	Prudul26A003422P2	#N/A	#N/A
Prudul26A003424P1	Prudul26A003424P2	#N/A	#N/A
Prudul26A003434P1	Prudul26A003434P2	#N/A	#N/A
Prudul26A003434P2	Prudul26A003434P3	#N/A	#N/A
Prudul26A027320P1	Prudul26A003437P1	#N/A	#N/A
Prudul26A003440P1	Prudul26A003440P2	#N/A	#N/A
Prudul26A003443P1	Prudul26A028642P1	#N/A	#N/A
Prudul26A003452P1	Prudul26A003452P2	#N/A	#N/A
Prudul26A012701P1	Prudul26A003453P1	#N/A	#N/A
Prudul26A003453P1	Prudul26A027328P1	#N/A	#N/A
Prudul26A003456P1	Prudul26A003456P2	#N/A	#N/A
Prudul26A030316P1	Prudul26A003460P1	#N/A	#N/A
Prudul26A003464P1	Prudul26A003464P2	#N/A	#N/A
Prudul26A003467P1	Prudul26A003467P2	#N/A	#N/A
Prudul26A027166P1	Prudul26A003468P1	#N/A	#N/A
Prudul26A003479P1	Prudul26A003479P2	#N/A	#N/A
Prudul26A003486P1	Prudul26A003486P2	#N/A	#N/A
Prudul26A003491P1	Prudul26A003491P2	#N/A	#N/A
Prudul26A003494P1	Prudul26A003494P2	#N/A	#N/A
Prudul26A003498P1	Prudul26A003498P2	#N/A	#N/A
Prudul26A003503P1	Prudul26A003503P2	#N/A	#N/A
Prudul26A003506P1	Prudul26A003506P2	#N/A	#N/A
Prudul26A003512P1	Prudul26A003512P2	#N/A	#N/A
Prudul26A003515P1	Prudul26A003515P2	#N/A	#N/A
Prudul26A003521P1	Prudul26A003521P2	#N/A	#N/A
Prudul26A003521P2	Prudul26A003521P3	#N/A	#N/A
Prudul26A003524P1	Prudul26A003524P2	#N/A	#N/A
Prudul26A003526P1	Prudul26A003526P2	#N/A	#N/A
Prudul26A003536P1	Prudul26A027138P1	#N/A	#N/A
Prudul26A003553P1	Prudul26A003553P2	#N/A	#N/A
Prudul26A003557P1	Prudul26A008342P1	#N/A	#N/A
Prudul26A003558P1	Prudul26A008322P1	#N/A	#N/A
Prudul26A003563P1	Prudul26A003563P2	#N/A	#N/A
Prudul26A003569P1	Prudul26A003569P2	#N/A	#N/A
Prudul26A003577P1	Prudul26A008348P1	#N/A	#N/A
Prudul26A006631P1	Prudul26A003581P1	#N/A	#N/A
Prudul26A003589P1	Prudul26A003589P2	#N/A	#N/A
Prudul26A018314P1	Prudul26A003591P1	#N/A	#N/A
Prudul26A003592P1	Prudul26A029798P1	#N/A	#N/A
Prudul26A003596P1	Prudul26A003596P2	#N/A	#N/A
Prudul26A025317P2	Prudul26A003597P1	#N/A	#N/A
Prudul26A003600P1	Prudul26A003600P2	#N/A	#N/A
Prudul26A010645P1	Prudul26A003601P1	#N/A	#N/A
Prudul26A003601P1	Prudul26A025774P1	#N/A	#N/A
Prudul26A014524P1	Prudul26A003603P1	#N/A	#N/A
Prudul26A003603P1	Prudul26A025121P1	#N/A	#N/A
Prudul26A003612P1	Prudul26A003612P2	#N/A	#N/A
Prudul26A003615P1	Prudul26A003615P2	#N/A	#N/A
Prudul26A003620P1	Prudul26A003620P2	#N/A	#N/A
Prudul26A003626P1	Prudul26A012996P1	#N/A	#N/A
Prudul26A003628P1	Prudul26A003628P2	#N/A	#N/A
Prudul26A003629P1	Prudul26A010707P1	#N/A	#N/A
Prudul26A003632P1	Prudul26A003632P2	#N/A	#N/A
Prudul26A003632P2	Prudul26A003632P3	#N/A	#N/A
Prudul26A003634P1	Prudul26A003634P2	#N/A	#N/A
Prudul26A003636P1	Prudul26A026913P1	#N/A	#N/A
Prudul26A003648P1	Prudul26A003648P2	#N/A	#N/A
Prudul26A003663P1	Prudul26A014852P1	#N/A	#N/A
Prudul26A003665P1	Prudul26A010650P1	#N/A	#N/A
Prudul26A003668P1	Prudul26A003668P2	#N/A	#N/A
Prudul26A027242P1	Prudul26A003668P1	#N/A	#N/A
Prudul26A026320P1	Prudul26A003670P1	#N/A	#N/A
Prudul26A003678P1	Prudul26A003678P2	#N/A	#N/A
Prudul26A021102P1	Prudul26A003680P1	#N/A	#N/A
Prudul26A003687P1	Prudul26A013997P1	#N/A	#N/A
Prudul26A003688P1	Prudul26A028288P1	#N/A	#N/A
Prudul26A016560P1	Prudul26A003689P1	#N/A	#N/A
Prudul26A003690P1	Prudul26A011021P1	#N/A	#N/A
Prudul26A007484P1	Prudul26A003692P1	#N/A	#N/A
Prudul26A003692P1	Prudul26A021925P1	#N/A	#N/A
Prudul26A025665P1	Prudul26A003693P1	#N/A	#N/A
Prudul26A003699P1	Prudul26A003699P2	#N/A	#N/A
Prudul26A025373P1	Prudul26A003710P1	#N/A	#N/A
Prudul26A003716P1	Prudul26A027694P1	#N/A	#N/A
Prudul26A003719P1	Prudul26A003719P2	#N/A	#N/A
Prudul26A003719P2	Prudul26A003719P3	#N/A	#N/A
Prudul26A003720P1	Prudul26A015900P1	#N/A	#N/A
Prudul26A003733P1	Prudul26A003733P2	#N/A	#N/A
Prudul26A003733P2	Prudul26A003733P3	#N/A	#N/A
Prudul26A003749P1	Prudul26A003749P2	#N/A	#N/A
Prudul26A003751P1	Prudul26A003751P2	#N/A	#N/A
Prudul26A003753P1	Prudul26A003753P2	#N/A	#N/A
Prudul26A003760P1	Prudul26A003760P2	#N/A	#N/A
Prudul26A003763P1	Prudul26A003763P2	#N/A	#N/A
Prudul26A003763P2	Prudul26A003763P3	#N/A	#N/A
Prudul26A019018P2	Prudul26A003764P1	#N/A	#N/A
Prudul26A003764P1	Prudul26A027586P1	#N/A	#N/A
Prudul26A003768P1	Prudul26A003768P2	#N/A	#N/A
Prudul26A003770P1	Prudul26A003770P2	#N/A	#N/A
Prudul26A003776P1	Prudul26A003776P2	#N/A	#N/A
Prudul26A003783P1	Prudul26A003783P2	#N/A	#N/A
Prudul26A003787P1	Prudul26A003787P2	#N/A	#N/A
Prudul26A011038P1	Prudul26A003789P1	#N/A	#N/A
Prudul26A003791P1	Prudul26A003791P2	#N/A	#N/A
Prudul26A003795P1	Prudul26A003795P2	#N/A	#N/A
Prudul26A025793P1	Prudul26A003795P1	#N/A	#N/A
Prudul26A003795P2	Prudul26A003795P3	#N/A	#N/A
Prudul26A003795P3	Prudul26A006381P1	#N/A	#N/A
Prudul26A003799P1	Prudul26A003799P2	#N/A	#N/A
Prudul26A003800P1	Prudul26A009896P1	#N/A	#N/A
Prudul26A003802P1	Prudul26A003802P2	#N/A	#N/A
Prudul26A003805P1	Prudul26A003805P2	#N/A	#N/A
Prudul26A003814P1	Prudul26A003814P2	#N/A	#N/A
Prudul26A027409P1	Prudul26A003816P1	#N/A	#N/A
Prudul26A003818P1	Prudul26A004665P1	#N/A	#N/A
Prudul26A011154P1	Prudul26A003818P1	#N/A	#N/A
Prudul26A027442P2	Prudul26A003829P1	#N/A	#N/A
Prudul26A003833P1	Prudul26A003833P2	#N/A	#N/A
Prudul26A010915P2	Prudul26A003837P1	#N/A	#N/A
Prudul26A003840P1	Prudul26A003840P2	#N/A	#N/A
Prudul26A003843P1	Prudul26A003843P2	#N/A	#N/A
Prudul26A003843P2	Prudul26A003843P3	#N/A	#N/A
Prudul26A003845P1	Prudul26A003845P2	#N/A	#N/A
Prudul26A009615P1	Prudul26A003856P1	#N/A	#N/A
Prudul26A003860P1	Prudul26A003860P2	#N/A	#N/A
Prudul26A003887P1	Prudul26A003864P1	#N/A	#N/A
Prudul26A003866P1	Prudul26A010810P1	#N/A	#N/A
Prudul26A014587P1	Prudul26A003869P1	#N/A	#N/A
Prudul26A021966P1	Prudul26A003887P1	#N/A	#N/A
Prudul26A003896P1	Prudul26A003896P2	#N/A	#N/A
Prudul26A003899P1	Prudul26A003899P2	#N/A	#N/A
Prudul26A003899P2	Prudul26A003899P3	#N/A	#N/A
Prudul26A003903P1	Prudul26A003903P2	#N/A	#N/A
Prudul26A003903P2	Prudul26A003903P3	#N/A	#N/A
Prudul26A003907P1	Prudul26A029701P1	#N/A	#N/A
Prudul26A021939P1	Prudul26A003919P1	#N/A	#N/A
Prudul26A003921P1	Prudul26A003921P2	#N/A	#N/A
Prudul26A027273P1	Prudul26A003928P1	#N/A	#N/A
Prudul26A027392P1	Prudul26A003929P1	#N/A	#N/A
Prudul26A003946P1	Prudul26A003946P2	#N/A	#N/A
Prudul26A003959P1	Prudul26A003959P2	#N/A	#N/A
Prudul26A003961P1	Prudul26A003961P2	#N/A	#N/A
Prudul26A003962P1	Prudul26A008943P1	#N/A	#N/A
Prudul26A007669P1	Prudul26A003963P1	#N/A	#N/A
Prudul26A003963P1	Prudul26A025411P1	#N/A	#N/A
Prudul26A003972P1	Prudul26A020823P1	#N/A	#N/A
Prudul26A003977P1	Prudul26A027819P1	#N/A	#N/A
Prudul26A010562P1	Prudul26A003980P1	#N/A	#N/A
Prudul26A003980P1	Prudul26A027208P1	#N/A	#N/A
Prudul26A003982P1	Prudul26A003982P2	#N/A	#N/A
Prudul26A003985P1	Prudul26A003985P2	#N/A	#N/A
Prudul26A003991P1	Prudul26A003991P2	#N/A	#N/A
Prudul26A003991P2	Prudul26A029583P1	#N/A	#N/A
Prudul26A003998P1	Prudul26A003998P2	#N/A	#N/A
Prudul26A010780P1	Prudul26A003999P1	#N/A	#N/A
Prudul26A004010P1	Prudul26A004010P2	#N/A	#N/A
Prudul26A004020P1	Prudul26A004020P2	#N/A	#N/A
Prudul26A029079P1	Prudul26A004024P1	#N/A	#N/A
Prudul26A004027P1	Prudul26A004027P2	#N/A	#N/A
Prudul26A004032P1	Prudul26A004032P2	#N/A	#N/A
Prudul26A008024P1	Prudul26A004033P1	#N/A	#N/A
Prudul26A027857P1	Prudul26A004035P1	#N/A	#N/A
Prudul26A004040P1	Prudul26A004040P2	#N/A	#N/A
Prudul26A004042P1	Prudul26A004042P2	#N/A	#N/A
Prudul26A015169P1	Prudul26A004043P1	#N/A	#N/A
Prudul26A004053P1	Prudul26A004053P2	#N/A	#N/A
Prudul26A027770P1	Prudul26A004053P1	#N/A	#N/A
Prudul26A004054P1	Prudul26A030232P1	#N/A	#N/A
Prudul26A004059P1	Prudul26A004059P2	#N/A	#N/A
Prudul26A004059P2	Prudul26A004059P3	#N/A	#N/A
Prudul26A004065P1	Prudul26A025805P1	#N/A	#N/A
Prudul26A004077P1	Prudul26A027655P1	#N/A	#N/A
Prudul26A004081P1	Prudul26A004081P2	#N/A	#N/A
Prudul26A004085P1	Prudul26A005278P1	#N/A	#N/A
Prudul26A027814P1	Prudul26A004085P1	#N/A	#N/A
Prudul26A004090P1	Prudul26A004090P2	Prudul26A004090P1	Prudul26A004090P2
Prudul26A004096P1	Prudul26A004096P2	#N/A	#N/A
Prudul26A027588P1	Prudul26A004099P1	#N/A	#N/A
Prudul26A004102P1	Prudul26A004102P2	#N/A	#N/A
Prudul26A004112P1	Prudul26A004112P2	#N/A	#N/A
Prudul26A007089P1	Prudul26A004116P1	#N/A	#N/A
Prudul26A004128P1	Prudul26A004128P2	#N/A	#N/A
Prudul26A004130P1	Prudul26A004130P2	#N/A	#N/A
Prudul26A004130P2	Prudul26A013693P1	#N/A	#N/A
Prudul26A023507P1	Prudul26A004140P1	#N/A	#N/A
Prudul26A021228P1	Prudul26A004142P1	#N/A	#N/A
Prudul26A004146P1	Prudul26A027681P1	#N/A	#N/A
Prudul26A004151P1	Prudul26A004151P2	#N/A	#N/A
Prudul26A004151P2	Prudul26A004151P3	#N/A	#N/A
Prudul26A004156P1	Prudul26A009059P1	#N/A	#N/A
Prudul26A027422P2	Prudul26A004156P1	#N/A	#N/A
Prudul26A004161P1	Prudul26A028010P1	#N/A	#N/A
Prudul26A004164P1	Prudul26A004164P2	#N/A	#N/A
Prudul26A004171P1	Prudul26A004171P2	#N/A	#N/A
Prudul26A004178P1	Prudul26A023515P1	#N/A	#N/A
Prudul26A004183P1	Prudul26A021224P1	#N/A	#N/A
Prudul26A004188P1	Prudul26A004188P2	#N/A	#N/A
Prudul26A010502P1	Prudul26A004193P1	#N/A	#N/A
Prudul26A004206P1	Prudul26A004206P2	#N/A	#N/A
Prudul26A004209P1	Prudul26A004209P2	#N/A	#N/A
Prudul26A004213P1	Prudul26A024126P1	#N/A	#N/A
Prudul26A004219P1	Prudul26A032458P1	#N/A	#N/A
Prudul26A004221P1	Prudul26A004221P2	#N/A	#N/A
Prudul26A004224P1	Prudul26A004224P2	#N/A	#N/A
Prudul26A017259P1	Prudul26A004226P1	#N/A	#N/A
Prudul26A004226P1	Prudul26A019549P1	#N/A	#N/A
Prudul26A004231P1	Prudul26A028759P1	#N/A	#N/A
Prudul26A004232P1	Prudul26A004650P1	#N/A	#N/A
Prudul26A010932P1	Prudul26A004233P1	#N/A	#N/A
Prudul26A004237P1	Prudul26A004237P2	#N/A	#N/A
Prudul26A004237P2	Prudul26A004237P3	#N/A	#N/A
Prudul26A004245P1	Prudul26A013617P1	#N/A	#N/A
Prudul26A019821P1	Prudul26A004255P1	#N/A	#N/A
Prudul26A004260P1	Prudul26A004260P2	#N/A	#N/A
Prudul26A008685P1	Prudul26A004262P1	#N/A	#N/A
Prudul26A015043P1	Prudul26A004272P1	#N/A	#N/A
Prudul26A013667P1	Prudul26A004275P1	#N/A	#N/A
Prudul26A004276P1	Prudul26A030530P1	#N/A	#N/A
Prudul26A004287P1	Prudul26A004287P2	#N/A	#N/A
Prudul26A004289P1	Prudul26A004289P2	#N/A	#N/A
Prudul26A008900P1	Prudul26A004292P1	#N/A	#N/A
Prudul26A004292P1	Prudul26A011328P1	#N/A	#N/A
Prudul26A004296P1	Prudul26A004296P2	#N/A	#N/A
Prudul26A004297P1	Prudul26A027861P1	#N/A	#N/A
Prudul26A004304P1	Prudul26A004304P2	#N/A	#N/A
Prudul26A004311P1	Prudul26A020039P1	#N/A	#N/A
Prudul26A030948P1	Prudul26A004313P1	#N/A	#N/A
Prudul26A004316P1	Prudul26A015168P1	#N/A	#N/A
Prudul26A004317P1	Prudul26A032246P1	#N/A	#N/A
Prudul26A004323P1	Prudul26A012342P1	#N/A	#N/A
Prudul26A004328P1	Prudul26A004328P2	#N/A	#N/A
Prudul26A011720P1	Prudul26A004332P1	#N/A	#N/A
Prudul26A004344P1	Prudul26A004344P2	#N/A	#N/A
Prudul26A004351P1	Prudul26A006537P1	#N/A	#N/A
Prudul26A010749P1	Prudul26A004351P1	#N/A	#N/A
Prudul26A028722P1	Prudul26A004358P1	#N/A	#N/A
Prudul26A004361P1	Prudul26A004361P2	#N/A	#N/A
Prudul26A032090P1	Prudul26A004361P1	#N/A	#N/A
Prudul26A004370P1	Prudul26A004370P2	#N/A	#N/A
Prudul26A004372P1	Prudul26A004372P2	#N/A	#N/A
Prudul26A026374P2	Prudul26A004372P1	#N/A	#N/A
Prudul26A015795P1	Prudul26A004374P1	#N/A	#N/A
Prudul26A010876P1	Prudul26A004375P1	#N/A	#N/A
Prudul26A004387P1	Prudul26A004387P2	#N/A	#N/A
Prudul26A004390P1	Prudul26A004390P2	#N/A	#N/A
Prudul26A028691P1	Prudul26A004390P1	#N/A	#N/A
Prudul26A023584P1	Prudul26A004394P1	#N/A	#N/A
Prudul26A004394P1	Prudul26A027517P1	#N/A	#N/A
Prudul26A004397P1	Prudul26A004397P2	#N/A	#N/A
Prudul26A004399P1	Prudul26A004399P2	#N/A	#N/A
Prudul26A004402P1	Prudul26A004402P2	#N/A	#N/A
Prudul26A004402P2	Prudul26A004402P3	#N/A	#N/A
Prudul26A004404P1	Prudul26A004404P2	#N/A	#N/A
Prudul26A004406P1	Prudul26A004406P2	#N/A	#N/A
Prudul26A004412P1	Prudul26A004412P2	#N/A	#N/A
Prudul26A006353P1	Prudul26A004414P1	#N/A	#N/A
Prudul26A004414P1	Prudul26A030027P1	#N/A	#N/A
Prudul26A009371P1	Prudul26A004416P1	#N/A	#N/A
Prudul26A004417P1	Prudul26A014339P1	#N/A	#N/A
Prudul26A004424P1	Prudul26A004424P2	#N/A	#N/A
Prudul26A004424P2	Prudul26A004424P3	#N/A	#N/A
Prudul26A004436P1	Prudul26A004436P2	#N/A	#N/A
Prudul26A004436P2	Prudul26A004436P3	#N/A	#N/A
Prudul26A004442P1	Prudul26A005465P1	#N/A	#N/A
Prudul26A004444P1	Prudul26A004444P2	#N/A	#N/A
Prudul26A013682P1	Prudul26A004449P1	#N/A	#N/A
Prudul26A004454P1	Prudul26A004454P2	#N/A	#N/A
Prudul26A004462P1	Prudul26A004462P2	#N/A	#N/A
Prudul26A004464P1	Prudul26A004464P2	#N/A	#N/A
Prudul26A004467P1	Prudul26A031501P1	#N/A	#N/A
Prudul26A032673P1	Prudul26A004470P1	#N/A	#N/A
Prudul26A004474P1	Prudul26A004474P2	#N/A	#N/A
Prudul26A004474P2	Prudul26A004474P3	#N/A	#N/A
Prudul26A019800P1	Prudul26A004476P1	#N/A	#N/A
Prudul26A004478P1	Prudul26A022784P1	#N/A	#N/A
Prudul26A006143P1	Prudul26A004479P1	#N/A	#N/A
Prudul26A004492P1	Prudul26A004492P2	#N/A	#N/A
Prudul26A004495P1	Prudul26A009317P1	#N/A	#N/A
Prudul26A004502P1	Prudul26A004502P2	#N/A	#N/A
Prudul26A004505P1	Prudul26A004505P2	#N/A	#N/A
Prudul26A004510P1	Prudul26A004510P2	#N/A	#N/A
Prudul26A004510P2	Prudul26A004510P3	#N/A	#N/A
Prudul26A004512P1	Prudul26A013039P1	#N/A	#N/A
Prudul26A016687P1	Prudul26A004512P1	#N/A	#N/A
Prudul26A004519P1	Prudul26A004519P2	#N/A	#N/A
Prudul26A004525P1	Prudul26A004525P2	#N/A	#N/A
Prudul26A004530P1	Prudul26A004530P2	#N/A	#N/A
Prudul26A032683P1	Prudul26A004533P1	#N/A	#N/A
Prudul26A004533P1	Prudul26A033091P1	#N/A	#N/A
Prudul26A030325P1	Prudul26A004546P1	#N/A	#N/A
Prudul26A004548P1	Prudul26A004548P2	#N/A	#N/A
Prudul26A004549P1	Prudul26A029844P1	#N/A	#N/A
Prudul26A013557P1	Prudul26A004562P1	#N/A	#N/A
Prudul26A004562P1	Prudul26A028815P1	#N/A	#N/A
Prudul26A004567P1	Prudul26A029714P1	#N/A	#N/A
Prudul26A014031P1	Prudul26A004572P1	#N/A	#N/A
Prudul26A015815P1	Prudul26A004573P1	#N/A	#N/A
Prudul26A032033P1	Prudul26A004584P1	#N/A	#N/A
Prudul26A004595P1	Prudul26A004595P2	#N/A	#N/A
Prudul26A004595P2	Prudul26A004595P3	#N/A	#N/A
Prudul26A004597P1	Prudul26A004597P2	#N/A	#N/A
Prudul26A004600P1	Prudul26A004600P2	#N/A	#N/A
Prudul26A004600P2	Prudul26A004600P3	#N/A	#N/A
Prudul26A004602P1	Prudul26A004602P2	#N/A	#N/A
Prudul26A019717P1	Prudul26A004606P1	#N/A	#N/A
Prudul26A004609P1	Prudul26A004609P2	#N/A	#N/A
Prudul26A004612P1	Prudul26A004612P2	#N/A	#N/A
Prudul26A016356P1	Prudul26A004614P1	#N/A	#N/A
Prudul26A004617P1	Prudul26A004617P2	#N/A	#N/A
Prudul26A004618P1	Prudul26A032304P1	#N/A	#N/A
Prudul26A004619P1	Prudul26A022970P1	#N/A	#N/A
Prudul26A004623P1	Prudul26A004623P2	#N/A	#N/A
Prudul26A004623P2	Prudul26A032286P1	#N/A	#N/A
Prudul26A004640P1	Prudul26A004640P2	#N/A	#N/A
Prudul26A004643P1	Prudul26A004643P2	#N/A	#N/A
Prudul26A004643P2	Prudul26A004643P3	#N/A	#N/A
Prudul26A004655P1	Prudul26A019632P1	#N/A	#N/A
Prudul26A004659P1	Prudul26A004659P2	#N/A	#N/A
Prudul26A013764P1	Prudul26A004662P1	#N/A	#N/A
Prudul26A004662P1	Prudul26A032077P1	#N/A	#N/A
Prudul26A004665P1	Prudul26A030225P1	#N/A	#N/A
Prudul26A004676P1	Prudul26A004676P2	#N/A	#N/A
Prudul26A015864P1	Prudul26A004679P1	#N/A	#N/A
Prudul26A004688P1	Prudul26A015923P1	#N/A	#N/A
Prudul26A004703P1	Prudul26A004703P2	#N/A	#N/A
Prudul26A004712P1	Prudul26A004712P2	#N/A	#N/A
Prudul26A004716P1	Prudul26A004716P2	#N/A	#N/A
Prudul26A004718P1	Prudul26A027429P1	#N/A	#N/A
Prudul26A004721P1	Prudul26A030860P1	#N/A	#N/A
Prudul26A004725P1	Prudul26A004725P2	#N/A	#N/A
Prudul26A016197P1	Prudul26A004729P1	#N/A	#N/A
Prudul26A004731P1	Prudul26A004731P2	#N/A	#N/A
Prudul26A019049P1	Prudul26A004732P1	#N/A	#N/A
Prudul26A004736P1	Prudul26A004736P2	#N/A	#N/A
Prudul26A004738P1	Prudul26A004738P2	#N/A	#N/A
Prudul26A027348P3	Prudul26A004742P1	#N/A	#N/A
Prudul26A004751P1	Prudul26A004751P2	#N/A	#N/A
Prudul26A028310P1	Prudul26A004754P1	#N/A	#N/A
Prudul26A004754P1	Prudul26A031874P1	#N/A	#N/A
Prudul26A004756P1	Prudul26A030446P1	#N/A	#N/A
Prudul26A029122P1	Prudul26A004760P1	#N/A	#N/A
Prudul26A004764P1	Prudul26A024611P1	#N/A	#N/A
Prudul26A004768P1	Prudul26A004768P2	#N/A	#N/A
Prudul26A004778P1	Prudul26A004778P2	#N/A	#N/A
Prudul26A004781P1	Prudul26A004781P2	#N/A	#N/A
Prudul26A032924P1	Prudul26A004782P1	#N/A	#N/A
Prudul26A004790P1	Prudul26A004790P2	#N/A	#N/A
Prudul26A015887P1	Prudul26A004790P1	#N/A	#N/A
Prudul26A004797P1	Prudul26A030371P1	#N/A	#N/A
Prudul26A004799P1	Prudul26A004799P2	#N/A	#N/A
Prudul26A029176P1	Prudul26A004800P1	#N/A	#N/A
Prudul26A004802P1	Prudul26A004802P2	#N/A	#N/A
Prudul26A004806P1	Prudul26A004806P2	#N/A	#N/A
Prudul26A004806P2	Prudul26A004806P3	#N/A	#N/A
Prudul26A004810P1	Prudul26A004810P2	#N/A	#N/A
Prudul26A004826P1	Prudul26A004826P2	#N/A	#N/A
Prudul26A004829P1	Prudul26A004829P2	#N/A	#N/A
Prudul26A004829P2	Prudul26A004829P3	#N/A	#N/A
Prudul26A021702P1	Prudul26A004832P1	#N/A	#N/A
Prudul26A004841P1	Prudul26A004841P2	#N/A	#N/A
Prudul26A007054P1	Prudul26A004847P1	#N/A	#N/A
Prudul26A004850P1	Prudul26A004850P2	#N/A	#N/A
Prudul26A004857P1	Prudul26A004857P2	#N/A	#N/A
Prudul26A004859P1	Prudul26A004859P2	#N/A	#N/A
Prudul26A004877P1	Prudul26A004877P2	#N/A	#N/A
Prudul26A004881P1	Prudul26A004881P2	#N/A	#N/A
Prudul26A004905P1	Prudul26A004905P2	#N/A	#N/A
Prudul26A031329P1	Prudul26A004906P1	#N/A	#N/A
Prudul26A004910P1	Prudul26A004910P2	#N/A	#N/A
Prudul26A004912P1	Prudul26A014394P1	#N/A	#N/A
Prudul26A004919P1	Prudul26A004919P2	#N/A	#N/A
Prudul26A004929P1	Prudul26A012821P1	#N/A	#N/A
Prudul26A027363P1	Prudul26A004929P1	#N/A	#N/A
Prudul26A004932P1	Prudul26A004932P2	#N/A	#N/A
Prudul26A004940P1	Prudul26A004940P2	#N/A	#N/A
Prudul26A004942P1	Prudul26A004942P2	#N/A	#N/A
Prudul26A030832P1	Prudul26A004948P1	#N/A	#N/A
Prudul26A004952P1	Prudul26A004952P2	#N/A	#N/A
Prudul26A004959P1	Prudul26A009867P1	#N/A	#N/A
Prudul26A004965P1	Prudul26A004965P2	#N/A	#N/A
Prudul26A004971P1	Prudul26A004971P2	#N/A	#N/A
Prudul26A004973P1	Prudul26A004973P2	#N/A	#N/A
Prudul26A004973P2	Prudul26A028897P1	#N/A	#N/A
Prudul26A004974P1	Prudul26A014154P1	#N/A	#N/A
Prudul26A004977P1	Prudul26A004977P2	#N/A	#N/A
Prudul26A004987P1	Prudul26A004987P2	#N/A	#N/A
Prudul26A014429P1	Prudul26A004988P1	#N/A	#N/A
Prudul26A016154P2	Prudul26A004990P1	#N/A	#N/A
Prudul26A004990P1	Prudul26A021354P1	#N/A	#N/A
Prudul26A005000P1	Prudul26A005000P2	#N/A	#N/A
Prudul26A005008P1	Prudul26A005008P2	#N/A	#N/A
Prudul26A005014P1	Prudul26A005014P2	#N/A	#N/A
Prudul26A020044P1	Prudul26A005016P1	#N/A	#N/A
Prudul26A005022P1	Prudul26A005022P2	#N/A	#N/A
Prudul26A009880P1	Prudul26A005023P1	#N/A	#N/A
Prudul26A005023P1	Prudul26A032219P1	#N/A	#N/A
Prudul26A005025P1	Prudul26A014447P1	#N/A	#N/A
Prudul26A005027P1	Prudul26A005027P2	#N/A	#N/A
Prudul26A005035P1	Prudul26A005035P2	#N/A	#N/A
Prudul26A008553P1	Prudul26A005035P1	#N/A	#N/A
Prudul26A005035P2	Prudul26A030953P1	#N/A	#N/A
Prudul26A005046P1	Prudul26A013476P1	#N/A	#N/A
Prudul26A010060P1	Prudul26A005050P1	#N/A	#N/A
Prudul26A005050P1	Prudul26A032900P1	#N/A	#N/A
Prudul26A028103P1	Prudul26A005060P1	#N/A	#N/A
Prudul26A005062P1	Prudul26A005062P2	#N/A	#N/A
Prudul26A005072P1	Prudul26A005072P2	#N/A	#N/A
Prudul26A005087P1	Prudul26A025949P1	#N/A	#N/A
Prudul26A005088P1	Prudul26A020227P1	#N/A	#N/A
Prudul26A014204P1	Prudul26A005090P1	#N/A	#N/A
Prudul26A005100P1	Prudul26A020400P1	#N/A	#N/A
Prudul26A030404P1	Prudul26A005100P1	#N/A	#N/A
Prudul26A005110P1	Prudul26A013313P1	#N/A	#N/A
Prudul26A005113P1	Prudul26A005113P2	#N/A	#N/A
Prudul26A005115P1	Prudul26A005115P2	#N/A	#N/A
Prudul26A005118P1	Prudul26A005118P2	#N/A	#N/A
Prudul26A005125P1	Prudul26A005125P2	#N/A	#N/A
Prudul26A005126P1	Prudul26A020514P1	#N/A	#N/A
Prudul26A005133P1	Prudul26A005133P2	#N/A	#N/A
Prudul26A005137P1	Prudul26A005137P2	#N/A	#N/A
Prudul26A005145P1	Prudul26A014182P1	#N/A	#N/A
Prudul26A028975P1	Prudul26A005146P1	#N/A	#N/A
Prudul26A005147P1	Prudul26A020213P1	#N/A	#N/A
Prudul26A005148P1	Prudul26A030028P1	#N/A	#N/A
Prudul26A030749P2	Prudul26A005152P1	#N/A	#N/A
Prudul26A005158P1	Prudul26A030632P1	#N/A	#N/A
Prudul26A005163P1	Prudul26A005163P2	#N/A	#N/A
Prudul26A005166P1	Prudul26A016264P1	#N/A	#N/A
Prudul26A030846P1	Prudul26A005167P1	#N/A	#N/A
Prudul26A013884P1	Prudul26A005169P1	#N/A	#N/A
Prudul26A005174P1	Prudul26A032678P1	#N/A	#N/A
Prudul26A016410P1	Prudul26A005175P1	#N/A	#N/A
Prudul26A005175P1	Prudul26A030434P1	#N/A	#N/A
Prudul26A005181P1	Prudul26A005181P2	#N/A	#N/A
Prudul26A030818P1	Prudul26A005183P1	#N/A	#N/A
Prudul26A005185P1	Prudul26A005185P2	#N/A	#N/A
Prudul26A019793P1	Prudul26A005185P1	#N/A	#N/A
Prudul26A005189P1	Prudul26A005189P2	#N/A	#N/A
Prudul26A005192P1	Prudul26A032139P1	#N/A	#N/A
Prudul26A005203P1	Prudul26A005203P2	#N/A	#N/A
Prudul26A005215P1	Prudul26A005215P2	#N/A	#N/A
Prudul26A005215P2	Prudul26A005215P3	#N/A	#N/A
Prudul26A005218P1	Prudul26A005218P2	#N/A	#N/A
Prudul26A005218P2	Prudul26A016345P1	#N/A	#N/A
Prudul26A005227P1	Prudul26A005227P2	#N/A	#N/A
Prudul26A005235P1	Prudul26A005235P2	#N/A	#N/A
Prudul26A005247P1	Prudul26A005247P2	#N/A	#N/A
Prudul26A005252P1	Prudul26A005252P2	#N/A	#N/A
Prudul26A005254P1	Prudul26A005254P2	#N/A	#N/A
Prudul26A005260P1	Prudul26A005260P2	#N/A	#N/A
Prudul26A005269P1	Prudul26A005269P2	#N/A	#N/A
Prudul26A014988P1	Prudul26A005272P1	#N/A	#N/A
Prudul26A005272P1	Prudul26A025012P1	#N/A	#N/A
Prudul26A030225P1	Prudul26A005277P1	#N/A	#N/A
Prudul26A023443P1	Prudul26A005284P1	#N/A	#N/A
Prudul26A005285P1	Prudul26A031269P1	#N/A	#N/A
Prudul26A010838P1	Prudul26A005288P1	#N/A	#N/A
Prudul26A005297P1	Prudul26A024497P1	#N/A	#N/A
Prudul26A032000P1	Prudul26A005297P1	#N/A	#N/A
Prudul26A005300P1	Prudul26A005300P2	#N/A	#N/A
Prudul26A005308P1	Prudul26A005308P2	#N/A	#N/A
Prudul26A012511P1	Prudul26A005310P1	#N/A	#N/A
Prudul26A031373P1	Prudul26A005316P1	#N/A	#N/A
Prudul26A005320P1	Prudul26A030418P1	#N/A	#N/A
Prudul26A030644P1	Prudul26A005322P1	#N/A	#N/A
Prudul26A005336P1	Prudul26A005336P2	#N/A	#N/A
Prudul26A005349P1	Prudul26A005349P2	#N/A	#N/A
Prudul26A005351P1	Prudul26A005351P2	#N/A	#N/A
Prudul26A021354P1	Prudul26A005353P1	#N/A	#N/A
Prudul26A005365P1	Prudul26A012288P1	#N/A	#N/A
Prudul26A005368P1	Prudul26A005368P2	#N/A	#N/A
Prudul26A005371P1	Prudul26A032465P1	#N/A	#N/A
Prudul26A005375P1	Prudul26A005375P2	#N/A	#N/A
Prudul26A005376P1	Prudul26A030782P1	#N/A	#N/A
Prudul26A005379P1	Prudul26A005379P2	#N/A	#N/A
Prudul26A012971P1	Prudul26A005387P1	#N/A	#N/A
Prudul26A005387P1	Prudul26A018961P1	#N/A	#N/A
Prudul26A005397P1	Prudul26A005397P2	#N/A	#N/A
Prudul26A005397P2	Prudul26A005397P3	#N/A	#N/A
Prudul26A005405P1	Prudul26A005405P2	#N/A	#N/A
Prudul26A005410P1	Prudul26A005410P2	#N/A	#N/A
Prudul26A005410P2	Prudul26A005410P3	#N/A	#N/A
Prudul26A005413P1	Prudul26A005413P2	#N/A	#N/A
Prudul26A005419P1	Prudul26A005419P2	#N/A	#N/A
Prudul26A005423P1	Prudul26A005423P2	#N/A	#N/A
Prudul26A007301P1	Prudul26A005424P1	#N/A	#N/A
Prudul26A005424P1	Prudul26A025727P1	#N/A	#N/A
Prudul26A005433P1	Prudul26A005433P2	#N/A	#N/A
Prudul26A012559P1	Prudul26A005438P1	#N/A	#N/A
Prudul26A005442P1	Prudul26A005442P2	#N/A	#N/A
Prudul26A029312P1	Prudul26A005444P1	#N/A	#N/A
Prudul26A005450P1	Prudul26A028978P1	#N/A	#N/A
Prudul26A005453P1	Prudul26A009116P1	#N/A	#N/A
Prudul26A005457P1	Prudul26A005457P2	#N/A	#N/A
Prudul26A005468P1	Prudul26A005468P2	#N/A	#N/A
Prudul26A015762P2	Prudul26A005469P1	#N/A	#N/A
Prudul26A005469P1	Prudul26A029273P1	#N/A	#N/A
Prudul26A005471P1	Prudul26A005471P2	#N/A	#N/A
Prudul26A031155P1	Prudul26A005474P1	#N/A	#N/A
Prudul26A005476P1	Prudul26A005476P2	#N/A	#N/A
Prudul26A005487P1	Prudul26A026809P1	#N/A	#N/A
Prudul26A031457P1	Prudul26A005489P1	#N/A	#N/A
Prudul26A005494P1	Prudul26A005494P2	#N/A	#N/A
Prudul26A005494P2	Prudul26A005494P3	#N/A	#N/A
Prudul26A005496P1	Prudul26A005496P2	#N/A	#N/A
Prudul26A005498P1	Prudul26A005498P2	#N/A	#N/A
Prudul26A005500P1	Prudul26A005500P2	#N/A	#N/A
Prudul26A005503P1	Prudul26A017458P1	#N/A	#N/A
Prudul26A005509P1	Prudul26A005509P2	#N/A	#N/A
Prudul26A005515P1	Prudul26A005515P2	#N/A	#N/A
Prudul26A005525P1	Prudul26A005525P2	#N/A	#N/A
Prudul26A005538P1	Prudul26A005538P2	#N/A	#N/A
Prudul26A005541P1	Prudul26A005541P2	#N/A	#N/A
Prudul26A005543P1	Prudul26A005543P2	#N/A	#N/A
Prudul26A005546P1	Prudul26A005546P2	#N/A	#N/A
Prudul26A005551P1	Prudul26A005551P2	#N/A	#N/A
Prudul26A005551P2	Prudul26A005551P3	#N/A	#N/A
Prudul26A005561P1	Prudul26A005561P2	#N/A	#N/A
Prudul26A005563P1	Prudul26A005563P2	#N/A	#N/A
Prudul26A005567P1	Prudul26A005567P2	#N/A	#N/A
Prudul26A005570P1	Prudul26A005570P2	#N/A	#N/A
Prudul26A005572P1	Prudul26A005572P2	#N/A	#N/A
Prudul26A005580P1	Prudul26A005580P2	#N/A	#N/A
Prudul26A005585P1	Prudul26A005585P2	#N/A	#N/A
Prudul26A005585P2	Prudul26A005585P3	#N/A	#N/A
Prudul26A005594P1	Prudul26A016481P1	#N/A	#N/A
Prudul26A030435P1	Prudul26A005594P1	#N/A	#N/A
Prudul26A005600P1	Prudul26A005600P2	#N/A	#N/A
Prudul26A005608P1	Prudul26A005608P2	#N/A	#N/A
Prudul26A005614P1	Prudul26A026348P1	#N/A	#N/A
Prudul26A030971P1	Prudul26A005614P1	#N/A	#N/A
Prudul26A005617P1	Prudul26A019183P1	#N/A	#N/A
Prudul26A014548P1	Prudul26A005623P1	#N/A	#N/A
Prudul26A005623P1	Prudul26A029133P1	#N/A	#N/A
Prudul26A005633P1	Prudul26A005633P2	Prudul26A005633P1	Prudul26A005633P2
Prudul26A005636P1	Prudul26A030447P1	#N/A	#N/A
Prudul26A005648P1	Prudul26A005648P2	#N/A	#N/A
Prudul26A005654P1	Prudul26A005654P2	#N/A	#N/A
Prudul26A020897P1	Prudul26A005655P1	#N/A	#N/A
Prudul26A014561P2	Prudul26A005657P1	#N/A	#N/A
Prudul26A029228P1	Prudul26A005659P1	#N/A	#N/A
Prudul26A010472P1	Prudul26A005662P1	#N/A	#N/A
Prudul26A005676P1	Prudul26A005676P2	#N/A	#N/A
Prudul26A029154P1	Prudul26A005679P1	#N/A	#N/A
Prudul26A019226P1	Prudul26A005690P1	#N/A	#N/A
Prudul26A005696P1	Prudul26A005696P2	#N/A	#N/A
Prudul26A005696P2	Prudul26A016316P1	#N/A	#N/A
Prudul26A005697P1	Prudul26A009006P1	#N/A	#N/A
Prudul26A005703P1	Prudul26A018963P1	#N/A	#N/A
Prudul26A005706P1	Prudul26A005706P2	#N/A	#N/A
Prudul26A025901P1	Prudul26A005711P1	#N/A	#N/A
Prudul26A031989P1	Prudul26A005712P1	#N/A	#N/A
Prudul26A005720P1	Prudul26A005720P2	#N/A	#N/A
Prudul26A005724P1	Prudul26A009864P1	#N/A	#N/A
Prudul26A016869P1	Prudul26A005724P1	#N/A	#N/A
Prudul26A005725P1	Prudul26A016366P1	#N/A	#N/A
Prudul26A005736P1	Prudul26A005736P2	#N/A	#N/A
Prudul26A021174P1	Prudul26A005737P1	#N/A	#N/A
Prudul26A005742P1	Prudul26A005742P2	#N/A	#N/A
Prudul26A029636P1	Prudul26A005750P1	#N/A	#N/A
Prudul26A005754P1	Prudul26A005754P2	#N/A	#N/A
Prudul26A008389P1	Prudul26A005757P1	#N/A	#N/A
Prudul26A005762P1	Prudul26A005762P2	#N/A	#N/A
Prudul26A005773P1	Prudul26A005773P2	#N/A	#N/A
Prudul26A005776P1	Prudul26A005776P2	#N/A	#N/A
Prudul26A016221P1	Prudul26A005780P1	#N/A	#N/A
Prudul26A005783P1	Prudul26A005783P2	#N/A	#N/A
Prudul26A005795P1	Prudul26A005795P2	#N/A	#N/A
Prudul26A015503P1	Prudul26A005795P1	#N/A	#N/A
Prudul26A005802P1	Prudul26A005802P2	#N/A	#N/A
Prudul26A005802P2	Prudul26A005802P3	#N/A	#N/A
Prudul26A005812P1	Prudul26A005812P2	#N/A	#N/A
Prudul26A019631P1	Prudul26A005813P1	#N/A	#N/A
Prudul26A005818P1	Prudul26A005818P2	#N/A	#N/A
Prudul26A005818P2	Prudul26A005818P3	#N/A	#N/A
Prudul26A005820P1	Prudul26A005820P2	#N/A	#N/A
Prudul26A005822P1	Prudul26A014881P1	#N/A	#N/A
Prudul26A005828P1	Prudul26A005828P2	#N/A	#N/A
Prudul26A005831P1	Prudul26A005831P2	#N/A	#N/A
Prudul26A015698P1	Prudul26A005834P1	#N/A	#N/A
Prudul26A005837P1	Prudul26A005837P2	#N/A	#N/A
Prudul26A005838P1	Prudul26A013718P1	#N/A	#N/A
Prudul26A005849P1	Prudul26A005849P2	#N/A	#N/A
Prudul26A012969P1	Prudul26A005851P1	#N/A	#N/A
Prudul26A015064P1	Prudul26A005860P1	#N/A	#N/A
Prudul26A005864P1	Prudul26A030639P1	#N/A	#N/A
Prudul26A005868P1	Prudul26A005868P2	#N/A	#N/A
Prudul26A005875P1	Prudul26A005875P2	#N/A	#N/A
Prudul26A015341P1	Prudul26A005878P1	#N/A	#N/A
Prudul26A028146P1	Prudul26A005881P1	#N/A	#N/A
Prudul26A005884P1	Prudul26A005884P2	#N/A	#N/A
Prudul26A005888P1	Prudul26A005888P2	#N/A	#N/A
Prudul26A005900P1	Prudul26A005900P2	#N/A	#N/A
Prudul26A012412P1	Prudul26A005900P1	#N/A	#N/A
Prudul26A013082P1	Prudul26A005904P1	#N/A	#N/A
Prudul26A005911P1	Prudul26A005911P2	#N/A	#N/A
Prudul26A005917P1	Prudul26A005917P2	#N/A	#N/A
Prudul26A005927P1	Prudul26A005927P2	#N/A	#N/A
Prudul26A005933P1	Prudul26A005933P2	#N/A	#N/A
Prudul26A005943P1	Prudul26A005943P2	#N/A	#N/A
Prudul26A005944P1	Prudul26A011554P1	#N/A	#N/A
Prudul26A005947P1	Prudul26A005947P2	#N/A	#N/A
Prudul26A005950P1	Prudul26A005950P2	#N/A	#N/A
Prudul26A005950P2	Prudul26A005950P3	#N/A	#N/A
Prudul26A005954P1	Prudul26A005954P2	#N/A	#N/A
Prudul26A019128P1	Prudul26A005963P1	#N/A	#N/A
Prudul26A005963P1	Prudul26A031621P1	#N/A	#N/A
Prudul26A005964P1	Prudul26A033083P1	#N/A	#N/A
Prudul26A015421P1	Prudul26A005972P1	#N/A	#N/A
Prudul26A005972P1	Prudul26A029023P1	#N/A	#N/A
Prudul26A005980P1	Prudul26A005980P2	#N/A	#N/A
Prudul26A005985P1	Prudul26A013055P1	#N/A	#N/A
Prudul26A027211P1	Prudul26A005985P1	#N/A	#N/A
Prudul26A005991P1	Prudul26A005991P2	#N/A	#N/A
Prudul26A005995P1	Prudul26A005995P2	#N/A	#N/A
Prudul26A026958P1	Prudul26A006007P1	#N/A	#N/A
Prudul26A006013P1	Prudul26A006013P2	#N/A	#N/A
Prudul26A006028P1	Prudul26A006028P2	#N/A	#N/A
Prudul26A012841P2	Prudul26A006032P1	#N/A	#N/A
Prudul26A006032P1	Prudul26A027633P1	#N/A	#N/A
Prudul26A006039P1	Prudul26A006039P2	#N/A	#N/A
Prudul26A006049P1	Prudul26A029648P1	#N/A	#N/A
Prudul26A006058P1	Prudul26A006058P2	#N/A	#N/A
Prudul26A006062P1	Prudul26A006062P2	#N/A	#N/A
Prudul26A006067P1	Prudul26A006067P2	#N/A	#N/A
Prudul26A006072P1	Prudul26A006072P2	#N/A	#N/A
Prudul26A006077P1	Prudul26A006077P2	#N/A	#N/A
Prudul26A006079P1	Prudul26A006079P2	#N/A	#N/A
Prudul26A006090P1	Prudul26A006090P2	#N/A	#N/A
Prudul26A013230P1	Prudul26A006093P1	#N/A	#N/A
Prudul26A006098P1	Prudul26A006098P2	#N/A	#N/A
Prudul26A006106P1	Prudul26A006106P2	#N/A	#N/A
Prudul26A006107P1	Prudul26A015267P1	#N/A	#N/A
Prudul26A006112P1	Prudul26A006112P2	#N/A	#N/A
Prudul26A021131P1	Prudul26A006113P1	#N/A	#N/A
Prudul26A006123P1	Prudul26A006123P2	#N/A	#N/A
Prudul26A006126P1	Prudul26A006126P2	#N/A	#N/A
Prudul26A025077P1	Prudul26A006130P1	#N/A	#N/A
Prudul26A006134P1	Prudul26A026941P1	#N/A	#N/A
Prudul26A006138P1	Prudul26A006138P2	#N/A	#N/A
Prudul26A006139P1	Prudul26A013629P1	#N/A	#N/A
Prudul26A006140P1	Prudul26A032580P1	#N/A	#N/A
Prudul26A029786P1	Prudul26A006141P1	#N/A	#N/A
Prudul26A030053P1	Prudul26A006143P1	#N/A	#N/A
Prudul26A006151P1	Prudul26A006151P2	#N/A	#N/A
Prudul26A006165P1	Prudul26A006165P2	#N/A	#N/A
Prudul26A006165P2	Prudul26A015381P1	#N/A	#N/A
Prudul26A006167P1	Prudul26A006167P2	#N/A	#N/A
Prudul26A006170P1	Prudul26A006170P2	#N/A	#N/A
Prudul26A031613P1	Prudul26A006170P1	#N/A	#N/A
Prudul26A006174P1	Prudul26A006174P2	#N/A	#N/A
Prudul26A006174P2	Prudul26A006174P3	#N/A	#N/A
Prudul26A013273P1	Prudul26A006175P1	#N/A	#N/A
Prudul26A006182P1	Prudul26A006182P2	#N/A	#N/A
Prudul26A006185P1	Prudul26A006185P2	#N/A	#N/A
Prudul26A006185P2	Prudul26A008730P1	#N/A	#N/A
Prudul26A006192P1	Prudul26A006192P2	#N/A	#N/A
Prudul26A006192P2	Prudul26A006192P3	#N/A	#N/A
Prudul26A006194P1	Prudul26A015399P1	#N/A	#N/A
Prudul26A016053P1	Prudul26A006194P1	#N/A	#N/A
Prudul26A006205P1	Prudul26A006205P2	#N/A	#N/A
Prudul26A006212P1	Prudul26A006212P2	#N/A	#N/A
Prudul26A015246P1	Prudul26A006212P1	#N/A	#N/A
Prudul26A006212P2	Prudul26A018536P1	#N/A	#N/A
Prudul26A009817P1	Prudul26A006214P1	#N/A	#N/A
Prudul26A006214P1	Prudul26A032143P1	#N/A	#N/A
Prudul26A013051P2	Prudul26A006215P1	Prudul26A013051P2	Prudul26A006215P1
Prudul26A006221P1	Prudul26A006221P2	#N/A	#N/A
Prudul26A006229P1	Prudul26A030044P1	#N/A	#N/A
Prudul26A006233P1	Prudul26A006233P2	#N/A	#N/A
Prudul26A006242P1	Prudul26A006242P2	#N/A	#N/A
Prudul26A006247P1	Prudul26A006247P2	#N/A	#N/A
Prudul26A016593P1	Prudul26A006251P1	#N/A	#N/A
Prudul26A006253P1	Prudul26A006253P2	#N/A	#N/A
Prudul26A006273P1	Prudul26A006273P2	#N/A	#N/A
Prudul26A006275P1	Prudul26A006275P2	#N/A	#N/A
Prudul26A029951P1	Prudul26A006279P1	#N/A	#N/A
Prudul26A006281P1	Prudul26A006281P2	#N/A	#N/A
Prudul26A006289P1	Prudul26A006289P2	#N/A	#N/A
Prudul26A006292P1	Prudul26A010298P1	#N/A	#N/A
Prudul26A025618P1	Prudul26A006293P1	#N/A	#N/A
Prudul26A006303P1	Prudul26A018111P1	#N/A	#N/A
Prudul26A006305P1	Prudul26A006305P2	#N/A	#N/A
Prudul26A006306P1	Prudul26A021311P1	#N/A	#N/A
Prudul26A006309P1	Prudul26A006309P2	#N/A	#N/A
Prudul26A031910P1	Prudul26A006309P1	#N/A	#N/A
Prudul26A006316P2	Prudul26A006316P3	#N/A	#N/A
Prudul26A006317P1	Prudul26A028127P1	#N/A	#N/A
Prudul26A006319P1	Prudul26A026045P1	#N/A	#N/A
Prudul26A006322P1	Prudul26A006322P2	#N/A	#N/A
Prudul26A015528P1	Prudul26A006333P1	#N/A	#N/A
Prudul26A031875P1	Prudul26A006339P1	#N/A	#N/A
Prudul26A006343P1	Prudul26A006343P2	#N/A	#N/A
Prudul26A006345P1	Prudul26A006345P2	#N/A	#N/A
Prudul26A006351P1	Prudul26A032134P1	#N/A	#N/A
Prudul26A006352P1	Prudul26A014777P1	#N/A	#N/A
Prudul26A017673P1	Prudul26A006352P1	#N/A	#N/A
Prudul26A017900P1	Prudul26A006353P1	#N/A	#N/A
Prudul26A006357P1	Prudul26A006357P2	#N/A	#N/A
Prudul26A006362P1	Prudul26A006362P2	#N/A	#N/A
Prudul26A030643P1	Prudul26A006364P1	#N/A	#N/A
Prudul26A032307P1	Prudul26A006369P1	#N/A	#N/A
Prudul26A006380P1	Prudul26A006380P2	#N/A	#N/A
Prudul26A009584P1	Prudul26A006380P1	#N/A	#N/A
Prudul26A006381P1	Prudul26A018423P1	#N/A	#N/A
Prudul26A006385P1	Prudul26A006385P2	#N/A	#N/A
Prudul26A006389P1	Prudul26A006389P2	#N/A	#N/A
Prudul26A006390P1	Prudul26A013521P1	#N/A	#N/A
Prudul26A006399P1	Prudul26A006399P2	#N/A	#N/A
Prudul26A006406P1	Prudul26A006406P2	#N/A	#N/A
Prudul26A006409P1	Prudul26A006409P2	#N/A	#N/A
Prudul26A006425P1	Prudul26A006425P2	#N/A	#N/A
Prudul26A006433P1	Prudul26A013732P1	#N/A	#N/A
Prudul26A021163P1	Prudul26A006433P1	#N/A	#N/A
Prudul26A006439P1	Prudul26A006439P2	#N/A	#N/A
Prudul26A006442P1	Prudul26A013213P1	#N/A	#N/A
Prudul26A031641P1	Prudul26A006442P1	#N/A	#N/A
Prudul26A029252P1	Prudul26A006456P1	#N/A	#N/A
Prudul26A006456P1	Prudul26A032172P1	#N/A	#N/A
Prudul26A006458P1	Prudul26A006458P2	#N/A	#N/A
Prudul26A006459P1	Prudul26A010016P1	#N/A	#N/A
Prudul26A006461P1	Prudul26A026505P1	#N/A	#N/A
Prudul26A006463P1	Prudul26A006463P2	#N/A	#N/A
Prudul26A006473P1	Prudul26A006473P2	#N/A	#N/A
Prudul26A006478P1	Prudul26A006478P2	#N/A	#N/A
Prudul26A006483P1	Prudul26A015933P1	#N/A	#N/A
Prudul26A006498P1	Prudul26A006498P2	#N/A	#N/A
Prudul26A029961P1	Prudul26A006500P1	#N/A	#N/A
Prudul26A006504P1	Prudul26A006504P2	#N/A	#N/A
Prudul26A006510P1	Prudul26A006510P2	#N/A	#N/A
Prudul26A013128P1	Prudul26A006511P1	#N/A	#N/A
Prudul26A006515P1	Prudul26A006515P2	#N/A	#N/A
Prudul26A006515P2	Prudul26A032194P1	#N/A	#N/A
Prudul26A006520P1	Prudul26A006520P2	#N/A	#N/A
Prudul26A006524P1	Prudul26A006524P2	#N/A	#N/A
Prudul26A006526P1	Prudul26A006526P2	#N/A	#N/A
Prudul26A015201P1	Prudul26A006526P1	#N/A	#N/A
Prudul26A006529P1	Prudul26A015994P1	#N/A	#N/A
Prudul26A006545P1	Prudul26A006545P2	#N/A	#N/A
Prudul26A006550P1	Prudul26A006550P2	#N/A	#N/A
Prudul26A014439P1	Prudul26A006558P1	#N/A	#N/A
Prudul26A006561P1	Prudul26A026099P1	#N/A	#N/A
Prudul26A006568P1	Prudul26A006568P2	#N/A	#N/A
Prudul26A006574P1	Prudul26A006574P2	#N/A	#N/A
Prudul26A006579P1	Prudul26A006579P2	#N/A	#N/A
Prudul26A030436P1	Prudul26A006584P1	#N/A	#N/A
Prudul26A013462P1	Prudul26A006585P1	#N/A	#N/A
Prudul26A006587P1	Prudul26A006587P2	#N/A	#N/A
Prudul26A006596P1	Prudul26A006596P2	#N/A	#N/A
Prudul26A006599P1	Prudul26A012261P1	#N/A	#N/A
Prudul26A006613P1	Prudul26A015015P1	#N/A	#N/A
Prudul26A006619P1	Prudul26A006619P2	#N/A	#N/A
Prudul26A027511P1	Prudul26A006619P1	#N/A	#N/A
Prudul26A006624P1	Prudul26A032346P1	#N/A	#N/A
Prudul26A006625P1	Prudul26A012175P1	#N/A	#N/A
Prudul26A013752P1	Prudul26A006627P1	#N/A	#N/A
Prudul26A006637P1	Prudul26A006637P2	#N/A	#N/A
Prudul26A019849P1	Prudul26A006639P1	#N/A	#N/A
Prudul26A032047P1	Prudul26A006641P1	#N/A	#N/A
Prudul26A006645P1	Prudul26A006645P2	#N/A	#N/A
Prudul26A006645P2	Prudul26A006645P3	#N/A	#N/A
Prudul26A006647P1	Prudul26A006647P2	#N/A	#N/A
Prudul26A006656P1	Prudul26A015769P1	#N/A	#N/A
Prudul26A030003P1	Prudul26A006656P1	#N/A	#N/A
Prudul26A006658P1	Prudul26A006658P2	#N/A	#N/A
Prudul26A006660P1	Prudul26A006660P2	#N/A	#N/A
Prudul26A006662P1	Prudul26A006662P2	#N/A	#N/A
Prudul26A006668P1	Prudul26A006668P2	#N/A	#N/A
Prudul26A006673P1	Prudul26A006673P2	#N/A	#N/A
Prudul26A006675P1	Prudul26A006675P2	#N/A	#N/A
Prudul26A006681P1	Prudul26A006681P2	#N/A	#N/A
Prudul26A006698P1	Prudul26A006698P2	#N/A	#N/A
Prudul26A006704P1	Prudul26A006704P2	#N/A	#N/A
Prudul26A006714P1	Prudul26A006714P2	#N/A	#N/A
Prudul26A020714P1	Prudul26A006716P1	#N/A	#N/A
Prudul26A006718P1	Prudul26A006718P2	#N/A	#N/A
Prudul26A006721P1	Prudul26A006721P2	#N/A	#N/A
Prudul26A006724P1	Prudul26A006724P2	#N/A	#N/A
Prudul26A006725P1	Prudul26A012864P1	#N/A	#N/A
Prudul26A016951P1	Prudul26A006734P1	#N/A	#N/A
Prudul26A006738P1	Prudul26A006738P2	#N/A	#N/A
Prudul26A006742P1	Prudul26A006742P2	#N/A	#N/A
Prudul26A006748P1	Prudul26A006748P2	#N/A	#N/A
Prudul26A006751P1	Prudul26A006751P2	#N/A	#N/A
Prudul26A006756P1	Prudul26A006756P2	#N/A	#N/A
Prudul26A006760P1	Prudul26A006760P2	#N/A	#N/A
Prudul26A006765P1	Prudul26A006765P2	#N/A	#N/A
Prudul26A006772P1	Prudul26A015207P1	#N/A	#N/A
Prudul26A006775P1	Prudul26A006775P2	#N/A	#N/A
Prudul26A006775P2	Prudul26A006775P3	#N/A	#N/A
Prudul26A006779P1	Prudul26A006779P2	#N/A	#N/A
Prudul26A006784P1	Prudul26A013016P1	#N/A	#N/A
Prudul26A006788P1	Prudul26A006788P2	#N/A	#N/A
Prudul26A008722P1	Prudul26A006790P1	#N/A	#N/A
Prudul26A016225P1	Prudul26A006791P1	#N/A	#N/A
Prudul26A006795P1	Prudul26A006795P2	#N/A	#N/A
Prudul26A006797P1	Prudul26A006797P2	#N/A	#N/A
Prudul26A006804P1	Prudul26A006804P2	#N/A	#N/A
Prudul26A006807P1	Prudul26A006807P2	#N/A	#N/A
Prudul26A006810P1	Prudul26A006810P2	#N/A	#N/A
Prudul26A006812P1	Prudul26A006812P2	#N/A	#N/A
Prudul26A014217P2	Prudul26A006812P1	#N/A	#N/A
Prudul26A006816P1	Prudul26A032664P1	#N/A	#N/A
Prudul26A006828P1	Prudul26A006828P2	#N/A	#N/A
Prudul26A006828P2	Prudul26A006828P3	#N/A	#N/A
Prudul26A006842P1	Prudul26A006842P2	#N/A	#N/A
Prudul26A006845P1	Prudul26A006845P2	#N/A	#N/A
Prudul26A006854P1	Prudul26A010282P1	#N/A	#N/A
Prudul26A029543P1	Prudul26A006854P1	#N/A	#N/A
Prudul26A010412P1	Prudul26A006859P1	#N/A	#N/A
Prudul26A006878P1	Prudul26A006878P2	#N/A	#N/A
Prudul26A006885P1	Prudul26A006885P2	#N/A	#N/A
Prudul26A006892P1	Prudul26A006892P2	#N/A	#N/A
Prudul26A006894P1	Prudul26A006894P2	#N/A	#N/A
Prudul26A006896P1	Prudul26A006896P2	#N/A	#N/A
Prudul26A006897P1	Prudul26A032576P1	#N/A	#N/A
Prudul26A006912P1	Prudul26A006912P2	#N/A	#N/A
Prudul26A009870P1	Prudul26A006913P1	#N/A	#N/A
Prudul26A006917P1	Prudul26A006917P2	#N/A	#N/A
Prudul26A029005P1	Prudul26A006931P1	#N/A	#N/A
Prudul26A006934P1	Prudul26A006934P2	#N/A	#N/A
Prudul26A006940P1	Prudul26A006940P2	#N/A	#N/A
Prudul26A006940P2	Prudul26A006940P3	#N/A	#N/A
Prudul26A006943P1	Prudul26A006943P2	#N/A	#N/A
Prudul26A018447P2	Prudul26A006943P1	#N/A	#N/A
Prudul26A006943P2	Prudul26A006943P3	#N/A	#N/A
Prudul26A006949P1	Prudul26A031018P1	#N/A	#N/A
Prudul26A006952P1	Prudul26A014412P1	#N/A	#N/A
Prudul26A006957P1	Prudul26A006957P2	#N/A	#N/A
Prudul26A006960P1	Prudul26A006960P2	#N/A	#N/A
Prudul26A030867P2	Prudul26A006960P1	#N/A	#N/A
Prudul26A006977P1	Prudul26A006977P2	#N/A	#N/A
Prudul26A006982P1	Prudul26A006982P2	#N/A	#N/A
Prudul26A006988P1	Prudul26A006988P2	#N/A	#N/A
Prudul26A006993P1	Prudul26A006993P2	#N/A	#N/A
Prudul26A006995P1	Prudul26A006995P2	#N/A	#N/A
Prudul26A006999P1	Prudul26A006999P2	#N/A	#N/A
Prudul26A007004P1	Prudul26A007004P2	#N/A	#N/A
Prudul26A007015P1	Prudul26A007015P2	#N/A	#N/A
Prudul26A007025P1	Prudul26A007025P2	#N/A	#N/A
Prudul26A007025P2	Prudul26A007025P3	#N/A	#N/A
Prudul26A007027P1	Prudul26A019427P1	#N/A	#N/A
Prudul26A007033P1	Prudul26A007033P2	#N/A	#N/A
Prudul26A007039P1	Prudul26A007039P2	#N/A	#N/A
Prudul26A007043P1	Prudul26A012813P1	#N/A	#N/A
Prudul26A007045P1	Prudul26A007045P2	#N/A	#N/A
Prudul26A007049P1	Prudul26A007049P2	#N/A	#N/A
Prudul26A018287P1	Prudul26A007050P1	#N/A	#N/A
Prudul26A007050P1	Prudul26A032100P1	#N/A	#N/A
Prudul26A007051P1	Prudul26A012831P1	#N/A	#N/A
Prudul26A032929P1	Prudul26A007051P1	#N/A	#N/A
Prudul26A007058P1	Prudul26A014409P1	#N/A	#N/A
Prudul26A014651P1	Prudul26A007063P1	#N/A	#N/A
Prudul26A007069P1	Prudul26A007069P2	#N/A	#N/A
Prudul26A007076P1	Prudul26A007076P2	#N/A	#N/A
Prudul26A007085P1	Prudul26A007085P2	#N/A	#N/A
Prudul26A032712P1	Prudul26A007085P1	#N/A	#N/A
Prudul26A026026P1	Prudul26A007091P1	#N/A	#N/A
Prudul26A014715P1	Prudul26A007100P1	#N/A	#N/A
Prudul26A007100P1	Prudul26A018594P1	#N/A	#N/A
Prudul26A007108P1	Prudul26A007108P2	#N/A	#N/A
Prudul26A007115P1	Prudul26A007115P2	#N/A	#N/A
Prudul26A007119P1	Prudul26A028562P1	#N/A	#N/A
Prudul26A007121P1	Prudul26A015520P1	#N/A	#N/A
Prudul26A026775P1	Prudul26A007121P1	#N/A	#N/A
Prudul26A007124P1	Prudul26A007124P2	#N/A	#N/A
Prudul26A007126P1	Prudul26A007126P2	#N/A	#N/A
Prudul26A007134P1	Prudul26A007134P2	#N/A	#N/A
Prudul26A007136P1	Prudul26A007136P2	#N/A	#N/A
Prudul26A023018P1	Prudul26A007137P1	#N/A	#N/A
Prudul26A007137P1	Prudul26A028931P1	#N/A	#N/A
Prudul26A007141P1	Prudul26A007141P2	#N/A	#N/A
Prudul26A007142P1	Prudul26A018569P1	#N/A	#N/A
Prudul26A024756P1	Prudul26A007142P1	#N/A	#N/A
Prudul26A007154P1	Prudul26A007154P2	#N/A	#N/A
Prudul26A012173P1	Prudul26A007158P1	#N/A	#N/A
Prudul26A007161P1	Prudul26A007161P2	#N/A	#N/A
Prudul26A014316P1	Prudul26A007162P1	#N/A	#N/A
Prudul26A007165P1	Prudul26A007165P2	#N/A	#N/A
Prudul26A007167P1	Prudul26A007167P2	#N/A	#N/A
Prudul26A014109P1	Prudul26A007170P1	#N/A	#N/A
Prudul26A007170P1	Prudul26A032947P1	#N/A	#N/A
Prudul26A007172P1	Prudul26A013903P1	#N/A	#N/A
Prudul26A017938P2	Prudul26A007172P1	#N/A	#N/A
Prudul26A007175P1	Prudul26A007175P2	#N/A	#N/A
Prudul26A007180P1	Prudul26A007181P1	#N/A	#N/A
Prudul26A016332P3	Prudul26A007180P1	#N/A	#N/A
Prudul26A007186P1	Prudul26A007186P2	#N/A	#N/A
Prudul26A030612P1	Prudul26A007188P1	#N/A	#N/A
Prudul26A007196P1	Prudul26A007196P2	#N/A	#N/A
Prudul26A007198P1	Prudul26A017313P1	#N/A	#N/A
Prudul26A007199P1	Prudul26A010926P1	#N/A	#N/A
Prudul26A023957P1	Prudul26A007207P1	#N/A	#N/A
Prudul26A007209P1	Prudul26A007209P2	#N/A	#N/A
Prudul26A007212P1	Prudul26A007212P2	#N/A	#N/A
Prudul26A007218P1	Prudul26A007218P2	#N/A	#N/A
Prudul26A007221P1	Prudul26A007221P2	#N/A	#N/A
Prudul26A007224P1	Prudul26A007224P2	#N/A	#N/A
Prudul26A007226P1	Prudul26A007226P2	#N/A	#N/A
Prudul26A007230P1	Prudul26A007230P2	#N/A	#N/A
Prudul26A007230P2	Prudul26A007230P3	#N/A	#N/A
Prudul26A007237P1	Prudul26A014139P1	#N/A	#N/A
Prudul26A007247P1	Prudul26A007247P2	#N/A	#N/A
Prudul26A007247P2	Prudul26A007247P3	#N/A	#N/A
Prudul26A007252P1	Prudul26A007252P2	#N/A	#N/A
Prudul26A032893P1	Prudul26A007252P1	#N/A	#N/A
Prudul26A007254P1	Prudul26A007254P2	#N/A	#N/A
Prudul26A028741P1	Prudul26A007256P1	#N/A	#N/A
Prudul26A007258P1	Prudul26A007258P2	#N/A	#N/A
Prudul26A007272P1	Prudul26A007272P2	#N/A	#N/A
Prudul26A007275P1	Prudul26A007275P2	#N/A	#N/A
Prudul26A007282P1	Prudul26A007282P2	#N/A	#N/A
Prudul26A031073P2	Prudul26A007283P1	#N/A	#N/A
Prudul26A031156P1	Prudul26A007288P1	#N/A	#N/A
Prudul26A007294P1	Prudul26A014689P1	#N/A	#N/A
Prudul26A007296P1	Prudul26A007296P2	#N/A	#N/A
Prudul26A014758P1	Prudul26A007296P1	#N/A	#N/A
Prudul26A029319P1	Prudul26A007303P1	#N/A	#N/A
Prudul26A007305P1	Prudul26A007305P2	#N/A	#N/A
Prudul26A007313P1	Prudul26A007313P2	#N/A	#N/A
Prudul26A020161P1	Prudul26A007318P1	#N/A	#N/A
Prudul26A007323P1	Prudul26A027341P1	#N/A	#N/A
Prudul26A007326P1	Prudul26A014863P1	#N/A	#N/A
Prudul26A007330P1	Prudul26A007330P2	#N/A	#N/A
Prudul26A007335P1	Prudul26A007335P2	#N/A	#N/A
Prudul26A007338P1	Prudul26A007338P2	#N/A	#N/A
Prudul26A007342P1	Prudul26A016137P1	#N/A	#N/A
Prudul26A007359P1	Prudul26A007359P2	#N/A	#N/A
Prudul26A007367P1	Prudul26A007367P2	#N/A	#N/A
Prudul26A018609P1	Prudul26A007368P1	#N/A	#N/A
Prudul26A007371P1	Prudul26A013375P1	#N/A	#N/A
Prudul26A007373P1	Prudul26A014645P1	#N/A	#N/A
Prudul26A029998P1	Prudul26A007373P1	#N/A	#N/A
Prudul26A007376P1	Prudul26A007376P2	#N/A	#N/A
Prudul26A007376P2	Prudul26A007376P3	#N/A	#N/A
Prudul26A007391P1	Prudul26A007391P2	#N/A	#N/A
Prudul26A007391P3	Prudul26A009158P1	#N/A	#N/A
Prudul26A007401P1	Prudul26A007401P2	#N/A	#N/A
Prudul26A007405P1	Prudul26A007405P2	#N/A	#N/A
Prudul26A007405P2	Prudul26A007405P3	#N/A	#N/A
Prudul26A020394P1	Prudul26A007406P1	#N/A	#N/A
Prudul26A007413P1	Prudul26A007413P2	#N/A	#N/A
Prudul26A012054P1	Prudul26A007414P1	#N/A	#N/A
Prudul26A007418P1	Prudul26A007418P2	#N/A	#N/A
Prudul26A011606P1	Prudul26A007421P1	#N/A	#N/A
Prudul26A007427P1	Prudul26A007427P2	#N/A	#N/A
Prudul26A015462P1	Prudul26A007437P1	#N/A	#N/A
Prudul26A007442P1	Prudul26A014310P1	#N/A	#N/A
Prudul26A007444P1	Prudul26A007444P2	#N/A	#N/A
Prudul26A007448P1	Prudul26A007448P2	#N/A	#N/A
Prudul26A007452P1	Prudul26A007452P2	#N/A	#N/A
Prudul26A007457P1	Prudul26A007457P2	#N/A	#N/A
Prudul26A007461P1	Prudul26A012781P1	#N/A	#N/A
Prudul26A007464P1	Prudul26A007464P2	#N/A	#N/A
Prudul26A010679P1	Prudul26A007464P1	#N/A	#N/A
Prudul26A010927P1	Prudul26A007468P1	#N/A	#N/A
Prudul26A007472P1	Prudul26A007472P2	#N/A	#N/A
Prudul26A007480P1	Prudul26A007480P2	#N/A	#N/A
Prudul26A007483P1	Prudul26A007483P2	#N/A	#N/A
Prudul26A007483P2	Prudul26A007483P3	#N/A	#N/A
Prudul26A010635P1	Prudul26A007484P1	#N/A	#N/A
Prudul26A007487P1	Prudul26A007487P2	#N/A	#N/A
Prudul26A007493P1	Prudul26A007493P2	#N/A	#N/A
Prudul26A007504P1	Prudul26A007504P2	#N/A	#N/A
Prudul26A007507P1	Prudul26A014623P1	#N/A	#N/A
Prudul26A029165P1	Prudul26A007507P1	#N/A	#N/A
Prudul26A007512P1	Prudul26A007512P2	#N/A	#N/A
Prudul26A007512P2	Prudul26A007512P3	#N/A	#N/A
Prudul26A007514P1	Prudul26A007514P2	#N/A	#N/A
Prudul26A007516P1	Prudul26A016942P1	#N/A	#N/A
Prudul26A026027P1	Prudul26A007516P1	#N/A	#N/A
Prudul26A007525P1	Prudul26A007525P2	#N/A	#N/A
Prudul26A007533P1	Prudul26A007533P2	#N/A	#N/A
Prudul26A007539P1	Prudul26A007539P2	#N/A	#N/A
Prudul26A012834P1	Prudul26A007543P1	#N/A	#N/A
Prudul26A007551P1	Prudul26A007551P2	#N/A	#N/A
Prudul26A007557P1	Prudul26A007557P2	#N/A	#N/A
Prudul26A007558P1	Prudul26A028898P1	#N/A	#N/A
Prudul26A007562P1	Prudul26A007562P2	#N/A	#N/A
Prudul26A007562P2	Prudul26A007562P3	#N/A	#N/A
Prudul26A007566P1	Prudul26A031284P1	#N/A	#N/A
Prudul26A007570P1	Prudul26A007570P2	#N/A	#N/A
Prudul26A007578P1	Prudul26A007578P2	#N/A	#N/A
Prudul26A007583P1	Prudul26A007583P2	#N/A	#N/A
Prudul26A007589P1	Prudul26A007589P2	#N/A	#N/A
Prudul26A007600P1	Prudul26A007600P2	#N/A	#N/A
Prudul26A007603P1	Prudul26A007603P2	#N/A	#N/A
Prudul26A014521P1	Prudul26A007604P1	#N/A	#N/A
Prudul26A026422P1	Prudul26A007610P1	#N/A	#N/A
Prudul26A007610P1	Prudul26A026422P2	#N/A	#N/A
Prudul26A007614P1	Prudul26A007614P2	#N/A	#N/A
Prudul26A007617P1	Prudul26A007617P2	#N/A	#N/A
Prudul26A007624P1	Prudul26A007624P2	#N/A	#N/A
Prudul26A007627P1	Prudul26A007627P2	#N/A	#N/A
Prudul26A012909P1	Prudul26A007631P1	#N/A	#N/A
Prudul26A014981P1	Prudul26A007634P1	#N/A	#N/A
Prudul26A007639P1	Prudul26A007639P2	#N/A	#N/A
Prudul26A007639P2	Prudul26A007639P3	#N/A	#N/A
Prudul26A007640P1	Prudul26A012944P1	#N/A	#N/A
Prudul26A007646P1	Prudul26A007646P2	#N/A	#N/A
Prudul26A012637P1	Prudul26A007646P1	#N/A	#N/A
Prudul26A007660P1	Prudul26A007660P2	#N/A	#N/A
Prudul26A007663P1	Prudul26A007663P2	#N/A	#N/A
Prudul26A029094P1	Prudul26A007669P1	#N/A	#N/A
Prudul26A007672P1	Prudul26A007672P2	#N/A	#N/A
Prudul26A012493P1	Prudul26A007672P1	#N/A	#N/A
Prudul26A007676P1	Prudul26A016068P1	#N/A	#N/A
Prudul26A007682P1	Prudul26A007682P2	#N/A	#N/A
Prudul26A007689P1	Prudul26A007689P2	#N/A	#N/A
Prudul26A031478P1	Prudul26A007690P1	#N/A	#N/A
Prudul26A016796P1	Prudul26A007696P1	#N/A	#N/A
Prudul26A007696P1	Prudul26A032982P1	#N/A	#N/A
Prudul26A007699P1	Prudul26A007699P2	#N/A	#N/A
Prudul26A007702P1	Prudul26A023204P1	#N/A	#N/A
Prudul26A007703P1	Prudul26A014801P1	#N/A	#N/A
Prudul26A007705P1	Prudul26A007705P2	#N/A	#N/A
Prudul26A007707P1	Prudul26A007707P2	#N/A	#N/A
Prudul26A007710P1	Prudul26A007710P2	#N/A	#N/A
Prudul26A030972P1	Prudul26A007712P1	#N/A	#N/A
Prudul26A007714P1	Prudul26A007714P2	#N/A	#N/A
Prudul26A012500P1	Prudul26A007716P1	#N/A	#N/A
Prudul26A025440P1	Prudul26A007718P1	#N/A	#N/A
Prudul26A007720P1	Prudul26A007720P2	#N/A	#N/A
Prudul26A007727P1	Prudul26A007727P2	#N/A	#N/A
Prudul26A007729P1	Prudul26A007729P2	#N/A	#N/A
Prudul26A007734P1	Prudul26A007734P2	#N/A	#N/A
Prudul26A007735P1	Prudul26A031425P1	#N/A	#N/A
Prudul26A007738P1	Prudul26A007738P2	#N/A	#N/A
Prudul26A030443P1	Prudul26A007754P1	#N/A	#N/A
Prudul26A007770P1	Prudul26A007770P2	#N/A	#N/A
Prudul26A021066P1	Prudul26A007773P1	#N/A	#N/A
Prudul26A031017P1	Prudul26A007781P1	#N/A	#N/A
Prudul26A007785P1	Prudul26A032469P1	#N/A	#N/A
Prudul26A032373P1	Prudul26A007788P1	#N/A	#N/A
Prudul26A007791P1	Prudul26A007791P2	#N/A	#N/A
Prudul26A007793P1	Prudul26A031648P1	#N/A	#N/A
Prudul26A007795P1	Prudul26A015423P1	#N/A	#N/A
Prudul26A007799P1	Prudul26A007799P2	#N/A	#N/A
Prudul26A007801P1	Prudul26A007801P2	#N/A	#N/A
Prudul26A007804P1	Prudul26A009216P1	#N/A	#N/A
Prudul26A007812P1	Prudul26A007812P2	#N/A	#N/A
Prudul26A031709P1	Prudul26A007813P1	#N/A	#N/A
Prudul26A007815P1	Prudul26A007815P2	#N/A	#N/A
Prudul26A031592P1	Prudul26A007818P1	#N/A	#N/A
Prudul26A007821P1	Prudul26A020524P1	#N/A	#N/A
Prudul26A007823P1	Prudul26A007823P2	#N/A	#N/A
Prudul26A007837P1	Prudul26A031698P1	#N/A	#N/A
Prudul26A007852P1	Prudul26A007852P2	#N/A	#N/A
Prudul26A007863P1	Prudul26A007863P2	#N/A	#N/A
Prudul26A007867P1	Prudul26A007867P2	#N/A	#N/A
Prudul26A007867P2	Prudul26A007867P3	#N/A	#N/A
Prudul26A029556P1	Prudul26A007870P1	#N/A	#N/A
Prudul26A009936P1	Prudul26A007876P1	#N/A	#N/A
Prudul26A007876P1	Prudul26A032485P1	#N/A	#N/A
Prudul26A007885P1	Prudul26A007885P2	#N/A	#N/A
Prudul26A019328P2	Prudul26A007888P1	#N/A	#N/A
Prudul26A026491P1	Prudul26A007890P1	#N/A	#N/A
Prudul26A031896P1	Prudul26A007908P1	#N/A	#N/A
Prudul26A015054P1	Prudul26A007909P1	#N/A	#N/A
Prudul26A007909P1	Prudul26A029678P1	#N/A	#N/A
Prudul26A031780P1	Prudul26A007910P1	#N/A	#N/A
Prudul26A007912P1	Prudul26A029194P1	#N/A	#N/A
Prudul26A012961P1	Prudul26A007918P1	#N/A	#N/A
Prudul26A018112P1	Prudul26A007921P1	#N/A	#N/A
Prudul26A007921P1	Prudul26A031582P1	#N/A	#N/A
Prudul26A007928P1	Prudul26A007928P2	#N/A	#N/A
Prudul26A007947P1	Prudul26A007947P2	#N/A	#N/A
Prudul26A007949P1	Prudul26A015078P1	#N/A	#N/A
Prudul26A007950P1	Prudul26A015036P1	#N/A	#N/A
Prudul26A029834P1	Prudul26A007950P1	#N/A	#N/A
Prudul26A007954P1	Prudul26A007954P2	#N/A	#N/A
Prudul26A032449P1	Prudul26A007958P1	#N/A	#N/A
Prudul26A007963P1	Prudul26A031094P1	#N/A	#N/A
Prudul26A007964P1	Prudul26A032133P1	#N/A	#N/A
Prudul26A007975P1	Prudul26A007975P2	#N/A	#N/A
Prudul26A029128P1	Prudul26A007979P1	#N/A	#N/A
Prudul26A007984P1	Prudul26A025730P1	#N/A	#N/A
Prudul26A007993P1	Prudul26A007993P2	#N/A	#N/A
Prudul26A008000P1	Prudul26A008000P2	#N/A	#N/A
Prudul26A029293P1	Prudul26A008017P1	#N/A	#N/A
Prudul26A013323P1	Prudul26A008026P1	#N/A	#N/A
Prudul26A008037P1	Prudul26A008037P2	#N/A	#N/A
Prudul26A008042P1	Prudul26A008042P2	#N/A	#N/A
Prudul26A008042P2	Prudul26A008042P3	#N/A	#N/A
Prudul26A015493P1	Prudul26A008043P1	#N/A	#N/A
Prudul26A008045P1	Prudul26A008045P2	#N/A	#N/A
Prudul26A008046P1	Prudul26A017293P1	#N/A	#N/A
Prudul26A008051P1	Prudul26A008051P2	#N/A	#N/A
Prudul26A008057P1	Prudul26A008057P2	#N/A	#N/A
Prudul26A008062P1	Prudul26A008062P2	#N/A	#N/A
Prudul26A008065P1	Prudul26A031115P1	#N/A	#N/A
Prudul26A008072P1	Prudul26A008072P2	#N/A	#N/A
Prudul26A008083P1	Prudul26A008083P2	#N/A	#N/A
Prudul26A008083P2	Prudul26A026610P1	#N/A	#N/A
Prudul26A008086P1	Prudul26A008086P2	#N/A	#N/A
Prudul26A008086P2	Prudul26A008086P3	#N/A	#N/A
Prudul26A008745P1	Prudul26A008088P1	#N/A	#N/A
Prudul26A008093P1	Prudul26A008093P2	#N/A	#N/A
Prudul26A008100P1	Prudul26A008100P2	#N/A	#N/A
Prudul26A008104P1	Prudul26A025780P1	#N/A	#N/A
Prudul26A008109P1	Prudul26A008109P2	#N/A	#N/A
Prudul26A009250P2	Prudul26A008111P1	#N/A	#N/A
Prudul26A008136P1	Prudul26A008136P2	#N/A	#N/A
Prudul26A008136P2	Prudul26A008136P3	#N/A	#N/A
Prudul26A008143P1	Prudul26A015568P1	#N/A	#N/A
Prudul26A008151P1	Prudul26A008151P2	#N/A	#N/A
Prudul26A008167P1	Prudul26A008167P2	#N/A	#N/A
Prudul26A008167P2	Prudul26A008167P3	#N/A	#N/A
Prudul26A008167P3	Prudul26A014681P1	#N/A	#N/A
Prudul26A016766P1	Prudul26A008171P1	#N/A	#N/A
Prudul26A008171P1	Prudul26A025217P1	#N/A	#N/A
Prudul26A012968P1	Prudul26A008179P1	#N/A	#N/A
Prudul26A013017P1	Prudul26A008184P1	#N/A	#N/A
Prudul26A008192P1	Prudul26A008192P2	#N/A	#N/A
Prudul26A008194P1	Prudul26A008194P2	#N/A	#N/A
Prudul26A008203P1	Prudul26A017375P1	#N/A	#N/A
Prudul26A031075P2	Prudul26A008203P1	#N/A	#N/A
Prudul26A008214P1	Prudul26A031798P1	#N/A	#N/A
Prudul26A008224P1	Prudul26A008224P2	#N/A	#N/A
Prudul26A027649P1	Prudul26A008224P1	#N/A	#N/A
Prudul26A021227P1	Prudul26A008232P1	#N/A	#N/A
Prudul26A008232P1	Prudul26A029390P1	#N/A	#N/A
Prudul26A008246P1	Prudul26A008246P2	#N/A	#N/A
Prudul26A008248P1	Prudul26A008248P2	#N/A	#N/A
Prudul26A031855P1	Prudul26A008268P1	#N/A	#N/A
Prudul26A008275P1	Prudul26A008275P2	#N/A	#N/A
Prudul26A008278P1	Prudul26A008278P2	#N/A	#N/A
Prudul26A008286P1	Prudul26A025669P1	#N/A	#N/A
Prudul26A008289P1	Prudul26A012365P1	#N/A	#N/A
Prudul26A008297P1	Prudul26A008297P2	#N/A	#N/A
Prudul26A008298P1	Prudul26A032624P1	#N/A	#N/A
Prudul26A008307P1	Prudul26A008307P2	#N/A	#N/A
Prudul26A008312P1	Prudul26A008312P2	#N/A	#N/A
Prudul26A008322P1	Prudul26A008322P2	#N/A	#N/A
Prudul26A008327P1	Prudul26A008327P2	#N/A	#N/A
Prudul26A008327P2	Prudul26A029666P1	#N/A	#N/A
Prudul26A017749P1	Prudul26A008332P1	#N/A	#N/A
Prudul26A008334P1	Prudul26A008334P2	#N/A	#N/A
Prudul26A008362P1	Prudul26A008362P2	#N/A	#N/A
Prudul26A008377P1	Prudul26A008377P2	#N/A	#N/A
Prudul26A019673P2	Prudul26A008377P1	#N/A	#N/A
Prudul26A008380P1	Prudul26A008380P2	#N/A	#N/A
Prudul26A019692P1	Prudul26A008380P1	#N/A	#N/A
Prudul26A022199P1	Prudul26A008386P1	#N/A	#N/A
Prudul26A017803P1	Prudul26A008402P1	#N/A	#N/A
Prudul26A008415P1	Prudul26A008415P2	#N/A	#N/A
Prudul26A008420P1	Prudul26A008420P2	#N/A	#N/A
Prudul26A008420P2	Prudul26A008420P3	#N/A	#N/A
Prudul26A017638P1	Prudul26A008422P1	#N/A	#N/A
Prudul26A008428P1	Prudul26A008428P2	#N/A	#N/A
Prudul26A008428P2	Prudul26A008428P3	#N/A	#N/A
Prudul26A008437P1	Prudul26A008437P2	#N/A	#N/A
Prudul26A008448P1	Prudul26A008448P2	#N/A	#N/A
Prudul26A008448P2	Prudul26A008448P3	#N/A	#N/A
Prudul26A008452P1	Prudul26A008452P2	#N/A	#N/A
Prudul26A008468P1	Prudul26A008468P2	#N/A	#N/A
Prudul26A008468P2	Prudul26A008468P3	#N/A	#N/A
[truncated: 4,316 more rows]
