# Supplementary material for: Characterization of the WRKY gene family reveals its contribution to the adaptability of almond (Prunus dulcis)
Source: PeerJ. 2022 Jul 4;10:e13491. doi: 10.7717/peerj.13491 (PMC9261925; doi:10.7717/peerj.13491)
Supplement: Supplemental Information 8 [file peerj-10-13491-s008.xlsx]

## Sheet: Sheet1
Orthologous relationships of WRKY genes between almond and other six plant species
P.dulcis VS A.thaliana			P.dulcis VS M.domestica			P.dulcis VS P.persica			P.dulcis VS P.armeniaca			P.dulcis VS P.avium			P.dulcis VS R.chinensis
Prudul26A007647P1	AT1G69310.1		Prudul26A007596P1	mRNA:MD13G0108800		Prudul26A015786P1	ONI27161		Prudul26A013051P1	PARG07414m01		Prudul26A015786P1	FUN_000738-T1		Prudul26A028617P1	PRQ40836
Prudul26A005095P1	AT1G13960.1		Prudul26A005095P1	mRNA:MD13G0059600		Prudul26A020687P1	ONI27978		Prudul26A001657P1	PARG07544m01		Prudul26A020687P1	FUN_001276-T1		Prudul26A005095P1	PRQ40711
Prudul26A005095P1	AT2G03340.1		Prudul26A007647P1	mRNA:MD13G0057200		Prudul26A007596P1	ONI29932		Prudul26A027240P1	PARG07759m01		Prudul26A013051P1	FUN_005527-T1		Prudul26A007647P1	PRQ40678
Prudul26A024381P2	AT2G24570.1		Prudul26A020687P1	mRNA:MD13G0134000		Prudul26A028617P1	ONI30720		Prudul26A020687P1	PARG04493m01		Prudul26A006215P1	FUN_005528-T1		Prudul26A020687P1	PRQ39491
Prudul26A013051P1	AT2G25000.1		Prudul26A015786P1	mRNA:MD13G0208400		Prudul26A005095P1	ONI30905		Prudul26A015786P1	PARG03993m01		Prudul26A001657P1	FUN_039966-T1		Prudul26A007596P1	PRQ39862
Prudul26A013051P1	AT4G31800.1		Prudul26A013051P1	mRNA:MD15G0034800		Prudul26A007647P1	ONI30950		Prudul26A028617P1	PARG06285m01		Prudul26A027240P1	FUN_005942-T1		Prudul26A015786P1	PRQ37090
Prudul26A024381P2	AT4G31550.2		Prudul26A006215P1	mRNA:MD15G0034900		Prudul26A013051P1	ONI32905		Prudul26A005095P1	PARG06510m01		Prudul26A007596P1	FUN_003499-T1		Prudul26A013051P1	PRQ26893
Prudul26A007596P1	AT5G13080.1		Prudul26A001657P1	mRNA:MD15G0046900		Prudul26A006215P1	ONI32906		Prudul26A007647P1	PARG06540m01		Prudul26A015240P1	FUN_007499-T1		Prudul26A006215P1	PRQ26892
Prudul26A020687P1	AT5G49520.1		Prudul26A027240P1	mRNA:MD15G0068200		Prudul26A001657P1	ONI33128		Prudul26A007596P1	PARG05805m01		Prudul26A028617P1	FUN_004133-T1		Prudul26A001657P1	PRQ28007
Prudul26A012059P1	AT2G40750.1		Prudul26A024381P1	mRNA:MD15G0091900		Prudul26A027240P1	ONI33533		Prudul26A031546P1	PARG18374m01		Prudul26A005095P1	FUN_039946-T1		Prudul26A027240P1	PRQ27739
Prudul26A020675P1	AT2G46130.1		Prudul26A015240P1	mRNA:MD15G0355200		Prudul26A015240P1	ONI36006		Prudul26A020675P1	PARG18379m01		Prudul26A007647P1	FUN_004299-T1		Prudul26A024381P1	PRQ27418
Prudul26A001975P1	AT2G46400.1		Prudul26A028617P1	mRNA:MD16G0069000		Prudul26A019680P1	ONI25426		Prudul26A001975P1	PARG18453m01		Prudul26A019680P1	FUN_012886-T1		Prudul26A019680P1	PRQ60203
Prudul26A013566P1	AT2G44745.1		Prudul26A005095P1	mRNA:MD16G0059500		Prudul26A013566P1	ONI22507		Prudul26A013566P1	PARG17946m01		Prudul26A031546P1	FUN_011489-T1		Prudul26A031546P1	PRQ58289
Prudul26A012059P1	AT3G56400.1		Prudul26A007647P1	mRNA:MD16G0056700		Prudul26A031546P1	ONI23252		Prudul26A022804P1	PARG18905m01		Prudul26A001975P1	FUN_011575-T1		Prudul26A020675P1	PRQ58297
Prudul26A019680P1	AT5G52830.1		Prudul26A020687P1	mRNA:MD16G0133400		Prudul26A020675P1	ONI23256		Prudul26A019680P1	PARG19547m01		Prudul26A022804P1	FUN_012119-T1		Prudul26A001975P1	PRQ58416
Prudul26A032520P1	AT1G80840.1		Prudul26A015786P1	mRNA:MD16G0209200		Prudul26A001975P1	ONI23372		Prudul26A017436P1	PARG19171m01		Prudul26A017436P1	FUN_012474-T1		Prudul26A013566P1	PRQ57418
Prudul26A031374P1	AT2G47260.1		Prudul26A027240P1	mRNA:MD08G0079900		Prudul26A022804P1	ONI24250		Prudul26A012059P1	PARG19170m01		Prudul26A012059P1	FUN_012475-T1		Prudul26A017436P1	PRQ59641
Prudul26A029053P1	AT2G04880.2		Prudul26A024381P1	mRNA:MD08G0108500		Prudul26A017436P1	ONI24834		Prudul26A005633P1	PARG13152m01		Prudul26A006177P1	FUN_013368-T1		Prudul26A012059P1	PRQ59642
Prudul26A030807P1	AT3G01970.1		Prudul26A001657P1	mRNA:MD08G0058500		Prudul26A012059P1	ONI24835		Prudul26A021325P1	PARG13075m01		Prudul26A031374P1	FUN_013456-T1		Prudul26A029053P1	PRQ52554
Prudul26A006177P1	AT4G01720.1		Prudul26A015240P1	mRNA:MD08G0188900		Prudul26A005633P1	ONI19153		Prudul26A030807P1	PARG12740m01		Prudul26A030807P1	FUN_017845-T1		Prudul26A028388P1	PRQ52747
Prudul26A028388P1	AT4G04450.1		Prudul26A019680P1	mRNA:MD01G0173200		Prudul26A021325P1	ONI19307		Prudul26A029053P1	PARG13871m01		Prudul26A032520P1	FUN_014599-T1		Prudul26A032520P1	PRQ50421
Prudul26A028388P1	AT4G22070.1		Prudul26A031546P1	mRNA:MD01G0053700		Prudul26A030807P1	ONI19965		Prudul26A032520P1	PARG15232m01		Prudul26A005971P1	FUN_015041-T1		Prudul26A005971P1	PRQ50230
Prudul26A021325P1	AT5G15130.1		Prudul26A020675P1	mRNA:MD01G0054000		Prudul26A006177P1	ONI14686		Prudul26A022742P1	PARG14169m01		Prudul26A029053P1	FUN_016549-T1		Prudul26A021325P1	PRQ53664
Prudul26A017718P1	AT1G62300.1		Prudul26A001975P1	mRNA:MD01G0059700		Prudul26A031374P1	ONI14789		Prudul26A005971P1	PARG15119m01		Prudul26A028388P1	FUN_016706-T1		Prudul26A005633P1	PRQ53481
Prudul26A030482P1	AT1G30650.1		Prudul26A022804P1	mRNA:MD01G0098100		Prudul26A032520P1	ONI16439		Prudul26A006177P1	PARG16211m01		Prudul26A021325P1	FUN_017488-T1		Prudul26A022742P1	PRQ52085
Prudul26A017718P1	AT4G22070.1		Prudul26A017436P1	mRNA:MD01G0136300		Prudul26A005971P1	ONI16657		Prudul26A031374P1	PARG16143m01		Prudul26A001748P1	FUN_034313-T1		Prudul26A030807P1	PRQ54294
Prudul26A017718P1	AT4G04450.1		Prudul26A012059P1	mRNA:MD01G0136400		Prudul26A022742P1	ONI17688		Prudul26A001748P1	PARG10336m01		Prudul26A012168P1	FUN_032252-T1		Prudul26A006177P1	PRQ45030
Prudul26A030043P1	AT5G46350.1		Prudul26A012059P1	mRNA:MD07G0193800		Prudul26A029053P1	ONI18198		Prudul26A017718P1	PARG12520m01		Prudul26A012168P1	FUN_032281-T1		Prudul26A031374P1	PRQ45163
Prudul26A023213P1	AT4G23810.1		Prudul26A001975P1	mRNA:MD07G0120500		Prudul26A028388P1	ONI18424		Prudul26A027932P1	PARG10282m02		Prudul26A030043P1	FUN_040264-T1		Prudul26A030482P1	PRQ29826
Prudul26A023213P1	AT4G11070.1		Prudul26A013566P1	mRNA:MD07G0090300		Prudul26A001748P1	ONI13366		Prudul26A012168P1	PARG12027m01		Prudul26A030482P1	FUN_032653-T1		Prudul26A017718P1	PRQ28392
Prudul26A023323P1	AT4G23550.1		Prudul26A021325P1	mRNA:MD17G0042300		Prudul26A027932P1	ONI13594		Prudul26A030043P1	PARG11955m01		Prudul26A017718P1	FUN_031679-T1		Prudul26A012168P1	PRQ29222
Prudul26A028352P1	AT2G30250.1		Prudul26A032520P1	mRNA:MD17G0190600		Prudul26A017718P1	ONI09905		Prudul26A030482P1	PARG11680m01		Prudul26A030482P1	FUN_032730-T1		Prudul26A030043P1	PRQ29367
Prudul26A031132P1	AT2G37260.1		Prudul26A022742P1	mRNA:MD17G0120600		Prudul26A012168P1	ONI10755		Prudul26A014175P1	PARG24382m01		Prudul26A027932P1	FUN_034563-T1		Prudul26A001748P1	PRQ31927
Prudul26A012395P1	AT2G23320.1		Prudul26A028388P1	mRNA:MD17G0086200		Prudul26A030043P1	ONI10917		Prudul26A019298P1	PARG24770m01		Prudul26A027932P1	FUN_034492-T1		Prudul26A027932P1	PRQ32097
Prudul26A004090P1	AT2G38470.1		Prudul26A005633P1	mRNA:MD17G0047500		Prudul26A030482P1	ONI11313		Prudul26A023213P1	PARG23999m01		Prudul26A019298P1	FUN_026120-T1		Prudul26A023323P1	PRQ17584
Prudul26A030389P1	AT3G04670.1		Prudul26A031374P1	mRNA:MD17G0237400		Prudul26A001568P1	ONI06683		Prudul26A030389P1	PARG03107m01		Prudul26A014175P1	FUN_025635-T1		Prudul26A023213P1	PRQ17455
Prudul26A021799P1	AT5G56270.1		Prudul26A022742P1	mRNA:MD09G0130600		Prudul26A023323P1	ONI07215		Prudul26A012395P1	PARG02169m01		Prudul26A019298P1	FUN_026058-T1		Prudul26A014175P1	PRQ16950
Prudul26A018032P1	AT5G64810.1		Prudul26A029053P1	mRNA:MD09G0105800		Prudul26A023213P1	ONI07390		Prudul26A031132P1	PARG02307m01		Prudul26A001568P1	FUN_024826-T1		Prudul26A001568P1	PRQ18143
			Prudul26A028388P1	mRNA:MD09G0096600		Prudul26A014175P1	ONI07942		Prudul26A021799P1	PARG00312m01		Prudul26A023323P1	FUN_025170-T1		Prudul26A019298P1	PRQ16120
			Prudul26A005633P1	mRNA:MD09G0051100		Prudul26A019298P1	ONI08596		Prudul26A022589P1	PARG03298m01		Prudul26A023213P1	FUN_025283-T1		Prudul26A012395P1	PRQ48045
			Prudul26A021325P1	mRNA:MD09G0043000		Prudul26A021799P1	ONH99565		Prudul26A018032P1	PARG02523m01		Prudul26A028352P1	FUN_018800-T1		Prudul26A018032P1	PRQ49015
			Prudul26A030807P1	mRNA:MD09G0007900		Prudul26A028352P1	ONH99740		Prudul26A011586P1	PARG29166m01		Prudul26A018032P1	FUN_040131-T1		Prudul26A008567P1	PRQ42688
			Prudul26A031374P1	mRNA:MD09G0243300		Prudul26A018032P1	ONI01969		Prudul26A002073P1	PARG29165m01		Prudul26A012395P1	FUN_021616-T1		Prudul26A030389P1	PRQ41792
			Prudul26A005971P1	mRNA:MD09G0202900		Prudul26A012395P1	ONI02948		Prudul26A008567P1	PARG29164m01		Prudul26A031132P1	FUN_021758-T1		Prudul26A022589P1	PRQ41534
			Prudul26A017718P1	mRNA:MD10G0276700		Prudul26A031132P1	ONI03194		Prudul26A030641P1	PARG28284m01		Prudul26A027479P1	FUN_021949-T1		Prudul26A031132P1	PRQ43414
			Prudul26A030043P1	mRNA:MD10G0223900		Prudul26A027479P1	ONI03453		Prudul26A023218P1	PARG19859m01		Prudul26A004090P1	FUN_022292-T1		Prudul26A027479P1	PRQ43243
			Prudul26A030482P1	mRNA:MD10G0202700		Prudul26A004090P1	ONI03852					Prudul26A011586P1	FUN_022379-T1		Prudul26A004090P1	PRQ42789
			Prudul26A001748P1	mRNA:MD11G0170400		Prudul26A011586P1	ONI03981					Prudul26A002073P1	FUN_022380-T1		Prudul26A021799P1	PRQ34920
			Prudul26A027932P1	mRNA:MD11G0162400		Prudul26A002073P1	ONI03982					Prudul26A008567P1	FUN_022382-T1		Prudul26A028352P1	PRQ34683
			Prudul26A001748P1	mRNA:MD03G0162000		Prudul26A008567P1	ONI03983					Prudul26A030389P1	FUN_022925-T1		Prudul26A030641P1	PRQ46124
			Prudul26A027932P1	mRNA:MD03G0154200		Prudul26A030389P1	ONI04871					Prudul26A022589P1	FUN_023094-T1		Prudul26A009578P1	PRQ25953
			Prudul26A012168P1	mRNA:MD05G0248800		Prudul26A022589P1	ONI05193					Prudul26A030641P1	FUN_039785-T1
			Prudul26A030043P1	mRNA:MD05G0244300		Prudul26A030641P1	ONH98706					Prudul26A009578P1	FUN_031020-T1
			Prudul26A030482P1	mRNA:MD05G0222800		Prudul26A009578P1	ONH93413					Prudul26A023218P1	FUN_031389-T1
			Prudul26A017718P2	mRNA:MD05G0293000		Prudul26A023218P1	ONH94010
			Prudul26A014175P1	mRNA:MD14G0133400
			Prudul26A019298P1	mRNA:MD14G0170100
			Prudul26A023323P1	mRNA:MD14G0097800
			Prudul26A019298P1	mRNA:MD06G0155600
			Prudul26A023323P1	mRNA:MD06G0073800
			Prudul26A023213P1	mRNA:MD06G0083600
			Prudul26A014175P1	mRNA:MD06G0112600
			Prudul26A001568P1	mRNA:MD06G0051500
			Prudul26A028352P1	mRNA:MD11G0048800
			Prudul26A031132P1	mRNA:MD12G0106700
			Prudul26A027479P1	mRNA:MD12G0118800
			Prudul26A004090P1	mRNA:MD12G0148900
			Prudul26A008567P1	mRNA:MD12G0156700
			Prudul26A022589P1	mRNA:MD12G0218900
			Prudul26A018032P1	mRNA:MD15G0287400
			Prudul26A012395P1	mRNA:MD15G0250300
			Prudul26A012395P1	mRNA:MD02G0152000
			Prudul26A021799P1	mRNA:MD03G0036200
			Prudul26A028352P1	mRNA:MD03G0048200
			Prudul26A027479P1	mRNA:MD04G0103700
			Prudul26A004090P1	mRNA:MD04G0133500
			Prudul26A022589P1	mRNA:MD04G0185200
			Prudul26A030389P1	mRNA:MD04G0195100
			Prudul26A030641P1	mRNA:MD15G0134100
			Prudul26A009578P1	mRNA:MD10G0162200
			Prudul26A023218P1	mRNA:MD03G0240400
			Prudul26A009578P1	mRNA:MD05G0170900
