# Supplementary material for: Characterization of the WRKY gene family reveals its contribution to the adaptability of almond (Prunus dulcis)
Source: PeerJ. 2022 Jul 4;10:e13491. doi: 10.7717/peerj.13491 (PMC9261925; doi:10.7717/peerj.13491)
Supplement: Supplemental Information 9 [file peerj-10-13491-s009.xlsx]

## Sheet: sheet1
WRKY genes replication and homologous gene Ka/Ks values in almond
Segmental duplication						Tandem duplication						P.dulcis VS A.thaliana						P.dulcis VS M.domestica						P.dulcis VS P.persica						P.dulcis VS P.avium						P.dulcis VS P.armeniaca						P.dulcis VS R.chinensis
Seq_1	Seq_2	Ka	Ks	Ka/Ks		Seq_1	Seq_2	Ka	Ks	Ka/Ks		Seq_1	Seq_2	Ka	Ks	Ka/Ks		Seq_1	Seq_2	Ka	Ks	Ka/Ks		Seq_1	Seq_2	Ka	Ks	Ka/Ks		Seq_1	Seq_2	Ka	Ks	Ka/Ks		Seq_1	Seq_2	Ka	Ks	Ka/Ks		Seq_1	Seq_2	Ka	Ks	Ka/Ks
Prudul26A020687C1	Prudul26A031374C1	0.379013	3.52802	0.107429		Prudul26A002073C1	Prudul26A008567C1	0.127358	0.299871	0.424711		Prudul26A007647C1	AT1G69310.1	0.395541	2.57108	0.153842		Prudul26A007596C1	mRNA:MD13G0108800	0.0813296	0.473627	0.171716		Prudul26A015786C1	ONI27161	0.00640687	0.0144235	0.444196		Prudul26A015786C1	FUN_000738-T1	0.0128759	0.0697019	0.184728		Prudul26A001657C1	PARG07544m01	0.0159087	0.0416051	0.382373		Prudul26A028617C1	PRQ40836	0.212881	0.500113	0.425665
Prudul26A007596C1	Prudul26A030807C1	0.313548	1.89778	0.165218		Prudul26A011586C1	Prudul26A002073C1	0.261259	0.51986	0.502556		Prudul26A005095C1	AT1G13960.1	0.274511	2.09708	0.130901		Prudul26A005095C1	mRNA:MD13G0059600	0.0965879	0.478278	0.201949		Prudul26A020687C1	ONI27978	0.00111711	0.00749538	0.14904		Prudul26A020687C1	FUN_001276-T1	0.0112763	0.0462574	0.243772		Prudul26A027240C1	PARG07759m01	0.0245907	0.0775449	0.317115		Prudul26A005095C1	PRQ40711	0.13985	0.726312	0.192548
Prudul26A021325C1	Prudul26A028617C1	0.437418	1.09274	0.400293		Prudul26A005633C1	Prudul26A005633C2	0.0330568	0.0454409	0.727468		Prudul26A005095C1	AT2G03340.1	0.287981	3.35819	0.0857549		Prudul26A007647C1	mRNA:MD13G0057200	0.221471	0.545191	0.406227		Prudul26A007596C1	ONI29932	0.00468843	0.0167022	0.280708		Prudul26A013051C1	FUN_005527-T1	0.0159722	0.0628387	0.254178		Prudul26A028617C1	PARG06285m01	0.0258311	0.0706842	0.365443		Prudul26A007647C1	PRQ40678	0.216519	0.599434	0.361205
Prudul26A019298C1	Prudul26A028617C1	0.469248	1.30871	0.358559		Prudul26A013051C2	Prudul26A006215C1	0.668742	1.96506	0.340316		Prudul26A024381C2	AT2G24570.1	0.183623	NaN	NaN		Prudul26A020687C1	mRNA:MD13G0134000	0.108382	0.618737	0.175166		Prudul26A028617C1	ONI30720	0.00693086	0.0289541	0.239374		Prudul26A006215C1	FUN_005528-T1	0.0280406	0.0547689	0.511982		Prudul26A005095C1	PARG06510m01	0.0129276	0.0220199	0.587088		Prudul26A020687C1	PRQ39491	0.222121	1.30223	0.17057
Prudul26A005095C1	Prudul26A005633C1	0.274059	1.1858	0.231117		Prudul26A013051C1	Prudul26A013051C2	0.00813498	0.014648	0.555364		Prudul26A013051C1	AT2G25000.1	0.470421	1.53125	0.307213		Prudul26A015786C1	mRNA:MD13G0208400	0.121014	0.465571	0.259927		Prudul26A005095C1	ONI30905	0.01028	0.0191791	0.535999		Prudul26A001657C1	FUN_039966-T1	0.0212686	0.0974341	0.218287		Prudul26A007647C1	PARG06540m01	NaN	NaN	NaN		Prudul26A007596C1	PRQ39862	0.0936202	0.808959	0.115729
Prudul26A013051C1	Prudul26A032520C1	0.477774	1.54746	0.308746								Prudul26A013051C1	AT4G31800.1	0.445882	3.64097	0.122462		Prudul26A013051C1	mRNA:MD15G0034800	0.138583	0.474167	0.292265		Prudul26A007647C1	ONI30950	0.00937408	0.0262513	0.35709		Prudul26A027240C1	FUN_005942-T1	0.0245856	0.0691146	0.355722		Prudul26A007596C1	PARG05805m01	0.0117696	0.0338562	0.347633		Prudul26A015786C1	PRQ37090	0.105783	0.81609	0.129622
Prudul26A019680C1	Prudul26A031546C1	0.560524	1.73154	0.323714								Prudul26A024381C2	AT4G31550.2	0.237684	1.94947	0.121922		Prudul26A006215C1	mRNA:MD15G0034900	0.191721	0.59402	0.322752		Prudul26A013051C1	ONI32905	0.00660434	0.0236706	0.27901		Prudul26A007596C1	FUN_003499-T1	0.0165949	0.0609915	0.272086		Prudul26A020675C1	PARG18379m01	0.00802147	0.0463724	0.172979		Prudul26A013051C1	PRQ26893	0.286831	0.898596	0.319199
Prudul26A001975C1	Prudul26A023213C1	0.521839	1.38038	0.378039								Prudul26A007596C1	AT5G13080.1	0.282934	2.05807	0.137476		Prudul26A001657C1	mRNA:MD15G0046900	0.122722	0.399974	0.306825		Prudul26A006215C1	ONI32906	0.00979206	0.0159369	0.614429		Prudul26A015240C1	FUN_007499-T1	0.0195962	0.0576376	0.339989		Prudul26A001975C1	PARG18453m01	NaN	NaN	NaN		Prudul26A006215C1	PRQ26892	0.390259	0.835529	0.467081
Prudul26A011586C1	Prudul26A012059C1	0.624871	2.0602	0.303305								Prudul26A020687C1	AT5G49520.1	0.51996	NaN	NaN		Prudul26A027240C1	mRNA:MD15G0068200	0.0983085	0.712945	0.137891		Prudul26A001657C1	ONI33128	0.00456275	0.0355096	0.128494		Prudul26A028617C1	FUN_004133-T1	0.0246892	0.0565958	0.436238		Prudul26A013566C1	PARG17946m01	0.00220063	0.0436487	0.0504168		Prudul26A001657C1	PRQ28007	0.143327	0.453164	0.316281
Prudul26A019680C1	Prudul26A023323C1	0.55822	1.64123	0.340123								Prudul26A012059C1	AT2G40750.1	0.749548	1.66466	0.450272		Prudul26A024381C1	mRNA:MD15G0091900	0.0875908	0.60675	0.144361		Prudul26A027240C1	ONI33533	0.0199238	0.0266753	0.746902		Prudul26A005095C1	FUN_039946-T1	0.0181343	0.041687	0.43501		Prudul26A022804C1	PARG18905m01	0.00625438	0	#NAME?		Prudul26A027240C1	PRQ27739	0.148957	0.853919	0.17444
Prudul26A005971C1	Prudul26A012168C1	0.383435	2.62674	0.145974								Prudul26A020675C1	AT2G46130.1	0.159135	0.754497	0.210916		Prudul26A015240C1	mRNA:MD15G0355200	0.155116	0.479628	0.323409		Prudul26A015240C1	ONI36006	0.0092463	0.0250603	0.368961		Prudul26A007647C1	FUN_004299-T1	0.0216037	0.0816515	0.264584		Prudul26A019680C1	PARG19547m01	0.0123114	0.0345993	0.355828		Prudul26A024381C1	PRQ27418	0.139593	0.874974	0.15954
Prudul26A022742C1	Prudul26A030043C1	0.412551	3.4973	0.117963								Prudul26A001975C1	AT2G46400.1	0.518514	4.20974	0.12317		Prudul26A028617C1	mRNA:MD16G0069000	0.146513	0.524006	0.279602		Prudul26A019680C1	ONI25426	0.00444117	0.0189884	0.233889		Prudul26A019680C1	FUN_012886-T1	0.0179818	0.0504392	0.356504		Prudul26A017436C1	PARG19171m01	0.0390743	0.0781528	0.499973		Prudul26A019680C1	PRQ60203	0.344976	1.42494	0.242099
Prudul26A027932C1	Prudul26A029053C1	0.656089	1.48833	0.440823								Prudul26A013566C1	AT2G44745.1	0.415218	2.49198	0.166622		Prudul26A005095C1	mRNA:MD16G0059500	0.0949419	0.457151	0.207682		Prudul26A013566C1	ONI22507	0.0689229	0.137391	0.501656		Prudul26A031546C1	FUN_011489-T1	0.290807	0.35887	0.810341		Prudul26A021325C1	PARG13075m01	0.0140736	0.0289262	0.486533		Prudul26A031546C1	PRQ58289	0.259964	0.821782	0.316341
Prudul26A017718C1	Prudul26A028388C1	0.335071	2.68811	0.124649								Prudul26A012059C1	AT3G56400.1	0.603992	2.65624	0.227386		Prudul26A007647C1	mRNA:MD16G0056700	0.238302	0.564319	0.422283		Prudul26A031546C1	ONI23252	0.00367798	0.0163494	0.224961		Prudul26A001975C1	FUN_011575-T1	0.0212536	0.0342794	0.620011		Prudul26A006177C1	PARG16211m01	0.0240268	0.0510629	0.470534		Prudul26A020675C1	PRQ58297	0.206282	0.672989	0.306516
Prudul26A001748C1	Prudul26A028388C1	0.325982	1.63064	0.19991								Prudul26A019680C1	AT5G52830.1	0.456308	NaN	NaN		Prudul26A020687C1	mRNA:MD16G0133400	0.120888	0.62476	0.193494		Prudul26A020675C1	ONI23256	0.00600604	0.0464237	0.129375		Prudul26A022804C1	FUN_012119-T1	0.0277284	0.112447	0.246591		Prudul26A001748C1	PARG10336m01	0.00635261	0.0565239	0.112388		Prudul26A001975C1	PRQ58416	0.187819	0.423756	0.443225
Prudul26A019298C1	Prudul26A021325C1	0.461093	1.1286	0.408553								Prudul26A032520C1	AT1G80840.1	0.385152	1.67056	0.230553		Prudul26A015786C1	mRNA:MD16G0209200	0.0971895	0.492671	0.197271		Prudul26A001975C1	ONI23372	0.00608893	0.0166097	0.366589		Prudul26A017436C1	FUN_012474-T1	0.03679	0.0525955	0.699489		Prudul26A017718C1	PARG12520m01	0.00563119	0.0449012	0.125413		Prudul26A013566C1	PRQ57418	0.266966	0.755848	0.353201
Prudul26A014175C1	Prudul26A030807C1	0.310983	1.40981	0.220585								Prudul26A031374C1	AT2G47260.1	0.419858	2.02259	0.207584		Prudul26A027240C1	mRNA:MD08G0079900	0.0916442	0.813856	0.112605		Prudul26A022804C1	ONI24250	0.00416234	0	#NAME?		Prudul26A012059C1	FUN_012475-T1	0.0243924	0.0636597	0.383168		Prudul26A027932C1	PARG10282m02	0.00978377	0.0396213	0.246932		Prudul26A017436C1	PRQ59641	0.316876	0.836441	0.378838
Prudul26A001748C1	Prudul26A017718C1	0.405965	2.44428	0.166088								Prudul26A029053C1	AT2G04880.2	0.553977	1.59463	0.347401		Prudul26A024381C1	mRNA:MD08G0108500	0.0560271	0.600109	0.0933616		Prudul26A017436C1	ONI24834	0.00764686	0.0229976	0.332506		Prudul26A006177C1	FUN_013368-T1	0.0231358	0.0531945	0.434928		Prudul26A012168C1	PARG12027m01	1.40251	1.51715	0.924434		Prudul26A012059C1	PRQ59642	0.266535	0.800482	0.332968
Prudul26A011586C1	Prudul26A023213C1	0.845139	3.97249	0.212748								Prudul26A030807C1	AT3G01970.1	0.313776	NaN	NaN		Prudul26A001657C1	mRNA:MD08G0058500	0.148855	0.485874	0.306365		Prudul26A012059C1	ONI24835	0.00266608	0.0289192	0.0921904		Prudul26A031374C1	FUN_013456-T1	0.0122493	0.0282719	0.433269		Prudul26A030482C1	PARG11680m01	NaN	NaN	NaN		Prudul26A029053C1	PRQ52554	0.156155	0.362876	0.430326
Prudul26A004090C1	Prudul26A028352C1	0.320878	1.35056	0.237588								Prudul26A006177C1	AT4G01720.1	0.514393	NaN	NaN		Prudul26A015240C1	mRNA:MD08G0188900	0.178299	0.440003	0.405221		Prudul26A005633C1	ONI19153	0.0049529	0.0187719	0.263846		Prudul26A030807C1	FUN_017845-T1	0.00971674	0.0647496	0.150066		Prudul26A014175C1	PARG24382m01	0.00767597	0.027484	0.279289		Prudul26A028388C1	PRQ52747	0.107515	0.693678	0.154992
Prudul26A009578C1	Prudul26A030389C1	0.266674	1.45814	0.182886								Prudul26A028388C1	AT4G04450.1	0.37804	NaN	NaN		Prudul26A019680C1	mRNA:MD01G0173200	0.21112	0.564646	0.373899		Prudul26A021325C1	ONI19307	0.00523791	0.0288358	0.181646		Prudul26A032520C1	FUN_014599-T1	0.00543912	0.0187583	0.289958		Prudul26A019298C1	PARG24770m01	0.0173762	0.0596231	0.291435		Prudul26A032520C1	PRQ50421	0.0627776	0.474307	0.132356
												Prudul26A028388C1	AT4G22070.1	0.352231	NaN	NaN		Prudul26A031546C1	mRNA:MD01G0053700	0.144882	0.459014	0.315638		Prudul26A030807C1	ONI19965	0.00193424	0.0209316	0.0924075		Prudul26A005971C1	FUN_015041-T1	0.0198715	0.0792817	0.250644		Prudul26A021799C1	PARG00312m01	0.00355609	0.0272713	0.130397		Prudul26A005971C1	PRQ50230	0.178625	0.567342	0.314845
												Prudul26A021325C1	AT5G15130.1	0.52917	1.80944	0.292449		Prudul26A020675C1	mRNA:MD01G0054000	0.180262	0.643733	0.280027		Prudul26A006177C1	ONI14686	0.00588888	0.02216	0.265744		Prudul26A029053C1	FUN_016549-T1	0.00722679	0.030034	0.24062		Prudul26A022589C1	PARG03298m01	0.00562688	0.0351	0.16031		Prudul26A021325C1	PRQ53664	0.248656	0.620971	0.40043
												Prudul26A017718C1	AT1G62300.1	0.312645	NaN	NaN		Prudul26A001975C1	mRNA:MD01G0059700	0.123185	0.403435	0.30534		Prudul26A031374C1	ONI14789	0.00541702	0.00464578	1.16601		Prudul26A028388C1	FUN_016706-T1	0.00668528	0.0374055	0.178725		Prudul26A018032C1	PARG02523m01	0.0132698	0.0408264	0.32503		Prudul26A005633C1	PRQ53481	0.136273	0.461585	0.295228
												Prudul26A030482C1	AT1G30650.1	0.428788	NaN	NaN		Prudul26A022804C1	mRNA:MD01G0098100	0.259007	0.531245	0.487548		Prudul26A032520C1	ONI16439	0.0054103	0.00460124	1.17584		Prudul26A021325C1	FUN_017488-T1	0.0122756	0.034772	0.353031		Prudul26A011586C1	PARG29166m01	0.0267711	0.0458711	0.583615		Prudul26A022742C1	PRQ52085	0.174297	0.562053	0.310107
												Prudul26A017718C1	AT4G22070.1	0.323587	NaN	NaN		Prudul26A017436C1	mRNA:MD01G0136300	0.166823	0.571605	0.29185		Prudul26A005971C1	ONI16657	0.00656819	0.0385406	0.170423		Prudul26A001748C1	FUN_034313-T1	0.0120075	0.033455	0.358914		Prudul26A002073C1	PARG29165m01	0.0265859	0.075002	0.354469		Prudul26A030807C1	PRQ54294	0.222387	0.896904	0.247949
												Prudul26A017718C1	AT4G04450.1	0.325925	3.85216	0.0846083		Prudul26A012059C1	mRNA:MD01G0136400	0.186671	0.514941	0.362509		Prudul26A022742C1	ONI17688	0.00356507	0.00872737	0.408493		Prudul26A012168C1	FUN_032252-T1	0.0170948	0.0605278	0.282428		Prudul26A008567C1	PARG29164m01	NaN	NaN	NaN		Prudul26A006177C1	PRQ45030	0.392289	0.821481	0.477539
												Prudul26A030043C1	AT5G46350.1	0.556256	NaN	NaN		Prudul26A012059C1	mRNA:MD07G0193800	0.193166	0.481731	0.400982		Prudul26A029053C1	ONI18198	0.00451775	0.03627	0.124559		Prudul26A012168C1	FUN_032281-T1	0.0155245	0.0605278	0.256485								Prudul26A031374C1	PRQ45163	0.236407	0.688966	0.343133
												Prudul26A023213C1	AT4G23810.1	0.452604	2.38418	0.189836		Prudul26A001975C1	mRNA:MD07G0120500	0.125377	0.385673	0.325087		Prudul26A028388C1	ONI18424	0.00267097	0.0208467	0.128124		Prudul26A030043C1	FUN_040264-T1	0.00781003	0.0460797	0.169489								Prudul26A030482C1	PRQ29826	0.168941	0.616082	0.274218
												Prudul26A023213C1	AT4G11070.1	0.471732	2.53222	0.186292		Prudul26A013566C1	mRNA:MD07G0090300	0.122613	0.405111	0.302666		Prudul26A001748C1	ONI13366	0.00158353	0.0248871	0.0636287		Prudul26A030482C1	FUN_032653-T1	0.0134063	0.0259517	0.516588								Prudul26A017718C1	PRQ28392	0.116785	0.855369	0.136531
												Prudul26A023323C1	AT4G23550.1	0.501757	2.53875	0.19764		Prudul26A021325C1	mRNA:MD17G0042300	0.197924	0.611155	0.323852		Prudul26A027932C1	ONI13594	0.00600867	0.0269692	0.222797		Prudul26A017718C1	FUN_031679-T1	0.0105722	0.0657262	0.160853								Prudul26A012168C1	PRQ29222	0.167838	0.784042	0.214068
												Prudul26A028352C1	AT2G30250.1	0.441998	2.22114	0.198996		Prudul26A032520C1	mRNA:MD17G0190600	0.0458719	0.321747	0.142572		Prudul26A017718C1	ONI09905	0.00139681	0.0171927	0.0812443		Prudul26A030482C1	FUN_032730-T1	0.0142522	0.0230234	0.619032								Prudul26A030043C1	PRQ29367	0.200008	0.968853	0.206438
												Prudul26A031132C1	AT2G37260.1	0.393814	2.03147	0.193856		Prudul26A022742C1	mRNA:MD17G0120600	0.148076	0.659163	0.224642		Prudul26A012168C1	ONI10755	0.00153218	0.0378459	0.0404846		Prudul26A027932C1	FUN_034563-T1	0.0185885	0.0408939	0.454556								Prudul26A001748C1	PRQ31927	0.156902	0.627914	0.249878
												Prudul26A012395C1	AT2G23320.1	0.360634	NaN	NaN		Prudul26A028388C1	mRNA:MD17G0086200	0.0794115	0.482424	0.164609		Prudul26A030043C1	ONI10917	0.0012848	0.0179113	0.0717311		Prudul26A027932C1	FUN_034492-T1	0.0128329	0.0394909	0.324959								Prudul26A027932C1	PRQ32097	0.0880174	0.327646	0.268635
												Prudul26A004090C1	AT2G38470.1	0.428833	2.113	0.20295		Prudul26A005633C1	mRNA:MD17G0047500	0.10367	0.393779	0.263268		Prudul26A030482C1	ONI11313	0.00337886	0.0057444	0.5882		Prudul26A019298C1	FUN_026120-T1	0.0185849	0.0521194	0.356583								Prudul26A023323C1	PRQ17584	0.166184	0.444667	0.373726
												Prudul26A030389C1	AT3G04670.1	0.327857	1.45493	0.225341		Prudul26A031374C1	mRNA:MD17G0237400	0.133356	0.486517	0.274103		Prudul26A001568C1	ONI06683	0.003931	0.0185052	0.212427		Prudul26A014175C1	FUN_025635-T1	0.0154778	0.0554098	0.279333								Prudul26A023213C1	PRQ17455	0.13653	0.468662	0.291318
												Prudul26A021799C1	AT5G56270.1	0.33895	1.98142	0.171064		Prudul26A022742C1	mRNA:MD09G0130600	0.103635	0.538996	0.192275		Prudul26A023323C1	ONI07215	0.00408674	0.0151584	0.269602		Prudul26A019298C1	FUN_026058-T1	0.020326	0.0492339	0.412846								Prudul26A014175C1	PRQ16950	0.171269	0.734677	0.233121
												Prudul26A018032C1	AT5G64810.1	0.366582	NaN	NaN		Prudul26A029053C1	mRNA:MD09G0105800	0.124309	0.295729	0.420347		Prudul26A023213C1	ONI07390	0.00664309	0.00931689	0.713016		Prudul26A001568C1	FUN_024826-T1	0.0128575	0.0464066	0.277061								Prudul26A001568C1	PRQ18143	0.170495	0.41191	0.413914
																		Prudul26A028388C1	mRNA:MD09G0096600	0.084767	0.470749	0.180068		Prudul26A014175C1	ONI07942	0.00255211	0.00902267	0.282855		Prudul26A023323C1	FUN_025170-T1	0.0207339	0.0306948	0.675484								Prudul26A019298C1	PRQ16120	0.161402	0.628629	0.256752
																		Prudul26A005633C1	mRNA:MD09G0051100	0.0936468	0.403166	0.232278		Prudul26A019298C1	ONI08596	0.0063922	0.0324785	0.196813		Prudul26A023213C1	FUN_025283-T1	0.0133932	0.0486897	0.275073								Prudul26A012395C1	PRQ48045	0.0855573	0.873939	0.0978985
																		Prudul26A021325C1	mRNA:MD09G0043000	0.131777	0.437773	0.301017		Prudul26A021799C1	ONH99565	0.00123546	0.00802952	0.153865		Prudul26A028352C1	FUN_018800-T1	0.00660353	0.0416322	0.158616								Prudul26A018032C1	PRQ49015	0.185234	0.583924	0.317223
																		Prudul26A030807C1	mRNA:MD09G0007900	0.123906	0.662626	0.186992		Prudul26A028352C1	ONH99740	0.00518937	0.0206687	0.251074		Prudul26A018032C1	FUN_040131-T1	0.0132527	0.0243429	0.544417								Prudul26A008567C1	PRQ42688	0.236076	0.861691	0.273969
																		Prudul26A031374C1	mRNA:MD09G0243300	0.134717	0.58824	0.229017		Prudul26A018032C1	ONI01969	0.00438999	0.0243759	0.180096		Prudul26A012395C1	FUN_021616-T1	0.00135839	0.0489425	0.0277548								Prudul26A030389C1	PRQ41792	0.189735	0.557532	0.340312
																		Prudul26A005971C1	mRNA:MD09G0202900	0.0969407	0.510287	0.189973		Prudul26A012395C1	ONI02948	0.00135839	0.0262993	0.0516512		Prudul26A031132C1	FUN_021758-T1	0.00544171	0.0415986	0.130815								Prudul26A022589C1	PRQ41534	0.108387	0.415196	0.261049
																		Prudul26A017718C1	mRNA:MD10G0276700	0.082004	0.498103	0.164633		Prudul26A031132C1	ONI03194	0.00553253	0.024605	0.224854		Prudul26A027479C1	FUN_021949-T1	0.0165341	0.0456849	0.361917								Prudul26A031132C1	PRQ43414	0.094969	0.300057	0.316503
																		Prudul26A030043C1	mRNA:MD10G0223900	0.107181	0.391191	0.273987		Prudul26A027479C1	ONI03453	0.0117997	0.0355396	0.332014		Prudul26A004090C1	FUN_022292-T1	0.0105229	0.0405211	0.259691								Prudul26A027479C1	PRQ43243	0.115535	0.661711	0.174601
																		Prudul26A030482C1	mRNA:MD10G0202700	0.1193	0.455131	0.262122		Prudul26A004090C1	ONI03852	0.00564747	0.0171029	0.330206		Prudul26A011586C1	FUN_022379-T1	0.0314493	0.0593645	0.529766								Prudul26A004090C1	PRQ42789	0.117189	0.624004	0.187801
																		Prudul26A001748C1	mRNA:MD11G0170400	0.0822148	0.338826	0.242646		Prudul26A011586C1	ONI03981	0.00899272	0.027921	0.322077		Prudul26A002073C1	FUN_022380-T1	0.0346618	0.0700993	0.494467								Prudul26A021799C1	PRQ34920	0.0573754	0.326981	0.17547
																		Prudul26A027932C1	mRNA:MD11G0162400	0.0665929	0.243733	0.27322		Prudul26A002073C1	ONI03982	0.0211328	0.0542554	0.389506		Prudul26A008567C1	FUN_022382-T1	0.0384913	0.0517244	0.744161								Prudul26A028352C1	PRQ34683	0.0878203	0.619789	0.141694
																		Prudul26A001748C1	mRNA:MD03G0162000	0.0865326	0.335922	0.257598		Prudul26A008567C1	ONI03983	0.0091246	0.0136886	0.666584		Prudul26A030389C1	FUN_022925-T1	0.0198831	0.0344517	0.57713								Prudul26A030641C1	PRQ46124	0.144535	0.468558	0.308469
																		Prudul26A027932C1	mRNA:MD03G0154200	0.0757028	0.272377	0.277933		Prudul26A030389C1	ONI04871	0.00491	0	#NAME?		Prudul26A022589C1	FUN_023094-T1	0.00771329	0.056909	0.135537								Prudul26A009578C1	PRQ25953	0.0524977	0.485277	0.108181
																		Prudul26A012168C1	mRNA:MD05G0248800	0.0847584	0.4681	0.181069		Prudul26A022589C1	ONI05193	0.00118006	0.0258389	0.0456698		Prudul26A030641C1	FUN_039785-T1	0.00821251	0.0276274	0.297259
																		Prudul26A030043C1	mRNA:MD05G0244300	0.124347	0.500705	0.248345		Prudul26A030641C1	ONH98706	0.0040939	0.0164691	0.248581		Prudul26A009578C1	FUN_031020-T1	0.0048106	0.0364536	0.131965
																		Prudul26A030482C1	mRNA:MD05G0222800	0.12728	0.477246	0.266696		Prudul26A009578C1	ONH93413	0.0012012	0.0134032	0.0896206		Prudul26A023218C1	FUN_031389-T1	0.00169996	0.0367984	0.0461965
																		Prudul26A017718C2	mRNA:MD05G0293000	0.0734839	0.586897	0.125207		Prudul26A023218C1	ONH94010	0.00170068	0.00600003	0.283445
																		Prudul26A014175C1	mRNA:MD14G0133400	0.183778	0.68854	0.266909
																		Prudul26A019298C1	mRNA:MD14G0170100	0.130535	0.443236	0.294505
																		Prudul26A023323C1	mRNA:MD14G0097800	0.111554	0.303142	0.367993
																		Prudul26A019298C1	mRNA:MD06G0155600	0.133817	0.436772	0.306378
																		Prudul26A023323C1	mRNA:MD06G0073800	0.117879	0.353112	0.33383
																		Prudul26A023213C1	mRNA:MD06G0083600	0.14877	0.406665	0.36583
																		Prudul26A014175C1	mRNA:MD06G0112600	0.225678	0.734392	0.307299
																		Prudul26A001568C1	mRNA:MD06G0051500	0.0924941	0.288956	0.320097
																		Prudul26A028352C1	mRNA:MD11G0048800	0.0684878	0.46409	0.147574
																		Prudul26A031132C1	mRNA:MD12G0106700	0.0581534	0.28449	0.204412
																		Prudul26A027479C1	mRNA:MD12G0118800	0.11817	0.776957	0.152094
																		Prudul26A004090C1	mRNA:MD12G0148900	0.0934324	0.585136	0.159676
																		Prudul26A008567C1	mRNA:MD12G0156700	0.278229	0.506605	0.549203
																		Prudul26A022589C1	mRNA:MD12G0218900	0.0884183	0.263923	0.335015
																		Prudul26A018032C1	mRNA:MD15G0287400	0.0403628	0.244988	0.164754
																		Prudul26A012395C1	mRNA:MD15G0250300	0.0490371	0.547336	0.0895923
																		Prudul26A012395C1	mRNA:MD02G0152000	0.0407308	0.556939	0.0731333
																		Prudul26A021799C1	mRNA:MD03G0036200	0.0511403	0.273844	0.18675
																		Prudul26A028352C1	mRNA:MD03G0048200	0.0763857	0.463807	0.164693
																		Prudul26A027479C1	mRNA:MD04G0103700	0.110581	0.56464	0.195843
																		Prudul26A004090C1	mRNA:MD04G0133500	0.0845558	0.63225	0.133738
																		Prudul26A022589C1	mRNA:MD04G0185200	0.0943303	0.289227	0.326147
																		Prudul26A030389C1	mRNA:MD04G0195100	0.172268	0.667381	0.258125
																		Prudul26A030641C1	mRNA:MD15G0134100	0.104538	0.363097	0.287907
																		Prudul26A009578C1	mRNA:MD10G0162200	0.0479367	0.45575	0.105182
																		Prudul26A023218C1	mRNA:MD03G0240400	0.223429	0.546939	0.408508
																		Prudul26A009578C1	mRNA:MD05G0170900	0.0415868	0.461348	0.0901421
