# Supplementary material for: Characterization of the WRKY gene family reveals its contribution to the adaptability of almond (Prunus dulcis)
Source: PeerJ. 2022 Jul 4;10:e13491. doi: 10.7717/peerj.13491 (PMC9261925; doi:10.7717/peerj.13491)
Supplement: Supplemental Information 10 [file peerj-10-13491-s010.xlsx]

## Sheet: Sheet3
kk	kk	kk	kk	kk	kk	kk	kk
PdWRKY1	AT~TATA-box	TATATAAA	625	8	-	Arabidopsis thaliana
PdWRKY1	AT~TATA-box	TATATA	627	6	+	Arabidopsis thaliana
PdWRKY1	AT~TATA-box	TATATA	1051	6	-	Arabidopsis thaliana
PdWRKY1	MYC	CATTTG	217	6	-	Arabidopsis thaliana
PdWRKY1	MYC	CATTTG	719	6	+	Arabidopsis thaliana
PdWRKY1	MYC	CATGTG	1007	6	+	Arabidopsis thaliana
PdWRKY1	MYC	CATTTG	1278	6	-	Arabidopsis thaliana
PdWRKY1	MYC	CATTTG	1501	6	+	Arabidopsis thaliana
PdWRKY1	MYC	CAATTG	1743	6	-	Arabidopsis thaliana
PdWRKY1	MYC	CATTTG	1759	6	+	Arabidopsis thaliana
PdWRKY1	MYC	CATGTG	1886	6	+	Arabidopsis thaliana
PdWRKY1	MSA-like	TCCAACGGT	1939	9	-	Catharanthus roseus	cis-acting element involved in cell cycle regulation
PdWRKY1	Myc	TCTCTTA	1720	7	-	Arabidopsis thaliana
PdWRKY1	TATA-box	TATA	44	4	+	Arabidopsis thaliana	core promoter element around -30 of transcription start
PdWRKY1	TATA-box	ATATAT	64	6	+	Brassica napus	core promoter element around -30 of transcription start
PdWRKY1	TATA-box	TATA	65	4	+	Arabidopsis thaliana	core promoter element around -30 of transcription start
PdWRKY1	TATA-box	taTATAAAtc	623	9	-	Arabidopsis thaliana	core promoter element around -30 of transcription start
PdWRKY1	TATA-box	TATAAA	625	6	-	Helianthus annuus	core promoter element around -30 of transcription start
PdWRKY1	TATA-box	TATATAA	626	7	-	Arabidopsis thaliana	core promoter element around -30 of transcription start
PdWRKY1	TATA-box	TATATA	627	6	+	Arabidopsis thaliana	core promoter element around -30 of transcription start
PdWRKY1	TATA-box	ATATAT	628	6	+	Brassica napus	core promoter element around -30 of transcription start
PdWRKY1	TATA-box	TATA	629	4	+	Arabidopsis thaliana	core promoter element around -30 of transcription start
PdWRKY1	TATA-box	TATAAAA	978	7	-	Pisum sativum	core promoter element around -30 of transcription start
PdWRKY1	TATA-box	TATAAA	979	6	-	Helianthus annuus	core promoter element around -30 of transcription start
PdWRKY1	TATA-box	TATAA	980	5	-	Arabidopsis thaliana	core promoter element around -30 of transcription start
PdWRKY1	TATA-box	TATA	981	4	+	Arabidopsis thaliana	core promoter element around -30 of transcription start
PdWRKY1	TATA-box	TATATAA	1050	7	-	Arabidopsis thaliana	core promoter element around -30 of transcription start
PdWRKY1	TATA-box	TATATA	1051	6	-	Arabidopsis thaliana	core promoter element around -30 of transcription start
PdWRKY1	TATA-box	TATA	1053	4	-	Arabidopsis thaliana	core promoter element around -30 of transcription start
PdWRKY1	TATA-box	TATAAAA	1113	7	-	Pisum sativum	core promoter element around -30 of transcription start
PdWRKY1	TATA-box	TATAAA	1114	6	-	Helianthus annuus	core promoter element around -30 of transcription start
PdWRKY1	TATA-box	TATAA	1115	5	-	Arabidopsis thaliana	core promoter element around -30 of transcription start
PdWRKY1	TATA-box	TATA	1116	4	-	Arabidopsis thaliana	core promoter element around -30 of transcription start
PdWRKY1	TATA-box	ATATAA	1125	6	+	Brassica oleracea	core promoter element around -30 of transcription start
PdWRKY1	TATA-box	TATA	1126	4	-	Arabidopsis thaliana	core promoter element around -30 of transcription start
PdWRKY1	TATA-box	TACAAAA	1157	7	+	Oryza sativa	core promoter element around -30 of transcription start
PdWRKY1	TATA-box	TATTTAAA	1297	8	+	Arabidopsis thaliana	core promoter element around -30 of transcription start
PdWRKY1	TATA-box	ccTATAAAaa	1373	9	+	Arabidopsis thaliana	core promoter element around -30 of transcription start
PdWRKY1	TATA-box	TACAAAA	1375	7	+	Oryza sativa	core promoter element around -30 of transcription start
PdWRKY1	TATA-box	TATA	1383	4	-	Arabidopsis thaliana	core promoter element around -30 of transcription start
PdWRKY1	TATA-box	TAAAGATT	1421	8	-	Arabidopsis thaliana	core promoter element around -30 of transcription start
PdWRKY1	TATA-box	TATAAGAA	1551	8	-	Zea mays	core promoter element around -30 of transcription start
PdWRKY1	TATA-box	TATAA	1554	5	-	Arabidopsis thaliana	core promoter element around -30 of transcription start
PdWRKY1	TATA-box	TATA	1555	4	-	Arabidopsis thaliana	core promoter element around -30 of transcription start
PdWRKY1	TATA-box	ATTATA	1589	6	+	Brassica napus	core promoter element around -30 of transcription start
PdWRKY1	TATA-box	TATAA	1590	5	-	Arabidopsis thaliana	core promoter element around -30 of transcription start
PdWRKY1	TATA-box	TATA	1591	4	-	Arabidopsis thaliana	core promoter element around -30 of transcription start
PdWRKY1	TATA-box	TATAAAA	1983	7	-	Pisum sativum	core promoter element around -30 of transcription start
PdWRKY1	TATA-box	TATAAA	1984	6	-	Helianthus annuus	core promoter element around -30 of transcription start
PdWRKY1	TATA-box	TATAA	1985	5	-	Arabidopsis thaliana	core promoter element around -30 of transcription start
PdWRKY1	TATA-box	TATA	1986	4	-	Arabidopsis thaliana	core promoter element around -30 of transcription start
PdWRKY1	MYB recognition site	CCGTTG	329	6	+	Arabidopsis thaliana
PdWRKY1	MYB recognition site	CCGTTG	913	6	-	Arabidopsis thaliana
PdWRKY1	MYB recognition site	CCGTTG	1940	6	+	Arabidopsis thaliana
PdWRKY1	Myb	CAACTG	1344	6	+	Arabidopsis thaliana
PdWRKY1	MYB	CAACCA	221	6	-	Arabidopsis thaliana
PdWRKY1	MYB	CAACCA	306	6	+	Arabidopsis thaliana
PdWRKY1	MYB	CAACCA	525	6	-	Arabidopsis thaliana
PdWRKY1	MYB	CAACAG	775	6	+	Arabidopsis thaliana
PdWRKY1	MYB	TAACCA	1222	6	-	Arabidopsis thaliana
PdWRKY1	MYB	CAACCA	1289	6	-	Arabidopsis thaliana
PdWRKY1	Myb-binding site	CAACAG	775	6	+	Nicotiana tabacum
PdWRKY1	GARE-motif	TCTGTTG	775	7	-	Brassica oleracea	gibberellin-responsive element
PdWRKY1	as-1	TGACG	1019	5	+	Arabidopsis thaliana
PdWRKY1	TCA-element	CCATCTTTTT	1159	9	-	Nicotiana tabacum	cis-acting element involved in salicylic acid responsiveness
PdWRKY1	ATCT-motif	AATCTAATCC	82	10	-	Pisum sativum	part of a conserved DNA module involved in light responsiveness
PdWRKY1	Unnamed__4	CTCC	258	4	+	Petroselinum hortense
PdWRKY1	Unnamed__4	CTCC	263	4	+	Petroselinum hortense
PdWRKY1	Unnamed__4	CTCC	451	4	-	Petroselinum hortense
PdWRKY1	Unnamed__4	CTCC	1170	4	-	Petroselinum hortense
PdWRKY1	Unnamed__4	CTCC	1622	4	-	Petroselinum hortense
PdWRKY1	Unnamed__4	CTCC	1844	4	+	Petroselinum hortense
PdWRKY1	Unnamed__4	CTCC	1863	4	+	Petroselinum hortense
PdWRKY1	Unnamed__4	CTCC	1935	4	+	Petroselinum hortense
PdWRKY1	O2-site	GATGACATGG	1877	9	-	Zea mays	cis-acting regulatory element involved in zein metabolism regulation
PdWRKY1	I-box	TGATAATGT	991	9	+	Solanum tuberosum	part of a light responsive element
PdWRKY1	Box 4	ATTAAT	123	6	+	Petroselinum crispum	part of a conserved DNA module involved in light responsiveness
PdWRKY1	Box 4	ATTAAT	288	6	+	Petroselinum crispum	part of a conserved DNA module involved in light responsiveness
PdWRKY1	Box 4	ATTAAT	1071	6	-	Petroselinum crispum	part of a conserved DNA module involved in light responsiveness
PdWRKY1	Box 4	ATTAAT	1579	6	-	Petroselinum crispum	part of a conserved DNA module involved in light responsiveness
PdWRKY1	TCA	TCATCTTCAT	1871	9	+	Pisum sativum
PdWRKY1	TGACG-motif	TGACG	1019	5	+	Hordeum vulgare	cis-acting regulatory element involved in the MeJA-responsiveness
PdWRKY1	W box	TTGACC	136	6	-	Arabidopsis thaliana
PdWRKY1	W box	TTGACC	665	6	-	Arabidopsis thaliana
PdWRKY1	W box	TTGACC	1754	6	+	Arabidopsis thaliana
PdWRKY1	WRE3	CCACCT	1370	6	+	Pisum sativum
PdWRKY1	GATA-motif	AAGGATAAGG	641	9	+	Solanum tuberosum	part of a light responsive element
PdWRKY1	CCGTCC motif	CCGTCC	353	6	-	Nicotiana tabacum
PdWRKY1	MYB-like sequence	TAACCA	1222	6	-	Arabidopsis thaliana
PdWRKY1	CTAG-motif	ACTAGCAGAA	1802	9	+	Avena sativa
PdWRKY1	ARE	AAACCA	827	6	+	Zea mays	cis-acting regulatory element essential for the anaerobic induction
PdWRKY1	ARE	AAACCA	1447	6	+	Zea mays	cis-acting regulatory element essential for the anaerobic induction
PdWRKY1	ARE	AAACCA	1493	6	+	Zea mays	cis-acting regulatory element essential for the anaerobic induction
PdWRKY1	ARE	AAACCA	1927	6	+	Zea mays	cis-acting regulatory element essential for the anaerobic induction
PdWRKY1	TATA	TATAAAAT	1112	8	-	Arabidopsis thaliana
PdWRKY1	box S	AGCCACC	566	7	+	Arabidopsis thaliana
PdWRKY1	CGTCA-motif	CGTCA	1019	5	-	Hordeum vulgare	cis-acting regulatory element involved in the MeJA-responsiveness
PdWRKY1		motif_sequence	256	4	+	organism	short_function
PdWRKY1		motif_sequence	577	4	-	organism	short_function
PdWRKY1		motif_sequence	736	4	-	organism	short_function
PdWRKY1		motif_sequence	808	4	+	organism	short_function
PdWRKY1		motif_sequence	1004	4	-	organism	short_function
PdWRKY1		motif_sequence	1133	4	+	organism	short_function
PdWRKY1		motif_sequence	1281	4	+	organism	short_function
PdWRKY1		motif_sequence	1306	4	+	organism	short_function
PdWRKY1		motif_sequence	1321	4	-	organism	short_function
PdWRKY1		motif_sequence	1705	4	+	organism	short_function
PdWRKY1		motif_sequence	1734	4	+	organism	short_function
PdWRKY1		motif_sequence	1873	4	+	organism	short_function
PdWRKY1		motif_sequence	1887	4	+	organism	short_function
PdWRKY1		motif_sequence	1933	4	+	organism	short_function
PdWRKY1	G-Box	CACGTT	509	6	+	Pisum sativum	cis-acting regulatory element involved in light responsiveness
PdWRKY1	ABRE	AACCCGG	427	7	+	Arabidopsis thaliana	cis-acting element involved in the abscisic acid responsiveness
PdWRKY1	ABRE	ACGTG	509	5	-	Arabidopsis thaliana	cis-acting element involved in the abscisic acid responsiveness
PdWRKY1	CCGTCC-box	CCGTCC	353	6	-	Petroselinum hortense
PdWRKY1	Unnamed__1	CGTGG	185	5	-	Zea mays
PdWRKY1	Unnamed__1	CGTGG	523	5	+	Zea mays
PdWRKY1	Unnamed__1	CGTGG	548	5	+	Zea mays
PdWRKY1	Unnamed__1	CGTGG	636	5	+	Zea mays
PdWRKY1	TCT-motif	TCTTAC	197	6	+	Arabidopsis thaliana	part of a light responsive element
PdWRKY1	TCT-motif	TCTTAC	588	6	+	Arabidopsis thaliana	part of a light responsive element
PdWRKY1	LTR	CCGAAA	245	6	+	Hordeum vulgare	cis-acting element involved in low-temperature responsiveness
PdWRKY1	MBS	CAACTG	1344	6	+	Arabidopsis thaliana	MYB binding site involved in drought-inducibility
PdWRKY1	chs-CMA2b	GAACCTACACAC	1094	11	+	Hordeum vulgare	part of a light responsive element
PdWRKY1	G-box	TAAACGTG	509	8	-	Brassica oleracea	cis-acting regulatory element involved in light responsiveness
PdWRKY1	G-box	CACGAC	521	6	-	Zea mays	cis-acting regulatory element involved in light responsiveness
PdWRKY1	ACE	CTAACGTATT	897	9	-	Petroselinum crispum	cis-acting element involved in light responsiveness
PdWRKY1	STRE	AGGGG	192	5	-	Arabidopsis thaliana
PdWRKY1	STRE	AGGGG	554	5	-	Arabidopsis thaliana
PdWRKY1	STRE	AGGGG	1813	5	-	Arabidopsis thaliana
PdWRKY1	CCAAT-box	CAACGG	329	6	-	Hordeum vulgare	MYBHv1 binding site
PdWRKY1	CCAAT-box	CAACGG	913	6	+	Hordeum vulgare	MYBHv1 binding site
PdWRKY1	CCAAT-box	CAACGG	1940	6	-	Hordeum vulgare	MYBHv1 binding site
PdWRKY1	CAAT-box	CAAT	37	4	+	Nicotiana glutinosa
PdWRKY1	CAAT-box	CAAT	139	4	+	Nicotiana glutinosa
PdWRKY1	CAAT-box	CAAT	147	4	-	Nicotiana glutinosa
PdWRKY1	CAAT-box	CAAT	153	4	-	Nicotiana glutinosa
PdWRKY1	CAAT-box	CAAAT	170	5	-	Pisum sativum	common cis-acting element in promoter and enhancer regions
PdWRKY1	CAAT-box	CAAAT	217	5	+	Pisum sativum	common cis-acting element in promoter and enhancer regions
PdWRKY1	CAAT-box	CAAAT	542	5	+	Pisum sativum	common cis-acting element in promoter and enhancer regions
PdWRKY1	CAAT-box	CAAAT	618	5	-	Pisum sativum	common cis-acting element in promoter and enhancer regions
PdWRKY1	CAAT-box	CAAT	632	4	-	Nicotiana glutinosa
PdWRKY1	CAAT-box	CCAAT	662	5	-	Arabidopsis thaliana	common cis-acting element in promoter and enhancer regions
PdWRKY1	CAAT-box	CAAAT	668	5	+	Pisum sativum	common cis-acting element in promoter and enhancer regions
PdWRKY1	CAAT-box	CAAAT	720	5	-	Pisum sativum	common cis-acting element in promoter and enhancer regions
PdWRKY1	CAAT-box	CAAAT	730	5	+	Pisum sativum	common cis-acting element in promoter and enhancer regions
PdWRKY1	CAAT-box	CAAT	733	4	-	Nicotiana glutinosa
PdWRKY1	CAAT-box	CAAT	792	4	+	Nicotiana glutinosa
PdWRKY1	CAAT-box	CAAT	813	4	+	Nicotiana glutinosa
PdWRKY1	CAAT-box	CAAT	853	4	-	Nicotiana glutinosa
PdWRKY1	CAAT-box	CAAAT	953	5	+	Pisum sativum	common cis-acting element in promoter and enhancer regions
PdWRKY1	CAAT-box	CAAAT	1024	5	+	Pisum sativum	common cis-acting element in promoter and enhancer regions
PdWRKY1	CAAT-box	CAAT	1066	4	+	Nicotiana glutinosa
PdWRKY1	CAAT-box	CAAAT	1122	5	+	Pisum sativum	common cis-acting element in promoter and enhancer regions
PdWRKY1	CAAT-box	CAAAT	1195	5	-	Pisum sativum	common cis-acting element in promoter and enhancer regions
PdWRKY1	CAAT-box	CAAT	1227	4	-	Nicotiana glutinosa
PdWRKY1	CAAT-box	CAAT	1248	4	-	Nicotiana glutinosa
PdWRKY1	CAAT-box	CCAAT	1255	5	-	Arabidopsis thaliana	common cis-acting element in promoter and enhancer regions
PdWRKY1	CAAT-box	CAAAT	1278	5	+	Pisum sativum	common cis-acting element in promoter and enhancer regions
PdWRKY1	CAAT-box	CAAAT	1315	5	-	Pisum sativum	common cis-acting element in promoter and enhancer regions
PdWRKY1	CAAT-box	CCAAT	1450	5	+	Arabidopsis thaliana	common cis-acting element in promoter and enhancer regions
PdWRKY1	CAAT-box	CAAT	1451	4	+	Nicotiana glutinosa
PdWRKY1	CAAT-box	CAAAT	1502	5	-	Pisum sativum	common cis-acting element in promoter and enhancer regions
PdWRKY1	CAAT-box	CAAAT	1606	5	-	Pisum sativum	common cis-acting element in promoter and enhancer regions
PdWRKY1	CAAT-box	CAAT	1703	4	+	Nicotiana glutinosa
PdWRKY1	CAAT-box	CAAT	1710	4	+	Nicotiana glutinosa
PdWRKY1	CAAT-box	CAAT	1743	4	+	Nicotiana glutinosa
PdWRKY1	CAAT-box	CAAT	1745	4	-	Nicotiana glutinosa
PdWRKY1	CAAT-box	CAAAT	1752	5	-	Pisum sativum	common cis-acting element in promoter and enhancer regions
PdWRKY1	CAAT-box	CAAAT	1760	5	-	Pisum sativum	common cis-acting element in promoter and enhancer regions
PdWRKY1	CAAT-box	CAAT	1777	4	-	Nicotiana glutinosa
PdWRKY1	CAAT-box	CCAAT	1930	5	+	Arabidopsis thaliana	common cis-acting element in promoter and enhancer regions
PdWRKY1	CAAT-box	CAAT	1931	4	+	Nicotiana glutinosa
PdWRKY1	A-box	CCGTCC	353	6	-	Petroselinum crispum	cis-acting regulatory element
PdWRKY1	AAGAA-motif	GAAAGAA	583	7	-	Avena sativa
PdWRKY10	Myb-binding site	CAACAG	1362	6	-	Nicotiana tabacum
PdWRKY10	Myb-binding site	CAACAG	1438	6	-	Nicotiana tabacum
PdWRKY10	Unnamed__1	CGTGG	5	5	-	Zea mays
PdWRKY10	ABRE4	CACGTA	1507	6	+	Zea mays
PdWRKY10	MYB recognition site	CCGTTG	1534	6	-	Arabidopsis thaliana
PdWRKY10	MYB recognition site	CCGTTG	1910	6	-	Arabidopsis thaliana
PdWRKY10	MYB	TAACCA	478	6	-	Arabidopsis thaliana
PdWRKY10	MYB	CAACAG	1362	6	-	Arabidopsis thaliana
PdWRKY10	MYB	CAACAG	1438	6	-	Arabidopsis thaliana
PdWRKY10	Myb	CAACTG	496	6	-	Arabidopsis thaliana
PdWRKY10	Myb	TAACTG	1301	6	-	Arabidopsis thaliana
PdWRKY10	Myb	TAACTG	1435	6	+	Arabidopsis thaliana
PdWRKY10		motif_sequence	66	4	+	organism	short_function
PdWRKY10		motif_sequence	102	4	+	organism	short_function
PdWRKY10		motif_sequence	154	4	+	organism	short_function
PdWRKY10		motif_sequence	526	4	-	organism	short_function
PdWRKY10		motif_sequence	719	4	-	organism	short_function
PdWRKY10		motif_sequence	875	4	-	organism	short_function
PdWRKY10		motif_sequence	1165	4	-	organism	short_function
PdWRKY10		motif_sequence	1276	4	+	organism	short_function
PdWRKY10		motif_sequence	1283	4	+	organism	short_function
PdWRKY10		motif_sequence	1479	4	+	organism	short_function
PdWRKY10		motif_sequence	1833	4	+	organism	short_function
PdWRKY10		motif_sequence	1893	4	+	organism	short_function
PdWRKY10	ABRE	ACGTG	1117	5	-	Arabidopsis thaliana	cis-acting element involved in the abscisic acid responsiveness
PdWRKY10	ABRE	ACGTG	1507	5	-	Arabidopsis thaliana	cis-acting element involved in the abscisic acid responsiveness
PdWRKY10	G-Box	CACGTT	1117	6	+	Pisum sativum	cis-acting regulatory element involved in light responsiveness
PdWRKY10	TATA-box	TATAAATA	12	8	-	Daucus carota	core promoter element around -30 of transcription start
PdWRKY10	TATA-box	TATAAAT	13	7	-	Brassica juncea	core promoter element around -30 of transcription start
PdWRKY10	TATA-box	TATAAA	14	6	-	Helianthus annuus	core promoter element around -30 of transcription start
PdWRKY10	TATA-box	TATAA	15	5	-	Arabidopsis thaliana	core promoter element around -30 of transcription start
PdWRKY10	TATA-box	TATATTTATATTT	16	12	+	Avena sativa	core promoter element around -30 of transcription start
PdWRKY10	TATA-box	taTATAAAtc	18	9	-	Arabidopsis thaliana	core promoter element around -30 of transcription start
PdWRKY10	TATA-box	TATAAAT	19	7	-	Brassica juncea	core promoter element around -30 of transcription start
PdWRKY10	TATA-box	TATAAA	20	6	-	Helianthus annuus	core promoter element around -30 of transcription start
PdWRKY10	TATA-box	TATATAA	21	7	-	Arabidopsis thaliana	core promoter element around -30 of transcription start
PdWRKY10	TATA-box	TATATA	22	6	+	Arabidopsis thaliana	core promoter element around -30 of transcription start
PdWRKY10	TATA-box	ATATAT	23	6	+	Brassica napus	core promoter element around -30 of transcription start
PdWRKY10	TATA-box	TATATA	24	6	+	Arabidopsis thaliana	core promoter element around -30 of transcription start
PdWRKY10	TATA-box	ATATAT	25	6	+	Brassica napus	core promoter element around -30 of transcription start
PdWRKY10	TATA-box	TATATA	26	6	+	Arabidopsis thaliana	core promoter element around -30 of transcription start
PdWRKY10	TATA-box	TATA	28	4	+	Arabidopsis thaliana	core promoter element around -30 of transcription start
PdWRKY10	TATA-box	TATA	72	4	+	Arabidopsis thaliana	core promoter element around -30 of transcription start
PdWRKY10	TATA-box	TATA	623	4	+	Arabidopsis thaliana	core promoter element around -30 of transcription start
PdWRKY10	TATA-box	ATTATA	631	6	+	Brassica napus	core promoter element around -30 of transcription start
PdWRKY10	TATA-box	TATAA	632	5	-	Arabidopsis thaliana	core promoter element around -30 of transcription start
PdWRKY10	TATA-box	TATA	633	4	+	Arabidopsis thaliana	core promoter element around -30 of transcription start
PdWRKY10	TATA-box	TACAAAA	715	7	-	Oryza sativa	core promoter element around -30 of transcription start
PdWRKY10	TATA-box	ATATAA	807	6	+	Brassica oleracea	core promoter element around -30 of transcription start
PdWRKY10	TATA-box	TATA	808	4	+	Arabidopsis thaliana	core promoter element around -30 of transcription start
PdWRKY10	TATA-box	ATTATA	840	6	+	Brassica napus	core promoter element around -30 of transcription start
PdWRKY10	TATA-box	TATAA	841	5	-	Arabidopsis thaliana	core promoter element around -30 of transcription start
PdWRKY10	TATA-box	TATA	842	4	+	Arabidopsis thaliana	core promoter element around -30 of transcription start
PdWRKY10	TATA-box	taTATAAAtc	860	9	-	Arabidopsis thaliana	core promoter element around -30 of transcription start
PdWRKY10	TATA-box	TATA	934	4	+	Arabidopsis thaliana	core promoter element around -30 of transcription start
PdWRKY10	TATA-box	ccTATAAAaa	1040	9	-	Arabidopsis thaliana	core promoter element around -30 of transcription start
PdWRKY10	TATA-box	TATAAAA	1041	7	-	Pisum sativum	core promoter element around -30 of transcription start
PdWRKY10	TATA-box	TATAAA	1042	6	-	Helianthus annuus	core promoter element around -30 of transcription start
PdWRKY10	TATA-box	TATAA	1043	5	-	Arabidopsis thaliana	core promoter element around -30 of transcription start
PdWRKY10	TATA-box	TATA	1044	4	-	Arabidopsis thaliana	core promoter element around -30 of transcription start
PdWRKY10	TATA-box	TATA	1107	4	-	Arabidopsis thaliana	core promoter element around -30 of transcription start
PdWRKY10	TATA-box	ccTATAAAaa	1130	10	+	Arabidopsis thaliana	core promoter element around -30 of transcription start
PdWRKY10	TATA-box	TATA	1132	4	-	Arabidopsis thaliana	core promoter element around -30 of transcription start
PdWRKY10	TATA-box	TATACA	1429	6	-	Helianthus annuus	core promoter element around -30 of transcription start
PdWRKY10	TATA-box	TATATA	1431	6	-	Arabidopsis thaliana	core promoter element around -30 of transcription start
PdWRKY10	TATA-box	ATATAA	1432	6	+	Brassica oleracea	core promoter element around -30 of transcription start
PdWRKY10	TATA-box	TATA	1433	4	-	Arabidopsis thaliana	core promoter element around -30 of transcription start
PdWRKY10	TATA-box	TATAA	1729	5	-	Arabidopsis thaliana	core promoter element around -30 of transcription start
PdWRKY10	TATA-box	TATA	1730	4	-	Arabidopsis thaliana	core promoter element around -30 of transcription start
PdWRKY10	TATA-box	TATAAAT	1952	7	-	Brassica juncea	core promoter element around -30 of transcription start
PdWRKY10	TATA-box	TATAAA	1953	6	-	Helianthus annuus	core promoter element around -30 of transcription start
PdWRKY10	TATA-box	TATAA	1954	5	-	Arabidopsis thaliana	core promoter element around -30 of transcription start
PdWRKY10	TATA-box	TATA	1955	4	-	Arabidopsis thaliana	core promoter element around -30 of transcription start
PdWRKY10	CARE	CAACTCAC	1484	8	+	Oryza sativa
PdWRKY10	CGTCA-motif	CGTCA	670	5	+	Hordeum vulgare	cis-acting regulatory element involved in the MeJA-responsiveness
PdWRKY10	CGTCA-motif	CGTCA	1639	5	-	Hordeum vulgare	cis-acting regulatory element involved in the MeJA-responsiveness
PdWRKY10	ARE	AAACCA	127	6	+	Zea mays	cis-acting regulatory element essential for the anaerobic induction
PdWRKY10	ARE	AAACCA	180	6	+	Zea mays	cis-acting regulatory element essential for the anaerobic induction
PdWRKY10	ARE	AAACCA	371	6	-	Zea mays	cis-acting regulatory element essential for the anaerobic induction
PdWRKY10	ARE	AAACCA	1498	6	+	Zea mays	cis-acting regulatory element essential for the anaerobic induction
PdWRKY10	ARE	AAACCA	1582	6	-	Zea mays	cis-acting regulatory element essential for the anaerobic induction
PdWRKY10	MYC	CATTTG	195	6	-	Arabidopsis thaliana
PdWRKY10	MYC	CATTTG	1228	6	+	Arabidopsis thaliana
PdWRKY10	MYC	CAATTG	1459	6	-	Arabidopsis thaliana
PdWRKY10	MYC	CATGTG	1615	6	+	Arabidopsis thaliana
PdWRKY10	MSA-like	(T/C)C(T/C)AACGG(T/C)(T/C)A	1908	9	+	Catharanthus roseus	cis-acting element involved in cell cycle regulation
PdWRKY10	MYB-like sequence	TAACCA	478	6	-	Arabidopsis thaliana
PdWRKY10	AT~TATA-box	TATATAAA	20	8	-	Arabidopsis thaliana
PdWRKY10	AT~TATA-box	TATATA	22	6	+	Arabidopsis thaliana
PdWRKY10	AT~TATA-box	TATATA	24	6	+	Arabidopsis thaliana
PdWRKY10	AT~TATA-box	TATATA	26	6	+	Arabidopsis thaliana
PdWRKY10	AT~TATA-box	TATATA	1431	6	-	Arabidopsis thaliana
PdWRKY10	WUN-motif	AAATTTCCT	1072	9	+	Brassica oleracea	wound-responsive element
PdWRKY10	TGA-element	AACGAC	1592	6	-	Brassica oleracea	auxin-responsive element
PdWRKY10	AAGAA-motif	gGTAAAGAAA	99	9	-	Avena sativa
PdWRKY10	AAGAA-motif	GAAAGAA	1182	7	+	Avena sativa
PdWRKY10	WRE3	CCACCT	1784	6	+	Pisum sativum
PdWRKY10	CAAT-box	CAAT	58	4	+	Nicotiana glutinosa
PdWRKY10	CAAT-box	CAAAT	195	5	+	Pisum sativum	common cis-acting element in promoter and enhancer regions
PdWRKY10	CAAT-box	CAAT	304	4	-	Nicotiana glutinosa
PdWRKY10	CAAT-box	CAAT	326	4	-	Nicotiana glutinosa
PdWRKY10	CAAT-box	CCAAT	369	5	-	Arabidopsis thaliana	common cis-acting element in promoter and enhancer regions
PdWRKY10	CAAT-box	CAAT	441	4	+	Nicotiana glutinosa
PdWRKY10	CAAT-box	CAAT	453	4	+	Nicotiana glutinosa
PdWRKY10	CAAT-box	CCAAT	476	5	-	Arabidopsis thaliana	common cis-acting element in promoter and enhancer regions
PdWRKY10	CAAT-box	CCAAT	485	5	+	Arabidopsis thaliana	common cis-acting element in promoter and enhancer regions
PdWRKY10	CAAT-box	CAAT	486	4	+	Nicotiana glutinosa
PdWRKY10	CAAT-box	CAAT	573	4	+	Nicotiana glutinosa
PdWRKY10	CAAT-box	CAAT	612	4	+	Nicotiana glutinosa
PdWRKY10	CAAT-box	CAAT	627	4	+	Nicotiana glutinosa
PdWRKY10	CAAT-box	CAAT	725	4	+	Nicotiana glutinosa
PdWRKY10	CAAT-box	CCAAT	740	5	-	Arabidopsis thaliana	common cis-acting element in promoter and enhancer regions
PdWRKY10	CAAT-box	CAAT	835	4	+	Nicotiana glutinosa
PdWRKY10	CAAT-box	CAAT	853	4	-	Nicotiana glutinosa
PdWRKY10	CAAT-box	CAAT	872	4	-	Nicotiana glutinosa
PdWRKY10	CAAT-box	CCAAT	973	5	-	Arabidopsis thaliana	common cis-acting element in promoter and enhancer regions
PdWRKY10	CAAT-box	CCAAT	1023	5	-	Arabidopsis thaliana	common cis-acting element in promoter and enhancer regions
PdWRKY10	CAAT-box	CAAAT	1071	5	+	Pisum sativum	common cis-acting element in promoter and enhancer regions
PdWRKY10	CAAT-box	CAAT	1084	4	+	Nicotiana glutinosa
PdWRKY10	CAAT-box	CAAT	1113	4	-	Nicotiana glutinosa
PdWRKY10	CAAT-box	CAAT	1169	4	-	Nicotiana glutinosa
PdWRKY10	CAAT-box	CCAAT	1178	5	-	Arabidopsis thaliana	common cis-acting element in promoter and enhancer regions
PdWRKY10	CAAT-box	CAAAT	1229	5	-	Pisum sativum	common cis-acting element in promoter and enhancer regions
PdWRKY10	CAAT-box	CAAAT	1236	5	-	Pisum sativum	common cis-acting element in promoter and enhancer regions
PdWRKY10	CAAT-box	CCAAT	1241	5	+	Arabidopsis thaliana	common cis-acting element in promoter and enhancer regions
PdWRKY10	CAAT-box	CAAT	1242	4	+	Nicotiana glutinosa
PdWRKY10	CAAT-box	CAAT	1332	4	+	Nicotiana glutinosa
PdWRKY10	CAAT-box	CAAT	1459	4	+	Nicotiana glutinosa
PdWRKY10	CAAT-box	CAAT	1461	4	-	Nicotiana glutinosa
PdWRKY10	CAAT-box	CAAAT	1543	5	+	Pisum sativum	common cis-acting element in promoter and enhancer regions
PdWRKY10	CAAT-box	CCAAT	1573	5	-	Arabidopsis thaliana	common cis-acting element in promoter and enhancer regions
PdWRKY10	CAAT-box	CAAT	1589	4	-	Nicotiana glutinosa
PdWRKY10	CAAT-box	CCAAT	1849	5	+	Arabidopsis thaliana	common cis-acting element in promoter and enhancer regions
PdWRKY10	CAAT-box	CAAT	1850	4	+	Nicotiana glutinosa
PdWRKY10	CAAT-box	CAAT	1977	4	+	Nicotiana glutinosa
PdWRKY10	STRE	AGGGG	1219	5	-	Arabidopsis thaliana
PdWRKY10	Box 4	ATTAAT	513	6	+	Petroselinum crispum	part of a conserved DNA module involved in light responsiveness
PdWRKY10	Box 4	ATTAAT	1852	6	-	Petroselinum crispum	part of a conserved DNA module involved in light responsiveness
PdWRKY10	P-box	CCTTTTG	1822	7	-	Oryza sativa	gibberellin-responsive element
PdWRKY10	P-box	CCTTTTG	1926	7	+	Oryza sativa	gibberellin-responsive element
PdWRKY10	TGACG-motif	TGACG	670	5	-	Hordeum vulgare	cis-acting regulatory element involved in the MeJA-responsiveness
PdWRKY10	TGACG-motif	TGACG	1639	5	+	Hordeum vulgare	cis-acting regulatory element involved in the MeJA-responsiveness
PdWRKY10	TCA	TCATCTTCAT	116	9	+	Pisum sativum
PdWRKY10	W box	TTGACC	192	6	-	Arabidopsis thaliana
PdWRKY10	W box	TTGACC	1150	6	+	Arabidopsis thaliana
PdWRKY10	W box	TTGACC	1827	6	-	Arabidopsis thaliana
PdWRKY10	W box	TTGACC	1930	6	+	Arabidopsis thaliana
PdWRKY10	CCAAT-box	CAACGG	1534	6	+	Hordeum vulgare	MYBHv1 binding site
PdWRKY10	CCAAT-box	CAACGG	1910	6	+	Hordeum vulgare	MYBHv1 binding site
PdWRKY10	ACE	GACACGTATG	1505	9	+	Petroselinum crispum	cis-acting element involved in light responsiveness
PdWRKY10	G-box	CACGAC	1407	6	-	Zea mays	cis-acting regulatory element involved in light responsiveness
PdWRKY10	G-box	CACGAC	1491	6	+	Zea mays	cis-acting regulatory element involved in light responsiveness
PdWRKY10	G-box	TAACACGTAG	1504	9	+	Brassica oleracea	cis-acting regulatory element involved in light responsiveness
PdWRKY10	G-box	TACGTG	1507	6	-	Arabidopsis thaliana	cis-acting regulatory element involved in light responsiveness
PdWRKY10	I-box	AGATAAGG	1934	8	-	Triticum aestivum	part of a light responsive element
PdWRKY10	ERE	ATTTCATA	554	8	-	Nicotiana glutinos
PdWRKY10	ERE	ATTTTAAA	1744	8	-	Nicotiana glutinos
PdWRKY10	Unnamed__4	CTCC	467	4	-	Petroselinum hortense
PdWRKY10	Unnamed__4	CTCC	523	4	-	Petroselinum hortense
PdWRKY10	Unnamed__4	CTCC	526	4	-	Petroselinum hortense
PdWRKY10	Unnamed__4	CTCC	606	4	+	Petroselinum hortense
PdWRKY10	Unnamed__4	CTCC	682	4	+	Petroselinum hortense
PdWRKY10	Unnamed__4	CTCC	1089	4	+	Petroselinum hortense
PdWRKY10	Unnamed__4	CTCC	1847	4	+	Petroselinum hortense
PdWRKY10	Unnamed__4	CTCC	1965	4	+	Petroselinum hortense
PdWRKY10	ABRE3a	TACGTG	1507	6	-	Zea mays
PdWRKY10	as-1	TGACG	670	5	-	Arabidopsis thaliana
PdWRKY10	as-1	TGACG	1639	5	+	Arabidopsis thaliana
PdWRKY10	MBS	CAACTG	496	6	-	Arabidopsis thaliana	MYB binding site involved in drought-inducibility
PdWRKY10	AAAC-motif	CAATCAAAACCT	612	11	+	Spinacia oleracea	light responsive element
PdWRKY11a	MYB-like sequence	TAACCA	1713	6	+	Arabidopsis thaliana
PdWRKY11a	AT~TATA-box	TATATA	707	6	+	Arabidopsis thaliana
PdWRKY11a	AT~TATA-box	TATATA	709	6	+	Arabidopsis thaliana
PdWRKY11a	AT~TATA-box	TATATA	831	6	+	Arabidopsis thaliana
PdWRKY11a	AT~TATA-box	TATATA	1206	6	-	Arabidopsis thaliana
PdWRKY11a	MYC	CATGTG	366	6	-	Arabidopsis thaliana
PdWRKY11a	MYC	CATGTG	368	6	+	Arabidopsis thaliana
PdWRKY11a	MYC	CAATTG	549	6	+	Arabidopsis thaliana
PdWRKY11a	MYC	CATTTG	956	6	+	Arabidopsis thaliana
PdWRKY11a	MYC	CATTTG	1091	6	+	Arabidopsis thaliana
PdWRKY11a	MYC	CATTTG	1479	6	+	Arabidopsis thaliana
PdWRKY11a	MYC	CATTTG	1842	6	+	Arabidopsis thaliana
PdWRKY11a	Myc	TCTCTTA	699	7	+	Arabidopsis thaliana
PdWRKY11a	ARE	AAACCA	484	6	+	Zea mays	cis-acting regulatory element essential for the anaerobic induction
PdWRKY11a	ARE	AAACCA	1545	6	-	Zea mays	cis-acting regulatory element essential for the anaerobic induction
PdWRKY11a	ARE	AAACCA	1770	6	+	Zea mays	cis-acting regulatory element essential for the anaerobic induction
PdWRKY11a		motif_sequence	34	4	+	organism	short_function
PdWRKY11a		motif_sequence	291	4	-	organism	short_function
PdWRKY11a		motif_sequence	382	4	+	organism	short_function
PdWRKY11a		motif_sequence	972	4	-	organism	short_function
PdWRKY11a		motif_sequence	1760	4	-	organism	short_function
PdWRKY11a		motif_sequence	1803	4	+	organism	short_function
PdWRKY11a		motif_sequence	1808	4	+	organism	short_function
PdWRKY11a		motif_sequence	1988	4	+	organism	short_function
PdWRKY11a	G-Box	CACGTT	231	6	+	Pisum sativum	cis-acting regulatory element involved in light responsiveness
PdWRKY11a	G-Box	CACGTT	399	6	+	Pisum sativum	cis-acting regulatory element involved in light responsiveness
PdWRKY11a	ABRE	GCAACGTGTC	229	9	-	Hordeum vulgare	cis-acting element involved in the abscisic acid responsiveness
PdWRKY11a	ABRE	ACGTG	231	5	-	Arabidopsis thaliana	cis-acting element involved in the abscisic acid responsiveness
PdWRKY11a	ABRE	ACGTG	360	5	+	Arabidopsis thaliana	cis-acting element involved in the abscisic acid responsiveness
PdWRKY11a	ABRE	ACGTG	399	5	-	Arabidopsis thaliana	cis-acting element involved in the abscisic acid responsiveness
PdWRKY11a	TATA-box	ATTATA	6	6	+	Brassica napus	core promoter element around -30 of transcription start
PdWRKY11a	TATA-box	TATAA	7	5	-	Arabidopsis thaliana	core promoter element around -30 of transcription start
PdWRKY11a	TATA-box	TATA	8	4	+	Arabidopsis thaliana	core promoter element around -30 of transcription start
PdWRKY11a	TATA-box	ATTATA	22	6	+	Brassica napus	core promoter element around -30 of transcription start
PdWRKY11a	TATA-box	TATAA	23	5	-	Arabidopsis thaliana	core promoter element around -30 of transcription start
PdWRKY11a	TATA-box	TATA	24	4	+	Arabidopsis thaliana	core promoter element around -30 of transcription start
PdWRKY11a	TATA-box	TACAAAA	64	7	-	Oryza sativa	core promoter element around -30 of transcription start
PdWRKY11a	TATA-box	TATAAAT	105	7	-	Brassica juncea	core promoter element around -30 of transcription start
PdWRKY11a	TATA-box	TATAAA	106	6	-	Helianthus annuus	core promoter element around -30 of transcription start
PdWRKY11a	TATA-box	TATAA	107	5	-	Arabidopsis thaliana	core promoter element around -30 of transcription start
PdWRKY11a	TATA-box	TATA	108	4	+	Arabidopsis thaliana	core promoter element around -30 of transcription start
PdWRKY11a	TATA-box	TATA	649	4	+	Arabidopsis thaliana	core promoter element around -30 of transcription start
PdWRKY11a	TATA-box	ATATAT	706	6	+	Brassica napus	core promoter element around -30 of transcription start
PdWRKY11a	TATA-box	TATATA	707	6	+	Arabidopsis thaliana	core promoter element around -30 of transcription start
PdWRKY11a	TATA-box	ATATAT	708	6	+	Brassica napus	core promoter element around -30 of transcription start
PdWRKY11a	TATA-box	TATATA	709	6	+	Arabidopsis thaliana	core promoter element around -30 of transcription start
PdWRKY11a	TATA-box	ATATAT	710	6	+	Brassica napus	core promoter element around -30 of transcription start
PdWRKY11a	TATA-box	TATA	711	4	+	Arabidopsis thaliana	core promoter element around -30 of transcription start
PdWRKY11a	TATA-box	TACATAAA	738	8	-	Oryza sativa	core promoter element around -30 of transcription start
PdWRKY11a	TATA-box	ATATAT	830	6	+	Brassica napus	core promoter element around -30 of transcription start
PdWRKY11a	TATA-box	TATATA	831	6	+	Arabidopsis thaliana	core promoter element around -30 of transcription start
PdWRKY11a	TATA-box	ATATAA	832	6	+	Brassica oleracea	core promoter element around -30 of transcription start
PdWRKY11a	TATA-box	TATA	833	4	+	Arabidopsis thaliana	core promoter element around -30 of transcription start
PdWRKY11a	TATA-box	TATA	848	4	+	Arabidopsis thaliana	core promoter element around -30 of transcription start
PdWRKY11a	TATA-box	TATTTAAA	1002	8	-	Arabidopsis thaliana	core promoter element around -30 of transcription start
PdWRKY11a	TATA-box	TATAAAA	1039	7	-	Pisum sativum	core promoter element around -30 of transcription start
PdWRKY11a	TATA-box	TATAAA	1040	6	-	Helianthus annuus	core promoter element around -30 of transcription start
PdWRKY11a	TATA-box	TATAA	1041	5	-	Arabidopsis thaliana	core promoter element around -30 of transcription start
PdWRKY11a	TATA-box	TATA	1042	4	-	Arabidopsis thaliana	core promoter element around -30 of transcription start
PdWRKY11a	TATA-box	ATATAT	1205	6	-	Brassica napus	core promoter element around -30 of transcription start
PdWRKY11a	TATA-box	TATATA	1206	6	-	Arabidopsis thaliana	core promoter element around -30 of transcription start
PdWRKY11a	TATA-box	TATA	1208	4	-	Arabidopsis thaliana	core promoter element around -30 of transcription start
PdWRKY11a	TATA-box	TATAAAA	1315	7	-	Pisum sativum	core promoter element around -30 of transcription start
PdWRKY11a	TATA-box	TATAAA	1316	6	-	Helianthus annuus	core promoter element around -30 of transcription start
PdWRKY11a	TATA-box	TATAA	1317	5	-	Arabidopsis thaliana	core promoter element around -30 of transcription start
PdWRKY11a	TATA-box	TATA	1318	4	-	Arabidopsis thaliana	core promoter element around -30 of transcription start
PdWRKY11a	TATA-box	TATA	1440	4	-	Arabidopsis thaliana	core promoter element around -30 of transcription start
PdWRKY11a	TATA-box	TATTTAAA	1462	8	+	Arabidopsis thaliana	core promoter element around -30 of transcription start
PdWRKY11a	TATA-box	TATAAAT	1567	7	-	Brassica juncea	core promoter element around -30 of transcription start
PdWRKY11a	TATA-box	TATAAA	1568	6	-	Helianthus annuus	core promoter element around -30 of transcription start
PdWRKY11a	TATA-box	TATAA	1569	5	-	Arabidopsis thaliana	core promoter element around -30 of transcription start
PdWRKY11a	TATA-box	TATA	1570	4	-	Arabidopsis thaliana	core promoter element around -30 of transcription start
PdWRKY11a	TATA-box	TATAAAA	1708	7	-	Pisum sativum	core promoter element around -30 of transcription start
PdWRKY11a	TATA-box	TATAAA	1709	6	-	Helianthus annuus	core promoter element around -30 of transcription start
PdWRKY11a	TATA-box	TATAA	1710	5	-	Arabidopsis thaliana	core promoter element around -30 of transcription start
PdWRKY11a	TATA-box	TATA	1711	4	-	Arabidopsis thaliana	core promoter element around -30 of transcription start
PdWRKY11a	TATA-box	ATATAA	1872	6	+	Brassica oleracea	core promoter element around -30 of transcription start
PdWRKY11a	TATA-box	TATA	1873	4	-	Arabidopsis thaliana	core promoter element around -30 of transcription start
PdWRKY11a	TATA-box	TATAAA	1887	6	-	Helianthus annuus	core promoter element around -30 of transcription start
PdWRKY11a	TATA-box	TATAA	1888	5	-	Arabidopsis thaliana	core promoter element around -30 of transcription start
PdWRKY11a	TATA-box	TATA	1889	4	-	Arabidopsis thaliana	core promoter element around -30 of transcription start
PdWRKY11a	TATA-box	TATA	1943	4	-	Arabidopsis thaliana	core promoter element around -30 of transcription start
PdWRKY11a	TATA-box	TATAAATA	1956	8	-	Daucus carota	core promoter element around -30 of transcription start
PdWRKY11a	TATA-box	TATAAAT	1957	7	-	Brassica juncea	core promoter element around -30 of transcription start
PdWRKY11a	TATA-box	TATAAA	1958	6	-	Helianthus annuus	core promoter element around -30 of transcription start
PdWRKY11a	TATA-box	TATAA	1959	5	-	Arabidopsis thaliana	core promoter element around -30 of transcription start
PdWRKY11a	TATA-box	TATA	1960	4	-	Arabidopsis thaliana	core promoter element around -30 of transcription start
PdWRKY11a	CCGTCC-box	CCGTCC	1689	6	+	Petroselinum hortense
PdWRKY11a	Unnamed__1	CGTGG	631	5	-	Zea mays
PdWRKY11a	MYB	TAACCA	1713	6	+	Arabidopsis thaliana
PdWRKY11a	MYB	CAACCA	1750	6	+	Arabidopsis thaliana
PdWRKY11a	MYB	CAACCA	1917	6	+	Arabidopsis thaliana
PdWRKY11a	Myb	CAACTG	474	6	-	Arabidopsis thaliana
PdWRKY11a	Myb	TAACTG	519	6	+	Arabidopsis thaliana
PdWRKY11a	AE-box	AGAAACAA	71	8	-	Arabidopsis thaliana	part of a module for light response
PdWRKY11a	AE-box	AGAAACTT	308	8	-	Arabidopsis thaliana	part of a module for light response
PdWRKY11a	RY-element	CATGCATG	587	8	+	Helianthus annuus	cis-acting regulatory element involved in seed-specific regulation
PdWRKY11a	LTR	CCGAAA	597	6	-	Hordeum vulgare	cis-acting element involved in low-temperature responsiveness
PdWRKY11a	MBS	CAACTG	474	6	-	Arabidopsis thaliana	MYB binding site involved in drought-inducibility
PdWRKY11a	ERE	ATTTTAAA	1407	8	+	Nicotiana glutinos
PdWRKY11a	ERE	ATTTTAAA	1450	8	-	Nicotiana glutinos
PdWRKY11a	Unnamed__4	CTCC	36	4	+	Petroselinum hortense
PdWRKY11a	Unnamed__4	CTCC	256	4	-	Petroselinum hortense
PdWRKY11a	Unnamed__4	CTCC	787	4	-	Petroselinum hortense
PdWRKY11a	Unnamed__4	CTCC	870	4	+	Petroselinum hortense
PdWRKY11a	Unnamed__4	CTCC	898	4	-	Petroselinum hortense
PdWRKY11a	Unnamed__4	CTCC	1339	4	+	Petroselinum hortense
PdWRKY11a	Unnamed__4	CTCC	1394	4	-	Petroselinum hortense
PdWRKY11a	Unnamed__4	CTCC	1782	4	+	Petroselinum hortense
PdWRKY11a	Unnamed__4	CTCC	1814	4	+	Petroselinum hortense
PdWRKY11a	Unnamed__4	CTCC	1817	4	+	Petroselinum hortense
PdWRKY11a	Unnamed__4	CTCC	1855	4	+	Petroselinum hortense
PdWRKY11a	Unnamed__4	CTCC	1914	4	+	Petroselinum hortense
PdWRKY11a	Unnamed__4	CTCC	1976	4	+	Petroselinum hortense
PdWRKY11a	O2-site	GATGATGTGG	81	9	-	Zea mays	cis-acting regulatory element involved in zein metabolism regulation
PdWRKY11a	G-box	CACGTC	359	6	-	Zea mays	cis-acting regulatory element involved in light responsiveness
PdWRKY11a	G-box	TAAACGTG	399	8	-	Brassica oleracea	cis-acting regulatory element involved in light responsiveness
PdWRKY11a	MRE	AACCTAA	404	7	-	Petroselinum crispum	MYB binding site involved in light responsiveness
PdWRKY11a	Box 4	ATTAAT	444	6	+	Petroselinum crispum	part of a conserved DNA module involved in light responsiveness
PdWRKY11a	STRE	AGGGG	1779	5	-	Arabidopsis thaliana
PdWRKY11a	P-box	CCTTTTG	781	7	+	Oryza sativa	gibberellin-responsive element
PdWRKY11a	TC-rich repeats	GTTTTCTTAC	1239	9	+	Nicotiana tabacum	cis-acting element involved in defense and stress responsiveness
PdWRKY11a	W box	TTGACC	161	6	-	Arabidopsis thaliana
PdWRKY11a	W box	TTGACC	284	6	+	Arabidopsis thaliana
PdWRKY11a	W box	TTGACC	681	6	+	Arabidopsis thaliana
PdWRKY11a	chs-CMA1a	TTACTTAA	1055	8	+	Daucus carota	part of a light responsive element
PdWRKY11a	A-box	CCGTCC	1689	6	+	Petroselinum crispum	cis-acting regulatory element
PdWRKY11a	CAAT-box	CAAT	1	4	+	Nicotiana glutinosa
PdWRKY11a	CAAT-box	CCAAT	59	5	+	Arabidopsis thaliana	common cis-acting element in promoter and enhancer regions
PdWRKY11a	CAAT-box	CAAT	60	4	+	Nicotiana glutinosa
PdWRKY11a	CAAT-box	CAAT	70	4	-	Nicotiana glutinosa
PdWRKY11a	CAAT-box	CAAT	90	4	+	Nicotiana glutinosa
PdWRKY11a	CAAT-box	CAAT	95	4	+	Nicotiana glutinosa
PdWRKY11a	CAAT-box	CAAT	103	4	+	Nicotiana glutinosa
PdWRKY11a	CAAT-box	CAAAT	113	5	+	Pisum sativum	common cis-acting element in promoter and enhancer regions
PdWRKY11a	CAAT-box	CAAAT	164	5	+	Pisum sativum	common cis-acting element in promoter and enhancer regions
PdWRKY11a	CAAT-box	CAAT	169	4	+	Nicotiana glutinosa
PdWRKY11a	CAAT-box	CAAT	192	4	-	Nicotiana glutinosa
PdWRKY11a	CAAT-box	CAAAT	436	5	-	Pisum sativum	common cis-acting element in promoter and enhancer regions
PdWRKY11a	CAAT-box	CAAT	491	4	+	Nicotiana glutinosa
PdWRKY11a	CAAT-box	CAAT	508	4	+	Nicotiana glutinosa
PdWRKY11a	CAAT-box	CCAAT	548	5	+	Arabidopsis thaliana	common cis-acting element in promoter and enhancer regions
PdWRKY11a	CAAT-box	CAAT	549	4	+	Nicotiana glutinosa
PdWRKY11a	CAAT-box	CAAT	551	4	-	Nicotiana glutinosa
PdWRKY11a	CAAT-box	CAAAT	637	5	+	Pisum sativum	common cis-acting element in promoter and enhancer regions
PdWRKY11a	CAAT-box	CAAAT	820	5	-	Pisum sativum	common cis-acting element in promoter and enhancer regions
PdWRKY11a	CAAT-box	CAAT	934	4	-	Nicotiana glutinosa
PdWRKY11a	CAAT-box	CAAAT	947	5	+	Pisum sativum	common cis-acting element in promoter and enhancer regions
PdWRKY11a	CAAT-box	CAAAT	957	5	-	Pisum sativum	common cis-acting element in promoter and enhancer regions
PdWRKY11a	CAAT-box	CAAT	1068	4	+	Nicotiana glutinosa
PdWRKY11a	CAAT-box	CAAAT	1092	5	-	Pisum sativum	common cis-acting element in promoter and enhancer regions
PdWRKY11a	CAAT-box	CAAAT	1101	5	+	Pisum sativum	common cis-acting element in promoter and enhancer regions
PdWRKY11a	CAAT-box	CAAAT	1122	5	+	Pisum sativum	common cis-acting element in promoter and enhancer regions
PdWRKY11a	CAAT-box	CAAAT	1133	5	+	Pisum sativum	common cis-acting element in promoter and enhancer regions
PdWRKY11a	CAAT-box	CAAAT	1165	5	+	Pisum sativum	common cis-acting element in promoter and enhancer regions
PdWRKY11a	CAAT-box	CAAT	1189	4	-	Nicotiana glutinosa
PdWRKY11a	CAAT-box	CAAAT	1247	5	-	Pisum sativum	common cis-acting element in promoter and enhancer regions
PdWRKY11a	CAAT-box	CAAT	1328	4	+	Nicotiana glutinosa
PdWRKY11a	CAAT-box	CCAAT	1364	5	+	Arabidopsis thaliana	common cis-acting element in promoter and enhancer regions
PdWRKY11a	CAAT-box	CAAT	1365	4	+	Nicotiana glutinosa
PdWRKY11a	CAAT-box	CAAAT	1417	5	-	Pisum sativum	common cis-acting element in promoter and enhancer regions
PdWRKY11a	CAAT-box	CAAT	1434	4	-	Nicotiana glutinosa
PdWRKY11a	CAAT-box	CAAAT	1480	5	-	Pisum sativum	common cis-acting element in promoter and enhancer regions
PdWRKY11a	CAAT-box	CAAAT	1559	5	-	Pisum sativum	common cis-acting element in promoter and enhancer regions
PdWRKY11a	CAAT-box	CAAT	1574	4	+	Nicotiana glutinosa
PdWRKY11a	CAAT-box	CAAAT	1632	5	+	Pisum sativum	common cis-acting element in promoter and enhancer regions
PdWRKY11a	CAAT-box	CAAT	1644	4	-	Nicotiana glutinosa
PdWRKY11a	CAAT-box	CAAT	1655	4	+	Nicotiana glutinosa
PdWRKY11a	CAAT-box	CAAAT	1670	5	-	Pisum sativum	common cis-acting element in promoter and enhancer regions
PdWRKY11a	CAAT-box	CAAAT	1843	5	-	Pisum sativum	common cis-acting element in promoter and enhancer regions
PdWRKY11a	CAAT-box	CCAAT	1979	5	+	Arabidopsis thaliana	common cis-acting element in promoter and enhancer regions
PdWRKY11a	CAAT-box	CAAT	1980	4	+	Nicotiana glutinosa
PdWRKY11a	WUN-motif	CCATTTCAA	211	9	+	Nicotiana glutinosa
PdWRKY11a	AAGAA-motif	GAAAGAA	75	7	-	Avena sativa
PdWRKY11a	AAGAA-motif	GAAAGAA	915	7	-	Avena sativa
PdWRKY11a	CCGTCC motif	CCGTCC	1689	6	+	Nicotiana tabacum
PdWRKY11a	AT-rich sequence	TAAAATACT	1404	9	-	Pisum sativum	element for maximal elicitor-mediated activation (2copies)
PdWRKY11b	AE-box	AGAAACAA	71	8	-	Arabidopsis thaliana	part of a module for light response
PdWRKY11b	AE-box	AGAAACTT	308	8	-	Arabidopsis thaliana	part of a module for light response
PdWRKY11b	MYB	TAACCA	1713	6	+	Arabidopsis thaliana
PdWRKY11b	MYB	CAACCA	1750	6	+	Arabidopsis thaliana
PdWRKY11b	MYB	CAACCA	1917	6	+	Arabidopsis thaliana
PdWRKY11b	Myb	CAACTG	474	6	-	Arabidopsis thaliana
PdWRKY11b	Myb	TAACTG	519	6	+	Arabidopsis thaliana
PdWRKY11b	Unnamed__1	CGTGG	631	5	-	Zea mays
PdWRKY11b	TATA-box	ATTATA	6	6	+	Brassica napus	core promoter element around -30 of transcription start
PdWRKY11b	TATA-box	TATAA	7	5	-	Arabidopsis thaliana	core promoter element around -30 of transcription start
PdWRKY11b	TATA-box	TATA	8	4	+	Arabidopsis thaliana	core promoter element around -30 of transcription start
PdWRKY11b	TATA-box	ATTATA	22	6	+	Brassica napus	core promoter element around -30 of transcription start
PdWRKY11b	TATA-box	TATAA	23	5	-	Arabidopsis thaliana	core promoter element around -30 of transcription start
PdWRKY11b	TATA-box	TATA	24	4	+	Arabidopsis thaliana	core promoter element around -30 of transcription start
PdWRKY11b	TATA-box	TACAAAA	64	7	-	Oryza sativa	core promoter element around -30 of transcription start
PdWRKY11b	TATA-box	TATAAAT	105	7	-	Brassica juncea	core promoter element around -30 of transcription start
PdWRKY11b	TATA-box	TATAAA	106	6	-	Helianthus annuus	core promoter element around -30 of transcription start
PdWRKY11b	TATA-box	TATAA	107	5	-	Arabidopsis thaliana	core promoter element around -30 of transcription start
PdWRKY11b	TATA-box	TATA	108	4	+	Arabidopsis thaliana	core promoter element around -30 of transcription start
PdWRKY11b	TATA-box	TATA	649	4	+	Arabidopsis thaliana	core promoter element around -30 of transcription start
PdWRKY11b	TATA-box	ATATAT	706	6	+	Brassica napus	core promoter element around -30 of transcription start
PdWRKY11b	TATA-box	TATATA	707	6	+	Arabidopsis thaliana	core promoter element around -30 of transcription start
PdWRKY11b	TATA-box	ATATAT	708	6	+	Brassica napus	core promoter element around -30 of transcription start
PdWRKY11b	TATA-box	TATATA	709	6	+	Arabidopsis thaliana	core promoter element around -30 of transcription start
PdWRKY11b	TATA-box	ATATAT	710	6	+	Brassica napus	core promoter element around -30 of transcription start
PdWRKY11b	TATA-box	TATA	711	4	+	Arabidopsis thaliana	core promoter element around -30 of transcription start
PdWRKY11b	TATA-box	TACATAAA	738	8	-	Oryza sativa	core promoter element around -30 of transcription start
PdWRKY11b	TATA-box	ATATAT	830	6	+	Brassica napus	core promoter element around -30 of transcription start
PdWRKY11b	TATA-box	TATATA	831	6	+	Arabidopsis thaliana	core promoter element around -30 of transcription start
PdWRKY11b	TATA-box	ATATAA	832	6	+	Brassica oleracea	core promoter element around -30 of transcription start
PdWRKY11b	TATA-box	TATA	833	4	+	Arabidopsis thaliana	core promoter element around -30 of transcription start
PdWRKY11b	TATA-box	TATA	848	4	+	Arabidopsis thaliana	core promoter element around -30 of transcription start
PdWRKY11b	TATA-box	TATTTAAA	1002	8	-	Arabidopsis thaliana	core promoter element around -30 of transcription start
PdWRKY11b	TATA-box	TATAAAA	1039	7	-	Pisum sativum	core promoter element around -30 of transcription start
PdWRKY11b	TATA-box	TATAAA	1040	6	-	Helianthus annuus	core promoter element around -30 of transcription start
PdWRKY11b	TATA-box	TATAA	1041	5	-	Arabidopsis thaliana	core promoter element around -30 of transcription start
PdWRKY11b	TATA-box	TATA	1042	4	-	Arabidopsis thaliana	core promoter element around -30 of transcription start
PdWRKY11b	TATA-box	ATATAT	1205	6	-	Brassica napus	core promoter element around -30 of transcription start
PdWRKY11b	TATA-box	TATATA	1206	6	-	Arabidopsis thaliana	core promoter element around -30 of transcription start
PdWRKY11b	TATA-box	TATA	1208	4	-	Arabidopsis thaliana	core promoter element around -30 of transcription start
PdWRKY11b	TATA-box	TATAAAA	1315	7	-	Pisum sativum	core promoter element around -30 of transcription start
PdWRKY11b	TATA-box	TATAAA	1316	6	-	Helianthus annuus	core promoter element around -30 of transcription start
PdWRKY11b	TATA-box	TATAA	1317	5	-	Arabidopsis thaliana	core promoter element around -30 of transcription start
PdWRKY11b	TATA-box	TATA	1318	4	-	Arabidopsis thaliana	core promoter element around -30 of transcription start
PdWRKY11b	TATA-box	TATA	1440	4	-	Arabidopsis thaliana	core promoter element around -30 of transcription start
PdWRKY11b	TATA-box	TATTTAAA	1462	8	+	Arabidopsis thaliana	core promoter element around -30 of transcription start
PdWRKY11b	TATA-box	TATAAAT	1567	7	-	Brassica juncea	core promoter element around -30 of transcription start
PdWRKY11b	TATA-box	TATAAA	1568	6	-	Helianthus annuus	core promoter element around -30 of transcription start
PdWRKY11b	TATA-box	TATAA	1569	5	-	Arabidopsis thaliana	core promoter element around -30 of transcription start
PdWRKY11b	TATA-box	TATA	1570	4	-	Arabidopsis thaliana	core promoter element around -30 of transcription start
PdWRKY11b	TATA-box	TATAAAA	1708	7	-	Pisum sativum	core promoter element around -30 of transcription start
PdWRKY11b	TATA-box	TATAAA	1709	6	-	Helianthus annuus	core promoter element around -30 of transcription start
PdWRKY11b	TATA-box	TATAA	1710	5	-	Arabidopsis thaliana	core promoter element around -30 of transcription start
PdWRKY11b	TATA-box	TATA	1711	4	-	Arabidopsis thaliana	core promoter element around -30 of transcription start
PdWRKY11b	TATA-box	ATATAA	1872	6	+	Brassica oleracea	core promoter element around -30 of transcription start
PdWRKY11b	TATA-box	TATA	1873	4	-	Arabidopsis thaliana	core promoter element around -30 of transcription start
PdWRKY11b	TATA-box	TATAAA	1887	6	-	Helianthus annuus	core promoter element around -30 of transcription start
PdWRKY11b	TATA-box	TATAA	1888	5	-	Arabidopsis thaliana	core promoter element around -30 of transcription start
PdWRKY11b	TATA-box	TATA	1889	4	-	Arabidopsis thaliana	core promoter element around -30 of transcription start
PdWRKY11b	TATA-box	TATA	1943	4	-	Arabidopsis thaliana	core promoter element around -30 of transcription start
PdWRKY11b	TATA-box	TATAAATA	1956	8	-	Daucus carota	core promoter element around -30 of transcription start
PdWRKY11b	TATA-box	TATAAAT	1957	7	-	Brassica juncea	core promoter element around -30 of transcription start
PdWRKY11b	TATA-box	TATAAA	1958	6	-	Helianthus annuus	core promoter element around -30 of transcription start
PdWRKY11b	TATA-box	TATAA	1959	5	-	Arabidopsis thaliana	core promoter element around -30 of transcription start
PdWRKY11b	TATA-box	TATA	1960	4	-	Arabidopsis thaliana	core promoter element around -30 of transcription start
PdWRKY11b	CCGTCC-box	CCGTCC	1689	6	+	Petroselinum hortense
PdWRKY11b		motif_sequence	34	4	+	organism	short_function
PdWRKY11b		motif_sequence	291	4	-	organism	short_function
PdWRKY11b		motif_sequence	382	4	+	organism	short_function
PdWRKY11b		motif_sequence	972	4	-	organism	short_function
PdWRKY11b		motif_sequence	1760	4	-	organism	short_function
PdWRKY11b		motif_sequence	1803	4	+	organism	short_function
PdWRKY11b		motif_sequence	1808	4	+	organism	short_function
PdWRKY11b		motif_sequence	1988	4	+	organism	short_function
PdWRKY11b	ABRE	GCAACGTGTC	229	9	-	Hordeum vulgare	cis-acting element involved in the abscisic acid responsiveness
PdWRKY11b	ABRE	ACGTG	231	5	-	Arabidopsis thaliana	cis-acting element involved in the abscisic acid responsiveness
PdWRKY11b	ABRE	ACGTG	360	5	+	Arabidopsis thaliana	cis-acting element involved in the abscisic acid responsiveness
PdWRKY11b	ABRE	ACGTG	399	5	-	Arabidopsis thaliana	cis-acting element involved in the abscisic acid responsiveness
PdWRKY11b	G-Box	CACGTT	231	6	+	Pisum sativum	cis-acting regulatory element involved in light responsiveness
PdWRKY11b	G-Box	CACGTT	399	6	+	Pisum sativum	cis-acting regulatory element involved in light responsiveness
PdWRKY11b	RY-element	CATGCATG	587	8	+	Helianthus annuus	cis-acting regulatory element involved in seed-specific regulation
PdWRKY11b	MYC	CATGTG	366	6	-	Arabidopsis thaliana
PdWRKY11b	MYC	CATGTG	368	6	+	Arabidopsis thaliana
PdWRKY11b	MYC	CAATTG	549	6	+	Arabidopsis thaliana
PdWRKY11b	MYC	CATTTG	956	6	+	Arabidopsis thaliana
PdWRKY11b	MYC	CATTTG	1091	6	+	Arabidopsis thaliana
PdWRKY11b	MYC	CATTTG	1479	6	+	Arabidopsis thaliana
PdWRKY11b	MYC	CATTTG	1842	6	+	Arabidopsis thaliana
PdWRKY11b	AT~TATA-box	TATATA	707	6	+	Arabidopsis thaliana
PdWRKY11b	AT~TATA-box	TATATA	709	6	+	Arabidopsis thaliana
PdWRKY11b	AT~TATA-box	TATATA	831	6	+	Arabidopsis thaliana
PdWRKY11b	AT~TATA-box	TATATA	1206	6	-	Arabidopsis thaliana
PdWRKY11b	MYB-like sequence	TAACCA	1713	6	+	Arabidopsis thaliana
PdWRKY11b	ARE	AAACCA	484	6	+	Zea mays	cis-acting regulatory element essential for the anaerobic induction
PdWRKY11b	ARE	AAACCA	1545	6	-	Zea mays	cis-acting regulatory element essential for the anaerobic induction
PdWRKY11b	ARE	AAACCA	1770	6	+	Zea mays	cis-acting regulatory element essential for the anaerobic induction
PdWRKY11b	Myc	TCTCTTA	699	7	+	Arabidopsis thaliana
PdWRKY11b	TC-rich repeats	GTTTTCTTAC	1239	9	+	Nicotiana tabacum	cis-acting element involved in defense and stress responsiveness
PdWRKY11b	W box	TTGACC	161	6	-	Arabidopsis thaliana
PdWRKY11b	W box	TTGACC	284	6	+	Arabidopsis thaliana
PdWRKY11b	W box	TTGACC	681	6	+	Arabidopsis thaliana
PdWRKY11b	P-box	CCTTTTG	781	7	+	Oryza sativa	gibberellin-responsive element
PdWRKY11b	Box 4	ATTAAT	444	6	+	Petroselinum crispum	part of a conserved DNA module involved in light responsiveness
PdWRKY11b	STRE	AGGGG	1779	5	-	Arabidopsis thaliana
PdWRKY11b	MRE	AACCTAA	404	7	-	Petroselinum crispum	MYB binding site involved in light responsiveness
PdWRKY11b	CCGTCC motif	CCGTCC	1689	6	+	Nicotiana tabacum
PdWRKY11b	AT-rich sequence	TAAAATACT	1404	9	-	Pisum sativum	element for maximal elicitor-mediated activation (2copies)
PdWRKY11b	AAGAA-motif	GAAAGAA	75	7	-	Avena sativa
PdWRKY11b	AAGAA-motif	GAAAGAA	915	7	-	Avena sativa
PdWRKY11b	WUN-motif	CCATTTCAA	211	9	+	Nicotiana glutinosa
PdWRKY11b	A-box	CCGTCC	1689	6	+	Petroselinum crispum	cis-acting regulatory element
PdWRKY11b	CAAT-box	CAAT	1	4	+	Nicotiana glutinosa
PdWRKY11b	CAAT-box	CCAAT	59	5	+	Arabidopsis thaliana	common cis-acting element in promoter and enhancer regions
PdWRKY11b	CAAT-box	CAAT	60	4	+	Nicotiana glutinosa
PdWRKY11b	CAAT-box	CAAT	70	4	-	Nicotiana glutinosa
PdWRKY11b	CAAT-box	CAAT	90	4	+	Nicotiana glutinosa
PdWRKY11b	CAAT-box	CAAT	95	4	+	Nicotiana glutinosa
PdWRKY11b	CAAT-box	CAAT	103	4	+	Nicotiana glutinosa
PdWRKY11b	CAAT-box	CAAAT	113	5	+	Pisum sativum	common cis-acting element in promoter and enhancer regions
PdWRKY11b	CAAT-box	CAAAT	164	5	+	Pisum sativum	common cis-acting element in promoter and enhancer regions
PdWRKY11b	CAAT-box	CAAT	169	4	+	Nicotiana glutinosa
PdWRKY11b	CAAT-box	CAAT	192	4	-	Nicotiana glutinosa
PdWRKY11b	CAAT-box	CAAAT	436	5	-	Pisum sativum	common cis-acting element in promoter and enhancer regions
PdWRKY11b	CAAT-box	CAAT	491	4	+	Nicotiana glutinosa
PdWRKY11b	CAAT-box	CAAT	508	4	+	Nicotiana glutinosa
PdWRKY11b	CAAT-box	CCAAT	548	5	+	Arabidopsis thaliana	common cis-acting element in promoter and enhancer regions
PdWRKY11b	CAAT-box	CAAT	549	4	+	Nicotiana glutinosa
PdWRKY11b	CAAT-box	CAAT	551	4	-	Nicotiana glutinosa
PdWRKY11b	CAAT-box	CAAAT	637	5	+	Pisum sativum	common cis-acting element in promoter and enhancer regions
PdWRKY11b	CAAT-box	CAAAT	820	5	-	Pisum sativum	common cis-acting element in promoter and enhancer regions
PdWRKY11b	CAAT-box	CAAT	934	4	-	Nicotiana glutinosa
PdWRKY11b	CAAT-box	CAAAT	947	5	+	Pisum sativum	common cis-acting element in promoter and enhancer regions
PdWRKY11b	CAAT-box	CAAAT	957	5	-	Pisum sativum	common cis-acting element in promoter and enhancer regions
PdWRKY11b	CAAT-box	CAAT	1068	4	+	Nicotiana glutinosa
PdWRKY11b	CAAT-box	CAAAT	1092	5	-	Pisum sativum	common cis-acting element in promoter and enhancer regions
PdWRKY11b	CAAT-box	CAAAT	1101	5	+	Pisum sativum	common cis-acting element in promoter and enhancer regions
PdWRKY11b	CAAT-box	CAAAT	1122	5	+	Pisum sativum	common cis-acting element in promoter and enhancer regions
PdWRKY11b	CAAT-box	CAAAT	1133	5	+	Pisum sativum	common cis-acting element in promoter and enhancer regions
PdWRKY11b	CAAT-box	CAAAT	1165	5	+	Pisum sativum	common cis-acting element in promoter and enhancer regions
PdWRKY11b	CAAT-box	CAAT	1189	4	-	Nicotiana glutinosa
PdWRKY11b	CAAT-box	CAAAT	1247	5	-	Pisum sativum	common cis-acting element in promoter and enhancer regions
PdWRKY11b	CAAT-box	CAAT	1328	4	+	Nicotiana glutinosa
PdWRKY11b	CAAT-box	CCAAT	1364	5	+	Arabidopsis thaliana	common cis-acting element in promoter and enhancer regions
PdWRKY11b	CAAT-box	CAAT	1365	4	+	Nicotiana glutinosa
PdWRKY11b	CAAT-box	CAAAT	1417	5	-	Pisum sativum	common cis-acting element in promoter and enhancer regions
PdWRKY11b	CAAT-box	CAAT	1434	4	-	Nicotiana glutinosa
PdWRKY11b	CAAT-box	CAAAT	1480	5	-	Pisum sativum	common cis-acting element in promoter and enhancer regions
PdWRKY11b	CAAT-box	CAAAT	1559	5	-	Pisum sativum	common cis-acting element in promoter and enhancer regions
PdWRKY11b	CAAT-box	CAAT	1574	4	+	Nicotiana glutinosa
PdWRKY11b	CAAT-box	CAAAT	1632	5	+	Pisum sativum	common cis-acting element in promoter and enhancer regions
PdWRKY11b	CAAT-box	CAAT	1644	4	-	Nicotiana glutinosa
PdWRKY11b	CAAT-box	CAAT	1655	4	+	Nicotiana glutinosa
PdWRKY11b	CAAT-box	CAAAT	1670	5	-	Pisum sativum	common cis-acting element in promoter and enhancer regions
PdWRKY11b	CAAT-box	CAAAT	1843	5	-	Pisum sativum	common cis-acting element in promoter and enhancer regions
PdWRKY11b	CAAT-box	CCAAT	1979	5	+	Arabidopsis thaliana	common cis-acting element in promoter and enhancer regions
PdWRKY11b	CAAT-box	CAAT	1980	4	+	Nicotiana glutinosa
PdWRKY11b	chs-CMA1a	TTACTTAA	1055	8	+	Daucus carota	part of a light responsive element
PdWRKY11b	MBS	CAACTG	474	6	-	Arabidopsis thaliana	MYB binding site involved in drought-inducibility
PdWRKY11b	LTR	CCGAAA	597	6	-	Hordeum vulgare	cis-acting element involved in low-temperature responsiveness
PdWRKY11b	G-box	CACGTC	359	6	-	Zea mays	cis-acting regulatory element involved in light responsiveness
PdWRKY11b	G-box	TAAACGTG	399	8	-	Brassica oleracea	cis-acting regulatory element involved in light responsiveness
PdWRKY11b	Unnamed__4	CTCC	36	4	+	Petroselinum hortense
PdWRKY11b	Unnamed__4	CTCC	256	4	-	Petroselinum hortense
PdWRKY11b	Unnamed__4	CTCC	787	4	-	Petroselinum hortense
PdWRKY11b	Unnamed__4	CTCC	870	4	+	Petroselinum hortense
PdWRKY11b	Unnamed__4	CTCC	898	4	-	Petroselinum hortense
PdWRKY11b	Unnamed__4	CTCC	1339	4	+	Petroselinum hortense
PdWRKY11b	Unnamed__4	CTCC	1394	4	-	Petroselinum hortense
PdWRKY11b	Unnamed__4	CTCC	1782	4	+	Petroselinum hortense
PdWRKY11b	Unnamed__4	CTCC	1814	4	+	Petroselinum hortense
PdWRKY11b	Unnamed__4	CTCC	1817	4	+	Petroselinum hortense
PdWRKY11b	Unnamed__4	CTCC	1855	4	+	Petroselinum hortense
PdWRKY11b	Unnamed__4	CTCC	1914	4	+	Petroselinum hortense
PdWRKY11b	Unnamed__4	CTCC	1976	4	+	Petroselinum hortense
PdWRKY11b	O2-site	GATGATGTGG	81	9	-	Zea mays	cis-acting regulatory element involved in zein metabolism regulation
PdWRKY11b	ERE	ATTTTAAA	1407	8	+	Nicotiana glutinos
PdWRKY11b	ERE	ATTTTAAA	1450	8	-	Nicotiana glutinos
PdWRKY12	TGACG-motif	TGACG	65	5	+	Hordeum vulgare	cis-acting regulatory element involved in the MeJA-responsiveness
PdWRKY12	STRE	AGGGG	416	5	-	Arabidopsis thaliana
PdWRKY12	STRE	AGGGG	1660	5	+	Arabidopsis thaliana
PdWRKY12	STRE	AGGGG	1722	5	+	Arabidopsis thaliana
PdWRKY12	STRE	AGGGG	1961	5	+	Arabidopsis thaliana
PdWRKY12	Box 4	ATTAAT	216	6	+	Petroselinum crispum	part of a conserved DNA module involved in light responsiveness
PdWRKY12	Box 4	ATTAAT	814	6	+	Petroselinum crispum	part of a conserved DNA module involved in light responsiveness
PdWRKY12	Box 4	ATTAAT	888	6	+	Petroselinum crispum	part of a conserved DNA module involved in light responsiveness
PdWRKY12	Box 4	ATTAAT	1829	6	-	Petroselinum crispum	part of a conserved DNA module involved in light responsiveness
PdWRKY12	GATA-motif	GATAGGG	389	7	-	Pisum sativum	part of a light responsive element
PdWRKY12	Unnamed__2	CCCCGG	903	6	-	Zea mays
PdWRKY12	CAAT-box	CAAT	14	4	-	Nicotiana glutinosa
PdWRKY12	CAAT-box	CAAAT	162	5	+	Pisum sativum	common cis-acting element in promoter and enhancer regions
PdWRKY12	CAAT-box	CAAT	176	4	-	Nicotiana glutinosa
PdWRKY12	CAAT-box	CAAAT	186	5	+	Pisum sativum	common cis-acting element in promoter and enhancer regions
PdWRKY12	CAAT-box	CAAAT	243	5	-	Pisum sativum	common cis-acting element in promoter and enhancer regions
PdWRKY12	CAAT-box	CCAAT	275	5	+	Arabidopsis thaliana	common cis-acting element in promoter and enhancer regions
PdWRKY12	CAAT-box	CAAT	276	4	+	Nicotiana glutinosa
PdWRKY12	CAAT-box	CAAAT	286	5	+	Pisum sativum	common cis-acting element in promoter and enhancer regions
PdWRKY12	CAAT-box	CAAT	316	4	+	Nicotiana glutinosa
PdWRKY12	CAAT-box	CAAAT	345	5	+	Pisum sativum	common cis-acting element in promoter and enhancer regions
PdWRKY12	CAAT-box	CCAAT	557	5	+	Arabidopsis thaliana	common cis-acting element in promoter and enhancer regions
PdWRKY12	CAAT-box	CAAT	558	4	+	Nicotiana glutinosa
PdWRKY12	CAAT-box	CAAAT	592	5	+	Pisum sativum	common cis-acting element in promoter and enhancer regions
PdWRKY12	CAAT-box	CAAT	692	4	-	Nicotiana glutinosa
PdWRKY12	CAAT-box	CCAAT	707	5	-	Arabidopsis thaliana	common cis-acting element in promoter and enhancer regions
PdWRKY12	CAAT-box	CAAT	739	4	+	Nicotiana glutinosa
PdWRKY12	CAAT-box	CAAT	769	4	-	Nicotiana glutinosa
PdWRKY12	CAAT-box	CAAT	1015	4	+	Nicotiana glutinosa
PdWRKY12	CAAT-box	CAAT	1193	4	+	Nicotiana glutinosa
PdWRKY12	CAAT-box	CAAT	1229	4	+	Nicotiana glutinosa
PdWRKY12	CAAT-box	CCAAT	1272	5	-	Arabidopsis thaliana	common cis-acting element in promoter and enhancer regions
PdWRKY12	CAAT-box	CAAAT	1292	5	-	Pisum sativum	common cis-acting element in promoter and enhancer regions
PdWRKY12	CAAT-box	CAAAT	1362	5	-	Pisum sativum	common cis-acting element in promoter and enhancer regions
PdWRKY12	CAAT-box	CCAAT	1543	5	-	Arabidopsis thaliana	common cis-acting element in promoter and enhancer regions
PdWRKY12	CAAT-box	CAAAT	1597	5	-	Pisum sativum	common cis-acting element in promoter and enhancer regions
PdWRKY12	CAAT-box	CAAAT	1631	5	+	Pisum sativum	common cis-acting element in promoter and enhancer regions
PdWRKY12	CAAT-box	CAAAT	1667	5	+	Pisum sativum	common cis-acting element in promoter and enhancer regions
PdWRKY12	CAAT-box	CCAAT	1853	5	+	Arabidopsis thaliana	common cis-acting element in promoter and enhancer regions
PdWRKY12	CAAT-box	CAAT	1854	4	+	Nicotiana glutinosa
PdWRKY12	CAAT-box	CAAT	1917	4	-	Nicotiana glutinosa
PdWRKY12	AuxRR-core	GGTCCAT	552	7	-	Nicotiana tabacum	cis-acting regulatory element involved in auxin responsiveness
PdWRKY12	WRE3	CCACCT	332	6	+	Pisum sativum
PdWRKY12	WRE3	CCACCT	395	6	+	Pisum sativum
PdWRKY12	as-1	TGACG	65	5	+	Arabidopsis thaliana
PdWRKY12	LTR	CCGAAA	828	6	-	Hordeum vulgare	cis-acting element involved in low-temperature responsiveness
PdWRKY12	LTR	CCGAAA	1577	6	+	Hordeum vulgare	cis-acting element involved in low-temperature responsiveness
PdWRKY12	Unnamed__4	CTCC	355	4	-	Petroselinum hortense
PdWRKY12	Unnamed__4	CTCC	376	4	+	Petroselinum hortense
PdWRKY12	Unnamed__4	CTCC	387	4	+	Petroselinum hortense
PdWRKY12	Unnamed__4	CTCC	399	4	+	Petroselinum hortense
PdWRKY12	Unnamed__4	CTCC	422	4	-	Petroselinum hortense
PdWRKY12	Unnamed__4	CTCC	426	4	+	Petroselinum hortense
PdWRKY12	Unnamed__4	CTCC	439	4	-	Petroselinum hortense
PdWRKY12	Unnamed__4	CTCC	453	4	+	Petroselinum hortense
PdWRKY12	Unnamed__4	CTCC	463	4	+	Petroselinum hortense
PdWRKY12	Unnamed__4	CTCC	589	4	+	Petroselinum hortense
PdWRKY12	Unnamed__4	CTCC	600	4	-	Petroselinum hortense
PdWRKY12	Unnamed__4	CTCC	611	4	-	Petroselinum hortense
PdWRKY12	Unnamed__4	CTCC	633	4	+	Petroselinum hortense
PdWRKY12	Unnamed__4	CTCC	1374	4	-	Petroselinum hortense
PdWRKY12	Unnamed__4	CTCC	1663	4	-	Petroselinum hortense
PdWRKY12	Unnamed__4	CTCC	1720	4	-	Petroselinum hortense
PdWRKY12	Unnamed__4	CTCC	1912	4	-	Petroselinum hortense
PdWRKY12	Unnamed__4	CTCC	1965	4	-	Petroselinum hortense
PdWRKY12	ERE	ATTTTAAA	140	8	+	Nicotiana glutinos
PdWRKY12	ATCT-motif	AATCTAATCC	1301	9	+	Pisum sativum	part of a conserved DNA module involved in light responsiveness
PdWRKY12	MYB	CAACCA	379	6	+	Arabidopsis thaliana
PdWRKY12	MYB	CAACCA	606	6	-	Arabidopsis thaliana
PdWRKY12	MYB	CAACCA	910	6	-	Arabidopsis thaliana
PdWRKY12	MYB	TAACCA	987	6	-	Arabidopsis thaliana
PdWRKY12	MYB	CAACAG	1040	6	-	Arabidopsis thaliana
PdWRKY12	MYB	CAACCA	1274	6	-	Arabidopsis thaliana
PdWRKY12	AT1-motif	AATTATTTTTTATT	521	13	+	Solanum tuberosum	part of a light responsive module
PdWRKY12	TATA-box	ATATAT	10	6	+	Brassica napus	core promoter element around -30 of transcription start
PdWRKY12	TATA-box	TATA	11	4	+	Arabidopsis thaliana	core promoter element around -30 of transcription start
PdWRKY12	TATA-box	TATACA	84	6	-	Helianthus annuus	core promoter element around -30 of transcription start
PdWRKY12	TATA-box	TATATA	86	6	+	Arabidopsis thaliana	core promoter element around -30 of transcription start
PdWRKY12	TATA-box	ATATAT	87	6	+	Brassica napus	core promoter element around -30 of transcription start
PdWRKY12	TATA-box	TATA	88	4	+	Arabidopsis thaliana	core promoter element around -30 of transcription start
PdWRKY12	TATA-box	ATATAT	97	6	+	Brassica napus	core promoter element around -30 of transcription start
PdWRKY12	TATA-box	TATATA	98	6	+	Arabidopsis thaliana	core promoter element around -30 of transcription start
PdWRKY12	TATA-box	TATA	100	4	+	Arabidopsis thaliana	core promoter element around -30 of transcription start
PdWRKY12	TATA-box	ATATAT	109	6	+	Brassica napus	core promoter element around -30 of transcription start
PdWRKY12	TATA-box	TATA	110	4	+	Arabidopsis thaliana	core promoter element around -30 of transcription start
PdWRKY12	TATA-box	TATA	118	4	+	Arabidopsis thaliana	core promoter element around -30 of transcription start
PdWRKY12	TATA-box	TATAAAT	292	7	-	Brassica juncea	core promoter element around -30 of transcription start
PdWRKY12	TATA-box	TATAAA	293	6	-	Helianthus annuus	core promoter element around -30 of transcription start
PdWRKY12	TATA-box	TATAA	294	5	-	Arabidopsis thaliana	core promoter element around -30 of transcription start
PdWRKY12	TATA-box	TATA	295	4	+	Arabidopsis thaliana	core promoter element around -30 of transcription start
PdWRKY12	TATA-box	TATA	468	4	+	Arabidopsis thaliana	core promoter element around -30 of transcription start
PdWRKY12	TATA-box	TATAA	572	5	-	Arabidopsis thaliana	core promoter element around -30 of transcription start
PdWRKY12	TATA-box	TATA	573	4	+	Arabidopsis thaliana	core promoter element around -30 of transcription start
PdWRKY12	TATA-box	TATAAGAA	647	8	-	Zea mays	core promoter element around -30 of transcription start
PdWRKY12	TATA-box	TATAA	650	5	-	Arabidopsis thaliana	core promoter element around -30 of transcription start
PdWRKY12	TATA-box	TATA	651	4	+	Arabidopsis thaliana	core promoter element around -30 of transcription start
PdWRKY12	TATA-box	TATA	764	4	+	Arabidopsis thaliana	core promoter element around -30 of transcription start
PdWRKY12	TATA-box	TATACA	776	6	-	Helianthus annuus	core promoter element around -30 of transcription start
PdWRKY12	TATA-box	TATA	778	4	+	Arabidopsis thaliana	core promoter element around -30 of transcription start
PdWRKY12	TATA-box	TACATAAA	792	8	-	Oryza sativa	core promoter element around -30 of transcription start
PdWRKY12	TATA-box	TATA	802	4	+	Arabidopsis thaliana	core promoter element around -30 of transcription start
PdWRKY12	TATA-box	ATATAT	807	6	+	Brassica napus	core promoter element around -30 of transcription start
PdWRKY12	TATA-box	TATA	808	4	+	Arabidopsis thaliana	core promoter element around -30 of transcription start
PdWRKY12	TATA-box	TATACA	838	6	-	Helianthus annuus	core promoter element around -30 of transcription start
PdWRKY12	TATA-box	TATATA	840	6	+	Arabidopsis thaliana	core promoter element around -30 of transcription start
PdWRKY12	TATA-box	ATATAA	841	6	+	Brassica oleracea	core promoter element around -30 of transcription start
PdWRKY12	TATA-box	TATA	842	4	+	Arabidopsis thaliana	core promoter element around -30 of transcription start
PdWRKY12	TATA-box	TATATA	1099	6	-	Arabidopsis thaliana	core promoter element around -30 of transcription start
PdWRKY12	TATA-box	ATATAT	1100	6	-	Brassica napus	core promoter element around -30 of transcription start
PdWRKY12	TATA-box	TATA	1101	4	-	Arabidopsis thaliana	core promoter element around -30 of transcription start
PdWRKY12	TATA-box	TATTTAAA	1115	8	-	Arabidopsis thaliana	core promoter element around -30 of transcription start
PdWRKY12	TATA-box	TATA	1121	4	-	Arabidopsis thaliana	core promoter element around -30 of transcription start
PdWRKY12	TATA-box	ATATAT	1201	6	-	Brassica napus	core promoter element around -30 of transcription start
PdWRKY12	TATA-box	TATATA	1202	6	-	Arabidopsis thaliana	core promoter element around -30 of transcription start
PdWRKY12	TATA-box	ATATAT	1203	6	-	Brassica napus	core promoter element around -30 of transcription start
PdWRKY12	TATA-box	TATA	1204	4	-	Arabidopsis thaliana	core promoter element around -30 of transcription start
PdWRKY12	TATA-box	TATAAAT	1212	7	-	Brassica juncea	core promoter element around -30 of transcription start
PdWRKY12	TATA-box	TATAAA	1213	6	-	Helianthus annuus	core promoter element around -30 of transcription start
PdWRKY12	TATA-box	TATAA	1214	5	-	Arabidopsis thaliana	core promoter element around -30 of transcription start
PdWRKY12	TATA-box	TATA	1215	4	-	Arabidopsis thaliana	core promoter element around -30 of transcription start
PdWRKY12	TATA-box	ccTATAAAaa	1413	9	+	Arabidopsis thaliana	core promoter element around -30 of transcription start
PdWRKY12	TATA-box	TATA	1415	4	-	Arabidopsis thaliana	core promoter element around -30 of transcription start
PdWRKY12	TATA-box	TATAAAA	1609	7	-	Pisum sativum	core promoter element around -30 of transcription start
PdWRKY12	TATA-box	TATAAA	1610	6	-	Helianthus annuus	core promoter element around -30 of transcription start
PdWRKY12	TATA-box	TATAA	1611	5	-	Arabidopsis thaliana	core promoter element around -30 of transcription start
PdWRKY12	TATA-box	TATA	1612	4	-	Arabidopsis thaliana	core promoter element around -30 of transcription start
PdWRKY12	TATA-box	TATAAAA	1677	7	-	Pisum sativum	core promoter element around -30 of transcription start
PdWRKY12	TATA-box	TATAAA	1678	6	-	Helianthus annuus	core promoter element around -30 of transcription start
PdWRKY12	TATA-box	TATAA	1679	5	-	Arabidopsis thaliana	core promoter element around -30 of transcription start
PdWRKY12	TATA-box	TATA	1680	4	-	Arabidopsis thaliana	core promoter element around -30 of transcription start
PdWRKY12	TATA-box	TATA	1701	4	-	Arabidopsis thaliana	core promoter element around -30 of transcription start
PdWRKY12	TATA-box	TATAA	1793	5	-	Arabidopsis thaliana	core promoter element around -30 of transcription start
PdWRKY12	TATA-box	TATA	1794	4	-	Arabidopsis thaliana	core promoter element around -30 of transcription start
PdWRKY12	ABRE	ACGTG	1464	5	-	Arabidopsis thaliana	cis-acting element involved in the abscisic acid responsiveness
PdWRKY12	G-Box	CACGTT	1464	6	+	Pisum sativum	cis-acting regulatory element involved in light responsiveness
PdWRKY12		motif_sequence	180	4	+	organism	short_function
PdWRKY12		motif_sequence	439	4	-	organism	short_function
PdWRKY12		motif_sequence	587	4	+	organism	short_function
PdWRKY12		motif_sequence	795	4	+	organism	short_function
PdWRKY12		motif_sequence	797	4	-	organism	short_function
PdWRKY12		motif_sequence	833	4	-	organism	short_function
PdWRKY12		motif_sequence	898	4	+	organism	short_function
PdWRKY12		motif_sequence	925	4	+	organism	short_function
PdWRKY12		motif_sequence	1218	4	+	organism	short_function
PdWRKY12		motif_sequence	1242	4	-	organism	short_function
PdWRKY12		motif_sequence	1563	4	-	organism	short_function
PdWRKY12		motif_sequence	1965	4	-	organism	short_function
PdWRKY12	TCT-motif	TCTTAC	732	6	+	Arabidopsis thaliana	part of a light responsive element
PdWRKY12	TCT-motif	TCTTAC	1991	6	+	Arabidopsis thaliana	part of a light responsive element
PdWRKY12	Myb-binding site	CAACAG	1040	6	-	Nicotiana tabacum
PdWRKY12	GC-motif	CCCCCG	904	6	-	Zea mays	enhancer-like element involved in anoxic specific inducibility
PdWRKY12	MYC	CATGTG	1346	6	-	Arabidopsis thaliana
PdWRKY12	MYC	CATGTG	1348	6	+	Arabidopsis thaliana
PdWRKY12	MYC	CATTTG	1631	6	-	Arabidopsis thaliana
PdWRKY12	MYC	CATTTG	1667	6	-	Arabidopsis thaliana
PdWRKY12	GT1-motif	GGTTAA	1525	6	+	Arabidopsis thaliana	light responsive element
PdWRKY12	AT~TATA-box	TATATA	86	6	+	Arabidopsis thaliana
PdWRKY12	AT~TATA-box	TATATA	98	6	+	Arabidopsis thaliana
PdWRKY12	AT~TATA-box	TATATA	840	6	+	Arabidopsis thaliana
PdWRKY12	AT~TATA-box	TATATA	1099	6	-	Arabidopsis thaliana
PdWRKY12	AT~TATA-box	TATATA	1202	6	-	Arabidopsis thaliana
PdWRKY12	MYB-like sequence	TAACCA	987	6	-	Arabidopsis thaliana
PdWRKY12	CGTCA-motif	CGTCA	65	5	-	Hordeum vulgare	cis-acting regulatory element involved in the MeJA-responsiveness
PdWRKY12	ARE	AAACCA	122	6	-	Zea mays	cis-acting regulatory element essential for the anaerobic induction
PdWRKY12	ARE	AAACCA	329	6	+	Zea mays	cis-acting regulatory element essential for the anaerobic induction
PdWRKY12	ARE	AAACCA	709	6	-	Zea mays	cis-acting regulatory element essential for the anaerobic induction
PdWRKY12	TATA	TATAAAAT	1676	8	-	Arabidopsis thaliana
PdWRKY13	TGACG-motif	TGACG	1029	5	+	Hordeum vulgare	cis-acting regulatory element involved in the MeJA-responsiveness
PdWRKY13	W box	TTGACC	1821	6	+	Arabidopsis thaliana
PdWRKY13	TCA	TCATCTTCAT	1629	9	+	Pisum sativum
PdWRKY13	STRE	AGGGG	631	5	-	Arabidopsis thaliana
PdWRKY13	STRE	AGGGG	1127	5	-	Arabidopsis thaliana
PdWRKY13	CAAT-box	CAAT	52	4	-	Nicotiana glutinosa
PdWRKY13	CAAT-box	CAAT	69	4	+	Nicotiana glutinosa
PdWRKY13	CAAT-box	CAAAT	76	5	-	Pisum sativum	common cis-acting element in promoter and enhancer regions
PdWRKY13	CAAT-box	CAAAT	88	5	+	Pisum sativum	common cis-acting element in promoter and enhancer regions
PdWRKY13	CAAT-box	CAAT	202	4	+	Nicotiana glutinosa
PdWRKY13	CAAT-box	CAAT	204	4	-	Nicotiana glutinosa
PdWRKY13	CAAT-box	CAAT	209	4	+	Nicotiana glutinosa
PdWRKY13	CAAT-box	CAAT	266	4	+	Nicotiana glutinosa
PdWRKY13	CAAT-box	CCAAT	292	5	+	Arabidopsis thaliana	common cis-acting element in promoter and enhancer regions
PdWRKY13	CAAT-box	CAAT	293	4	+	Nicotiana glutinosa
PdWRKY13	CAAT-box	CAAAT	310	5	+	Pisum sativum	common cis-acting element in promoter and enhancer regions
PdWRKY13	CAAT-box	CAAT	318	4	+	Nicotiana glutinosa
PdWRKY13	CAAT-box	CAAAT	335	5	+	Pisum sativum	common cis-acting element in promoter and enhancer regions
PdWRKY13	CAAT-box	CAAAT	350	5	-	Pisum sativum	common cis-acting element in promoter and enhancer regions
PdWRKY13	CAAT-box	CAAT	398	4	-	Nicotiana glutinosa
PdWRKY13	CAAT-box	CAAT	410	4	-	Nicotiana glutinosa
PdWRKY13	CAAT-box	CAAT	462	4	+	Nicotiana glutinosa
PdWRKY13	CAAT-box	CAAT	533	4	+	Nicotiana glutinosa
PdWRKY13	CAAT-box	CAAT	552	4	+	Nicotiana glutinosa
PdWRKY13	CAAT-box	CAAAT	640	5	-	Pisum sativum	common cis-acting element in promoter and enhancer regions
PdWRKY13	CAAT-box	CCAAT	708	5	-	Arabidopsis thaliana	common cis-acting element in promoter and enhancer regions
PdWRKY13	CAAT-box	CAAAT	731	5	-	Pisum sativum	common cis-acting element in promoter and enhancer regions
PdWRKY13	CAAT-box	CAAT	736	4	+	Nicotiana glutinosa
PdWRKY13	CAAT-box	CAAAT	851	5	+	Pisum sativum	common cis-acting element in promoter and enhancer regions
PdWRKY13	CAAT-box	CAAT	886	4	-	Nicotiana glutinosa
PdWRKY13	CAAT-box	CAAT	895	4	-	Nicotiana glutinosa
PdWRKY13	CAAT-box	CAAAT	922	5	+	Pisum sativum	common cis-acting element in promoter and enhancer regions
PdWRKY13	CAAT-box	CAAAT	954	5	+	Pisum sativum	common cis-acting element in promoter and enhancer regions
PdWRKY13	CAAT-box	CAAT	1055	4	+	Nicotiana glutinosa
PdWRKY13	CAAT-box	CAAT	1090	4	-	Nicotiana glutinosa
PdWRKY13	CAAT-box	CAAAT	1104	5	+	Pisum sativum	common cis-acting element in promoter and enhancer regions
PdWRKY13	CAAT-box	CAAAT	1115	5	-	Pisum sativum	common cis-acting element in promoter and enhancer regions
PdWRKY13	CAAT-box	CAAT	1149	4	-	Nicotiana glutinosa
PdWRKY13	CAAT-box	CAAAT	1166	5	+	Pisum sativum	common cis-acting element in promoter and enhancer regions
PdWRKY13	CAAT-box	CAAT	1169	4	-	Nicotiana glutinosa
PdWRKY13	CAAT-box	CAAAT	1234	5	-	Pisum sativum	common cis-acting element in promoter and enhancer regions
PdWRKY13	CAAT-box	CAAT	1245	4	+	Nicotiana glutinosa
PdWRKY13	CAAT-box	CAAT	1291	4	-	Nicotiana glutinosa
PdWRKY13	CAAT-box	CAAT	1308	4	+	Nicotiana glutinosa
PdWRKY13	CAAT-box	CCAAT	1310	5	-	Arabidopsis thaliana	common cis-acting element in promoter and enhancer regions
PdWRKY13	CAAT-box	CAAAT	1333	5	-	Pisum sativum	common cis-acting element in promoter and enhancer regions
PdWRKY13	CAAT-box	CAAAT	1388	5	-	Pisum sativum	common cis-acting element in promoter and enhancer regions
PdWRKY13	CAAT-box	CCAAT	1397	5	-	Arabidopsis thaliana	common cis-acting element in promoter and enhancer regions
PdWRKY13	CAAT-box	CAAT	1409	4	-	Nicotiana glutinosa
PdWRKY13	CAAT-box	CAAAT	1437	5	+	Pisum sativum	common cis-acting element in promoter and enhancer regions
PdWRKY13	CAAT-box	CAAAT	1448	5	-	Pisum sativum	common cis-acting element in promoter and enhancer regions
PdWRKY13	CAAT-box	CAAT	1463	4	+	Nicotiana glutinosa
PdWRKY13	CAAT-box	CAAAT	1590	5	-	Pisum sativum	common cis-acting element in promoter and enhancer regions
PdWRKY13	CAAT-box	CAAT	1845	4	-	Nicotiana glutinosa
PdWRKY13	CAAT-box	CAAT	1971	4	-	Nicotiana glutinosa
PdWRKY13	CAAT-box	CAAAT	1978	5	-	Pisum sativum	common cis-acting element in promoter and enhancer regions
PdWRKY13	CAAT-box	CAAAT	1988	5	+	Pisum sativum	common cis-acting element in promoter and enhancer regions
PdWRKY13	AAGAA-motif	GAAAGAA	540	7	+	Avena sativa
PdWRKY13	AAGAA-motif	GAAAGAA	1695	7	+	Avena sativa
PdWRKY13	LTR	CCGAAA	602	6	+	Hordeum vulgare	cis-acting element involved in low-temperature responsiveness
PdWRKY13	LTR	CCGAAA	1526	6	-	Hordeum vulgare	cis-acting element involved in low-temperature responsiveness
PdWRKY13	as-1	TGACG	1029	5	+	Arabidopsis thaliana
PdWRKY13	Unnamed__4	CTCC	35	4	-	Petroselinum hortense
PdWRKY13	Unnamed__4	CTCC	82	4	-	Petroselinum hortense
PdWRKY13	Unnamed__4	CTCC	629	4	+	Petroselinum hortense
PdWRKY13	Unnamed__4	CTCC	1143	4	+	Petroselinum hortense
PdWRKY13	Unnamed__4	CTCC	1471	4	-	Petroselinum hortense
PdWRKY13	Unnamed__4	CTCC	1759	4	+	Petroselinum hortense
PdWRKY13	Unnamed__4	CTCC	1910	4	+	Petroselinum hortense
PdWRKY13	Unnamed__4	CTCC	1963	4	-	Petroselinum hortense
PdWRKY13	Unnamed__6	taTAAATATct	1989	10	-	Zea mays
PdWRKY13	O2-site	GATGATGTGG	1384	9	+	Zea mays	cis-acting regulatory element involved in zein metabolism regulation
PdWRKY13	G-box	ACACGTGT	945	8	+	Brassica napus	cis-acting regulatory element involved in light responsiveness
PdWRKY13	G-box	CACGTG	946	6	+	Arabidopsis thaliana	cis-acting regulatory element involved in light responsiveness
PdWRKY13	Gap-box	CAAATGAA(A/G)A	635	9	-	Arabidopsis thaliana	part of a light responsive element
PdWRKY13	TATA-box	ATATAT	42	6	+	Brassica napus	core promoter element around -30 of transcription start
PdWRKY13	TATA-box	TATA	43	4	+	Arabidopsis thaliana	core promoter element around -30 of transcription start
PdWRKY13	TATA-box	TATAAAA	59	7	-	Pisum sativum	core promoter element around -30 of transcription start
PdWRKY13	TATA-box	TATAAA	60	6	-	Helianthus annuus	core promoter element around -30 of transcription start
PdWRKY13	TATA-box	TATAA	61	5	-	Arabidopsis thaliana	core promoter element around -30 of transcription start
PdWRKY13	TATA-box	TATA	62	4	+	Arabidopsis thaliana	core promoter element around -30 of transcription start
PdWRKY13	TATA-box	TATA	146	4	+	Arabidopsis thaliana	core promoter element around -30 of transcription start
PdWRKY13	TATA-box	TATA	269	4	+	Arabidopsis thaliana	core promoter element around -30 of transcription start
PdWRKY13	TATA-box	TATATA	274	6	+	Arabidopsis thaliana	core promoter element around -30 of transcription start
PdWRKY13	TATA-box	TATA	276	4	+	Arabidopsis thaliana	core promoter element around -30 of transcription start
PdWRKY13	TATA-box	ATATAA	295	6	+	Brassica oleracea	core promoter element around -30 of transcription start
PdWRKY13	TATA-box	TATA	296	4	+	Arabidopsis thaliana	core promoter element around -30 of transcription start
PdWRKY13	TATA-box	TATA	465	4	+	Arabidopsis thaliana	core promoter element around -30 of transcription start
PdWRKY13	TATA-box	ATTATA	694	6	+	Brassica napus	core promoter element around -30 of transcription start
PdWRKY13	TATA-box	TATAA	695	5	-	Arabidopsis thaliana	core promoter element around -30 of transcription start
PdWRKY13	TATA-box	TATA	696	4	+	Arabidopsis thaliana	core promoter element around -30 of transcription start
PdWRKY13	TATA-box	TATA	739	4	+	Arabidopsis thaliana	core promoter element around -30 of transcription start
PdWRKY13	TATA-box	TATACA	890	6	-	Helianthus annuus	core promoter element around -30 of transcription start
PdWRKY13	TATA-box	TATA	892	4	+	Arabidopsis thaliana	core promoter element around -30 of transcription start
PdWRKY13	TATA-box	ATATAT	906	6	+	Brassica napus	core promoter element around -30 of transcription start
PdWRKY13	TATA-box	TATATA	907	6	+	Arabidopsis thaliana	core promoter element around -30 of transcription start
PdWRKY13	TATA-box	ATATAA	908	6	+	Brassica oleracea	core promoter element around -30 of transcription start
PdWRKY13	TATA-box	TATA	909	4	+	Arabidopsis thaliana	core promoter element around -30 of transcription start
PdWRKY13	TATA-box	ATTATA	939	6	+	Brassica napus	core promoter element around -30 of transcription start
PdWRKY13	TATA-box	TATAA	940	5	-	Arabidopsis thaliana	core promoter element around -30 of transcription start
PdWRKY13	TATA-box	TATA	941	4	+	Arabidopsis thaliana	core promoter element around -30 of transcription start
PdWRKY13	TATA-box	ATATAT	963	6	+	Brassica napus	core promoter element around -30 of transcription start
PdWRKY13	TATA-box	TATATA	964	6	+	Arabidopsis thaliana	core promoter element around -30 of transcription start
PdWRKY13	TATA-box	TATA	966	4	+	Arabidopsis thaliana	core promoter element around -30 of transcription start
PdWRKY13	TATA-box	ATATAT	1004	6	-	Brassica napus	core promoter element around -30 of transcription start
PdWRKY13	TATA-box	TATA	1005	4	-	Arabidopsis thaliana	core promoter element around -30 of transcription start
PdWRKY13	TATA-box	TATACA	1009	6	-	Helianthus annuus	core promoter element around -30 of transcription start
PdWRKY13	TATA-box	TATA	1011	4	-	Arabidopsis thaliana	core promoter element around -30 of transcription start
PdWRKY13	TATA-box	TATA	1048	4	-	Arabidopsis thaliana	core promoter element around -30 of transcription start
PdWRKY13	TATA-box	ATATAT	1057	6	-	Brassica napus	core promoter element around -30 of transcription start
PdWRKY13	TATA-box	TATATA	1058	6	-	Arabidopsis thaliana	core promoter element around -30 of transcription start
PdWRKY13	TATA-box	ATATAT	1059	6	-	Brassica napus	core promoter element around -30 of transcription start
PdWRKY13	TATA-box	TATATA	1060	6	-	Arabidopsis thaliana	core promoter element around -30 of transcription start
PdWRKY13	TATA-box	ATATAT	1061	6	-	Brassica napus	core promoter element around -30 of transcription start
PdWRKY13	TATA-box	TATATA	1062	6	-	Arabidopsis thaliana	core promoter element around -30 of transcription start
PdWRKY13	TATA-box	ATATAT	1063	6	-	Brassica napus	core promoter element around -30 of transcription start
PdWRKY13	TATA-box	TATATA	1064	6	-	Arabidopsis thaliana	core promoter element around -30 of transcription start
PdWRKY13	TATA-box	ATATAT	1065	6	-	Brassica napus	core promoter element around -30 of transcription start
PdWRKY13	TATA-box	TATATA	1066	6	-	Arabidopsis thaliana	core promoter element around -30 of transcription start
PdWRKY13	TATA-box	ATATAT	1067	6	-	Brassica napus	core promoter element around -30 of transcription start
PdWRKY13	TATA-box	TATATA	1068	6	-	Arabidopsis thaliana	core promoter element around -30 of transcription start
PdWRKY13	TATA-box	ATATAT	1069	6	-	Brassica napus	core promoter element around -30 of transcription start
PdWRKY13	TATA-box	TATATA	1070	6	-	Arabidopsis thaliana	core promoter element around -30 of transcription start
PdWRKY13	TATA-box	TATA	1072	4	-	Arabidopsis thaliana	core promoter element around -30 of transcription start
PdWRKY13	TATA-box	TACAAAA	1177	7	-	Oryza sativa	core promoter element around -30 of transcription start
PdWRKY13	TATA-box	TACAAAA	1207	7	+	Oryza sativa	core promoter element around -30 of transcription start
PdWRKY13	TATA-box	TACAAAA	1296	7	-	Oryza sativa	core promoter element around -30 of transcription start
PdWRKY13	TATA-box	TACAAAA	1345	7	-	Oryza sativa	core promoter element around -30 of transcription start
PdWRKY13	TATA-box	TATATA	1477	6	-	Arabidopsis thaliana	core promoter element around -30 of transcription start
PdWRKY13	TATA-box	ATATAT	1478	6	-	Brassica napus	core promoter element around -30 of transcription start
PdWRKY13	TATA-box	TATATA	1479	6	-	Arabidopsis thaliana	core promoter element around -30 of transcription start
PdWRKY13	TATA-box	ATATAT	1480	6	-	Brassica napus	core promoter element around -30 of transcription start
PdWRKY13	TATA-box	TATATA	1481	6	-	Arabidopsis thaliana	core promoter element around -30 of transcription start
PdWRKY13	TATA-box	ATATAT	1482	6	-	Brassica napus	core promoter element around -30 of transcription start
PdWRKY13	TATA-box	TATATA	1483	6	-	Arabidopsis thaliana	core promoter element around -30 of transcription start
PdWRKY13	TATA-box	ATATAT	1484	6	-	Brassica napus	core promoter element around -30 of transcription start
PdWRKY13	TATA-box	TATATA	1485	6	-	Arabidopsis thaliana	core promoter element around -30 of transcription start
PdWRKY13	TATA-box	ATATAT	1486	6	-	Brassica napus	core promoter element around -30 of transcription start
PdWRKY13	TATA-box	TATATA	1487	6	-	Arabidopsis thaliana	core promoter element around -30 of transcription start
PdWRKY13	TATA-box	ATATAT	1488	6	-	Brassica napus	core promoter element around -30 of transcription start
PdWRKY13	TATA-box	TATATA	1489	6	-	Arabidopsis thaliana	core promoter element around -30 of transcription start
PdWRKY13	TATA-box	ATATAT	1490	6	-	Brassica napus	core promoter element around -30 of transcription start
PdWRKY13	TATA-box	TATATA	1491	6	-	Arabidopsis thaliana	core promoter element around -30 of transcription start
PdWRKY13	TATA-box	ATATAT	1492	6	-	Brassica napus	core promoter element around -30 of transcription start
PdWRKY13	TATA-box	TATATA	1493	6	-	Arabidopsis thaliana	core promoter element around -30 of transcription start
PdWRKY13	TATA-box	ATATAT	1494	6	-	Brassica napus	core promoter element around -30 of transcription start
PdWRKY13	TATA-box	TATATA	1495	6	-	Arabidopsis thaliana	core promoter element around -30 of transcription start
PdWRKY13	TATA-box	ATATAT	1496	6	-	Brassica napus	core promoter element around -30 of transcription start
PdWRKY13	TATA-box	TATATA	1497	6	-	Arabidopsis thaliana	core promoter element around -30 of transcription start
PdWRKY13	TATA-box	ATATAT	1498	6	-	Brassica napus	core promoter element around -30 of transcription start
PdWRKY13	TATA-box	TATATA	1499	6	-	Arabidopsis thaliana	core promoter element around -30 of transcription start
PdWRKY13	TATA-box	ATATAT	1500	6	-	Brassica napus	core promoter element around -30 of transcription start
PdWRKY13	TATA-box	TATATA	1501	6	-	Arabidopsis thaliana	core promoter element around -30 of transcription start
PdWRKY13	TATA-box	ATATAT	1502	6	-	Brassica napus	core promoter element around -30 of transcription start
PdWRKY13	TATA-box	TATA	1503	4	-	Arabidopsis thaliana	core promoter element around -30 of transcription start
PdWRKY13	TATA-box	TATA	1533	4	-	Arabidopsis thaliana	core promoter element around -30 of transcription start
PdWRKY13	TATA-box	ATATAT	1612	6	-	Brassica napus	core promoter element around -30 of transcription start
PdWRKY13	TATA-box	TATATA	1613	6	-	Arabidopsis thaliana	core promoter element around -30 of transcription start
PdWRKY13	TATA-box	ATATAT	1614	6	-	Brassica napus	core promoter element around -30 of transcription start
PdWRKY13	TATA-box	TATA	1615	4	-	Arabidopsis thaliana	core promoter element around -30 of transcription start
PdWRKY13	TATA-box	ATATAT	1637	6	-	Brassica napus	core promoter element around -30 of transcription start
PdWRKY13	TATA-box	TATATA	1638	6	-	Arabidopsis thaliana	core promoter element around -30 of transcription start
PdWRKY13	TATA-box	ATATAT	1639	6	-	Brassica napus	core promoter element around -30 of transcription start
PdWRKY13	TATA-box	TATATA	1640	6	-	Arabidopsis thaliana	core promoter element around -30 of transcription start
PdWRKY13	TATA-box	ATATAT	1641	6	-	Brassica napus	core promoter element around -30 of transcription start
PdWRKY13	TATA-box	TATATA	1642	6	-	Arabidopsis thaliana	core promoter element around -30 of transcription start
PdWRKY13	TATA-box	ATATAT	1643	6	-	Brassica napus	core promoter element around -30 of transcription start
PdWRKY13	TATA-box	TATATA	1644	6	-	Arabidopsis thaliana	core promoter element around -30 of transcription start
PdWRKY13	TATA-box	ATATAT	1645	6	-	Brassica napus	core promoter element around -30 of transcription start
PdWRKY13	TATA-box	TATATA	1646	6	-	Arabidopsis thaliana	core promoter element around -30 of transcription start
PdWRKY13	TATA-box	ATATAT	1647	6	-	Brassica napus	core promoter element around -30 of transcription start
PdWRKY13	TATA-box	TATATA	1648	6	-	Arabidopsis thaliana	core promoter element around -30 of transcription start
PdWRKY13	TATA-box	ATATAT	1649	6	-	Brassica napus	core promoter element around -30 of transcription start
PdWRKY13	TATA-box	TATATA	1650	6	-	Arabidopsis thaliana	core promoter element around -30 of transcription start
PdWRKY13	TATA-box	ATATAT	1651	6	-	Brassica napus	core promoter element around -30 of transcription start
PdWRKY13	TATA-box	TATA	1652	4	-	Arabidopsis thaliana	core promoter element around -30 of transcription start
PdWRKY13	TATA-box	TATAAATA	1992	8	-	Daucus carota	core promoter element around -30 of transcription start
PdWRKY13	TATA-box	TATAAAT	1993	7	-	Brassica juncea	core promoter element around -30 of transcription start
PdWRKY13	TATA-box	TATAAA	1994	6	-	Helianthus annuus	core promoter element around -30 of transcription start
PdWRKY13	TATA-box	TATAA	1995	5	-	Arabidopsis thaliana	core promoter element around -30 of transcription start
PdWRKY13	TATA-box	TATA	1996	4	-	Arabidopsis thaliana	core promoter element around -30 of transcription start
PdWRKY13	G-Box	CACGTT	559	6	+	Pisum sativum	cis-acting regulatory element involved in light responsiveness
PdWRKY13	G-Box	CACGTG	946	6	+	Pisum sativum	cis-acting regulatory element involved in light responsiveness
PdWRKY13	G-Box	CACGTT	989	6	-	Pisum sativum	cis-acting regulatory element involved in light responsiveness
PdWRKY13		motif_sequence	24	4	+	organism	short_function
PdWRKY13		motif_sequence	38	4	-	organism	short_function
PdWRKY13		motif_sequence	121	4	-	organism	short_function
PdWRKY13		motif_sequence	355	4	-	organism	short_function
PdWRKY13		motif_sequence	449	4	-	organism	short_function
PdWRKY13		motif_sequence	787	4	+	organism	short_function
PdWRKY13		motif_sequence	820	4	-	organism	short_function
PdWRKY13		motif_sequence	1181	4	-	organism	short_function
PdWRKY13		motif_sequence	1204	4	+	organism	short_function
PdWRKY13		motif_sequence	1601	4	+	organism	short_function
PdWRKY13		motif_sequence	1688	4	-	organism	short_function
PdWRKY13		motif_sequence	1745	4	+	organism	short_function
PdWRKY13		motif_sequence	1958	4	-	organism	short_function
PdWRKY13	ABRE	ACGTG	559	5	-	Arabidopsis thaliana	cis-acting element involved in the abscisic acid responsiveness
PdWRKY13	ABRE	CACGTG	946	6	+	Arabidopsis thaliana	cis-acting element involved in the abscisic acid responsiveness
PdWRKY13	ABRE	ACGTG	947	5	+	Arabidopsis thaliana	cis-acting element involved in the abscisic acid responsiveness
PdWRKY13	ABRE	GCAACGTGTC	987	9	+	Hordeum vulgare	cis-acting element involved in the abscisic acid responsiveness
PdWRKY13	ABRE	ACGTG	990	5	+	Arabidopsis thaliana	cis-acting element involved in the abscisic acid responsiveness
PdWRKY13	MYB	CAACCA	710	6	-	Arabidopsis thaliana
PdWRKY13	MYB	CAACAG	1722	6	-	Arabidopsis thaliana
PdWRKY13	MYB	CAACAG	1871	6	+	Arabidopsis thaliana
PdWRKY13	Myb-binding site	CAACAG	1722	6	-	Nicotiana tabacum
PdWRKY13	Myb-binding site	CAACAG	1871	6	+	Nicotiana tabacum
PdWRKY13	TCT-motif	TCTTAC	1300	6	-	Arabidopsis thaliana	part of a light responsive element
PdWRKY13	AT~TATA-box	TATATA	274	6	+	Arabidopsis thaliana
PdWRKY13	AT~TATA-box	TATATA	907	6	+	Arabidopsis thaliana
PdWRKY13	AT~TATA-box	TATATA	964	6	+	Arabidopsis thaliana
PdWRKY13	AT~TATA-box	TATATA	1058	6	-	Arabidopsis thaliana
PdWRKY13	AT~TATA-box	TATATA	1060	6	-	Arabidopsis thaliana
PdWRKY13	AT~TATA-box	TATATA	1062	6	-	Arabidopsis thaliana
PdWRKY13	AT~TATA-box	TATATA	1064	6	-	Arabidopsis thaliana
PdWRKY13	AT~TATA-box	TATATA	1066	6	-	Arabidopsis thaliana
PdWRKY13	AT~TATA-box	TATATA	1068	6	-	Arabidopsis thaliana
PdWRKY13	AT~TATA-box	TATATA	1070	6	-	Arabidopsis thaliana
PdWRKY13	AT~TATA-box	TATATA	1477	6	-	Arabidopsis thaliana
PdWRKY13	AT~TATA-box	TATATA	1479	6	-	Arabidopsis thaliana
PdWRKY13	AT~TATA-box	TATATA	1481	6	-	Arabidopsis thaliana
PdWRKY13	AT~TATA-box	TATATA	1483	6	-	Arabidopsis thaliana
PdWRKY13	AT~TATA-box	TATATA	1485	6	-	Arabidopsis thaliana
PdWRKY13	AT~TATA-box	TATATA	1487	6	-	Arabidopsis thaliana
PdWRKY13	AT~TATA-box	TATATA	1489	6	-	Arabidopsis thaliana
PdWRKY13	AT~TATA-box	TATATA	1491	6	-	Arabidopsis thaliana
PdWRKY13	AT~TATA-box	TATATA	1493	6	-	Arabidopsis thaliana
PdWRKY13	AT~TATA-box	TATATA	1495	6	-	Arabidopsis thaliana
PdWRKY13	AT~TATA-box	TATATA	1497	6	-	Arabidopsis thaliana
PdWRKY13	AT~TATA-box	TATATA	1499	6	-	Arabidopsis thaliana
PdWRKY13	AT~TATA-box	TATATA	1501	6	-	Arabidopsis thaliana
PdWRKY13	AT~TATA-box	TATATA	1613	6	-	Arabidopsis thaliana
PdWRKY13	AT~TATA-box	TATATA	1638	6	-	Arabidopsis thaliana
PdWRKY13	AT~TATA-box	TATATA	1640	6	-	Arabidopsis thaliana
PdWRKY13	AT~TATA-box	TATATA	1642	6	-	Arabidopsis thaliana
PdWRKY13	AT~TATA-box	TATATA	1644	6	-	Arabidopsis thaliana
PdWRKY13	AT~TATA-box	TATATA	1646	6	-	Arabidopsis thaliana
PdWRKY13	AT~TATA-box	TATATA	1648	6	-	Arabidopsis thaliana
PdWRKY13	AT~TATA-box	TATATA	1650	6	-	Arabidopsis thaliana
PdWRKY13	CAT-box	GCCACT	1711	6	-	Arabidopsis thaliana	cis-acting regulatory element related to meristem expression
PdWRKY13	chs-CMA2a	TCACTTGA	814	8	-	Petroselinum crispum	part of a light responsive element
PdWRKY13	chs-CMA2a	TCACTTGA	1216	8	+	Petroselinum crispum	part of a light responsive element
PdWRKY13	MYC	CAATTG	202	6	+	Arabidopsis thaliana
PdWRKY13	MYC	CATGTG	450	6	-	Arabidopsis thaliana
PdWRKY13	MYC	CATTTG	639	6	+	Arabidopsis thaliana
PdWRKY13	MYC	CATTTG	1233	6	+	Arabidopsis thaliana
PdWRKY13	MYC	CAATTG	1308	6	-	Arabidopsis thaliana
PdWRKY13	MYC	CATGTG	1557	6	+	Arabidopsis thaliana
PdWRKY13	ARE	AAACCA	405	6	+	Zea mays	cis-acting regulatory element essential for the anaerobic induction
PdWRKY13	ARE	AAACCA	1569	6	+	Zea mays	cis-acting regulatory element essential for the anaerobic induction
PdWRKY13	CGTCA-motif	CGTCA	1029	5	-	Hordeum vulgare	cis-acting regulatory element involved in the MeJA-responsiveness
PdWRKY13	CARE	CAACTCCC	626	8	+	Oryza sativa
PdWRKY14	G-box	CACGTG	66	6	+	Arabidopsis thaliana	cis-acting regulatory element involved in light responsiveness
PdWRKY14	G-box	CAGACGTGGCA	104	10	-	Nicotiana plumbaginifolia	cis-acting regulatory element involved in light responsiveness
PdWRKY14	G-box	CACGTC	107	6	+	Zea mays	cis-acting regulatory element involved in light responsiveness
PdWRKY14	G-box	CACGTC	315	6	-	Zea mays	cis-acting regulatory element involved in light responsiveness
PdWRKY14	G-box	TACGTG	1465	6	-	Arabidopsis thaliana	cis-acting regulatory element involved in light responsiveness
PdWRKY14	TCA-element	CCATCTTTTT	454	9	-	Nicotiana tabacum	cis-acting element involved in salicylic acid responsiveness
PdWRKY14	MBSI	TTTTTACGGTTA	951	11	+	Petunia hybrida	MYB binding site involved in flavonoid biosynthetic genes regulation
PdWRKY14	ABRE3a	TACGTG	1465	6	-	Zea mays
PdWRKY14	Unnamed__4	CTCC	166	4	+	Petroselinum hortense
PdWRKY14	Unnamed__4	CTCC	280	4	-	Petroselinum hortense
PdWRKY14	Unnamed__4	CTCC	320	4	-	Petroselinum hortense
PdWRKY14	Unnamed__4	CTCC	379	4	-	Petroselinum hortense
PdWRKY14	Unnamed__4	CTCC	386	4	-	Petroselinum hortense
PdWRKY14	Unnamed__4	CTCC	393	4	+	Petroselinum hortense
PdWRKY14	Unnamed__4	CTCC	420	4	-	Petroselinum hortense
PdWRKY14	Unnamed__4	CTCC	488	4	+	Petroselinum hortense
PdWRKY14	Unnamed__4	CTCC	737	4	+	Petroselinum hortense
PdWRKY14	Unnamed__4	CTCC	885	4	-	Petroselinum hortense
PdWRKY14	Unnamed__4	CTCC	1262	4	-	Petroselinum hortense
PdWRKY14	Unnamed__4	CTCC	1475	4	-	Petroselinum hortense
PdWRKY14	Unnamed__4	CTCC	1478	4	-	Petroselinum hortense
PdWRKY14	Unnamed__4	CTCC	1561	4	-	Petroselinum hortense
PdWRKY14	Unnamed__4	CTCC	1660	4	+	Petroselinum hortense
PdWRKY14	Unnamed__4	CTCC	1686	4	+	Petroselinum hortense
PdWRKY14	Unnamed__4	CTCC	1983	4	+	Petroselinum hortense
PdWRKY14	GA-motif	ATAGATAA	1650	8	-	Arabidopsis thaliana	part of a light responsive element
PdWRKY14	as-1	TGACG	109	5	-	Arabidopsis thaliana
PdWRKY14	as-1	TGACG	443	5	-	Arabidopsis thaliana
PdWRKY14	LTR	CCGAAA	1763	6	+	Hordeum vulgare	cis-acting element involved in low-temperature responsiveness
PdWRKY14	MBS	CAACTG	136	6	-	Arabidopsis thaliana	MYB binding site involved in drought-inducibility
PdWRKY14	AAGAA-motif	gGTAAAGAAA	1503	9	-	Avena sativa
PdWRKY14	chs-CMA1a	TTACTTAA	636	8	+	Daucus carota	part of a light responsive element
PdWRKY14	CAAT-box	CAAAT	12	5	-	Pisum sativum	common cis-acting element in promoter and enhancer regions
PdWRKY14	CAAT-box	CAAAT	21	5	-	Pisum sativum	common cis-acting element in promoter and enhancer regions
PdWRKY14	CAAT-box	CAAT	35	4	-	Nicotiana glutinosa
PdWRKY14	CAAT-box	CAAT	56	4	-	Nicotiana glutinosa
PdWRKY14	CAAT-box	CAAT	90	4	-	Nicotiana glutinosa
PdWRKY14	CAAT-box	CAAT	142	4	+	Nicotiana glutinosa
PdWRKY14	CAAT-box	CCAAT	255	5	-	Arabidopsis thaliana	common cis-acting element in promoter and enhancer regions
PdWRKY14	CAAT-box	CCAAT	521	5	+	Arabidopsis thaliana	common cis-acting element in promoter and enhancer regions
PdWRKY14	CAAT-box	CAAT	522	4	+	Nicotiana glutinosa
PdWRKY14	CAAT-box	CAAT	553	4	-	Nicotiana glutinosa
PdWRKY14	CAAT-box	CAAAT	566	5	+	Pisum sativum	common cis-acting element in promoter and enhancer regions
PdWRKY14	CAAT-box	CCAAT	572	5	-	Arabidopsis thaliana	common cis-acting element in promoter and enhancer regions
PdWRKY14	CAAT-box	CAAT	606	4	-	Nicotiana glutinosa
PdWRKY14	CAAT-box	CAAT	654	4	+	Nicotiana glutinosa
PdWRKY14	CAAT-box	CAAT	710	4	-	Nicotiana glutinosa
PdWRKY14	CAAT-box	CAAT	761	4	+	Nicotiana glutinosa
PdWRKY14	CAAT-box	CAAT	821	4	-	Nicotiana glutinosa
PdWRKY14	CAAT-box	CAAT	857	4	-	Nicotiana glutinosa
PdWRKY14	CAAT-box	CAAT	873	4	+	Nicotiana glutinosa
PdWRKY14	CAAT-box	CAAT	875	4	-	Nicotiana glutinosa
PdWRKY14	CAAT-box	CAAAT	891	5	-	Pisum sativum	common cis-acting element in promoter and enhancer regions
PdWRKY14	CAAT-box	CAAAT	902	5	-	Pisum sativum	common cis-acting element in promoter and enhancer regions
PdWRKY14	CAAT-box	CCAAT	911	5	+	Arabidopsis thaliana	common cis-acting element in promoter and enhancer regions
PdWRKY14	CAAT-box	CAAT	912	4	+	Nicotiana glutinosa
PdWRKY14	CAAT-box	CAAAT	920	5	+	Pisum sativum	common cis-acting element in promoter and enhancer regions
PdWRKY14	CAAT-box	CAAT	961	4	+	Nicotiana glutinosa
PdWRKY14	CAAT-box	CAAAT	989	5	+	Pisum sativum	common cis-acting element in promoter and enhancer regions
PdWRKY14	CAAT-box	CAAT	997	4	-	Nicotiana glutinosa
PdWRKY14	CAAT-box	CAAT	1006	4	+	Nicotiana glutinosa
PdWRKY14	CAAT-box	CAAT	1038	4	+	Nicotiana glutinosa
PdWRKY14	CAAT-box	CAAT	1042	4	-	Nicotiana glutinosa
PdWRKY14	CAAT-box	CCAAT	1055	5	-	Arabidopsis thaliana	common cis-acting element in promoter and enhancer regions
PdWRKY14	CAAT-box	CAAT	1093	4	-	Nicotiana glutinosa
PdWRKY14	CAAT-box	CAAT	1109	4	-	Nicotiana glutinosa
PdWRKY14	CAAT-box	CCAAT	1123	5	+	Arabidopsis thaliana	common cis-acting element in promoter and enhancer regions
PdWRKY14	CAAT-box	CAAT	1124	4	+	Nicotiana glutinosa
PdWRKY14	CAAT-box	CAAT	1135	4	+	Nicotiana glutinosa
PdWRKY14	CAAT-box	CAAT	1137	4	-	Nicotiana glutinosa
PdWRKY14	CAAT-box	CAAAT	1164	5	-	Pisum sativum	common cis-acting element in promoter and enhancer regions
PdWRKY14	CAAT-box	CAAAT	1223	5	+	Pisum sativum	common cis-acting element in promoter and enhancer regions
PdWRKY14	CAAT-box	CAAT	1253	4	+	Nicotiana glutinosa
PdWRKY14	CAAT-box	CCAAT	1259	5	-	Arabidopsis thaliana	common cis-acting element in promoter and enhancer regions
PdWRKY14	CAAT-box	CAAT	1271	4	-	Nicotiana glutinosa
PdWRKY14	CAAT-box	CCAAT	1297	5	-	Arabidopsis thaliana	common cis-acting element in promoter and enhancer regions
PdWRKY14	CAAT-box	CAAT	1336	4	+	Nicotiana glutinosa
PdWRKY14	CAAT-box	CAAT	1347	4	-	Nicotiana glutinosa
PdWRKY14	CAAT-box	CAAT	1372	4	-	Nicotiana glutinosa
PdWRKY14	CAAT-box	CAAT	1381	4	-	Nicotiana glutinosa
PdWRKY14	CAAT-box	CAAAT	1486	5	+	Pisum sativum	common cis-acting element in promoter and enhancer regions
PdWRKY14	CAAT-box	CAAT	1533	4	+	Nicotiana glutinosa
PdWRKY14	CAAT-box	CAAAT	1569	5	+	Pisum sativum	common cis-acting element in promoter and enhancer regions
PdWRKY14	CAAT-box	CAAAT	1740	5	-	Pisum sativum	common cis-acting element in promoter and enhancer regions
PdWRKY14	CAAT-box	CAAAT	1781	5	-	Pisum sativum	common cis-acting element in promoter and enhancer regions
PdWRKY14	CAAT-box	CAAT	1841	4	+	Nicotiana glutinosa
PdWRKY14	CAAT-box	CAAT	1965	4	-	Nicotiana glutinosa
PdWRKY14	P-box	CCTTTTG	490	7	+	Oryza sativa	gibberellin-responsive element
PdWRKY14	P-box	CCTTTTG	1662	7	+	Oryza sativa	gibberellin-responsive element
PdWRKY14	Box 4	ATTAAT	1392	6	-	Petroselinum crispum	part of a conserved DNA module involved in light responsiveness
PdWRKY14	STRE	AGGGG	163	5	-	Arabidopsis thaliana
PdWRKY14	STRE	AGGGG	1080	5	+	Arabidopsis thaliana
PdWRKY14	TC-rich repeats	GTTTTCTTAC	771	9	+	Nicotiana tabacum	cis-acting element involved in defense and stress responsiveness
PdWRKY14	W box	TTGACC	858	6	+	Arabidopsis thaliana
PdWRKY14	W box	TTGACC	958	6	-	Arabidopsis thaliana
PdWRKY14	TGACG-motif	TGACG	109	5	-	Hordeum vulgare	cis-acting regulatory element involved in the MeJA-responsiveness
PdWRKY14	TGACG-motif	TGACG	443	5	-	Hordeum vulgare	cis-acting regulatory element involved in the MeJA-responsiveness
PdWRKY14	GCN4_motif	TGAGTCA	720	7	+	Oryza sativa	cis-regulatory element involved in endosperm expression
PdWRKY14	GCN4_motif	TGAGTCA	1033	7	+	Oryza sativa	cis-regulatory element involved in endosperm expression
PdWRKY14	3-AF1 binding site	TAAGAGAGGAA	1978	10	-	Solanum tuberosum	light responsive element
PdWRKY14	CGTCA-motif	CGTCA	109	5	+	Hordeum vulgare	cis-acting regulatory element involved in the MeJA-responsiveness
PdWRKY14	CGTCA-motif	CGTCA	443	5	+	Hordeum vulgare	cis-acting regulatory element involved in the MeJA-responsiveness
PdWRKY14	Myc	TCTCTTA	773	7	+	Arabidopsis thaliana
PdWRKY14	ARE	AAACCA	879	6	-	Zea mays	cis-acting regulatory element essential for the anaerobic induction
PdWRKY14	ARE	AAACCA	1217	6	+	Zea mays	cis-acting regulatory element essential for the anaerobic induction
PdWRKY14	ARE	AAACCA	1299	6	-	Zea mays	cis-acting regulatory element essential for the anaerobic induction
PdWRKY14	ARE	AAACCA	1767	6	+	Zea mays	cis-acting regulatory element essential for the anaerobic induction
PdWRKY14	ARE	AAACCA	1888	6	+	Zea mays	cis-acting regulatory element essential for the anaerobic induction
PdWRKY14	MYC	CATGTG	356	6	+	Arabidopsis thaliana
PdWRKY14	MYC	CAATTG	873	6	+	Arabidopsis thaliana
PdWRKY14	MYC	CATTTG	920	6	-	Arabidopsis thaliana
PdWRKY14	MYC	CAATTG	1135	6	-	Arabidopsis thaliana
PdWRKY14	MYC	CATTTG	1739	6	+	Arabidopsis thaliana
PdWRKY14	MYC	CATTTG	1780	6	+	Arabidopsis thaliana
PdWRKY14	AT-rich element	ATAGAAATCAA	1094	10	-	Glycine max	binding site of AT-rich DNA binding protein (ATBP-1)
PdWRKY14	AT~TATA-box	TATATA	1956	6	-	Arabidopsis thaliana
PdWRKY14	AT~TATA-box	TATATA	1958	6	-	Arabidopsis thaliana
PdWRKY14	AT~TATA-box	TATATAAA	1969	8	-	Arabidopsis thaliana
PdWRKY14	AT~TATA-box	TATATA	1971	6	-	Arabidopsis thaliana
PdWRKY14	TCT-motif	TCTTAC	186	6	+	Arabidopsis thaliana	part of a light responsive element
PdWRKY14	TCT-motif	TCTTAC	775	6	+	Arabidopsis thaliana	part of a light responsive element
PdWRKY14	TCCC-motif	TCTCCCT	418	7	-	Spinacia oleracea	part of a light responsive element
PdWRKY14	ABRE4	CACGTA	1465	6	+	Zea mays
PdWRKY14	Unnamed__1	CGTGG	106	5	-	Zea mays
PdWRKY14	Unnamed__1	CGTGG	317	5	+	Zea mays
PdWRKY14	AE-box	AGAAACAA	432	8	+	Arabidopsis thaliana	part of a module for light response
PdWRKY14	Myb	CAACTG	136	6	-	Arabidopsis thaliana
PdWRKY14	Myb	TAACTG	1574	6	+	Arabidopsis thaliana
PdWRKY14	G-Box	CACGTG	66	6	+	Pisum sativum	cis-acting regulatory element involved in light responsiveness
PdWRKY14	ABRE	CACGTG	66	6	+	Arabidopsis thaliana	cis-acting element involved in the abscisic acid responsiveness
PdWRKY14	ABRE	ACGTG	67	5	+	Arabidopsis thaliana	cis-acting element involved in the abscisic acid responsiveness
PdWRKY14	ABRE	ACGTG	107	5	-	Arabidopsis thaliana	cis-acting element involved in the abscisic acid responsiveness
PdWRKY14	ABRE	ACGTG	316	5	+	Arabidopsis thaliana	cis-acting element involved in the abscisic acid responsiveness
PdWRKY14	ABRE	TACGGTC	955	7	+	Arabidopsis thaliana	cis-acting element involved in the abscisic acid responsiveness
PdWRKY14	ABRE	ACGTG	1465	5	-	Arabidopsis thaliana	cis-acting element involved in the abscisic acid responsiveness
PdWRKY14		motif_sequence	83	4	-	organism	short_function
PdWRKY14		motif_sequence	127	4	-	organism	short_function
PdWRKY14		motif_sequence	280	4	-	organism	short_function
PdWRKY14		motif_sequence	357	4	+	organism	short_function
PdWRKY14		motif_sequence	414	4	-	organism	short_function
PdWRKY14		motif_sequence	420	4	-	organism	short_function
PdWRKY14		motif_sequence	425	4	-	organism	short_function
PdWRKY14		motif_sequence	464	4	-	organism	short_function
PdWRKY14		motif_sequence	672	4	-	organism	short_function
PdWRKY14		motif_sequence	1825	4	+	organism	short_function
PdWRKY14		motif_sequence	1937	4	+	organism	short_function
PdWRKY14		motif_sequence	1981	4	+	organism	short_function
PdWRKY14	AT1-motif	AATTATTTTTTATT	1593	13	+	Solanum tuberosum	part of a light responsive module
PdWRKY14	AT1-motif	AATTATTTTTTATT	1630	13	-	Solanum tuberosum	part of a light responsive module
PdWRKY14	TATA-box	TATAA	7	5	-	Arabidopsis thaliana	core promoter element around -30 of transcription start
PdWRKY14	TATA-box	TATA	8	4	+	Arabidopsis thaliana	core promoter element around -30 of transcription start
PdWRKY14	TATA-box	TATA	32	4	+	Arabidopsis thaliana	core promoter element around -30 of transcription start
PdWRKY14	TATA-box	taTATAAAtc	71	9	-	Arabidopsis thaliana	core promoter element around -30 of transcription start
PdWRKY14	TATA-box	TATA	326	4	+	Arabidopsis thaliana	core promoter element around -30 of transcription start
PdWRKY14	TATA-box	TATA	498	4	+	Arabidopsis thaliana	core promoter element around -30 of transcription start
PdWRKY14	TATA-box	ATTATA	714	6	+	Brassica napus	core promoter element around -30 of transcription start
PdWRKY14	TATA-box	TATAA	715	5	-	Arabidopsis thaliana	core promoter element around -30 of transcription start
PdWRKY14	TATA-box	TATA	716	4	+	Arabidopsis thaliana	core promoter element around -30 of transcription start
PdWRKY14	TATA-box	ATTATA	1070	6	+	Brassica napus	core promoter element around -30 of transcription start
PdWRKY14	TATA-box	TATAA	1071	5	-	Arabidopsis thaliana	core promoter element around -30 of transcription start
PdWRKY14	TATA-box	TATA	1072	4	-	Arabidopsis thaliana	core promoter element around -30 of transcription start
PdWRKY14	TATA-box	taTATAAAtc	1096	9	-	Arabidopsis thaliana	core promoter element around -30 of transcription start
PdWRKY14	TATA-box	TATAAAT	1097	7	-	Brassica juncea	core promoter element around -30 of transcription start
PdWRKY14	TATA-box	TATAAA	1098	6	-	Helianthus annuus	core promoter element around -30 of transcription start
PdWRKY14	TATA-box	TATAA	1099	5	-	Arabidopsis thaliana	core promoter element around -30 of transcription start
PdWRKY14	TATA-box	TATA	1100	4	-	Arabidopsis thaliana	core promoter element around -30 of transcription start
PdWRKY14	TATA-box	TACAAAA	1496	7	-	Oryza sativa	core promoter element around -30 of transcription start
PdWRKY14	TATA-box	ATTATA	1614	6	+	Brassica napus	core promoter element around -30 of transcription start
PdWRKY14	TATA-box	TATAA	1615	5	-	Arabidopsis thaliana	core promoter element around -30 of transcription start
PdWRKY14	TATA-box	TATA	1616	4	-	Arabidopsis thaliana	core promoter element around -30 of transcription start
PdWRKY14	TATA-box	TATA	1673	4	-	Arabidopsis thaliana	core promoter element around -30 of transcription start
PdWRKY14	TATA-box	TATA	1696	4	-	Arabidopsis thaliana	core promoter element around -30 of transcription start
PdWRKY14	TATA-box	TATATA	1956	6	-	Arabidopsis thaliana	core promoter element around -30 of transcription start
PdWRKY14	TATA-box	ATATAT	1957	6	-	Brassica napus	core promoter element around -30 of transcription start
PdWRKY14	TATA-box	TATATA	1958	6	-	Arabidopsis thaliana	core promoter element around -30 of transcription start
PdWRKY14	TATA-box	TATA	1960	4	-	Arabidopsis thaliana	core promoter element around -30 of transcription start
PdWRKY14	TATA-box	TATAAA	1969	6	-	Helianthus annuus	core promoter element around -30 of transcription start
PdWRKY14	TATA-box	TATATAA	1970	7	-	Arabidopsis thaliana	core promoter element around -30 of transcription start
PdWRKY14	TATA-box	TATATA	1971	6	-	Arabidopsis thaliana	core promoter element around -30 of transcription start
PdWRKY14	TATA-box	ATATAA	1972	6	+	Brassica oleracea	core promoter element around -30 of transcription start
PdWRKY14	TATA-box	TATA	1973	4	-	Arabidopsis thaliana	core promoter element around -30 of transcription start
PdWRKY15	as-1	TGACG	410	5	-	Arabidopsis thaliana
PdWRKY15	as-1	TGACG	420	5	+	Arabidopsis thaliana
PdWRKY15	as-1	TGACG	1945	5	+	Arabidopsis thaliana
PdWRKY15	MBS	CAACTG	876	6	+	Arabidopsis thaliana	MYB binding site involved in drought-inducibility
PdWRKY15	G-box	CACGTG	1941	6	-	Arabidopsis thaliana	cis-acting regulatory element involved in light responsiveness
PdWRKY15	Gap-box	CAAATGAA(A/G)A	115	9.5	-	Arabidopsis thaliana	part of a light responsive element
PdWRKY15	Unnamed__6	taTAAATATct	1692	10	-	Zea mays
PdWRKY15	Unnamed__4	CTCC	269	4	-	Petroselinum hortense
PdWRKY15	Unnamed__4	CTCC	440	4	-	Petroselinum hortense
PdWRKY15	Unnamed__4	CTCC	474	4	-	Petroselinum hortense
PdWRKY15	Unnamed__4	CTCC	632	4	-	Petroselinum hortense
PdWRKY15	Unnamed__4	CTCC	800	4	+	Petroselinum hortense
PdWRKY15	Unnamed__4	CTCC	900	4	-	Petroselinum hortense
PdWRKY15	Unnamed__4	CTCC	1151	4	-	Petroselinum hortense
PdWRKY15	Unnamed__4	CTCC	1314	4	+	Petroselinum hortense
PdWRKY15	Unnamed__4	CTCC	1541	4	-	Petroselinum hortense
PdWRKY15	Unnamed__4	CTCC	1578	4	+	Petroselinum hortense
PdWRKY15	STRE	AGGGG	564	5	+	Arabidopsis thaliana
PdWRKY15	W box	TTGACC	940	6	+	Arabidopsis thaliana
PdWRKY15	TGACG-motif	TGACG	410	5	-	Hordeum vulgare	cis-acting regulatory element involved in the MeJA-responsiveness
PdWRKY15	TGACG-motif	TGACG	420	5	+	Hordeum vulgare	cis-acting regulatory element involved in the MeJA-responsiveness
PdWRKY15	TGACG-motif	TGACG	1945	5	+	Hordeum vulgare	cis-acting regulatory element involved in the MeJA-responsiveness
PdWRKY15	TCA	TCATCTTCAT	30	9	+	Pisum sativum
PdWRKY15	ACE	CTAACGTATT	1115	9	+	Petroselinum crispum	cis-acting element involved in light responsiveness
PdWRKY15	WUN-motif	AAATTACT	1543	8	-	Nicotiana glutinosa
PdWRKY15	AAGAA-motif	GAAAGAA	1190	7	+	Avena sativa
PdWRKY15	AAGAA-motif	gGTAAAGAAA	1362	10	-	Avena sativa
PdWRKY15	AAGAA-motif	GAAAGAA	1758	7	+	Avena sativa
PdWRKY15	GATA-motif	AAGGATAAGG	193	9	+	Solanum tuberosum	part of a light responsive element
PdWRKY15	CAAT-box	CAAAT	14	5	+	Pisum sativum	common cis-acting element in promoter and enhancer regions
PdWRKY15	CAAT-box	CAAT	61	4	-	Nicotiana glutinosa
PdWRKY15	CAAT-box	CAAAT	120	5	-	Pisum sativum	common cis-acting element in promoter and enhancer regions
PdWRKY15	CAAT-box	CAAAT	148	5	-	Pisum sativum	common cis-acting element in promoter and enhancer regions
PdWRKY15	CAAT-box	CAAT	160	4	-	Nicotiana glutinosa
PdWRKY15	CAAT-box	CAAAT	217	5	+	Pisum sativum	common cis-acting element in promoter and enhancer regions
PdWRKY15	CAAT-box	CAAAT	220	5	-	Pisum sativum	common cis-acting element in promoter and enhancer regions
PdWRKY15	CAAT-box	CAAT	300	4	+	Nicotiana glutinosa
PdWRKY15	CAAT-box	CCAAT	328	5	+	Arabidopsis thaliana	common cis-acting element in promoter and enhancer regions
PdWRKY15	CAAT-box	CAAT	329	4	+	Nicotiana glutinosa
PdWRKY15	CAAT-box	CAAT	498	4	+	Nicotiana glutinosa
PdWRKY15	CAAT-box	CCAAT	556	5	+	Arabidopsis thaliana	common cis-acting element in promoter and enhancer regions
PdWRKY15	CAAT-box	CAAT	557	4	+	Nicotiana glutinosa
PdWRKY15	CAAT-box	CCAAT	582	5	-	Arabidopsis thaliana	common cis-acting element in promoter and enhancer regions
PdWRKY15	CAAT-box	CCAAT	629	5	-	Arabidopsis thaliana	common cis-acting element in promoter and enhancer regions
PdWRKY15	CAAT-box	CCAAT	777	5	-	Arabidopsis thaliana	common cis-acting element in promoter and enhancer regions
PdWRKY15	CAAT-box	CCAAT	794	5	-	Arabidopsis thaliana	common cis-acting element in promoter and enhancer regions
PdWRKY15	CAAT-box	TGCAAATCT	888	9	-	Brassica juncea	common cis-acting element in promoter and enhancer regions
PdWRKY15	CAAT-box	CAAAT	890	5	-	Pisum sativum	common cis-acting element in promoter and enhancer regions
PdWRKY15	CAAT-box	CAAT	1007	4	-	Nicotiana glutinosa
PdWRKY15	CAAT-box	CAAAT	1169	5	-	Pisum sativum	common cis-acting element in promoter and enhancer regions
PdWRKY15	CAAT-box	CAAT	1240	4	-	Nicotiana glutinosa
PdWRKY15	CAAT-box	CCAAT	1282	5	-	Arabidopsis thaliana	common cis-acting element in promoter and enhancer regions
PdWRKY15	CAAT-box	CAAT	1308	4	+	Nicotiana glutinosa
PdWRKY15	CAAT-box	CAAAT	1331	5	+	Pisum sativum	common cis-acting element in promoter and enhancer regions
PdWRKY15	CAAT-box	CAAT	1334	4	-	Nicotiana glutinosa
PdWRKY15	CAAT-box	CCAAT	1348	5	-	Arabidopsis thaliana	common cis-acting element in promoter and enhancer regions
PdWRKY15	CAAT-box	CAAAT	1377	5	-	Pisum sativum	common cis-acting element in promoter and enhancer regions
PdWRKY15	CAAT-box	CAAAT	1485	5	+	Pisum sativum	common cis-acting element in promoter and enhancer regions
PdWRKY15	CAAT-box	CAAT	1495	4	-	Nicotiana glutinosa
PdWRKY15	CAAT-box	CAAT	1509	4	-	Nicotiana glutinosa
PdWRKY15	CAAT-box	CAAT	1520	4	+	Nicotiana glutinosa
PdWRKY15	CAAT-box	CAAAT	1531	5	-	Pisum sativum	common cis-acting element in promoter and enhancer regions
PdWRKY15	CAAT-box	CAAAT	1537	5	-	Pisum sativum	common cis-acting element in promoter and enhancer regions
PdWRKY15	CAAT-box	CAAT	1597	4	+	Nicotiana glutinosa
PdWRKY15	CAAT-box	CCAAT	1649	5	+	Arabidopsis thaliana	common cis-acting element in promoter and enhancer regions
PdWRKY15	CAAT-box	CAAT	1650	4	+	Nicotiana glutinosa
PdWRKY15	CAAT-box	CAAT	1696	4	-	Nicotiana glutinosa
PdWRKY15	CAAT-box	CAAAT	1726	5	-	Pisum sativum	common cis-acting element in promoter and enhancer regions
PdWRKY15	CAAT-box	CAAT	1824	4	+	Nicotiana glutinosa
PdWRKY15	CAAT-box	CAAAT	1908	5	+	Pisum sativum	common cis-acting element in promoter and enhancer regions
PdWRKY15	CAAT-box	CAAT	1932	4	+	Nicotiana glutinosa
PdWRKY15	CAAT-box	CAAAT	1934	5	-	Pisum sativum	common cis-acting element in promoter and enhancer regions
PdWRKY15	CAAT-box	CCAAT	1962	5	+	Arabidopsis thaliana	common cis-acting element in promoter and enhancer regions
PdWRKY15	CAAT-box	CAAT	1963	4	+	Nicotiana glutinosa
PdWRKY15	MYC	CATTTG	119	6	+	Arabidopsis thaliana
PdWRKY15	MYC	CATGTG	416	6	+	Arabidopsis thaliana
PdWRKY15	MYC	CATTTG	1168	6	+	Arabidopsis thaliana
PdWRKY15	MYC	CATTTG	1536	6	+	Arabidopsis thaliana
PdWRKY15	MYB-like sequence	TAACCA	123	6	-	Arabidopsis thaliana
PdWRKY15	AT~TATA-box	TATATAAA	368	8	-	Arabidopsis thaliana
PdWRKY15	AT~TATA-box	TATATA	370	6	+	Arabidopsis thaliana
PdWRKY15	AT~TATA-box	TATATA	386	6	+	Arabidopsis thaliana
PdWRKY15	AT~TATA-box	TATATA	461	6	+	Arabidopsis thaliana
PdWRKY15	AT~TATA-box	TATATA	1442	6	-	Arabidopsis thaliana
PdWRKY15	AT~TATA-box	TATATA	1444	6	-	Arabidopsis thaliana
PdWRKY15	AT~TATA-box	TATATA	1513	6	-	Arabidopsis thaliana
PdWRKY15	AT~TATA-box	TATATA	1669	6	-	Arabidopsis thaliana
PdWRKY15	AT~TATA-box	TATATA	1671	6	-	Arabidopsis thaliana
PdWRKY15	AT~TATA-box	TATATA	1673	6	-	Arabidopsis thaliana
PdWRKY15	AT~TATA-box	TATATA	1803	6	-	Arabidopsis thaliana
PdWRKY15	AT~TATA-box	TATATA	1894	6	-	Arabidopsis thaliana
PdWRKY15	CGTCA-motif	CGTCA	410	5	+	Hordeum vulgare	cis-acting regulatory element involved in the MeJA-responsiveness
PdWRKY15	CGTCA-motif	CGTCA	420	5	-	Hordeum vulgare	cis-acting regulatory element involved in the MeJA-responsiveness
PdWRKY15	CGTCA-motif	CGTCA	1945	5	-	Hordeum vulgare	cis-acting regulatory element involved in the MeJA-responsiveness
PdWRKY15	Sp1	GGGCGG	201	6	+	Oryza sativa	light responsive element
PdWRKY15	ARE	AAACCA	1350	6	-	Zea mays	cis-acting regulatory element essential for the anaerobic induction
PdWRKY15	ARE	AAACCA	1915	6	+	Zea mays	cis-acting regulatory element essential for the anaerobic induction
PdWRKY15	TCCC-motif	TCTCCCT	1577	7	+	Spinacia oleracea	part of a light responsive element
PdWRKY15	AP-1	TGAGTTAG	1497	8	+	Arabidopsis thaliana
PdWRKY15	Myb	CAACTG	876	6	+	Arabidopsis thaliana
PdWRKY15	Myb	TAACTG	1627	6	-	Arabidopsis thaliana
PdWRKY15	MYB	TAACCA	123	6	-	Arabidopsis thaliana
PdWRKY15	MYB	CAACAG	1019	6	-	Arabidopsis thaliana
PdWRKY15	MYB	CAACCA	1875	6	-	Arabidopsis thaliana
PdWRKY15	AE-box	AGAAACTT	1356	8	+	Arabidopsis thaliana	part of a module for light response
PdWRKY15	ABRE	TACGGTC	942	7	-	Arabidopsis thaliana	cis-acting element involved in the abscisic acid responsiveness
PdWRKY15	ABRE	CACGTG	1941	6	-	Arabidopsis thaliana	cis-acting element involved in the abscisic acid responsiveness
PdWRKY15	ABRE	ACGTG	1942	5	+	Arabidopsis thaliana	cis-acting element involved in the abscisic acid responsiveness
PdWRKY15	G-Box	CACGTG	1941	6	-	Pisum sativum	cis-acting regulatory element involved in light responsiveness
PdWRKY15		motif_sequence	29	4	+	organism	short_function
PdWRKY15		motif_sequence	79	4	+	organism	short_function
PdWRKY15		motif_sequence	93	4	+	organism	short_function
PdWRKY15		motif_sequence	269	4	-	organism	short_function
PdWRKY15		motif_sequence	318	4	+	organism	short_function
PdWRKY15		motif_sequence	455	4	-	organism	short_function
PdWRKY15		motif_sequence	474	4	-	organism	short_function
PdWRKY15		motif_sequence	489	4	+	organism	short_function
PdWRKY15		motif_sequence	591	4	-	organism	short_function
PdWRKY15		motif_sequence	708	4	-	organism	short_function
PdWRKY15		motif_sequence	862	4	+	organism	short_function
PdWRKY15		motif_sequence	900	4	-	organism	short_function
PdWRKY15		motif_sequence	1264	4	+	organism	short_function
PdWRKY15		motif_sequence	1586	4	-	organism	short_function
PdWRKY15		motif_sequence	1624	4	-	organism	short_function
PdWRKY15		motif_sequence	1762	4	-	organism	short_function
PdWRKY15	TATA-box	TATA	47	4	+	Arabidopsis thaliana	core promoter element around -30 of transcription start
PdWRKY15	TATA-box	TATA	66	4	+	Arabidopsis thaliana	core promoter element around -30 of transcription start
PdWRKY15	TATA-box	TATA	90	4	+	Arabidopsis thaliana	core promoter element around -30 of transcription start
PdWRKY15	TATA-box	ATTATA	331	6	+	Brassica napus	core promoter element around -30 of transcription start
PdWRKY15	TATA-box	TATAA	332	5	-	Arabidopsis thaliana	core promoter element around -30 of transcription start
PdWRKY15	TATA-box	TATA	333	4	+	Arabidopsis thaliana	core promoter element around -30 of transcription start
PdWRKY15	TATA-box	taTATAAAtc	366	9	-	Arabidopsis thaliana	core promoter element around -30 of transcription start
PdWRKY15	TATA-box	TATAAAT	367	7	-	Brassica juncea	core promoter element around -30 of transcription start
PdWRKY15	TATA-box	TATAAA	368	6	-	Helianthus annuus	core promoter element around -30 of transcription start
PdWRKY15	TATA-box	TATATAA	369	7	-	Arabidopsis thaliana	core promoter element around -30 of transcription start
PdWRKY15	TATA-box	TATATA	370	6	+	Arabidopsis thaliana	core promoter element around -30 of transcription start
PdWRKY15	TATA-box	ATATAT	371	6	+	Brassica napus	core promoter element around -30 of transcription start
PdWRKY15	TATA-box	TATA	372	4	+	Arabidopsis thaliana	core promoter element around -30 of transcription start
PdWRKY15	TATA-box	TATATA	386	6	+	Arabidopsis thaliana	core promoter element around -30 of transcription start
PdWRKY15	TATA-box	ATATAT	387	6	+	Brassica napus	core promoter element around -30 of transcription start
PdWRKY15	TATA-box	TATA	388	4	+	Arabidopsis thaliana	core promoter element around -30 of transcription start
PdWRKY15	TATA-box	TATA	425	4	+	Arabidopsis thaliana	core promoter element around -30 of transcription start
PdWRKY15	TATA-box	TATATA	461	6	+	Arabidopsis thaliana	core promoter element around -30 of transcription start
PdWRKY15	TATA-box	TATA	463	4	+	Arabidopsis thaliana	core promoter element around -30 of transcription start
PdWRKY15	TATA-box	TATA	524	4	+	Arabidopsis thaliana	core promoter element around -30 of transcription start
PdWRKY15	TATA-box	TATA	542	4	+	Arabidopsis thaliana	core promoter element around -30 of transcription start
PdWRKY15	TATA-box	ATATAT	773	6	+	Brassica napus	core promoter element around -30 of transcription start
PdWRKY15	TATA-box	TATA	774	4	+	Arabidopsis thaliana	core promoter element around -30 of transcription start
PdWRKY15	TATA-box	TATA	806	4	+	Arabidopsis thaliana	core promoter element around -30 of transcription start
PdWRKY15	TATA-box	TATAAA	848	6	-	Helianthus annuus	core promoter element around -30 of transcription start
PdWRKY15	TATA-box	TATAA	849	5	-	Arabidopsis thaliana	core promoter element around -30 of transcription start
PdWRKY15	TATA-box	TATA	850	4	+	Arabidopsis thaliana	core promoter element around -30 of transcription start
PdWRKY15	TATA-box	TATACA	1343	6	-	Helianthus annuus	core promoter element around -30 of transcription start
PdWRKY15	TATA-box	TATA	1345	4	-	Arabidopsis thaliana	core promoter element around -30 of transcription start
PdWRKY15	TATA-box	TATA	1398	4	-	Arabidopsis thaliana	core promoter element around -30 of transcription start
PdWRKY15	TATA-box	TATA	1418	4	-	Arabidopsis thaliana	core promoter element around -30 of transcription start
PdWRKY15	TATA-box	TATA	1434	4	-	Arabidopsis thaliana	core promoter element around -30 of transcription start
PdWRKY15	TATA-box	TATATA	1442	6	-	Arabidopsis thaliana	core promoter element around -30 of transcription start
PdWRKY15	TATA-box	ATATAT	1443	6	-	Brassica napus	core promoter element around -30 of transcription start
PdWRKY15	TATA-box	TATATA	1444	6	-	Arabidopsis thaliana	core promoter element around -30 of transcription start
PdWRKY15	TATA-box	ATATAA	1445	6	+	Brassica oleracea	core promoter element around -30 of transcription start
PdWRKY15	TATA-box	TATA	1446	4	-	Arabidopsis thaliana	core promoter element around -30 of transcription start
PdWRKY15	TATA-box	ATATAA	1453	6	+	Brassica oleracea	core promoter element around -30 of transcription start
PdWRKY15	TATA-box	TATA	1454	4	-	Arabidopsis thaliana	core promoter element around -30 of transcription start
PdWRKY15	TATA-box	TATACA	1511	6	-	Helianthus annuus	core promoter element around -30 of transcription start
PdWRKY15	TATA-box	TATATA	1513	6	-	Arabidopsis thaliana	core promoter element around -30 of transcription start
PdWRKY15	TATA-box	ATATAT	1514	6	-	Brassica napus	core promoter element around -30 of transcription start
PdWRKY15	TATA-box	TATA	1515	4	-	Arabidopsis thaliana	core promoter element around -30 of transcription start
PdWRKY15	TATA-box	TATA	1523	4	-	Arabidopsis thaliana	core promoter element around -30 of transcription start
PdWRKY15	TATA-box	ATATAT	1590	6	-	Brassica napus	core promoter element around -30 of transcription start
PdWRKY15	TATA-box	TATA	1591	4	-	Arabidopsis thaliana	core promoter element around -30 of transcription start
PdWRKY15	TATA-box	TATACA	1667	6	-	Helianthus annuus	core promoter element around -30 of transcription start
PdWRKY15	TATA-box	TATATA	1669	6	-	Arabidopsis thaliana	core promoter element around -30 of transcription start
PdWRKY15	TATA-box	ATATAT	1670	6	-	Brassica napus	core promoter element around -30 of transcription start
PdWRKY15	TATA-box	TATATA	1671	6	-	Arabidopsis thaliana	core promoter element around -30 of transcription start
PdWRKY15	TATA-box	ATATAT	1672	6	-	Brassica napus	core promoter element around -30 of transcription start
PdWRKY15	TATA-box	TATATA	1673	6	-	Arabidopsis thaliana	core promoter element around -30 of transcription start
PdWRKY15	TATA-box	ATATAA	1674	6	+	Brassica oleracea	core promoter element around -30 of transcription start
PdWRKY15	TATA-box	TATA	1675	4	-	Arabidopsis thaliana	core promoter element around -30 of transcription start
PdWRKY15	TATA-box	TATATA	1803	6	-	Arabidopsis thaliana	core promoter element around -30 of transcription start
PdWRKY15	TATA-box	TATA	1805	4	-	Arabidopsis thaliana	core promoter element around -30 of transcription start
PdWRKY15	TATA-box	TATATA	1894	6	-	Arabidopsis thaliana	core promoter element around -30 of transcription start
PdWRKY15	TATA-box	ATATAT	1895	6	-	Brassica napus	core promoter element around -30 of transcription start
PdWRKY15	TATA-box	TATA	1896	4	-	Arabidopsis thaliana	core promoter element around -30 of transcription start
PdWRKY15	TATA-box	TACAAAA	1924	7	-	Oryza sativa	core promoter element around -30 of transcription start
PdWRKY15	TATA-box	TATACA	1952	6	-	Helianthus annuus	core promoter element around -30 of transcription start
PdWRKY15	TATA-box	TATA	1954	4	-	Arabidopsis thaliana	core promoter element around -30 of transcription start
PdWRKY15	Myb-binding site	CAACAG	1019	6	-	Nicotiana tabacum
PdWRKY16	TGACG-motif	TGACG	44	5	+	Hordeum vulgare	cis-acting regulatory element involved in the MeJA-responsiveness
PdWRKY16	TGACG-motif	TGACG	653	5	+	Hordeum vulgare	cis-acting regulatory element involved in the MeJA-responsiveness
PdWRKY16	TGACG-motif	TGACG	1589	5	-	Hordeum vulgare	cis-acting regulatory element involved in the MeJA-responsiveness
PdWRKY16	TC-rich repeats	ATTCTCTAAC	857	9	-	Nicotiana tabacum	cis-acting element involved in defense and stress responsiveness
PdWRKY16	TC-rich repeats	ATTCTCTAAC	1356	9	-	Nicotiana tabacum	cis-acting element involved in defense and stress responsiveness
PdWRKY16	TC-rich repeats	GTTTTCTTAC	1860	9	-	Nicotiana tabacum	cis-acting element involved in defense and stress responsiveness
PdWRKY16	Box 4	ATTAAT	1889	6	-	Petroselinum crispum	part of a conserved DNA module involved in light responsiveness
PdWRKY16	CCGTCC motif	CCGTCC	545	6	-	Nicotiana tabacum
PdWRKY16	AAGAA-motif	gGTAAAGAAA	82	9	-	Avena sativa
PdWRKY16	AAGAA-motif	GAAAGAA	514	7	-	Avena sativa
PdWRKY16	AAGAA-motif	GAAAGAA	1819	7	+	Avena sativa
PdWRKY16	TGA-element	AACGAC	1203	6	+	Brassica oleracea	auxin-responsive element
PdWRKY16	CAAT-box	CAAT	66	4	+	Nicotiana glutinosa
PdWRKY16	CAAT-box	CAAAT	186	5	+	Pisum sativum	common cis-acting element in promoter and enhancer regions
PdWRKY16	CAAT-box	CAAT	192	4	-	Nicotiana glutinosa
PdWRKY16	CAAT-box	CAAT	243	4	+	Nicotiana glutinosa
PdWRKY16	CAAT-box	CAAT	270	4	+	Nicotiana glutinosa
PdWRKY16	CAAT-box	CAAAT	281	5	+	Pisum sativum	common cis-acting element in promoter and enhancer regions
PdWRKY16	CAAT-box	CAAAT	313	5	-	Pisum sativum	common cis-acting element in promoter and enhancer regions
PdWRKY16	CAAT-box	CAAT	439	4	+	Nicotiana glutinosa
PdWRKY16	CAAT-box	CAAT	526	4	+	Nicotiana glutinosa
PdWRKY16	CAAT-box	CAAAT	528	5	-	Pisum sativum	common cis-acting element in promoter and enhancer regions
PdWRKY16	CAAT-box	CCAAT	663	5	-	Arabidopsis thaliana	common cis-acting element in promoter and enhancer regions
PdWRKY16	CAAT-box	CAAT	687	4	+	Nicotiana glutinosa
PdWRKY16	CAAT-box	CAAT	770	4	-	Nicotiana glutinosa
PdWRKY16	CAAT-box	CAAAT	1079	5	+	Pisum sativum	common cis-acting element in promoter and enhancer regions
PdWRKY16	CAAT-box	CAAAT	1110	5	-	Pisum sativum	common cis-acting element in promoter and enhancer regions
PdWRKY16	CAAT-box	CAAT	1160	4	-	Nicotiana glutinosa
PdWRKY16	CAAT-box	CAAT	1222	4	+	Nicotiana glutinosa
PdWRKY16	CAAT-box	CAAAT	1247	5	-	Pisum sativum	common cis-acting element in promoter and enhancer regions
PdWRKY16	CAAT-box	CAAAT	1274	5	-	Pisum sativum	common cis-acting element in promoter and enhancer regions
PdWRKY16	CAAT-box	CCAAT	1320	5	-	Arabidopsis thaliana	common cis-acting element in promoter and enhancer regions
PdWRKY16	CAAT-box	CAAT	1398	4	+	Nicotiana glutinosa
PdWRKY16	CAAT-box	CCAAT	1418	5	+	Arabidopsis thaliana	common cis-acting element in promoter and enhancer regions
PdWRKY16	CAAT-box	CAAT	1419	4	+	Nicotiana glutinosa
PdWRKY16	CAAT-box	CAAAT	1439	5	-	Pisum sativum	common cis-acting element in promoter and enhancer regions
PdWRKY16	CAAT-box	CCAAT	1730	5	+	Arabidopsis thaliana	common cis-acting element in promoter and enhancer regions
PdWRKY16	CAAT-box	CAAT	1731	4	+	Nicotiana glutinosa
PdWRKY16	CAAT-box	CAAT	1745	4	-	Nicotiana glutinosa
PdWRKY16	CAAT-box	CAAT	1765	4	+	Nicotiana glutinosa
PdWRKY16	CAAT-box	CAAT	1779	4	-	Nicotiana glutinosa
PdWRKY16	CAAT-box	CAAT	1801	4	-	Nicotiana glutinosa
PdWRKY16	CAAT-box	CAAT	1834	4	+	Nicotiana glutinosa
PdWRKY16	CAAT-box	CAAT	1874	4	-	Nicotiana glutinosa
PdWRKY16	A-box	CCGTCC	545	6	-	Petroselinum crispum	cis-acting regulatory element
PdWRKY16	TGA-box	TGACGTAA	1586	8	-	Glycine max	part of an auxin-responsive element
PdWRKY16	as-1	TGACG	44	5	+	Arabidopsis thaliana
PdWRKY16	as-1	TGACG	653	5	+	Arabidopsis thaliana
PdWRKY16	as-1	TGACG	1589	5	-	Arabidopsis thaliana
PdWRKY16	GA-motif	ATAGATAA	450	8	+	Arabidopsis thaliana	part of a light responsive element
PdWRKY16	GA-motif	ATAGATAA	1548	8	-	Arabidopsis thaliana	part of a light responsive element
PdWRKY16	LTR	CCGAAA	484	6	+	Hordeum vulgare	cis-acting element involved in low-temperature responsiveness
PdWRKY16	G-box	CACGTC	654	6	-	Zea mays	cis-acting regulatory element involved in light responsiveness
PdWRKY16	Unnamed__4	CTCC	70	4	+	Petroselinum hortense
PdWRKY16	Unnamed__4	CTCC	234	4	-	Petroselinum hortense
PdWRKY16	Unnamed__4	CTCC	327	4	-	Petroselinum hortense
PdWRKY16	Unnamed__4	CTCC	1323	4	-	Petroselinum hortense
PdWRKY16	Unnamed__4	CTCC	1365	4	+	Petroselinum hortense
PdWRKY16	Unnamed__4	CTCC	1535	4	+	Petroselinum hortense
PdWRKY16	Unnamed__4	CTCC	1543	4	+	Petroselinum hortense
PdWRKY16	Unnamed__4	CTCC	1614	4	+	Petroselinum hortense
PdWRKY16	Unnamed__4	CTCC	1930	4	+	Petroselinum hortense
PdWRKY16	ERE	ATTTTAAA	689	8	+	Nicotiana glutinos
PdWRKY16	ERE	ATTTTAAA	1252	8	+	Nicotiana glutinos
PdWRKY16	MYB	TAACCA	830	6	-	Arabidopsis thaliana
PdWRKY16	Myb	TAACTG	1350	6	-	Arabidopsis thaliana
PdWRKY16	Myb	TAACTG	1709	6	-	Arabidopsis thaliana
PdWRKY16	TCCC-motif	TCTCCCT	1613	7	+	Spinacia oleracea	part of a light responsive element
PdWRKY16	Unnamed__1	CGTGG	656	5	+	Zea mays
PdWRKY16	Unnamed__1	CGTGG	1528	5	+	Zea mays
PdWRKY16	TATA-box	TATA	119	4	+	Arabidopsis thaliana	core promoter element around -30 of transcription start
PdWRKY16	TATA-box	taTATAAAtc	150	9	-	Arabidopsis thaliana	core promoter element around -30 of transcription start
PdWRKY16	TATA-box	ATATAT	151	6	+	Brassica napus	core promoter element around -30 of transcription start
PdWRKY16	TATA-box	TATATA	152	6	+	Arabidopsis thaliana	core promoter element around -30 of transcription start
PdWRKY16	TATA-box	ATATAT	153	6	+	Brassica napus	core promoter element around -30 of transcription start
PdWRKY16	TATA-box	TATATA	154	6	+	Arabidopsis thaliana	core promoter element around -30 of transcription start
PdWRKY16	TATA-box	ATATAT	155	6	+	Brassica napus	core promoter element around -30 of transcription start
PdWRKY16	TATA-box	TATATA	156	6	+	Arabidopsis thaliana	core promoter element around -30 of transcription start
PdWRKY16	TATA-box	ATATAT	157	6	+	Brassica napus	core promoter element around -30 of transcription start
PdWRKY16	TATA-box	TATATA	158	6	+	Arabidopsis thaliana	core promoter element around -30 of transcription start
PdWRKY16	TATA-box	ATATAT	159	6	+	Brassica napus	core promoter element around -30 of transcription start
PdWRKY16	TATA-box	TATATA	160	6	+	Arabidopsis thaliana	core promoter element around -30 of transcription start
PdWRKY16	TATA-box	ATATAT	161	6	+	Brassica napus	core promoter element around -30 of transcription start
PdWRKY16	TATA-box	TATATA	162	6	+	Arabidopsis thaliana	core promoter element around -30 of transcription start
PdWRKY16	TATA-box	ATATAT	163	6	+	Brassica napus	core promoter element around -30 of transcription start
PdWRKY16	TATA-box	TATATA	164	6	+	Arabidopsis thaliana	core promoter element around -30 of transcription start
PdWRKY16	TATA-box	ATATAT	165	6	+	Brassica napus	core promoter element around -30 of transcription start
PdWRKY16	TATA-box	TATATA	166	6	+	Arabidopsis thaliana	core promoter element around -30 of transcription start
PdWRKY16	TATA-box	ATATAT	167	6	+	Brassica napus	core promoter element around -30 of transcription start
PdWRKY16	TATA-box	TATA	168	4	+	Arabidopsis thaliana	core promoter element around -30 of transcription start
PdWRKY16	TATA-box	TATA	266	4	+	Arabidopsis thaliana	core promoter element around -30 of transcription start
PdWRKY16	TATA-box	TACAAAA	415	7	+	Oryza sativa	core promoter element around -30 of transcription start
PdWRKY16	TATA-box	TATAAAT	496	7	-	Brassica juncea	core promoter element around -30 of transcription start
PdWRKY16	TATA-box	TATAAA	497	6	-	Helianthus annuus	core promoter element around -30 of transcription start
PdWRKY16	TATA-box	TATAA	498	5	-	Arabidopsis thaliana	core promoter element around -30 of transcription start
PdWRKY16	TATA-box	TATA	499	4	+	Arabidopsis thaliana	core promoter element around -30 of transcription start
PdWRKY16	TATA-box	TATAA	578	5	-	Arabidopsis thaliana	core promoter element around -30 of transcription start
PdWRKY16	TATA-box	TATA	579	4	+	Arabidopsis thaliana	core promoter element around -30 of transcription start
PdWRKY16	TATA-box	ATATAT	600	6	+	Brassica napus	core promoter element around -30 of transcription start
PdWRKY16	TATA-box	TATATA	601	6	+	Arabidopsis thaliana	core promoter element around -30 of transcription start
PdWRKY16	TATA-box	ATATAA	602	6	+	Brassica oleracea	core promoter element around -30 of transcription start
PdWRKY16	TATA-box	TATA	603	4	+	Arabidopsis thaliana	core promoter element around -30 of transcription start
PdWRKY16	TATA-box	TATA	719	4	+	Arabidopsis thaliana	core promoter element around -30 of transcription start
PdWRKY16	TATA-box	TACAAAA	869	7	-	Oryza sativa	core promoter element around -30 of transcription start
PdWRKY16	TATA-box	TATAA	1008	5	-	Arabidopsis thaliana	core promoter element around -30 of transcription start
PdWRKY16	TATA-box	TATA	1009	4	-	Arabidopsis thaliana	core promoter element around -30 of transcription start
PdWRKY16	TATA-box	TATAA	1130	5	-	Arabidopsis thaliana	core promoter element around -30 of transcription start
PdWRKY16	TATA-box	TATA	1131	4	-	Arabidopsis thaliana	core promoter element around -30 of transcription start
PdWRKY16	TATA-box	ATATAA	1331	6	+	Brassica oleracea	core promoter element around -30 of transcription start
PdWRKY16	TATA-box	TATA	1332	4	-	Arabidopsis thaliana	core promoter element around -30 of transcription start
PdWRKY16	TATA-box	ATATAA	1392	6	+	Brassica oleracea	core promoter element around -30 of transcription start
PdWRKY16	TATA-box	TATA	1393	4	-	Arabidopsis thaliana	core promoter element around -30 of transcription start
PdWRKY16	TATA-box	ATATAT	1464	6	-	Brassica napus	core promoter element around -30 of transcription start
PdWRKY16	TATA-box	TATA	1465	4	-	Arabidopsis thaliana	core promoter element around -30 of transcription start
PdWRKY16	TATA-box	TATA	1594	4	-	Arabidopsis thaliana	core promoter element around -30 of transcription start
PdWRKY16	TATA-box	ccTATAAAaa	1667	9	-	Arabidopsis thaliana	core promoter element around -30 of transcription start
PdWRKY16	TATA-box	ATTATA	1669	6	+	Brassica napus	core promoter element around -30 of transcription start
PdWRKY16	TATA-box	TATAA	1670	5	-	Arabidopsis thaliana	core promoter element around -30 of transcription start
PdWRKY16	TATA-box	TATA	1671	4	-	Arabidopsis thaliana	core promoter element around -30 of transcription start
PdWRKY16	TATA-box	ATTATA	1767	6	+	Brassica napus	core promoter element around -30 of transcription start
PdWRKY16	TATA-box	TATATAA	1768	7	-	Arabidopsis thaliana	core promoter element around -30 of transcription start
PdWRKY16	TATA-box	TATATA	1769	6	-	Arabidopsis thaliana	core promoter element around -30 of transcription start
PdWRKY16	TATA-box	TATA	1771	4	-	Arabidopsis thaliana	core promoter element around -30 of transcription start
PdWRKY16	TATA-box	TATA	1997	4	-	Arabidopsis thaliana	core promoter element around -30 of transcription start
PdWRKY16	CCGTCC-box	CCGTCC	545	6	-	Petroselinum hortense
PdWRKY16	ABRE	ACGTG	655	5	+	Arabidopsis thaliana	cis-acting element involved in the abscisic acid responsiveness
PdWRKY16	ABRE	ACGTG	1838	5	-	Arabidopsis thaliana	cis-acting element involved in the abscisic acid responsiveness
PdWRKY16	G-Box	CACGTT	1838	6	+	Pisum sativum	cis-acting regulatory element involved in light responsiveness
PdWRKY16		motif_sequence	68	4	+	organism	short_function
PdWRKY16		motif_sequence	216	4	-	organism	short_function
PdWRKY16		motif_sequence	446	4	-	organism	short_function
PdWRKY16		motif_sequence	616	4	-	organism	short_function
PdWRKY16		motif_sequence	625	4	+	organism	short_function
PdWRKY16		motif_sequence	756	4	-	organism	short_function
PdWRKY16		motif_sequence	1281	4	-	organism	short_function
PdWRKY16		motif_sequence	1377	4	-	organism	short_function
PdWRKY16		motif_sequence	1413	4	+	organism	short_function
PdWRKY16		motif_sequence	1454	4	-	organism	short_function
PdWRKY16		motif_sequence	1473	4	-	organism	short_function
PdWRKY16		motif_sequence	1612	4	+	organism	short_function
PdWRKY16		motif_sequence	1919	4	+	organism	short_function
PdWRKY16	TCT-motif	TCTTAC	873	6	-	Arabidopsis thaliana	part of a light responsive element
PdWRKY16	TCT-motif	TCTTAC	1860	6	-	Arabidopsis thaliana	part of a light responsive element
PdWRKY16	MYC	CATGTG	217	6	-	Arabidopsis thaliana
PdWRKY16	MYC	CATGTG	387	6	+	Arabidopsis thaliana
PdWRKY16	MYC	CATTTG	1273	6	+	Arabidopsis thaliana
PdWRKY16	GT1-motif	GGTTAA	831	6	+	Arabidopsis thaliana	light responsive element
PdWRKY16	AT~TATA-box	TATATA	152	6	+	Arabidopsis thaliana
PdWRKY16	AT~TATA-box	TATATA	154	6	+	Arabidopsis thaliana
PdWRKY16	AT~TATA-box	TATATA	156	6	+	Arabidopsis thaliana
PdWRKY16	AT~TATA-box	TATATA	158	6	+	Arabidopsis thaliana
PdWRKY16	AT~TATA-box	TATATA	160	6	+	Arabidopsis thaliana
PdWRKY16	AT~TATA-box	TATATA	162	6	+	Arabidopsis thaliana
PdWRKY16	AT~TATA-box	TATATA	164	6	+	Arabidopsis thaliana
PdWRKY16	AT~TATA-box	TATATA	166	6	+	Arabidopsis thaliana
PdWRKY16	AT~TATA-box	TATATA	601	6	+	Arabidopsis thaliana
PdWRKY16	AT~TATA-box	TATATA	1769	6	-	Arabidopsis thaliana
PdWRKY16	MYB-like sequence	TAACCA	830	6	-	Arabidopsis thaliana
PdWRKY16	CGTCA-motif	CGTCA	44	5	-	Hordeum vulgare	cis-acting regulatory element involved in the MeJA-responsiveness
PdWRKY16	CGTCA-motif	CGTCA	653	5	-	Hordeum vulgare	cis-acting regulatory element involved in the MeJA-responsiveness
PdWRKY16	CGTCA-motif	CGTCA	1589	5	+	Hordeum vulgare	cis-acting regulatory element involved in the MeJA-responsiveness
PdWRKY16	CARE	CAACTCAC	1087	8	-	Oryza sativa
PdWRKY16	ARE	AAACCA	345	6	+	Zea mays	cis-acting regulatory element essential for the anaerobic induction
PdWRKY16	ARE	AAACCA	1984	6	-	Zea mays	cis-acting regulatory element essential for the anaerobic induction
PdWRKY17	TCT-motif	TCTTAC	1785	6	+	Arabidopsis thaliana	part of a light responsive element
PdWRKY17	GARE-motif	TCTGTTG	1602	7	-	Brassica oleracea	gibberellin-responsive element
PdWRKY17	Myb-binding site	CAACAG	126	6	-	Nicotiana tabacum
PdWRKY17	Myb-binding site	CAACAG	1602	6	+	Nicotiana tabacum
PdWRKY17	MYB	CAACAG	126	6	-	Arabidopsis thaliana
PdWRKY17	MYB	CAACCA	130	6	-	Arabidopsis thaliana
PdWRKY17	MYB	TAACCA	527	6	-	Arabidopsis thaliana
PdWRKY17	MYB	TAACCA	614	6	-	Arabidopsis thaliana
PdWRKY17	MYB	CAACCA	907	6	+	Arabidopsis thaliana
PdWRKY17	MYB	CAACCA	1363	6	-	Arabidopsis thaliana
PdWRKY17	MYB	CAACAG	1602	6	+	Arabidopsis thaliana
PdWRKY17	Myb	CAACTG	105	6	-	Arabidopsis thaliana
PdWRKY17	MYB recognition site	CCGTTG	502	6	-	Arabidopsis thaliana
PdWRKY17	Unnamed__1	CGTGG	525	5	+	Zea mays
PdWRKY17	TATA-box	ATATAA	344	6	+	Brassica oleracea	core promoter element around -30 of transcription start
PdWRKY17	TATA-box	TATA	345	4	+	Arabidopsis thaliana	core promoter element around -30 of transcription start
PdWRKY17	TATA-box	ATTATA	712	6	+	Brassica napus	core promoter element around -30 of transcription start
PdWRKY17	TATA-box	TATAA	713	5	-	Arabidopsis thaliana	core promoter element around -30 of transcription start
PdWRKY17	TATA-box	TATA	714	4	+	Arabidopsis thaliana	core promoter element around -30 of transcription start
PdWRKY17	TATA-box	ATTATA	842	6	+	Brassica napus	core promoter element around -30 of transcription start
PdWRKY17	TATA-box	TATAA	843	5	-	Arabidopsis thaliana	core promoter element around -30 of transcription start
PdWRKY17	TATA-box	TATA	844	4	+	Arabidopsis thaliana	core promoter element around -30 of transcription start
PdWRKY17	TATA-box	TATACA	899	6	-	Helianthus annuus	core promoter element around -30 of transcription start
PdWRKY17	TATA-box	TATA	901	4	+	Arabidopsis thaliana	core promoter element around -30 of transcription start
PdWRKY17	TATA-box	TATA	1232	4	-	Arabidopsis thaliana	core promoter element around -30 of transcription start
PdWRKY17	TATA-box	TATAAAT	1286	7	-	Brassica juncea	core promoter element around -30 of transcription start
PdWRKY17	TATA-box	TATAAA	1287	6	-	Helianthus annuus	core promoter element around -30 of transcription start
PdWRKY17	TATA-box	TATAA	1288	5	-	Arabidopsis thaliana	core promoter element around -30 of transcription start
PdWRKY17	TATA-box	TATA	1289	4	-	Arabidopsis thaliana	core promoter element around -30 of transcription start
PdWRKY17	TATA-box	TATA	1442	4	-	Arabidopsis thaliana	core promoter element around -30 of transcription start
PdWRKY17	TATA-box	TATA	1672	4	-	Arabidopsis thaliana	core promoter element around -30 of transcription start
PdWRKY17	TATA-box	TATAAAA	1858	7	-	Pisum sativum	core promoter element around -30 of transcription start
PdWRKY17	TATA-box	TATAAA	1859	6	-	Helianthus annuus	core promoter element around -30 of transcription start
PdWRKY17	TATA-box	TATATAA	1860	7	-	Arabidopsis thaliana	core promoter element around -30 of transcription start
PdWRKY17	TATA-box	TATATA	1861	6	-	Arabidopsis thaliana	core promoter element around -30 of transcription start
PdWRKY17	TATA-box	TATA	1863	4	-	Arabidopsis thaliana	core promoter element around -30 of transcription start
PdWRKY17	TATA-box	ATATAT	1868	6	-	Brassica napus	core promoter element around -30 of transcription start
PdWRKY17	TATA-box	TATATA	1869	6	-	Arabidopsis thaliana	core promoter element around -30 of transcription start
PdWRKY17	TATA-box	ATATAT	1870	6	-	Brassica napus	core promoter element around -30 of transcription start
PdWRKY17	TATA-box	TATATA	1871	6	-	Arabidopsis thaliana	core promoter element around -30 of transcription start
PdWRKY17	TATA-box	TATA	1873	4	-	Arabidopsis thaliana	core promoter element around -30 of transcription start
PdWRKY17	TATA-box	ATTATA	1982	6	+	Brassica napus	core promoter element around -30 of transcription start
PdWRKY17	TATA-box	TATAA	1983	5	-	Arabidopsis thaliana	core promoter element around -30 of transcription start
PdWRKY17	TATA-box	TATA	1984	4	-	Arabidopsis thaliana	core promoter element around -30 of transcription start
PdWRKY17	ABRE	ACGTG	1557	5	-	Arabidopsis thaliana	cis-acting element involved in the abscisic acid responsiveness
PdWRKY17		motif_sequence	135	4	-	organism	short_function
PdWRKY17		motif_sequence	281	4	+	organism	short_function
PdWRKY17		motif_sequence	376	4	-	organism	short_function
PdWRKY17		motif_sequence	493	4	+	organism	short_function
PdWRKY17		motif_sequence	656	4	-	organism	short_function
PdWRKY17		motif_sequence	847	4	+	organism	short_function
PdWRKY17		motif_sequence	849	4	-	organism	short_function
PdWRKY17		motif_sequence	1190	4	+	organism	short_function
PdWRKY17		motif_sequence	1207	4	+	organism	short_function
PdWRKY17		motif_sequence	1468	4	-	organism	short_function
PdWRKY17		motif_sequence	1797	4	+	organism	short_function
PdWRKY17		motif_sequence	1947	4	+	organism	short_function
PdWRKY17	CAG-motif	GAAAGGCAGAC	668	10	-	Arabidopsis thaliana	part of a light response element
PdWRKY17	CGTCA-motif	CGTCA	481	5	+	Hordeum vulgare	cis-acting regulatory element involved in the MeJA-responsiveness
PdWRKY17	CGTCA-motif	CGTCA	564	5	+	Hordeum vulgare	cis-acting regulatory element involved in the MeJA-responsiveness
PdWRKY17	CGTCA-motif	CGTCA	625	5	+	Hordeum vulgare	cis-acting regulatory element involved in the MeJA-responsiveness
PdWRKY17	CGTCA-motif	CGTCA	944	5	+	Hordeum vulgare	cis-acting regulatory element involved in the MeJA-responsiveness
PdWRKY17	ARE	AAACCA	411	6	+	Zea mays	cis-acting regulatory element essential for the anaerobic induction
PdWRKY17	ARE	AAACCA	734	6	+	Zea mays	cis-acting regulatory element essential for the anaerobic induction
PdWRKY17	ARE	AAACCA	1196	6	+	Zea mays	cis-acting regulatory element essential for the anaerobic induction
PdWRKY17	Myc	TCTCTTA	347	7	-	Arabidopsis thaliana
PdWRKY17	Myc	TCTCTTA	592	7	-	Arabidopsis thaliana
PdWRKY17	Myc	TCTCTTA	762	7	+	Arabidopsis thaliana
PdWRKY17	Myc	TCTCTTA	1783	7	+	Arabidopsis thaliana
PdWRKY17	MYC	CAATTG	821	6	+	Arabidopsis thaliana
PdWRKY17	MYC	CATGTG	1424	6	+	Arabidopsis thaliana
PdWRKY17	MYC	CATTTG	1518	6	-	Arabidopsis thaliana
PdWRKY17	MYC	CATTTG	1580	6	+	Arabidopsis thaliana
PdWRKY17	MYC	CATGTG	1794	6	-	Arabidopsis thaliana
PdWRKY17	GT1-motif	GGTTAAT	528	7	+	Avena sativa	light responsive element
PdWRKY17	GT1-motif	GGTTAA	615	6	+	Arabidopsis thaliana	light responsive element
PdWRKY17	GT1-motif	GGTTAA	1635	6	-	Arabidopsis thaliana	light responsive element
PdWRKY17	AT~TATA-box	TATATAAA	1859	8	-	Arabidopsis thaliana
PdWRKY17	AT~TATA-box	TATATA	1861	6	-	Arabidopsis thaliana
PdWRKY17	AT~TATA-box	TATATA	1869	6	-	Arabidopsis thaliana
PdWRKY17	AT~TATA-box	TATATA	1871	6	-	Arabidopsis thaliana
PdWRKY17	MYB-like sequence	TAACCA	527	6	-	Arabidopsis thaliana
PdWRKY17	MYB-like sequence	TAACCA	614	6	-	Arabidopsis thaliana
PdWRKY17	GATA-motif	AAGGATAAGG	1339	9	-	Solanum tuberosum	part of a light responsive element
PdWRKY17	AAGAA-motif	gGTAAAGAAA	402	9	+	Avena sativa
PdWRKY17	AAGAA-motif	GAAAGAA	1053	7	-	Avena sativa
PdWRKY17	WUN-motif	AAATTTCCT	722	9	-	Brassica oleracea	wound-responsive element
PdWRKY17	WUN-motif	CCATTTCAA	1294	9	-	Nicotiana glutinosa
PdWRKY17	CAAT-box	CAAT	100	4	+	Nicotiana glutinosa
PdWRKY17	CAAT-box	CAAT	288	4	+	Nicotiana glutinosa
PdWRKY17	CAAT-box	CCAAT	610	5	+	Arabidopsis thaliana	common cis-acting element in promoter and enhancer regions
PdWRKY17	CAAT-box	CAAT	611	4	+	Nicotiana glutinosa
PdWRKY17	CAAT-box	TGCCAAC	754	7	-	Petunia hybrida	common cis-acting element in promoter and enhancer regions
PdWRKY17	CAAT-box	CAAT	821	4	+	Nicotiana glutinosa
PdWRKY17	CAAT-box	CCAAT	823	5	-	Arabidopsis thaliana	common cis-acting element in promoter and enhancer regions
PdWRKY17	CAAT-box	CAAT	926	4	-	Nicotiana glutinosa
PdWRKY17	CAAT-box	CAAT	1188	4	+	Nicotiana glutinosa
PdWRKY17	CAAT-box	CAAT	1293	4	-	Nicotiana glutinosa
PdWRKY17	CAAT-box	CAAT	1408	4	+	Nicotiana glutinosa
PdWRKY17	CAAT-box	CAAAT	1410	5	-	Pisum sativum	common cis-acting element in promoter and enhancer regions
PdWRKY17	CAAT-box	CAAAT	1518	5	+	Pisum sativum	common cis-acting element in promoter and enhancer regions
PdWRKY17	CAAT-box	CAAT	1529	4	-	Nicotiana glutinosa
PdWRKY17	CAAT-box	CAAAT	1581	5	-	Pisum sativum	common cis-acting element in promoter and enhancer regions
PdWRKY17	CAAT-box	CAAT	1587	4	-	Nicotiana glutinosa
PdWRKY17	CAAT-box	CAAT	1693	4	+	Nicotiana glutinosa
PdWRKY17	CAAT-box	CAAT	1738	4	+	Nicotiana glutinosa
PdWRKY17	CCAAT-box	CAACGG	502	6	+	Hordeum vulgare	MYBHv1 binding site
PdWRKY17	W box	TTGACC	1327	6	-	Arabidopsis thaliana
PdWRKY17	TGACG-motif	TGACG	481	5	-	Hordeum vulgare	cis-acting regulatory element involved in the MeJA-responsiveness
PdWRKY17	TGACG-motif	TGACG	564	5	-	Hordeum vulgare	cis-acting regulatory element involved in the MeJA-responsiveness
PdWRKY17	TGACG-motif	TGACG	625	5	-	Hordeum vulgare	cis-acting regulatory element involved in the MeJA-responsiveness
PdWRKY17	TGACG-motif	TGACG	944	5	-	Hordeum vulgare	cis-acting regulatory element involved in the MeJA-responsiveness
PdWRKY17	STRE	AGGGG	707	5	-	Arabidopsis thaliana
PdWRKY17	STRE	AGGGG	810	5	+	Arabidopsis thaliana
PdWRKY17	STRE	AGGGG	1036	5	+	Arabidopsis thaliana
PdWRKY17	STRE	AGGGG	1355	5	-	Arabidopsis thaliana
PdWRKY17	AC-I	GCTTACCTACCA	1363	11	-	Arabidopsis thaliana
PdWRKY17	I-box	atGATAAGGTC	1337	10	-	Helianthus annuus	part of a light responsive element
PdWRKY17	I-box	ccttatcct	1339	9	+	Arabidopsis thaliana	part of a light responsive element
PdWRKY17	I-box	AAGATAAGGCT	1680	10	-	Gossypium hirsutum	part of a light responsive element
PdWRKY17	G-box	CACGTC	1557	6	+	Zea mays	cis-acting regulatory element involved in light responsiveness
PdWRKY17	Unnamed__4	CTCC	13	4	-	Petroselinum hortense
PdWRKY17	Unnamed__4	CTCC	376	4	-	Petroselinum hortense
PdWRKY17	Unnamed__4	CTCC	433	4	-	Petroselinum hortense
PdWRKY17	Unnamed__4	CTCC	1062	4	+	Petroselinum hortense
PdWRKY17	Unnamed__4	CTCC	1181	4	+	Petroselinum hortense
PdWRKY17	Unnamed__4	CTCC	1209	4	+	Petroselinum hortense
PdWRKY17	Unnamed__4	CTCC	1468	4	-	Petroselinum hortense
PdWRKY17	Unnamed__4	CTCC	1648	4	-	Petroselinum hortense
PdWRKY17	Unnamed__4	CTCC	1995	4	-	Petroselinum hortense
PdWRKY17	as-1	TGACG	481	5	-	Arabidopsis thaliana
PdWRKY17	as-1	TGACG	564	5	-	Arabidopsis thaliana
PdWRKY17	as-1	TGACG	625	5	-	Arabidopsis thaliana
PdWRKY17	as-1	TGACG	944	5	-	Arabidopsis thaliana
PdWRKY17	MBS	CAACTG	105	6	-	Arabidopsis thaliana	MYB binding site involved in drought-inducibility
PdWRKY18	MRE	AACCTAA	1308	7	-	Petroselinum crispum	MYB binding site involved in light responsiveness
PdWRKY18	MRE	AACCTAA	1439	7	+	Petroselinum crispum	MYB binding site involved in light responsiveness
PdWRKY18	STRE	AGGGG	34	5	-	Arabidopsis thaliana
PdWRKY18	STRE	AGGGG	224	5	-	Arabidopsis thaliana
PdWRKY18	STRE	AGGGG	513	5	+	Arabidopsis thaliana
PdWRKY18	STRE	AGGGG	623	5	-	Arabidopsis thaliana
PdWRKY18	STRE	AGGGG	667	5	+	Arabidopsis thaliana
PdWRKY18	STRE	AGGGG	1681	5	+	Arabidopsis thaliana
PdWRKY18	Box 4	ATTAAT	21	6	+	Petroselinum crispum	part of a conserved DNA module involved in light responsiveness
PdWRKY18	Box 4	ATTAAT	1387	6	-	Petroselinum crispum	part of a conserved DNA module involved in light responsiveness
PdWRKY18	Box 4	ATTAAT	1735	6	-	Petroselinum crispum	part of a conserved DNA module involved in light responsiveness
PdWRKY18	P-box	CCTTTTG	941	7	+	Oryza sativa	gibberellin-responsive element
PdWRKY18	WRE3	CCACCT	184	6	+	Pisum sativum
PdWRKY18	CAAT-box	CAAT	7	4	-	Nicotiana glutinosa
PdWRKY18	CAAT-box	CAAT	47	4	+	Nicotiana glutinosa
PdWRKY18	CAAT-box	CAAT	75	4	-	Nicotiana glutinosa
PdWRKY18	CAAT-box	CAAT	113	4	-	Nicotiana glutinosa
PdWRKY18	CAAT-box	CAAT	158	4	+	Nicotiana glutinosa
PdWRKY18	CAAT-box	CAAT	180	4	-	Nicotiana glutinosa
PdWRKY18	CAAT-box	CAAT	191	4	+	Nicotiana glutinosa
PdWRKY18	CAAT-box	CAAT	193	4	-	Nicotiana glutinosa
PdWRKY18	CAAT-box	CAAT	214	4	+	Nicotiana glutinosa
PdWRKY18	CAAT-box	CAAT	405	4	-	Nicotiana glutinosa
PdWRKY18	CAAT-box	CCCAATTT	438	8	-	Arabidopsis thaliana	common cis-acting element in promoter and enhancer regions
PdWRKY18	CAAT-box	CCAAT	440	5	-	Arabidopsis thaliana	common cis-acting element in promoter and enhancer regions
PdWRKY18	CAAT-box	CAAT	473	4	-	Nicotiana glutinosa
PdWRKY18	CAAT-box	CAAT	559	4	+	Nicotiana glutinosa
PdWRKY18	CAAT-box	CAAT	575	4	+	Nicotiana glutinosa
PdWRKY18	CAAT-box	CAAAT	602	5	-	Pisum sativum	common cis-acting element in promoter and enhancer regions
PdWRKY18	CAAT-box	CAAT	682	4	-	Nicotiana glutinosa
PdWRKY18	CAAT-box	CAAAT	766	5	-	Pisum sativum	common cis-acting element in promoter and enhancer regions
PdWRKY18	CAAT-box	CCAAT	804	5	-	Arabidopsis thaliana	common cis-acting element in promoter and enhancer regions
PdWRKY18	CAAT-box	CAAT	876	4	+	Nicotiana glutinosa
PdWRKY18	CAAT-box	CAAAT	1006	5	-	Pisum sativum	common cis-acting element in promoter and enhancer regions
PdWRKY18	CAAT-box	CAAT	1012	4	-	Nicotiana glutinosa
PdWRKY18	CAAT-box	CAAT	1067	4	+	Nicotiana glutinosa
PdWRKY18	CAAT-box	CAAT	1169	4	-	Nicotiana glutinosa
PdWRKY18	CAAT-box	CCAAT	1199	5	-	Arabidopsis thaliana	common cis-acting element in promoter and enhancer regions
PdWRKY18	CAAT-box	CAAT	1244	4	+	Nicotiana glutinosa
PdWRKY18	CAAT-box	CAAAT	1352	5	-	Pisum sativum	common cis-acting element in promoter and enhancer regions
PdWRKY18	CAAT-box	CAAT	1371	4	-	Nicotiana glutinosa
PdWRKY18	CAAT-box	CAAT	1425	4	-	Nicotiana glutinosa
PdWRKY18	CAAT-box	CAAT	1598	4	-	Nicotiana glutinosa
PdWRKY18	CAAT-box	CCAAT	1650	5	-	Arabidopsis thaliana	common cis-acting element in promoter and enhancer regions
PdWRKY18	CAAT-box	CAAAT	1695	5	+	Pisum sativum	common cis-acting element in promoter and enhancer regions
PdWRKY18	CAAT-box	CAAT	1733	4	+	Nicotiana glutinosa
PdWRKY18	CAAT-box	CAAT	1746	4	+	Nicotiana glutinosa
PdWRKY18	CAAT-box	CAAT	1757	4	+	Nicotiana glutinosa
PdWRKY18	CAAT-box	CCAAT	1814	5	-	Arabidopsis thaliana	common cis-acting element in promoter and enhancer regions
PdWRKY18	CAAT-box	CAAT	1822	4	+	Nicotiana glutinosa
PdWRKY18	CAAT-box	CAAAT	1881	5	+	Pisum sativum	common cis-acting element in promoter and enhancer regions
PdWRKY18	CAAT-box	CAAAT	1929	5	+	Pisum sativum	common cis-acting element in promoter and enhancer regions
PdWRKY18	CAAT-box	CAAAT	1959	5	+	Pisum sativum	common cis-acting element in promoter and enhancer regions
PdWRKY18	CAAT-box	CAAT	1967	4	-	Nicotiana glutinosa
PdWRKY18	TGA-element	AACGAC	1561	6	+	Brassica oleracea	auxin-responsive element
PdWRKY18	AAGAA-motif	GAAAGAA	1988	7	-	Avena sativa
PdWRKY18	GATA-motif	AAGGATAAGG	1723	9	-	Solanum tuberosum	part of a light responsive element
PdWRKY18	LTR	CCGAAA	842	6	-	Hordeum vulgare	cis-acting element involved in low-temperature responsiveness
PdWRKY18	TCA-element	TCAGAAGAGG	12	9	-	Brassica oleracea	cis-acting element involved in salicylic acid responsiveness
PdWRKY18	TCA-element	CCATCTTTTT	864	10	+	Nicotiana tabacum	cis-acting element involved in salicylic acid responsiveness
PdWRKY18	Unnamed__4	CTCC	631	4	+	Petroselinum hortense
PdWRKY18	Unnamed__4	CTCC	722	4	+	Petroselinum hortense
PdWRKY18	Unnamed__4	CTCC	738	4	+	Petroselinum hortense
PdWRKY18	Unnamed__4	CTCC	856	4	+	Petroselinum hortense
PdWRKY18	Unnamed__4	CTCC	939	4	+	Petroselinum hortense
PdWRKY18	Unnamed__4	CTCC	988	4	+	Petroselinum hortense
PdWRKY18	Unnamed__4	CTCC	1537	4	+	Petroselinum hortense
PdWRKY18	Unnamed__4	CTCC	1658	4	-	Petroselinum hortense
PdWRKY18	Unnamed__4	CTCC	1839	4	+	Petroselinum hortense
PdWRKY18	I-box	AAGATAAGGCT	1035	10	-	Gossypium hirsutum	part of a light responsive element
PdWRKY18	LAMP-element	CTTTATCA	195	8	-	Pisum sativum	part of a light responsive element
PdWRKY18	LAMP-element	CTTTATCA	390	8	-	Pisum sativum	part of a light responsive element
PdWRKY18		motif_sequence	227	4	+	organism	short_function
PdWRKY18		motif_sequence	244	4	-	organism	short_function
PdWRKY18		motif_sequence	381	4	-	organism	short_function
PdWRKY18		motif_sequence	696	4	+	organism	short_function
PdWRKY18		motif_sequence	703	4	+	organism	short_function
PdWRKY18		motif_sequence	708	4	+	organism	short_function
PdWRKY18		motif_sequence	716	4	+	organism	short_function
PdWRKY18		motif_sequence	732	4	+	organism	short_function
PdWRKY18		motif_sequence	829	4	+	organism	short_function
PdWRKY18		motif_sequence	854	4	+	organism	short_function
PdWRKY18		motif_sequence	902	4	-	organism	short_function
PdWRKY18		motif_sequence	937	4	+	organism	short_function
PdWRKY18		motif_sequence	986	4	+	organism	short_function
PdWRKY18		motif_sequence	1300	4	-	organism	short_function
PdWRKY18		motif_sequence	1463	4	+	organism	short_function
PdWRKY18		motif_sequence	1535	4	+	organism	short_function
PdWRKY18		motif_sequence	1612	4	+	organism	short_function
PdWRKY18		motif_sequence	1854	4	-	organism	short_function
PdWRKY18	TATA-box	taTATAAAtc	112	9	-	Arabidopsis thaliana	core promoter element around -30 of transcription start
PdWRKY18	TATA-box	taTATAAAtc	116	9	-	Arabidopsis thaliana	core promoter element around -30 of transcription start
PdWRKY18	TATA-box	ATATAT	117	6	+	Brassica napus	core promoter element around -30 of transcription start
PdWRKY18	TATA-box	TATATA	118	6	+	Arabidopsis thaliana	core promoter element around -30 of transcription start
PdWRKY18	TATA-box	ATATAT	119	6	+	Brassica napus	core promoter element around -30 of transcription start
PdWRKY18	TATA-box	TATATA	120	6	+	Arabidopsis thaliana	core promoter element around -30 of transcription start
PdWRKY18	TATA-box	ATATAT	121	6	+	Brassica napus	core promoter element around -30 of transcription start
PdWRKY18	TATA-box	TATATA	122	6	+	Arabidopsis thaliana	core promoter element around -30 of transcription start
PdWRKY18	TATA-box	ATATAT	123	6	+	Brassica napus	core promoter element around -30 of transcription start
PdWRKY18	TATA-box	TATATA	124	6	+	Arabidopsis thaliana	core promoter element around -30 of transcription start
PdWRKY18	TATA-box	ATATAT	125	6	+	Brassica napus	core promoter element around -30 of transcription start
PdWRKY18	TATA-box	TATATA	126	6	+	Arabidopsis thaliana	core promoter element around -30 of transcription start
PdWRKY18	TATA-box	ATATAT	127	6	+	Brassica napus	core promoter element around -30 of transcription start
PdWRKY18	TATA-box	TATATA	128	6	+	Arabidopsis thaliana	core promoter element around -30 of transcription start
PdWRKY18	TATA-box	ATATAT	129	6	+	Brassica napus	core promoter element around -30 of transcription start
PdWRKY18	TATA-box	TATATA	130	6	+	Arabidopsis thaliana	core promoter element around -30 of transcription start
PdWRKY18	TATA-box	ATATAT	131	6	+	Brassica napus	core promoter element around -30 of transcription start
PdWRKY18	TATA-box	TATATA	132	6	+	Arabidopsis thaliana	core promoter element around -30 of transcription start
PdWRKY18	TATA-box	TATA	134	4	+	Arabidopsis thaliana	core promoter element around -30 of transcription start
PdWRKY18	TATA-box	TAAAGATT	479	8	+	Arabidopsis thaliana	core promoter element around -30 of transcription start
PdWRKY18	TATA-box	TATAA	501	5	-	Arabidopsis thaliana	core promoter element around -30 of transcription start
PdWRKY18	TATA-box	TATA	502	4	+	Arabidopsis thaliana	core promoter element around -30 of transcription start
PdWRKY18	TATA-box	TACAAAA	943	7	-	Oryza sativa	core promoter element around -30 of transcription start
PdWRKY18	TATA-box	TATA	1320	4	-	Arabidopsis thaliana	core promoter element around -30 of transcription start
PdWRKY18	TATA-box	ATTATA	1402	6	+	Brassica napus	core promoter element around -30 of transcription start
PdWRKY18	TATA-box	TATAA	1403	5	-	Arabidopsis thaliana	core promoter element around -30 of transcription start
PdWRKY18	TATA-box	TATA	1404	4	-	Arabidopsis thaliana	core promoter element around -30 of transcription start
PdWRKY18	TATA-box	ATATAA	1420	6	+	Brassica oleracea	core promoter element around -30 of transcription start
PdWRKY18	TATA-box	TATA	1421	4	-	Arabidopsis thaliana	core promoter element around -30 of transcription start
PdWRKY18	TATA-box	ATATAA	1448	6	+	Brassica oleracea	core promoter element around -30 of transcription start
PdWRKY18	TATA-box	TATA	1449	4	-	Arabidopsis thaliana	core promoter element around -30 of transcription start
PdWRKY18	TATA-box	TATAAAT	1455	7	-	Brassica juncea	core promoter element around -30 of transcription start
PdWRKY18	TATA-box	TATAAA	1456	6	-	Helianthus annuus	core promoter element around -30 of transcription start
PdWRKY18	TATA-box	TATAA	1457	5	-	Arabidopsis thaliana	core promoter element around -30 of transcription start
PdWRKY18	TATA-box	TATA	1458	4	-	Arabidopsis thaliana	core promoter element around -30 of transcription start
PdWRKY18	TATA-box	TATAA	1474	5	-	Arabidopsis thaliana	core promoter element around -30 of transcription start
PdWRKY18	TATA-box	TATA	1475	4	-	Arabidopsis thaliana	core promoter element around -30 of transcription start
PdWRKY18	TATA-box	TACAAAA	1936	7	-	Oryza sativa	core promoter element around -30 of transcription start
PdWRKY18	MYB	CAACAG	304	6	+	Arabidopsis thaliana
PdWRKY18	MYB	CAACAG	338	6	+	Arabidopsis thaliana
PdWRKY18	MYB	TAACCA	372	6	-	Arabidopsis thaliana
PdWRKY18	MYB	CAACCA	796	6	+	Arabidopsis thaliana
PdWRKY18	Myb-binding site	CAACAG	304	6	+	Nicotiana tabacum
PdWRKY18	Myb-binding site	CAACAG	338	6	+	Nicotiana tabacum
PdWRKY18	TCT-motif	TCTTAC	947	6	-	Arabidopsis thaliana	part of a light responsive element
PdWRKY18	TCT-motif	TCTTAC	1542	6	+	Arabidopsis thaliana	part of a light responsive element
PdWRKY18	MYB-like sequence	TAACCA	372	6	-	Arabidopsis thaliana
PdWRKY18	AT~TATA-box	TATATA	118	6	+	Arabidopsis thaliana
PdWRKY18	AT~TATA-box	TATATA	120	6	+	Arabidopsis thaliana
PdWRKY18	AT~TATA-box	TATATA	122	6	+	Arabidopsis thaliana
PdWRKY18	AT~TATA-box	TATATA	124	6	+	Arabidopsis thaliana
PdWRKY18	AT~TATA-box	TATATA	126	6	+	Arabidopsis thaliana
PdWRKY18	AT~TATA-box	TATATA	128	6	+	Arabidopsis thaliana
PdWRKY18	AT~TATA-box	TATATA	130	6	+	Arabidopsis thaliana
PdWRKY18	AT~TATA-box	TATATA	132	6	+	Arabidopsis thaliana
PdWRKY18	MYC	CAATTG	191	6	+	Arabidopsis thaliana
PdWRKY18	MYC	CATTTG	1695	6	-	Arabidopsis thaliana
PdWRKY18	TATA	TATAAAAT	1449	8	+	Arabidopsis thaliana
PdWRKY18	ARE	AAACCA	54	6	+	Zea mays	cis-acting regulatory element essential for the anaerobic induction
PdWRKY18	ARE	AAACCA	432	6	+	Zea mays	cis-acting regulatory element essential for the anaerobic induction
PdWRKY18	ARE	AAACCA	1218	6	-	Zea mays	cis-acting regulatory element essential for the anaerobic induction
PdWRKY18	ARE	AAACCA	1816	6	-	Zea mays	cis-acting regulatory element essential for the anaerobic induction
PdWRKY18	ARE	AAACCA	1868	6	-	Zea mays	cis-acting regulatory element essential for the anaerobic induction
PdWRKY18	3-AF1 binding site	TAAGAGAGGAA	711	10	-	Solanum tuberosum	light responsive element
PdWRKY19	GT1-motif	GGTTAA	269	6	+	Arabidopsis thaliana	light responsive element
PdWRKY19	MYC	CAATTG	1563	6	-	Arabidopsis thaliana
PdWRKY19	MYC	CATTTG	1639	6	-	Arabidopsis thaliana
PdWRKY19	MYC	CATTTG	1855	6	-	Arabidopsis thaliana
PdWRKY19	MYB-like sequence	TAACCA	268	6	-	Arabidopsis thaliana
PdWRKY19	MYB-like sequence	TAACCA	1625	6	-	Arabidopsis thaliana
PdWRKY19	ACTCATCCT sequence	ACTCATCCT	1089	9	-	Arabidopsis thaliana
PdWRKY19	AT~TATA-box	TATATA	774	6	+	Arabidopsis thaliana
PdWRKY19	AT~TATA-box	TATATA	776	6	+	Arabidopsis thaliana
PdWRKY19	CARE	CAACTCCC	842	8	-	Oryza sativa
PdWRKY19	circadian	CAAAGATATC	547	9	+	Lycopersicon esculentum	cis-acting regulatory element involved in circadian control
PdWRKY19	CGTCA-motif	CGTCA	422	5	-	Hordeum vulgare	cis-acting regulatory element involved in the MeJA-responsiveness
PdWRKY19	CGTCA-motif	CGTCA	1884	5	-	Hordeum vulgare	cis-acting regulatory element involved in the MeJA-responsiveness
PdWRKY19	CGTCA-motif	CGTCA	1887	5	+	Hordeum vulgare	cis-acting regulatory element involved in the MeJA-responsiveness
PdWRKY19	box S	AGCCACC	1834	7	-	Arabidopsis thaliana
PdWRKY19	Myc	TCTCTTA	1296	7	-	Arabidopsis thaliana
PdWRKY19	TATA	TATAAAAT	723	8	-	Arabidopsis thaliana
PdWRKY19	ARE	AAACCA	1446	6	+	Zea mays	cis-acting regulatory element essential for the anaerobic induction
PdWRKY19	Unnamed__1	GCCACGTGGC	81	9	+	Petunia sp.
PdWRKY19	Unnamed__1	CGTGG	82	5	-	Zea mays
PdWRKY19	Unnamed__1	CGTGG	85	5	+	Zea mays
PdWRKY19	Unnamed__1	CGTGG	112	5	+	Zea mays
PdWRKY19	Unnamed__1	GCCACGTGGC	1830	9	-	Petunia sp.
PdWRKY19	MYB	TAACCA	268	6	-	Arabidopsis thaliana
PdWRKY19	MYB	CAACCA	287	6	-	Arabidopsis thaliana
PdWRKY19	MYB	CAACCA	918	6	-	Arabidopsis thaliana
PdWRKY19	MYB	TAACCA	1625	6	-	Arabidopsis thaliana
PdWRKY19	MYB	CAACCA	1895	6	+	Arabidopsis thaliana
PdWRKY19	Myb	TAACTG	264	6	+	Arabidopsis thaliana
PdWRKY19	G-Box	CACGTG	83	6	+	Pisum sativum	cis-acting regulatory element involved in light responsiveness
PdWRKY19	G-Box	CACGTT	885	6	+	Pisum sativum	cis-acting regulatory element involved in light responsiveness
PdWRKY19	G-Box	CACGTG	1107	6	-	Pisum sativum	cis-acting regulatory element involved in light responsiveness
PdWRKY19	G-Box	CACGTT	1368	6	+	Pisum sativum	cis-acting regulatory element involved in light responsiveness
PdWRKY19		motif_sequence	1	4	-	organism	short_function
PdWRKY19		motif_sequence	57	4	+	organism	short_function
PdWRKY19		motif_sequence	253	4	-	organism	short_function
PdWRKY19		motif_sequence	428	4	-	organism	short_function
PdWRKY19		motif_sequence	689	4	-	organism	short_function
PdWRKY19		motif_sequence	947	4	-	organism	short_function
PdWRKY19		motif_sequence	1244	4	+	organism	short_function
PdWRKY19		motif_sequence	1301	4	-	organism	short_function
PdWRKY19		motif_sequence	1968	4	+	organism	short_function
PdWRKY19	ABRE	CACGTG	83	6	+	Arabidopsis thaliana	cis-acting element involved in the abscisic acid responsiveness
PdWRKY19	ABRE	ACGTG	84	5	+	Arabidopsis thaliana	cis-acting element involved in the abscisic acid responsiveness
PdWRKY19	ABRE	GCCGCGTGGC	108	9	+	Oryza sativa	cis-acting element involved in the abscisic acid responsiveness
PdWRKY19	ABRE	ACGTG	424	5	+	Arabidopsis thaliana	cis-acting element involved in the abscisic acid responsiveness
PdWRKY19	ABRE	ACGTG	885	5	-	Arabidopsis thaliana	cis-acting element involved in the abscisic acid responsiveness
PdWRKY19	ABRE	CACGTG	1107	6	-	Arabidopsis thaliana	cis-acting element involved in the abscisic acid responsiveness
PdWRKY19	ABRE	ACGTG	1108	5	+	Arabidopsis thaliana	cis-acting element involved in the abscisic acid responsiveness
PdWRKY19	ABRE	ACGTG	1368	5	-	Arabidopsis thaliana	cis-acting element involved in the abscisic acid responsiveness
PdWRKY19	TATA-box	TATA	7	4	+	Arabidopsis thaliana	core promoter element around -30 of transcription start
PdWRKY19	TATA-box	TATA	138	4	+	Arabidopsis thaliana	core promoter element around -30 of transcription start
PdWRKY19	TATA-box	TATA	276	4	+	Arabidopsis thaliana	core promoter element around -30 of transcription start
PdWRKY19	TATA-box	TATAAAA	724	7	-	Pisum sativum	core promoter element around -30 of transcription start
PdWRKY19	TATA-box	TATAAA	725	6	-	Helianthus annuus	core promoter element around -30 of transcription start
PdWRKY19	TATA-box	TATAA	726	5	-	Arabidopsis thaliana	core promoter element around -30 of transcription start
PdWRKY19	TATA-box	TATA	727	4	+	Arabidopsis thaliana	core promoter element around -30 of transcription start
PdWRKY19	TATA-box	TATATA	774	6	+	Arabidopsis thaliana	core promoter element around -30 of transcription start
PdWRKY19	TATA-box	ATATAT	775	6	+	Brassica napus	core promoter element around -30 of transcription start
[truncated: 8,894 more rows]

## Sheet: Sheet1
Cis-element analyses of the PdWRKY genes
Gene name	Cis-acting element name	Nucleotide type	Cis-acting element starting position	Cis-acting element length	Functional annotation
PdWRKY1	AT~TATA-box	TATATAAA	625	8
PdWRKY1	AT~TATA-box	TATATA	627	6
PdWRKY1	AT~TATA-box	TATATA	1051	6
PdWRKY1	MYC	CATTTG	217	6
PdWRKY1	MYC	CATTTG	719	6
PdWRKY1	MYC	CATGTG	1007	6
PdWRKY1	MYC	CATTTG	1278	6
PdWRKY1	MYC	CATTTG	1501	6
PdWRKY1	MYC	CAATTG	1743	6
PdWRKY1	MYC	CATTTG	1759	6
PdWRKY1	MYC	CATGTG	1886	6
PdWRKY1	MSA-like	TCCAACGGT	1939	9	cis-acting element involved in cell cycle regulation
PdWRKY1	Myc	TCTCTTA	1720	7
PdWRKY1	TATA-box	TATA	44	4	core promoter element around -30 of transcription start
PdWRKY1	TATA-box	ATATAT	64	6	core promoter element around -30 of transcription start
PdWRKY1	TATA-box	TATA	65	4	core promoter element around -30 of transcription start
PdWRKY1	TATA-box	taTATAAAtc	623	9	core promoter element around -30 of transcription start
PdWRKY1	TATA-box	TATAAA	625	6	core promoter element around -30 of transcription start
PdWRKY1	TATA-box	TATATAA	626	7	core promoter element around -30 of transcription start
PdWRKY1	TATA-box	TATATA	627	6	core promoter element around -30 of transcription start
PdWRKY1	TATA-box	ATATAT	628	6	core promoter element around -30 of transcription start
PdWRKY1	TATA-box	TATA	629	4	core promoter element around -30 of transcription start
PdWRKY1	TATA-box	TATAAAA	978	7	core promoter element around -30 of transcription start
PdWRKY1	TATA-box	TATAAA	979	6	core promoter element around -30 of transcription start
PdWRKY1	TATA-box	TATAA	980	5	core promoter element around -30 of transcription start
PdWRKY1	TATA-box	TATA	981	4	core promoter element around -30 of transcription start
PdWRKY1	TATA-box	TATATAA	1050	7	core promoter element around -30 of transcription start
PdWRKY1	TATA-box	TATATA	1051	6	core promoter element around -30 of transcription start
PdWRKY1	TATA-box	TATA	1053	4	core promoter element around -30 of transcription start
PdWRKY1	TATA-box	TATAAAA	1113	7	core promoter element around -30 of transcription start
PdWRKY1	TATA-box	TATAAA	1114	6	core promoter element around -30 of transcription start
PdWRKY1	TATA-box	TATAA	1115	5	core promoter element around -30 of transcription start
PdWRKY1	TATA-box	TATA	1116	4	core promoter element around -30 of transcription start
PdWRKY1	TATA-box	ATATAA	1125	6	core promoter element around -30 of transcription start
PdWRKY1	TATA-box	TATA	1126	4	core promoter element around -30 of transcription start
PdWRKY1	TATA-box	TACAAAA	1157	7	core promoter element around -30 of transcription start
PdWRKY1	TATA-box	TATTTAAA	1297	8	core promoter element around -30 of transcription start
PdWRKY1	TATA-box	ccTATAAAaa	1373	9	core promoter element around -30 of transcription start
PdWRKY1	TATA-box	TACAAAA	1375	7	core promoter element around -30 of transcription start
PdWRKY1	TATA-box	TATA	1383	4	core promoter element around -30 of transcription start
PdWRKY1	TATA-box	TAAAGATT	1421	8	core promoter element around -30 of transcription start
PdWRKY1	TATA-box	TATAAGAA	1551	8	core promoter element around -30 of transcription start
PdWRKY1	TATA-box	TATAA	1554	5	core promoter element around -30 of transcription start
PdWRKY1	TATA-box	TATA	1555	4	core promoter element around -30 of transcription start
PdWRKY1	TATA-box	ATTATA	1589	6	core promoter element around -30 of transcription start
PdWRKY1	TATA-box	TATAA	1590	5	core promoter element around -30 of transcription start
PdWRKY1	TATA-box	TATA	1591	4	core promoter element around -30 of transcription start
PdWRKY1	TATA-box	TATAAAA	1983	7	core promoter element around -30 of transcription start
PdWRKY1	TATA-box	TATAAA	1984	6	core promoter element around -30 of transcription start
PdWRKY1	TATA-box	TATAA	1985	5	core promoter element around -30 of transcription start
PdWRKY1	TATA-box	TATA	1986	4	core promoter element around -30 of transcription start
PdWRKY1	MYB recognition site	CCGTTG	329	6
PdWRKY1	MYB recognition site	CCGTTG	913	6
PdWRKY1	MYB recognition site	CCGTTG	1940	6
PdWRKY1	Myb	CAACTG	1344	6
PdWRKY1	MYB	CAACCA	221	6
PdWRKY1	MYB	CAACCA	306	6
PdWRKY1	MYB	CAACCA	525	6
PdWRKY1	MYB	CAACAG	775	6
PdWRKY1	MYB	TAACCA	1222	6
PdWRKY1	MYB	CAACCA	1289	6
PdWRKY1	Myb-binding site	CAACAG	775	6
PdWRKY1	GARE-motif	TCTGTTG	775	7	gibberellin-responsive element
PdWRKY1	as-1	TGACG	1019	5
PdWRKY1	TCA-element	CCATCTTTTT	1159	9	cis-acting element involved in salicylic acid responsiveness
PdWRKY1	ATCT-motif	AATCTAATCC	82	10	part of a conserved DNA module involved in light responsiveness
PdWRKY1	Unnamed__4	CTCC	258	4
PdWRKY1	Unnamed__4	CTCC	263	4
PdWRKY1	Unnamed__4	CTCC	451	4
PdWRKY1	Unnamed__4	CTCC	1170	4
PdWRKY1	Unnamed__4	CTCC	1622	4
PdWRKY1	Unnamed__4	CTCC	1844	4
PdWRKY1	Unnamed__4	CTCC	1863	4
PdWRKY1	Unnamed__4	CTCC	1935	4
PdWRKY1	O2-site	GATGACATGG	1877	9	cis-acting regulatory element involved in zein metabolism regulation
PdWRKY1	I-box	TGATAATGT	991	9	part of a light responsive element
PdWRKY1	Box 4	ATTAAT	123	6	part of a conserved DNA module involved in light responsiveness
PdWRKY1	Box 4	ATTAAT	288	6	part of a conserved DNA module involved in light responsiveness
PdWRKY1	Box 4	ATTAAT	1071	6	part of a conserved DNA module involved in light responsiveness
PdWRKY1	Box 4	ATTAAT	1579	6	part of a conserved DNA module involved in light responsiveness
PdWRKY1	TCA	TCATCTTCAT	1871	9
PdWRKY1	TGACG-motif	TGACG	1019	5	cis-acting regulatory element involved in the MeJA-responsiveness
PdWRKY1	W box	TTGACC	136	6
PdWRKY1	W box	TTGACC	665	6
PdWRKY1	W box	TTGACC	1754	6
PdWRKY1	WRE3	CCACCT	1370	6
PdWRKY1	GATA-motif	AAGGATAAGG	641	9	part of a light responsive element
PdWRKY1	CCGTCC motif	CCGTCC	353	6
PdWRKY1	MYB-like sequence	TAACCA	1222	6
PdWRKY1	CTAG-motif	ACTAGCAGAA	1802	9
PdWRKY1	ARE	AAACCA	827	6	cis-acting regulatory element essential for the anaerobic induction
PdWRKY1	ARE	AAACCA	1447	6	cis-acting regulatory element essential for the anaerobic induction
PdWRKY1	ARE	AAACCA	1493	6	cis-acting regulatory element essential for the anaerobic induction
PdWRKY1	ARE	AAACCA	1927	6	cis-acting regulatory element essential for the anaerobic induction
PdWRKY1	TATA	TATAAAAT	1112	8
PdWRKY1	box S	AGCCACC	566	7
PdWRKY1	CGTCA-motif	CGTCA	1019	5	cis-acting regulatory element involved in the MeJA-responsiveness
PdWRKY1		motif_sequence	256	4	short_function
PdWRKY1		motif_sequence	577	4	short_function
PdWRKY1		motif_sequence	736	4	short_function
PdWRKY1		motif_sequence	808	4	short_function
PdWRKY1		motif_sequence	1004	4	short_function
PdWRKY1		motif_sequence	1133	4	short_function
PdWRKY1		motif_sequence	1281	4	short_function
PdWRKY1		motif_sequence	1306	4	short_function
PdWRKY1		motif_sequence	1321	4	short_function
PdWRKY1		motif_sequence	1705	4	short_function
PdWRKY1		motif_sequence	1734	4	short_function
PdWRKY1		motif_sequence	1873	4	short_function
PdWRKY1		motif_sequence	1887	4	short_function
PdWRKY1		motif_sequence	1933	4	short_function
PdWRKY1	G-Box	CACGTT	509	6	cis-acting regulatory element involved in light responsiveness
PdWRKY1	ABRE	AACCCGG	427	7	cis-acting element involved in the abscisic acid responsiveness
PdWRKY1	ABRE	ACGTG	509	5	cis-acting element involved in the abscisic acid responsiveness
PdWRKY1	CCGTCC-box	CCGTCC	353	6
PdWRKY1	Unnamed__1	CGTGG	185	5
PdWRKY1	Unnamed__1	CGTGG	523	5
PdWRKY1	Unnamed__1	CGTGG	548	5
PdWRKY1	Unnamed__1	CGTGG	636	5
PdWRKY1	TCT-motif	TCTTAC	197	6	part of a light responsive element
PdWRKY1	TCT-motif	TCTTAC	588	6	part of a light responsive element
PdWRKY1	LTR	CCGAAA	245	6	cis-acting element involved in low-temperature responsiveness
PdWRKY1	MBS	CAACTG	1344	6	MYB binding site involved in drought-inducibility
PdWRKY1	chs-CMA2b	GAACCTACACAC	1094	11	part of a light responsive element
PdWRKY1	G-box	TAAACGTG	509	8	cis-acting regulatory element involved in light responsiveness
PdWRKY1	G-box	CACGAC	521	6	cis-acting regulatory element involved in light responsiveness
PdWRKY1	ACE	CTAACGTATT	897	9	cis-acting element involved in light responsiveness
PdWRKY1	STRE	AGGGG	192	5
PdWRKY1	STRE	AGGGG	554	5
PdWRKY1	STRE	AGGGG	1813	5
PdWRKY1	CCAAT-box	CAACGG	329	6	MYBHv1 binding site
PdWRKY1	CCAAT-box	CAACGG	913	6	MYBHv1 binding site
PdWRKY1	CCAAT-box	CAACGG	1940	6	MYBHv1 binding site
PdWRKY1	CAAT-box	CAAT	37	4
PdWRKY1	CAAT-box	CAAT	139	4
PdWRKY1	CAAT-box	CAAT	147	4
PdWRKY1	CAAT-box	CAAT	153	4
PdWRKY1	CAAT-box	CAAAT	170	5	common cis-acting element in promoter and enhancer regions
PdWRKY1	CAAT-box	CAAAT	217	5	common cis-acting element in promoter and enhancer regions
PdWRKY1	CAAT-box	CAAAT	542	5	common cis-acting element in promoter and enhancer regions
PdWRKY1	CAAT-box	CAAAT	618	5	common cis-acting element in promoter and enhancer regions
PdWRKY1	CAAT-box	CAAT	632	4
PdWRKY1	CAAT-box	CCAAT	662	5	common cis-acting element in promoter and enhancer regions
PdWRKY1	CAAT-box	CAAAT	668	5	common cis-acting element in promoter and enhancer regions
PdWRKY1	CAAT-box	CAAAT	720	5	common cis-acting element in promoter and enhancer regions
PdWRKY1	CAAT-box	CAAAT	730	5	common cis-acting element in promoter and enhancer regions
PdWRKY1	CAAT-box	CAAT	733	4
PdWRKY1	CAAT-box	CAAT	792	4
PdWRKY1	CAAT-box	CAAT	813	4
PdWRKY1	CAAT-box	CAAT	853	4
PdWRKY1	CAAT-box	CAAAT	953	5	common cis-acting element in promoter and enhancer regions
PdWRKY1	CAAT-box	CAAAT	1024	5	common cis-acting element in promoter and enhancer regions
PdWRKY1	CAAT-box	CAAT	1066	4
PdWRKY1	CAAT-box	CAAAT	1122	5	common cis-acting element in promoter and enhancer regions
PdWRKY1	CAAT-box	CAAAT	1195	5	common cis-acting element in promoter and enhancer regions
PdWRKY1	CAAT-box	CAAT	1227	4
PdWRKY1	CAAT-box	CAAT	1248	4
PdWRKY1	CAAT-box	CCAAT	1255	5	common cis-acting element in promoter and enhancer regions
PdWRKY1	CAAT-box	CAAAT	1278	5	common cis-acting element in promoter and enhancer regions
PdWRKY1	CAAT-box	CAAAT	1315	5	common cis-acting element in promoter and enhancer regions
PdWRKY1	CAAT-box	CCAAT	1450	5	common cis-acting element in promoter and enhancer regions
PdWRKY1	CAAT-box	CAAT	1451	4
PdWRKY1	CAAT-box	CAAAT	1502	5	common cis-acting element in promoter and enhancer regions
PdWRKY1	CAAT-box	CAAAT	1606	5	common cis-acting element in promoter and enhancer regions
PdWRKY1	CAAT-box	CAAT	1703	4
PdWRKY1	CAAT-box	CAAT	1710	4
PdWRKY1	CAAT-box	CAAT	1743	4
PdWRKY1	CAAT-box	CAAT	1745	4
PdWRKY1	CAAT-box	CAAAT	1752	5	common cis-acting element in promoter and enhancer regions
PdWRKY1	CAAT-box	CAAAT	1760	5	common cis-acting element in promoter and enhancer regions
PdWRKY1	CAAT-box	CAAT	1777	4
PdWRKY1	CAAT-box	CCAAT	1930	5	common cis-acting element in promoter and enhancer regions
PdWRKY1	CAAT-box	CAAT	1931	4
PdWRKY1	A-box	CCGTCC	353	6	cis-acting regulatory element
PdWRKY1	AAGAA-motif	GAAAGAA	583	7
PdWRKY2	AT~TATA-box	TATATA	351	6
PdWRKY2	AT~TATA-box	TATATA	846	6
PdWRKY2	MYC	CATTTG	86	6
PdWRKY2	MYC	CATTTG	280	6
PdWRKY2	MYC	CATGTG	378	6
PdWRKY2	MYC	CATTTG	888	6
PdWRKY2	MYC	CATTTG	1061	6
PdWRKY2	MYC	CATGTG	1382	6
PdWRKY2	MYC	CATGTG	1391	6
PdWRKY2	MYC	CATGTG	1733	6
PdWRKY2	GT1-motif	GGTTAA	942	6	light responsive element
PdWRKY2	GT1-motif	GGTTAAT	1284	7	light responsive element
PdWRKY2	GT1-motif	GGTTAA	1285	6	light responsive element
PdWRKY2	AT-rich element	ATAGAAATCAA	1482	10	binding site of AT-rich DNA binding protein (ATBP-1)
PdWRKY2	CAT-box	GCCACT	916	6	cis-acting regulatory element related to meristem expression
PdWRKY2	ARE	AAACCA	684	6	cis-acting regulatory element essential for the anaerobic induction
PdWRKY2	CGTCA-motif	CGTCA	19	5	cis-acting regulatory element involved in the MeJA-responsiveness
PdWRKY2	CGTCA-motif	CGTCA	27	5	cis-acting regulatory element involved in the MeJA-responsiveness
PdWRKY2		motif_sequence	94	4	short_function
PdWRKY2		motif_sequence	379	4	short_function
PdWRKY2		motif_sequence	616	4	short_function
PdWRKY2		motif_sequence	1024	4	short_function
PdWRKY2		motif_sequence	1135	4	short_function
PdWRKY2		motif_sequence	1368	4	short_function
PdWRKY2		motif_sequence	1392	4	short_function
PdWRKY2		motif_sequence	1452	4	short_function
PdWRKY2		motif_sequence	1732	4	short_function
PdWRKY2		motif_sequence	1742	4	short_function
PdWRKY2		motif_sequence	1984	4	short_function
PdWRKY2	ABRE	CGCACGTGTC	431	9	cis-acting element involved in the abscisic acid responsiveness
PdWRKY2	ABRE	CACGTG	433	6	cis-acting element involved in the abscisic acid responsiveness
PdWRKY2	ABRE	ACGTG	434	5	cis-acting element involved in the abscisic acid responsiveness
PdWRKY2	ABRE	GACACGTGGC	1380	9	cis-acting element involved in the abscisic acid responsiveness
PdWRKY2	ABRE	GACACGTGGC	1769	9	cis-acting element involved in the abscisic acid responsiveness
PdWRKY2	ABRE	CACGTG	1771	6	cis-acting element involved in the abscisic acid responsiveness
PdWRKY2	ABRE	ACGTG	1772	5	cis-acting element involved in the abscisic acid responsiveness
PdWRKY2	ABRE	GCAACGTGTC	1964	9	cis-acting element involved in the abscisic acid responsiveness
PdWRKY2	ABRE	CACGTG	1966	6	cis-acting element involved in the abscisic acid responsiveness
PdWRKY2	ABRE	ACGTG	1967	5	cis-acting element involved in the abscisic acid responsiveness
PdWRKY2	G-Box	CACGTG	433	6	cis-acting regulatory element involved in light responsiveness
PdWRKY2	G-Box	CACGTG	1771	6	cis-acting regulatory element involved in light responsiveness
PdWRKY2	G-Box	CACGTG	1966	6	cis-acting regulatory element involved in light responsiveness
PdWRKY2	CCGTCC-box	CCGTCC	1925	6
PdWRKY2	TATA-box	TATA	115	4	core promoter element around -30 of transcription start
PdWRKY2	TATA-box	TATA	153	4	core promoter element around -30 of transcription start
PdWRKY2	TATA-box	ATATAT	350	6	core promoter element around -30 of transcription start
PdWRKY2	TATA-box	TATATA	351	6	core promoter element around -30 of transcription start
PdWRKY2	TATA-box	ATATAT	352	6	core promoter element around -30 of transcription start
PdWRKY2	TATA-box	TATA	353	4	core promoter element around -30 of transcription start
PdWRKY2	TATA-box	TACAAAA	747	7	core promoter element around -30 of transcription start
PdWRKY2	TATA-box	TATACA	844	6	core promoter element around -30 of transcription start
PdWRKY2	TATA-box	TATATA	846	6	core promoter element around -30 of transcription start
PdWRKY2	TATA-box	ATATAT	847	6	core promoter element around -30 of transcription start
PdWRKY2	TATA-box	TATA	848	4	core promoter element around -30 of transcription start
PdWRKY2	TATA-box	ATATAA	1112	6	core promoter element around -30 of transcription start
PdWRKY2	TATA-box	TATA	1113	4	core promoter element around -30 of transcription start
PdWRKY2	TATA-box	TATA	1165	4	core promoter element around -30 of transcription start
PdWRKY2	TATA-box	ATTATA	1189	6	core promoter element around -30 of transcription start
PdWRKY2	TATA-box	TATAA	1190	5	core promoter element around -30 of transcription start
PdWRKY2	TATA-box	TATA	1191	4	core promoter element around -30 of transcription start
PdWRKY2	TATA-box	ATATAT	1726	6	core promoter element around -30 of transcription start
PdWRKY2	TATA-box	TATA	1727	4	core promoter element around -30 of transcription start
PdWRKY2	MYB recognition site	CCGTTG	1154	6
PdWRKY2	Unnamed__1	CGTGG	435	5
PdWRKY2	Unnamed__1	GAATTTAATTAA	715	11	60K protein binding site
PdWRKY2	Unnamed__1	CGTGG	1770	5
PdWRKY2	Unnamed__1	GCCACGTGGC	1964	9
PdWRKY2	Unnamed__1	CGTGG	1968	5
PdWRKY2	MYB	CAACCA	955	6
PdWRKY2	RY-element	CATGCATG	1735	8	cis-acting regulatory element involved in seed-specific regulation
PdWRKY2	TCT-motif	TCTTAC	1426	6	part of a light responsive element
PdWRKY2	as-1	TGACG	19	5
PdWRKY2	as-1	TGACG	27	5
PdWRKY2	ERE	ATTTTAAA	464	8
PdWRKY2	ERE	ATTTTAAA	474	8
PdWRKY2	ERE	ATTTTAAA	538	8
PdWRKY2	Unnamed__4	CTCC	612	4
PdWRKY2	Unnamed__4	CTCC	1026	4
PdWRKY2	Unnamed__4	CTCC	1124	4
PdWRKY2	Unnamed__4	CTCC	1213	4
PdWRKY2	Unnamed__4	CTCC	1221	4
PdWRKY2	Unnamed__4	CTCC	1297	4
PdWRKY2	Unnamed__4	CTCC	1584	4
PdWRKY2	Unnamed__4	CTCC	1784	4
PdWRKY2	Unnamed__4	CTCC	1980	4
PdWRKY2	G-box	tgACACGTGGCA	430	11	cis-acting regulatory element involved in light responsiveness
PdWRKY2	G-box	CACGTG	433	6	cis-acting regulatory element involved in light responsiveness
PdWRKY2	G-box	CACGAC	690	6	cis-acting regulatory element involved in light responsiveness
PdWRKY2	G-box	ACACGTGGC	1769	9	cis-acting regulatory element involved in light responsiveness
PdWRKY2	G-box	CACGTG	1771	6	cis-acting regulatory element involved in light responsiveness
PdWRKY2	G-box	ACACGTGGC	1965	9	cis-acting regulatory element involved in light responsiveness
PdWRKY2	G-box	CACGTG	1966	6	cis-acting regulatory element involved in light responsiveness
PdWRKY2	MRE	AACCTAA	1340	7	MYB binding site involved in light responsiveness
PdWRKY2	Box 4	ATTAAT	78	6	part of a conserved DNA module involved in light responsiveness
PdWRKY2	Box 4	ATTAAT	102	6	part of a conserved DNA module involved in light responsiveness
PdWRKY2	Box 4	ATTAAT	969	6	part of a conserved DNA module involved in light responsiveness
PdWRKY2	Box 4	ATTAAT	1245	6	part of a conserved DNA module involved in light responsiveness
PdWRKY2	Box 4	ATTAAT	1911	6	part of a conserved DNA module involved in light responsiveness
PdWRKY2	STRE	AGGGG	660	5
PdWRKY2	STRE	AGGGG	1871	5
PdWRKY2	CCAAT-box	CAACGG	1154	6	MYBHv1 binding site
PdWRKY2	W box	TTGACC	1847	6
PdWRKY2	TGACG-motif	TGACG	19	5	cis-acting regulatory element involved in the MeJA-responsiveness
PdWRKY2	TGACG-motif	TGACG	27	5	cis-acting regulatory element involved in the MeJA-responsiveness
PdWRKY2	TC-rich repeats	GTTTTCTTAC	1089	9	cis-acting element involved in defense and stress responsiveness
PdWRKY2	A-box	CCGTCC	1925	6	cis-acting regulatory element
PdWRKY2	Unnamed__2	AACCTAACCT	1337	9
PdWRKY2	CAAT-box	CAAT	23	4
PdWRKY2	CAAT-box	CAAT	54	4
PdWRKY2	CAAT-box	CAAAT	87	5	common cis-acting element in promoter and enhancer regions
PdWRKY2	CAAT-box	CAAT	146	4
PdWRKY2	CAAT-box	CAAT	264	4
PdWRKY2	CAAT-box	CAAAT	280	5	common cis-acting element in promoter and enhancer regions
PdWRKY2	CAAT-box	CAAT	293	4
PdWRKY2	CAAT-box	CAAT	340	4
PdWRKY2	CAAT-box	CAAAT	427	5	common cis-acting element in promoter and enhancer regions
PdWRKY2	CAAT-box	CAAT	481	4
PdWRKY2	CAAT-box	CCAAT	505	5	common cis-acting element in promoter and enhancer regions
PdWRKY2	CAAT-box	CAAAT	570	5	common cis-acting element in promoter and enhancer regions
PdWRKY2	CAAT-box	CAAT	634	4
PdWRKY2	CAAT-box	CAAT	695	4
PdWRKY2	CAAT-box	CAAT	742	4
PdWRKY2	CAAT-box	CAAT	881	4
PdWRKY2	CAAT-box	CAAAT	888	5	common cis-acting element in promoter and enhancer regions
PdWRKY2	CAAT-box	CCAAT	958	5	common cis-acting element in promoter and enhancer regions
PdWRKY2	CAAT-box	CAAT	959	4
PdWRKY2	CAAT-box	CAAT	1022	4
PdWRKY2	CAAT-box	CAAT	1046	4
PdWRKY2	CAAT-box	CAAAT	1061	5	common cis-acting element in promoter and enhancer regions
PdWRKY2	CAAT-box	CAAT	1131	4
PdWRKY2	CAAT-box	CAAT	1147	4
PdWRKY2	CAAT-box	CAAAT	1273	5	common cis-acting element in promoter and enhancer regions
PdWRKY2	CAAT-box	CAAAT	1360	5	common cis-acting element in promoter and enhancer regions
PdWRKY2	CAAT-box	CAAAT	1414	5	common cis-acting element in promoter and enhancer regions
PdWRKY2	CAAT-box	CAAT	1432	4
PdWRKY2	CAAT-box	CAAAT	1530	5	common cis-acting element in promoter and enhancer regions
PdWRKY2	CAAT-box	CAAT	1539	4
PdWRKY2	CAAT-box	CAAT	1698	4
PdWRKY2	CAAT-box	CAAT	1715	4
PdWRKY2	CAAT-box	CAAAT	1810	5	common cis-acting element in promoter and enhancer regions
PdWRKY2	CAAT-box	CAAT	1909	4
PdWRKY2	CCGTCC motif	CCGTCC	1925	6
PdWRKY2	AAGAA-motif	gGTAAAGAAA	188	9
PdWRKY2	AAGAA-motif	gGTAAAGAAA	893	9
PdWRKY3	TATA	TATAAAAT	1019	8
PdWRKY3	TATA	TATAAAAT	1029	8
PdWRKY3	ARE	AAACCA	418	6	cis-acting regulatory element essential for the anaerobic induction
PdWRKY3	ARE	AAACCA	1735	6	cis-acting regulatory element essential for the anaerobic induction
PdWRKY3	circadian	CAAAGATATC	911	9	cis-acting regulatory element involved in circadian control
PdWRKY3	MYB-like sequence	TAACCA	16	6
PdWRKY3	AT~TATA-box	TATATA	34	6
PdWRKY3	AT~TATA-box	TATATA	36	6
PdWRKY3	AT~TATA-box	TATATA	206	6
PdWRKY3	AT~TATA-box	TATATA	208	6
PdWRKY3	AT~TATA-box	TATATA	641	6
PdWRKY3	AT~TATA-box	TATATA	982	6
PdWRKY3	AT~TATA-box	TATATA	1007	6
PdWRKY3	AT~TATA-box	TATATA	1175	6
PdWRKY3	AT~TATA-box	TATATA	1212	6
PdWRKY3	AT~TATA-box	TATATA	1214	6
PdWRKY3	AT~TATA-box	TATATA	1216	6
PdWRKY3	AT~TATA-box	TATATA	1218	6
PdWRKY3	AT~TATA-box	TATATA	1220	6
PdWRKY3	AT~TATA-box	TATATA	1222	6
PdWRKY3	AT~TATA-box	TATATA	1224	6
PdWRKY3	AT~TATA-box	TATATA	1226	6
PdWRKY3	AT~TATA-box	TATATA	1589	6
PdWRKY3	AT~TATA-box	TATATA	1597	6
PdWRKY3	AT~TATA-box	TATATA	1599	6
PdWRKY3	AT~TATA-box	TATATA	1651	6
PdWRKY3	AT~TATA-box	TATATA	1653	6
PdWRKY3	AT~TATA-box	TATATA	1851	6
PdWRKY3	MYC	CATGTG	445	6
PdWRKY3	MYC	CATTTG	529	6
PdWRKY3	MYC	CATTTG	1184	6
PdWRKY3	MYC	CATGTG	1489	6
PdWRKY3	MYC	CATGTG	1605	6
PdWRKY3	GT1-motif	GGTTAA	15	6	light responsive element
PdWRKY3	GT1-motif	GGTTAA	1577	6	light responsive element
PdWRKY3	GT1-motif	GGTTAA	1720	6	light responsive element
PdWRKY3	Myb-binding site	CAACAG	613	6
PdWRKY3	Myb-binding site	CAACAG	1464	6
PdWRKY3	GARE-motif	TCTGTTG	1464	7	gibberellin-responsive element
PdWRKY3	Box II -like sequence	TCCGTGTACCA	63	10	cis-acting regulatory element
PdWRKY3	RY-element	CATGCATG	762	8	cis-acting regulatory element involved in seed-specific regulation
PdWRKY3	G-Box	CACGTG	311	6	cis-acting regulatory element involved in light responsiveness
PdWRKY3		motif_sequence	65	4	short_function
PdWRKY3		motif_sequence	166	4	short_function
PdWRKY3		motif_sequence	283	4	short_function
PdWRKY3		motif_sequence	334	4	short_function
PdWRKY3		motif_sequence	470	4	short_function
PdWRKY3		motif_sequence	521	4	short_function
PdWRKY3		motif_sequence	631	4	short_function
PdWRKY3		motif_sequence	636	4	short_function
PdWRKY3		motif_sequence	671	4	short_function
PdWRKY3		motif_sequence	713	4	short_function
PdWRKY3		motif_sequence	771	4	short_function
PdWRKY3		motif_sequence	776	4	short_function
PdWRKY3		motif_sequence	786	4	short_function
PdWRKY3		motif_sequence	1181	4	short_function
PdWRKY3		motif_sequence	1266	4	short_function
PdWRKY3		motif_sequence	1355	4	short_function
PdWRKY3		motif_sequence	1388	4	short_function
PdWRKY3		motif_sequence	1492	4	short_function
PdWRKY3	ABRE	CGCACGTGTC	309	9	cis-acting element involved in the abscisic acid responsiveness
PdWRKY3	ABRE	CACGTG	311	6	cis-acting element involved in the abscisic acid responsiveness
PdWRKY3	ABRE	ACGTG	312	5	cis-acting element involved in the abscisic acid responsiveness
PdWRKY3	ABRE	ACGTG	1869	5	cis-acting element involved in the abscisic acid responsiveness
PdWRKY3	4cl-CMA2b	TCTCACCAACCACA	412	13	light responsive element
PdWRKY3	TATA-box	TATATAA	33	7	core promoter element around -30 of transcription start
PdWRKY3	TATA-box	TATATA	34	6	core promoter element around -30 of transcription start
PdWRKY3	TATA-box	ATATAT	35	6	core promoter element around -30 of transcription start
PdWRKY3	TATA-box	TATATA	36	6	core promoter element around -30 of transcription start
PdWRKY3	TATA-box	ATATAT	37	6	core promoter element around -30 of transcription start
PdWRKY3	TATA-box	TATA	38	4	core promoter element around -30 of transcription start
PdWRKY3	TATA-box	ATATAT	205	6	core promoter element around -30 of transcription start
PdWRKY3	TATA-box	TATATA	206	6	core promoter element around -30 of transcription start
PdWRKY3	TATA-box	ATATAT	207	6	core promoter element around -30 of transcription start
PdWRKY3	TATA-box	TATATA	208	6	core promoter element around -30 of transcription start
PdWRKY3	TATA-box	ATATAA	209	6	core promoter element around -30 of transcription start
PdWRKY3	TATA-box	TATA	210	4	core promoter element around -30 of transcription start
PdWRKY3	TATA-box	ATATAT	294	6	core promoter element around -30 of transcription start
PdWRKY3	TATA-box	TATA	295	4	core promoter element around -30 of transcription start
PdWRKY3	TATA-box	ATATAA	402	6	core promoter element around -30 of transcription start
PdWRKY3	TATA-box	TATA	403	4	core promoter element around -30 of transcription start
PdWRKY3	TATA-box	ATATAT	458	6	core promoter element around -30 of transcription start
PdWRKY3	TATA-box	TATA	459	4	core promoter element around -30 of transcription start
PdWRKY3	TATA-box	ATATAT	640	6	core promoter element around -30 of transcription start
PdWRKY3	TATA-box	TATATA	641	6	core promoter element around -30 of transcription start
PdWRKY3	TATA-box	TATA	643	4	core promoter element around -30 of transcription start
PdWRKY3	TATA-box	TATACA	698	6	core promoter element around -30 of transcription start
PdWRKY3	TATA-box	TATA	700	4	core promoter element around -30 of transcription start
PdWRKY3	TATA-box	TATA	804	4	core promoter element around -30 of transcription start
PdWRKY3	TATA-box	TACAAAA	816	7	core promoter element around -30 of transcription start
PdWRKY3	TATA-box	ATATAT	914	6	core promoter element around -30 of transcription start
PdWRKY3	TATA-box	TATA	915	4	core promoter element around -30 of transcription start
PdWRKY3	TATA-box	ATATAT	981	6	core promoter element around -30 of transcription start
PdWRKY3	TATA-box	TATATA	982	6	core promoter element around -30 of transcription start
PdWRKY3	TATA-box	ATATAT	983	6	core promoter element around -30 of transcription start
PdWRKY3	TATA-box	TATA	984	4	core promoter element around -30 of transcription start
PdWRKY3	TATA-box	TATACA	1005	6	core promoter element around -30 of transcription start
PdWRKY3	TATA-box	TATATA	1007	6	core promoter element around -30 of transcription start
PdWRKY3	TATA-box	ATATAT	1008	6	core promoter element around -30 of transcription start
PdWRKY3	TATA-box	TATA	1009	4	core promoter element around -30 of transcription start
PdWRKY3	TATA-box	TATA	1019	4	core promoter element around -30 of transcription start
PdWRKY3	TATA-box	TATA	1029	4	core promoter element around -30 of transcription start
PdWRKY3	TATA-box	ccTATAAAaa	1074	9	core promoter element around -30 of transcription start
PdWRKY3	TATA-box	TATACA	1141	6	core promoter element around -30 of transcription start
PdWRKY3	TATA-box	TATA	1143	4	core promoter element around -30 of transcription start
PdWRKY3	TATA-box	ATATAT	1174	6	core promoter element around -30 of transcription start
PdWRKY3	TATA-box	TATATA	1175	6	core promoter element around -30 of transcription start
PdWRKY3	TATA-box	TATA	1177	4	core promoter element around -30 of transcription start
PdWRKY3	TATA-box	ATATAA	1191	6	core promoter element around -30 of transcription start
PdWRKY3	TATA-box	TATA	1192	4	core promoter element around -30 of transcription start
PdWRKY3	TATA-box	ATATAT	1211	6	core promoter element around -30 of transcription start
PdWRKY3	TATA-box	TATATA	1212	6	core promoter element around -30 of transcription start
PdWRKY3	TATA-box	ATATAT	1213	6	core promoter element around -30 of transcription start
PdWRKY3	TATA-box	TATATA	1214	6	core promoter element around -30 of transcription start
PdWRKY3	TATA-box	ATATAT	1215	6	core promoter element around -30 of transcription start
PdWRKY3	TATA-box	TATATA	1216	6	core promoter element around -30 of transcription start
PdWRKY3	TATA-box	ATATAT	1217	6	core promoter element around -30 of transcription start
PdWRKY3	TATA-box	TATATA	1218	6	core promoter element around -30 of transcription start
PdWRKY3	TATA-box	ATATAT	1219	6	core promoter element around -30 of transcription start
PdWRKY3	TATA-box	TATATA	1220	6	core promoter element around -30 of transcription start
PdWRKY3	TATA-box	ATATAT	1221	6	core promoter element around -30 of transcription start
PdWRKY3	TATA-box	TATATA	1222	6	core promoter element around -30 of transcription start
PdWRKY3	TATA-box	ATATAT	1223	6	core promoter element around -30 of transcription start
PdWRKY3	TATA-box	TATATA	1224	6	core promoter element around -30 of transcription start
PdWRKY3	TATA-box	ATATAT	1225	6	core promoter element around -30 of transcription start
PdWRKY3	TATA-box	TATATA	1226	6	core promoter element around -30 of transcription start
PdWRKY3	TATA-box	ATATAT	1227	6	core promoter element around -30 of transcription start
PdWRKY3	TATA-box	TATA	1228	4	core promoter element around -30 of transcription start
PdWRKY3	TATA-box	ATATAT	1588	6	core promoter element around -30 of transcription start
PdWRKY3	TATA-box	TATATA	1589	6	core promoter element around -30 of transcription start
PdWRKY3	TATA-box	TATA	1591	4	core promoter element around -30 of transcription start
PdWRKY3	TATA-box	ATATAT	1596	6	core promoter element around -30 of transcription start
PdWRKY3	TATA-box	TATATA	1597	6	core promoter element around -30 of transcription start
PdWRKY3	TATA-box	ATATAT	1598	6	core promoter element around -30 of transcription start
PdWRKY3	TATA-box	TATATA	1599	6	core promoter element around -30 of transcription start
PdWRKY3	TATA-box	TATA	1601	4	core promoter element around -30 of transcription start
PdWRKY3	TATA-box	TATAAATA	1624	8	core promoter element around -30 of transcription start
PdWRKY3	TATA-box	TATAAAT	1625	7	core promoter element around -30 of transcription start
PdWRKY3	TATA-box	TATAAA	1626	6	core promoter element around -30 of transcription start
PdWRKY3	TATA-box	TATAA	1627	5	core promoter element around -30 of transcription start
PdWRKY3	TATA-box	TATA	1628	4	core promoter element around -30 of transcription start
PdWRKY3	TATA-box	ATATAT	1650	6	core promoter element around -30 of transcription start
PdWRKY3	TATA-box	TATATA	1651	6	core promoter element around -30 of transcription start
PdWRKY3	TATA-box	ATATAT	1652	6	core promoter element around -30 of transcription start
PdWRKY3	TATA-box	TATATA	1653	6	core promoter element around -30 of transcription start
PdWRKY3	TATA-box	TATA	1655	4	core promoter element around -30 of transcription start
PdWRKY3	TATA-box	TATA	1701	4	core promoter element around -30 of transcription start
PdWRKY3	TATA-box	TATATA	1851	6	core promoter element around -30 of transcription start
PdWRKY3	TATA-box	ATATAT	1852	6	core promoter element around -30 of transcription start
PdWRKY3	TATA-box	TATA	1853	4	core promoter element around -30 of transcription start
PdWRKY3	TATA-box	TATAAAA	1992	7	core promoter element around -30 of transcription start
PdWRKY3	TATA-box	TATAAA	1993	6	core promoter element around -30 of transcription start
PdWRKY3	TATA-box	TATAA	1994	5	core promoter element around -30 of transcription start
PdWRKY3	TATA-box	TATA	1995	4	core promoter element around -30 of transcription start
PdWRKY3	ABRE4	CACGTA	1868	6
PdWRKY3	Unnamed__1	CGTGG	310	5
PdWRKY3	Unnamed__1	CGTGG	1553	5
PdWRKY3	MYB	TAACCA	16	6
PdWRKY3	MYB	CAACAG	613	6
PdWRKY3	MYB	CAACAG	1464	6
PdWRKY3	MYB	CAACCA	1739	6
PdWRKY3	Myb	CAACTG	20	6
PdWRKY3	Myb	TAACTG	148	6
PdWRKY3	Myb	CAACTG	495	6
PdWRKY3	Myb	TAACTG	610	6
PdWRKY3	Myb	CAACTG	1743	6
PdWRKY3	ERE	ATTTTAAA	1644	8
PdWRKY3	TCA-element	CCATCTTTTT	1986	9	cis-acting element involved in salicylic acid responsiveness
PdWRKY3	ABRE3a	TACGTG	1868	6
PdWRKY3	Unnamed__4	CTCC	166	4
PdWRKY3	Unnamed__4	CTCC	778	4
PdWRKY3	Unnamed__4	CTCC	937	4
PdWRKY3	Unnamed__4	CTCC	962	4
PdWRKY3	Unnamed__4	CTCC	1298	4
PdWRKY3	Unnamed__4	CTCC	1423	4
PdWRKY3	Unnamed__4	CTCC	1516	4
PdWRKY3	Unnamed__4	CTCC	1913	4
PdWRKY3	O2-site	GATGA(C/T)(A/G)TG(A/G)	1114	8	cis-acting regulatory element involved in zein metabolism regulation
PdWRKY3	G-box	CACGAC	175	6	cis-acting regulatory element involved in light responsiveness
PdWRKY3	G-box	CACGTG	311	6	cis-acting regulatory element involved in light responsiveness
PdWRKY3	G-box	TACGTG	1868	6	cis-acting regulatory element involved in light responsiveness
PdWRKY3	LTR	CCGAAA	957	6	cis-acting element involved in low-temperature responsiveness
PdWRKY3	MBS	CAACTG	20	6	MYB binding site involved in drought-inducibility
PdWRKY3	MBS	CAACTG	495	6	MYB binding site involved in drought-inducibility
PdWRKY3	MBS	CAACTG	1743	6	MYB binding site involved in drought-inducibility
PdWRKY3	WRE3	CCACCT	1071	6
PdWRKY3	WRE3	CCACCT	1986	6
PdWRKY3	CAAT-box	CAAAT	41	5	common cis-acting element in promoter and enhancer regions
PdWRKY3	CAAT-box	CCAAT	101	5	common cis-acting element in promoter and enhancer regions
PdWRKY3	CAAT-box	CAAT	298	4
PdWRKY3	CAAT-box	CAAT	320	4
PdWRKY3	CAAT-box	CAAT	367	4
PdWRKY3	CAAT-box	CAAAT	430	5	common cis-acting element in promoter and enhancer regions
PdWRKY3	CAAT-box	CAAT	436	4
PdWRKY3	CAAT-box	CAAT	441	4
PdWRKY3	CAAT-box	CAAAT	530	5	common cis-acting element in promoter and enhancer regions
PdWRKY3	CAAT-box	CAAT	593	4
PdWRKY3	CAAT-box	CAAT	625	4
PdWRKY3	CAAT-box	CCAAT	659	5	common cis-acting element in promoter and enhancer regions
PdWRKY3	CAAT-box	CAAT	660	4
PdWRKY3	CAAT-box	CCAAT	677	5	common cis-acting element in promoter and enhancer regions
PdWRKY3	CAAT-box	CAAAT	797	5	common cis-acting element in promoter and enhancer regions
PdWRKY3	CAAT-box	CCAAT	811	5	common cis-acting element in promoter and enhancer regions
PdWRKY3	CAAT-box	CAAT	812	4
PdWRKY3	CAAT-box	CAAAT	829	5	common cis-acting element in promoter and enhancer regions
PdWRKY3	CAAT-box	CAAAT	911	5	common cis-acting element in promoter and enhancer regions
PdWRKY3	CAAT-box	CAAAT	1118	5	common cis-acting element in promoter and enhancer regions
PdWRKY3	CAAT-box	CAAAT	1125	5	common cis-acting element in promoter and enhancer regions
PdWRKY3	CAAT-box	CAAT	1164	4
PdWRKY3	CAAT-box	CAAT	1172	4
PdWRKY3	CAAT-box	CAAAT	1185	5	common cis-acting element in promoter and enhancer regions
PdWRKY3	CAAT-box	CAAAT	1313	5	common cis-acting element in promoter and enhancer regions
PdWRKY3	CAAT-box	CAAT	1327	4
PdWRKY3	CAAT-box	CAAT	1360	4
PdWRKY3	CAAT-box	CAAAT	1436	5	common cis-acting element in promoter and enhancer regions
PdWRKY3	CAAT-box	CAAT	1535	4
PdWRKY3	CAAT-box	CAAT	1570	4
PdWRKY3	CAAT-box	CAAAT	1639	5	common cis-acting element in promoter and enhancer regions
PdWRKY3	CAAT-box	CAAAT	1684	5	common cis-acting element in promoter and enhancer regions
PdWRKY3	CAAT-box	CAAAT	1726	5	common cis-acting element in promoter and enhancer regions
PdWRKY3	CAAT-box	CAAT	1859	4
PdWRKY3	CAAT-box	CAAAT	1898	5	common cis-acting element in promoter and enhancer regions
PdWRKY3	CAAT-box	CCAAT	1960	5	common cis-acting element in promoter and enhancer regions
PdWRKY3	CAAT-box	CAAT	1961	4
PdWRKY3	GATA-motif	GATAGGA	162	7	part of a light responsive element
PdWRKY3	AAGAA-motif	GAAAGAA	823	7
PdWRKY3	AAGAA-motif	gGTAAAGAAA	1839	9
PdWRKY3	MRE	AACCTAA	862	7	MYB binding site involved in light responsiveness
PdWRKY3	P-box	CCTTTTG	1405	7	gibberellin-responsive element
PdWRKY3	Box 4	ATTAAT	97	6	part of a conserved DNA module involved in light responsiveness
PdWRKY3	STRE	AGGGG	563	5
PdWRKY3	STRE	AGGGG	1294	5
PdWRKY3	TCA	TCATCTTCAT	711	9
PdWRKY3	TCA	TCATCTTCAT	1264	9
PdWRKY3	TC-rich repeats	ATTCTCTAAC	286	9	cis-acting element involved in defense and stress responsiveness
PdWRKY3	W box	TTGACC	534	6
PdWRKY3	W box	TTGACC	1067	6
PdWRKY3	W box	TTGACC	1730	6
PdWRKY4	TGACG-motif	TGACG	83	5	cis-acting regulatory element involved in the MeJA-responsiveness
PdWRKY4	TGACG-motif	TGACG	873	5	cis-acting regulatory element involved in the MeJA-responsiveness
PdWRKY4	TGACG-motif	TGACG	1465	5	cis-acting regulatory element involved in the MeJA-responsiveness
PdWRKY4	TGACG-motif	TGACG	1589	5	cis-acting regulatory element involved in the MeJA-responsiveness
PdWRKY4	TGACG-motif	TGACG	1640	5	cis-acting regulatory element involved in the MeJA-responsiveness
PdWRKY4	TC-rich repeats	ATTCTCTAAC	87	9	cis-acting element involved in defense and stress responsiveness
PdWRKY4	TCA	TCATCTTCAT	240	9
PdWRKY4	W box	TTGACC	1204	6
PdWRKY4	W box	TTGACC	1605	6
PdWRKY4	STRE	AGGGG	1504	5
PdWRKY4	STRE	AGGGG	1552	5
PdWRKY4	Box 4	ATTAAT	197	6	part of a conserved DNA module involved in light responsiveness
PdWRKY4	Box 4	ATTAAT	630	6	part of a conserved DNA module involved in light responsiveness
PdWRKY4	Box 4	ATTAAT	847	6	part of a conserved DNA module involved in light responsiveness
PdWRKY4	Box 4	ATTAAT	1114	6	part of a conserved DNA module involved in light responsiveness
PdWRKY4	CAAT-box	CAAT	6	4
PdWRKY4	CAAT-box	CAAT	11	4
PdWRKY4	CAAT-box	CAAAT	52	5	common cis-acting element in promoter and enhancer regions
PdWRKY4	CAAT-box	CAAAT	122	5	common cis-acting element in promoter and enhancer regions
PdWRKY4	CAAT-box	CAAAT	140	5	common cis-acting element in promoter and enhancer regions
PdWRKY4	CAAT-box	CAAT	150	4
PdWRKY4	CAAT-box	CAAT	185	4
PdWRKY4	CAAT-box	CCAAT	201	5	common cis-acting element in promoter and enhancer regions
PdWRKY4	CAAT-box	CAAT	557	4
PdWRKY4	CAAT-box	CAAT	665	4
PdWRKY4	CAAT-box	CAAT	763	4
PdWRKY4	CAAT-box	CAAT	781	4
PdWRKY4	CAAT-box	CCAAT	814	5	common cis-acting element in promoter and enhancer regions
PdWRKY4	CAAT-box	CAAAT	851	5	common cis-acting element in promoter and enhancer regions
PdWRKY4	CAAT-box	CCAAT	886	5	common cis-acting element in promoter and enhancer regions
PdWRKY4	CAAT-box	CAAT	887	4
PdWRKY4	CAAT-box	CAAT	985	4
PdWRKY4	CAAT-box	CAAT	994	4
PdWRKY4	CAAT-box	CAAAT	1018	5	common cis-acting element in promoter and enhancer regions
PdWRKY4	CAAT-box	CAAT	1052	4
PdWRKY4	CAAT-box	CAAT	1072	4
PdWRKY4	CAAT-box	CAAT	1081	4
PdWRKY4	CAAT-box	CAAT	1083	4
PdWRKY4	CAAT-box	CAAAT	1144	5	common cis-acting element in promoter and enhancer regions
PdWRKY4	CAAT-box	CCAAT	1266	5	common cis-acting element in promoter and enhancer regions
PdWRKY4	CAAT-box	CAAAT	1284	5	common cis-acting element in promoter and enhancer regions
PdWRKY4	CAAT-box	CAAT	1304	4
PdWRKY4	CAAT-box	CAAAT	1306	5	common cis-acting element in promoter and enhancer regions
PdWRKY4	CAAT-box	CAAT	1325	4
PdWRKY4	CAAT-box	CAAT	1461	4
PdWRKY4	CAAT-box	CAAAT	1473	5	common cis-acting element in promoter and enhancer regions
PdWRKY4	CAAT-box	CAAAT	1545	5	common cis-acting element in promoter and enhancer regions
PdWRKY4	CAAT-box	CAAAT	1611	5	common cis-acting element in promoter and enhancer regions
PdWRKY4	CAAT-box	CAAT	1701	4
PdWRKY4	CAAT-box	CAAT	1711	4
PdWRKY4	CAAT-box	CAAT	1794	4
PdWRKY4	CAAT-box	CAAT	1799	4
PdWRKY4	CAAT-box	CAAAT	1816	5	common cis-acting element in promoter and enhancer regions
PdWRKY4	CAAT-box	CAAAT	1853	5	common cis-acting element in promoter and enhancer regions
PdWRKY4	CAAT-box	CAAAT	1872	5	common cis-acting element in promoter and enhancer regions
PdWRKY4	CAAT-box	CAAT	1899	4
PdWRKY4	CAAT-box	CAAAT	1973	5	common cis-acting element in promoter and enhancer regions
PdWRKY4	as-1	TGACG	83	5
PdWRKY4	as-1	TGACG	873	5
PdWRKY4	as-1	TGACG	1465	5
PdWRKY4	as-1	TGACG	1589	5
PdWRKY4	as-1	TGACG	1640	5
PdWRKY4	MBS	CAACTG	691	6	MYB binding site involved in drought-inducibility
PdWRKY4	MBS	CAACTG	1845	6	MYB binding site involved in drought-inducibility
PdWRKY4	LTR	CCGAAA	1149	6	cis-acting element involved in low-temperature responsiveness
PdWRKY4	I-box	TGATAATGT	1374	9	part of a light responsive element
PdWRKY4	G-box	CACGTG	495	6	cis-acting regulatory element involved in light responsiveness
PdWRKY4	G-box	TAACACGTAG	1378	9	cis-acting regulatory element involved in light responsiveness
PdWRKY4	G-box	TACGTG	1381	6	cis-acting regulatory element involved in light responsiveness
PdWRKY4	G-box	CACGAC	1634	6	cis-acting regulatory element involved in light responsiveness
PdWRKY4	ABRE3a	TACGTG	1381	6
PdWRKY4	Unnamed__4	CTCC	172	4
PdWRKY4	Unnamed__4	CTCC	403	4
PdWRKY4	Unnamed__4	CTCC	504	4
PdWRKY4	Unnamed__4	CTCC	592	4
PdWRKY4	Unnamed__4	CTCC	651	4
PdWRKY4	Unnamed__4	CTCC	1170	4
PdWRKY4	Unnamed__4	CTCC	1573	4
PdWRKY4	Unnamed__4	CTCC	1809	4
PdWRKY4	Unnamed__4	CTCC	1833	4
PdWRKY4	Unnamed__4	CTCC	1930	4
PdWRKY4	Unnamed__4	CTCC	1966	4
PdWRKY4	ERE	ATTTCATA	126	8
PdWRKY4	ERE	ATTTCATA	454	8
PdWRKY4	ERE	ATTTTAAA	617	8
PdWRKY4	ERE	ATTTTAAA	619	8
PdWRKY4	Myb	CAACTG	691	6
PdWRKY4	Myb	CAACTG	1845	6
PdWRKY4	MYB	CAACCA	323	6
PdWRKY4	MYB	TAACCA	741	6
PdWRKY4	TCCC-motif	TCTCCCT	1965	7	part of a light responsive element
PdWRKY4	ABRE4	CACGTA	1381	6
PdWRKY4	TATA-box	TATAAATA	15	8	core promoter element around -30 of transcription start
PdWRKY4	TATA-box	TATAAAT	16	7	core promoter element around -30 of transcription start
PdWRKY4	TATA-box	TATAAA	17	6	core promoter element around -30 of transcription start
PdWRKY4	TATA-box	TATAA	18	5	core promoter element around -30 of transcription start
PdWRKY4	TATA-box	TATA	19	4	core promoter element around -30 of transcription start
PdWRKY4	TATA-box	TATATTTATATTT	53	12	core promoter element around -30 of transcription start
PdWRKY4	TATA-box	ATATAT	55	6	core promoter element around -30 of transcription start
PdWRKY4	TATA-box	TATATA	56	6	core promoter element around -30 of transcription start
PdWRKY4	TATA-box	ATATAT	57	6	core promoter element around -30 of transcription start
PdWRKY4	TATA-box	TATATA	58	6	core promoter element around -30 of transcription start
PdWRKY4	TATA-box	ATATAT	59	6	core promoter element around -30 of transcription start
PdWRKY4	TATA-box	TATATA	60	6	core promoter element around -30 of transcription start
PdWRKY4	TATA-box	ATATAT	61	6	core promoter element around -30 of transcription start
PdWRKY4	TATA-box	TATATA	62	6	core promoter element around -30 of transcription start
PdWRKY4	TATA-box	ATATAT	63	6	core promoter element around -30 of transcription start
PdWRKY4	TATA-box	TATATA	64	6	core promoter element around -30 of transcription start
PdWRKY4	TATA-box	ATATAT	65	6	core promoter element around -30 of transcription start
PdWRKY4	TATA-box	TATATA	66	6	core promoter element around -30 of transcription start
PdWRKY4	TATA-box	ATATAT	67	6	core promoter element around -30 of transcription start
PdWRKY4	TATA-box	TATATA	68	6	core promoter element around -30 of transcription start
PdWRKY4	TATA-box	ATATAT	69	6	core promoter element around -30 of transcription start
PdWRKY4	TATA-box	TATATA	70	6	core promoter element around -30 of transcription start
PdWRKY4	TATA-box	ATATAT	71	6	core promoter element around -30 of transcription start
PdWRKY4	TATA-box	TATATA	72	6	core promoter element around -30 of transcription start
PdWRKY4	TATA-box	ATATAT	73	6	core promoter element around -30 of transcription start
PdWRKY4	TATA-box	TATATA	74	6	core promoter element around -30 of transcription start
PdWRKY4	TATA-box	ATATAT	75	6	core promoter element around -30 of transcription start
PdWRKY4	TATA-box	TATATA	76	6	core promoter element around -30 of transcription start
PdWRKY4	TATA-box	ATATAT	77	6	core promoter element around -30 of transcription start
PdWRKY4	TATA-box	TATA	78	4	core promoter element around -30 of transcription start
PdWRKY4	TATA-box	ATATAT	157	6	core promoter element around -30 of transcription start
PdWRKY4	TATA-box	TATA	158	4	core promoter element around -30 of transcription start
PdWRKY4	TATA-box	TATAAAA	263	7	core promoter element around -30 of transcription start
PdWRKY4	TATA-box	TATAAA	264	6	core promoter element around -30 of transcription start
PdWRKY4	TATA-box	TATAA	265	5	core promoter element around -30 of transcription start
PdWRKY4	TATA-box	TATA	266	4	core promoter element around -30 of transcription start
PdWRKY4	TATA-box	TATA	281	4	core promoter element around -30 of transcription start
PdWRKY4	TATA-box	TATTTAAA	283	8	core promoter element around -30 of transcription start
PdWRKY4	TATA-box	TATTTAAA	285	8	core promoter element around -30 of transcription start
PdWRKY4	TATA-box	TATA	303	4	core promoter element around -30 of transcription start
PdWRKY4	TATA-box	ATTATA	436	6	core promoter element around -30 of transcription start
PdWRKY4	TATA-box	TATAA	437	5	core promoter element around -30 of transcription start
PdWRKY4	TATA-box	TATA	438	4	core promoter element around -30 of transcription start
PdWRKY4	TATA-box	TATATA	678	6	core promoter element around -30 of transcription start
PdWRKY4	TATA-box	ATATAT	679	6	core promoter element around -30 of transcription start
PdWRKY4	TATA-box	TATATA	680	6	core promoter element around -30 of transcription start
PdWRKY4	TATA-box	ATATAT	681	6	core promoter element around -30 of transcription start
PdWRKY4	TATA-box	TATATA	682	6	core promoter element around -30 of transcription start
PdWRKY4	TATA-box	TATA	684	4	core promoter element around -30 of transcription start
PdWRKY4	TATA-box	TATAA	744	5	core promoter element around -30 of transcription start
PdWRKY4	TATA-box	TATA	745	4	core promoter element around -30 of transcription start
PdWRKY4	TATA-box	ATTATA	864	6	core promoter element around -30 of transcription start
PdWRKY4	TATA-box	TATAA	865	5	core promoter element around -30 of transcription start
PdWRKY4	TATA-box	TATA	866	4	core promoter element around -30 of transcription start
PdWRKY4	TATA-box	TATA	928	4	core promoter element around -30 of transcription start
PdWRKY4	TATA-box	ATATAT	953	6	core promoter element around -30 of transcription start
PdWRKY4	TATA-box	TATA	954	4	core promoter element around -30 of transcription start
PdWRKY4	TATA-box	ATTATA	1032	6	core promoter element around -30 of transcription start
PdWRKY4	TATA-box	TATATAA	1033	7	core promoter element around -30 of transcription start
PdWRKY4	TATA-box	TATATA	1034	6	core promoter element around -30 of transcription start
PdWRKY4	TATA-box	ATATAT	1035	6	core promoter element around -30 of transcription start
PdWRKY4	TATA-box	TATATA	1036	6	core promoter element around -30 of transcription start
PdWRKY4	TATA-box	ATATAA	1037	6	core promoter element around -30 of transcription start
PdWRKY4	TATA-box	TATA	1038	4	core promoter element around -30 of transcription start
PdWRKY4	TATA-box	ATATAT	1106	6	core promoter element around -30 of transcription start
PdWRKY4	TATA-box	TATATA	1107	6	core promoter element around -30 of transcription start
PdWRKY4	TATA-box	ATATAT	1108	6	core promoter element around -30 of transcription start
PdWRKY4	TATA-box	TATATA	1109	6	core promoter element around -30 of transcription start
PdWRKY4	TATA-box	ATATAT	1110	6	core promoter element around -30 of transcription start
PdWRKY4	TATA-box	TATA	1111	4	core promoter element around -30 of transcription start
PdWRKY4	TATA-box	TATA	1422	4	core promoter element around -30 of transcription start
PdWRKY4	TATA-box	TATAAA	1745	6	core promoter element around -30 of transcription start
PdWRKY4	TATA-box	TATATAA	1746	7	core promoter element around -30 of transcription start
PdWRKY4	TATA-box	TATATA	1747	6	core promoter element around -30 of transcription start
PdWRKY4	TATA-box	ATATAA	1748	6	core promoter element around -30 of transcription start
PdWRKY4	TATA-box	TATA	1749	4	core promoter element around -30 of transcription start
PdWRKY4	TATA-box	TATTTAAA	1754	8	core promoter element around -30 of transcription start
PdWRKY4	TATA-box	TATACA	1864	6	core promoter element around -30 of transcription start
PdWRKY4	TATA-box	TATA	1866	4	core promoter element around -30 of transcription start
PdWRKY4	TATA-box	TATACA	1894	6	core promoter element around -30 of transcription start
PdWRKY4	TATA-box	TATA	1896	4	core promoter element around -30 of transcription start
PdWRKY4	TATA-box	TATA	1905	4	core promoter element around -30 of transcription start
PdWRKY4	TATA-box	TATA	1924	4	core promoter element around -30 of transcription start
PdWRKY4	TATA-box	TATA	1977	4	core promoter element around -30 of transcription start
PdWRKY4	ABRE	CACGTG	495	6	cis-acting element involved in the abscisic acid responsiveness
PdWRKY4	ABRE	ACGTG	496	5	cis-acting element involved in the abscisic acid responsiveness
PdWRKY4	ABRE	GCAACGTGTC	802	9	cis-acting element involved in the abscisic acid responsiveness
PdWRKY4	ABRE	ACGTG	804	5	cis-acting element involved in the abscisic acid responsiveness
PdWRKY4	ABRE	ACGTG	1381	5	cis-acting element involved in the abscisic acid responsiveness
PdWRKY4		motif_sequence	164	4	short_function
PdWRKY4		motif_sequence	236	4	short_function
PdWRKY4		motif_sequence	362	4	short_function
PdWRKY4		motif_sequence	487	4	short_function
PdWRKY4		motif_sequence	810	4	short_function
PdWRKY4		motif_sequence	909	4	short_function
PdWRKY4		motif_sequence	1321	4	short_function
PdWRKY4		motif_sequence	1372	4	short_function
PdWRKY4		motif_sequence	1469	4	short_function
PdWRKY4		motif_sequence	1664	4	short_function
PdWRKY4		motif_sequence	1714	4	short_function
PdWRKY4		motif_sequence	1964	4	short_function
PdWRKY4	G-Box	CACGTG	495	6	cis-acting regulatory element involved in light responsiveness
PdWRKY4	G-Box	CACGTT	804	6	cis-acting regulatory element involved in light responsiveness
PdWRKY4	MYC	CATGTG	488	6
PdWRKY4	MYC	CAATTG	1081	6
PdWRKY4	MYC	CATTTG	1472	6
PdWRKY4	AT~TATA-box	TATATA	56	6
PdWRKY4	AT~TATA-box	TATATA	58	6
PdWRKY4	AT~TATA-box	TATATA	60	6
PdWRKY4	AT~TATA-box	TATATA	62	6
PdWRKY4	AT~TATA-box	TATATA	64	6
PdWRKY4	AT~TATA-box	TATATA	66	6
PdWRKY4	AT~TATA-box	TATATA	68	6
PdWRKY4	AT~TATA-box	TATATA	70	6
PdWRKY4	AT~TATA-box	TATATA	72	6
PdWRKY4	AT~TATA-box	TATATA	74	6
PdWRKY4	AT~TATA-box	TATATA	76	6
PdWRKY4	AT~TATA-box	TATATA	678	6
PdWRKY4	AT~TATA-box	TATATA	680	6
PdWRKY4	AT~TATA-box	TATATA	682	6
PdWRKY4	AT~TATA-box	TATATA	1034	6
PdWRKY4	AT~TATA-box	TATATA	1036	6
PdWRKY4	AT~TATA-box	TATATA	1107	6
PdWRKY4	AT~TATA-box	TATATA	1109	6
PdWRKY4	AT~TATA-box	TATATAAA	1745	8
PdWRKY4	AT~TATA-box	TATATA	1747	6
PdWRKY4	MYB-like sequence	TAACCA	741	6
PdWRKY4	box S	AGCCACC	1187	7
PdWRKY4	CGTCA-motif	CGTCA	83	5	cis-acting regulatory element involved in the MeJA-responsiveness
PdWRKY4	CGTCA-motif	CGTCA	873	5	cis-acting regulatory element involved in the MeJA-responsiveness
PdWRKY4	CGTCA-motif	CGTCA	1465	5	cis-acting regulatory element involved in the MeJA-responsiveness
PdWRKY4	CGTCA-motif	CGTCA	1589	5	cis-acting regulatory element involved in the MeJA-responsiveness
PdWRKY4	CGTCA-motif	CGTCA	1640	5	cis-acting regulatory element involved in the MeJA-responsiveness
PdWRKY4	ARE	AAACCA	203	6	cis-acting regulatory element essential for the anaerobic induction
PdWRKY4	ARE	AAACCA	597	6	cis-acting regulatory element essential for the anaerobic induction
PdWRKY4	ARE	AAACCA	755	6	cis-acting regulatory element essential for the anaerobic induction
PdWRKY4	ARE	AAACCA	1510	6	cis-acting regulatory element essential for the anaerobic induction
PdWRKY5	MRE	AACCTAA	244	7	MYB binding site involved in light responsiveness
PdWRKY5	TGACG-motif	TGACG	1898	5	cis-acting regulatory element involved in the MeJA-responsiveness
PdWRKY5	Box 4	ATTAAT	941	6	part of a conserved DNA module involved in light responsiveness
PdWRKY5	Box 4	ATTAAT	1598	6	part of a conserved DNA module involved in light responsiveness
PdWRKY5	Box 4	ATTAAT	1610	6	part of a conserved DNA module involved in light responsiveness
PdWRKY5	STRE	AGGGG	208	5
PdWRKY5	STRE	AGGGG	406	5
PdWRKY5	STRE	AGGGG	1254	5
PdWRKY5	CAAT-box	CCAAT	82	5	common cis-acting element in promoter and enhancer regions
PdWRKY5	CAAT-box	CAAT	83	4
PdWRKY5	CAAT-box	CAAT	118	4
PdWRKY5	CAAT-box	CAAAT	152	5	common cis-acting element in promoter and enhancer regions
PdWRKY5	CAAT-box	CAAT	155	4
PdWRKY5	CAAT-box	CCAAT	166	5	common cis-acting element in promoter and enhancer regions
PdWRKY5	CAAT-box	CCAAT	224	5	common cis-acting element in promoter and enhancer regions
PdWRKY5	CAAT-box	CAAT	225	4
PdWRKY5	CAAT-box	CAAT	257	4
PdWRKY5	CAAT-box	CAAT	259	4
PdWRKY5	CAAT-box	CAAT	266	4
PdWRKY5	CAAT-box	CAAAT	320	5	common cis-acting element in promoter and enhancer regions
PdWRKY5	CAAT-box	CAAT	323	4
PdWRKY5	CAAT-box	CCAAT	451	5	common cis-acting element in promoter and enhancer regions
PdWRKY5	CAAT-box	CAAT	539	4
PdWRKY5	CAAT-box	CAAT	550	4
PdWRKY5	CAAT-box	CAAT	587	4
PdWRKY5	CAAT-box	CAAT	611	4
PdWRKY5	CAAT-box	CCAAT	709	5	common cis-acting element in promoter and enhancer regions
PdWRKY5	CAAT-box	CAAT	720	4
PdWRKY5	CAAT-box	CAAT	726	4
PdWRKY5	CAAT-box	CAAT	806	4
PdWRKY5	CAAT-box	CAAT	860	4
PdWRKY5	CAAT-box	CAAAT	921	5	common cis-acting element in promoter and enhancer regions
PdWRKY5	CAAT-box	CAAT	1018	4
PdWRKY5	CAAT-box	CAAT	1083	4
PdWRKY5	CAAT-box	CAAT	1224	4
PdWRKY5	CAAT-box	CCAAT	1285	5	common cis-acting element in promoter and enhancer regions
PdWRKY5	CAAT-box	CAAT	1286	4
PdWRKY5	CAAT-box	CAAT	1298	4
PdWRKY5	CAAT-box	CAAT	1338	4
PdWRKY5	CAAT-box	CAAT	1473	4
PdWRKY5	CAAT-box	CAAT	1484	4
PdWRKY5	CAAT-box	CAAAT	1490	5	common cis-acting element in promoter and enhancer regions
PdWRKY5	CAAT-box	CAAAT	1586	5	common cis-acting element in promoter and enhancer regions
PdWRKY5	CAAT-box	CAAT	1596	4
PdWRKY5	CAAT-box	CAAT	1634	4
PdWRKY5	CAAT-box	CCAAT	1642	5	common cis-acting element in promoter and enhancer regions
PdWRKY5	CAAT-box	CAAT	1643	4
PdWRKY5	CAAT-box	CAAAT	1735	5	common cis-acting element in promoter and enhancer regions
PdWRKY5	CAAT-box	CAAT	1751	4
PdWRKY5	CAAT-box	CAAAT	1803	5	common cis-acting element in promoter and enhancer regions
PdWRKY5	CAAT-box	CAAT	1832	4
PdWRKY5	CAAT-box	CAAT	1836	4
PdWRKY5	CAAT-box	CAAT	1861	4
PdWRKY5	CAAT-box	CAAT	1893	4
PdWRKY5	CAAT-box	CAAAT	1962	5	common cis-acting element in promoter and enhancer regions
PdWRKY5	Box III	atCATTTTCACt	1557	11	protein binding site
PdWRKY5	chs-CMA1a	TTACTTAA	1361	8	part of a light responsive element
PdWRKY5	WRE3	CCACCT	780	6
PdWRKY5	WRE3	CCACCT	1439	6
PdWRKY5	WRE3	CCACCT	1661	6
PdWRKY5	WRE3	CCACCT	1945	6
PdWRKY5	GATA-motif	GATAGGA	1693	7	part of a light responsive element
PdWRKY5	MBS	CAACTG	202	6	MYB binding site involved in drought-inducibility
PdWRKY5	as-1	TGACG	1898	5
PdWRKY5	GA-motif	ATAGATAA	499	8	part of a light responsive element
PdWRKY5	MBSI	TTTTTACGGTTA	1315	11	MYB binding site involved in flavonoid biosynthetic genes regulation
PdWRKY5	Unnamed__4	CTCC	17	4
PdWRKY5	Unnamed__4	CTCC	111	4
PdWRKY5	Unnamed__4	CTCC	140	4
PdWRKY5	Unnamed__4	CTCC	160	4
PdWRKY5	Unnamed__4	CTCC	187	4
PdWRKY5	Unnamed__4	CTCC	196	4
PdWRKY5	Unnamed__4	CTCC	240	4
PdWRKY5	Unnamed__4	CTCC	381	4
PdWRKY5	Unnamed__4	CTCC	464	4
PdWRKY5	Unnamed__4	CTCC	774	4
PdWRKY5	Unnamed__4	CTCC	1239	4
PdWRKY5	Unnamed__4	CTCC	1257	4
PdWRKY5	Unnamed__4	CTCC	1311	4
PdWRKY5	Unnamed__4	CTCC	1437	4
PdWRKY5	Unnamed__4	CTCC	1918	4
PdWRKY5	Unnamed__4	CTCC	1925	4
PdWRKY5	Unnamed__4	CTCC	1929	4
PdWRKY5	ABRE3a	TACGTG	1347	6
PdWRKY5	ERE	ATTTTAAA	1647	8
PdWRKY5	I-box	GTATAAGGCC	1573	9	part of a light responsive element
PdWRKY5	G-box	TACGTG	1347	6	cis-acting regulatory element involved in light responsiveness
PdWRKY5	TATA-box	ATATAT	337	6	core promoter element around -30 of transcription start
PdWRKY5	TATA-box	TATA	338	4	core promoter element around -30 of transcription start
PdWRKY5	TATA-box	TATA	555	4	core promoter element around -30 of transcription start
PdWRKY5	TATA-box	TATA	626	4	core promoter element around -30 of transcription start
PdWRKY5	TATA-box	TATACA	728	6	core promoter element around -30 of transcription start
PdWRKY5	TATA-box	TATA	730	4	core promoter element around -30 of transcription start
PdWRKY5	TATA-box	TATAA	760	5	core promoter element around -30 of transcription start
PdWRKY5	TATA-box	TATA	761	4	core promoter element around -30 of transcription start
PdWRKY5	TATA-box	ATATAT	862	6	core promoter element around -30 of transcription start
PdWRKY5	TATA-box	TATATA	863	6	core promoter element around -30 of transcription start
PdWRKY5	TATA-box	ATATAT	864	6	core promoter element around -30 of transcription start
PdWRKY5	TATA-box	TATATA	865	6	core promoter element around -30 of transcription start
PdWRKY5	TATA-box	ATATAT	866	6	core promoter element around -30 of transcription start
PdWRKY5	TATA-box	TATATA	867	6	core promoter element around -30 of transcription start
PdWRKY5	TATA-box	ATATAT	868	6	core promoter element around -30 of transcription start
PdWRKY5	TATA-box	TATATA	869	6	core promoter element around -30 of transcription start
PdWRKY5	TATA-box	TATA	871	4	core promoter element around -30 of transcription start
PdWRKY5	TATA-box	ATATAA	878	6	core promoter element around -30 of transcription start
PdWRKY5	TATA-box	TATA	879	4	core promoter element around -30 of transcription start
PdWRKY5	TATA-box	ATATAT	913	6	core promoter element around -30 of transcription start
PdWRKY5	TATA-box	TATATA	914	6	core promoter element around -30 of transcription start
PdWRKY5	TATA-box	ATATAA	915	6	core promoter element around -30 of transcription start
PdWRKY5	TATA-box	TATA	916	4	core promoter element around -30 of transcription start
PdWRKY5	TATA-box	TATATA	1143	6	core promoter element around -30 of transcription start
PdWRKY5	TATA-box	ATATAT	1144	6	core promoter element around -30 of transcription start
PdWRKY5	TATA-box	TATA	1145	4	core promoter element around -30 of transcription start
PdWRKY5	TATA-box	ATTATA	1329	6	core promoter element around -30 of transcription start
PdWRKY5	TATA-box	TATAA	1330	5	core promoter element around -30 of transcription start
PdWRKY5	TATA-box	TATA	1331	4	core promoter element around -30 of transcription start
PdWRKY5	TATA-box	TATAA	1577	5	core promoter element around -30 of transcription start
PdWRKY5	TATA-box	TATA	1578	4	core promoter element around -30 of transcription start
PdWRKY5	TATA-box	TACAAAA	1620	7	core promoter element around -30 of transcription start
PdWRKY5	G-Box	CACGTT	747	6	cis-acting regulatory element involved in light responsiveness
PdWRKY5	G-Box	CACGTT	889	6	cis-acting regulatory element involved in light responsiveness
PdWRKY5	ABRE	ACGTG	747	5	cis-acting element involved in the abscisic acid responsiveness
PdWRKY5	ABRE	ACGTG	889	5	cis-acting element involved in the abscisic acid responsiveness
PdWRKY5	ABRE	ACGTG	1348	5	cis-acting element involved in the abscisic acid responsiveness
PdWRKY5		motif_sequence	77	4	short_function
PdWRKY5		motif_sequence	140	4	short_function
PdWRKY5		motif_sequence	160	4	short_function
PdWRKY5		motif_sequence	341	4	short_function
PdWRKY5		motif_sequence	439	4	short_function
PdWRKY5		motif_sequence	467	4	short_function
PdWRKY5		motif_sequence	733	4	short_function
PdWRKY5		motif_sequence	822	4	short_function
PdWRKY5		motif_sequence	899	4	short_function
PdWRKY5		motif_sequence	933	4	short_function
PdWRKY5		motif_sequence	1024	4	short_function
PdWRKY5		motif_sequence	1066	4	short_function
PdWRKY5		motif_sequence	1120	4	short_function
PdWRKY5		motif_sequence	1152	4	short_function
PdWRKY5		motif_sequence	1309	4	short_function
PdWRKY5		motif_sequence	1435	4	short_function
PdWRKY5		motif_sequence	1711	4	short_function
PdWRKY5		motif_sequence	1782	4	short_function
PdWRKY5		motif_sequence	1825	4	short_function
PdWRKY5	MYB	CAACAG	843	6
PdWRKY5	MYB	CAACAG	1204	6
PdWRKY5	MYB	CAACCA	1282	6
PdWRKY5	MYB	TAACCA	1639	6
PdWRKY5	Myb	CAACTG	202	6
PdWRKY5	Myb	TAACTG	395	6
PdWRKY5	Myb	TAACTG	1450	6
PdWRKY5	ABRE4	CACGTA	1347	6
PdWRKY5	Unnamed__1	CGTGG	830	5
PdWRKY5	Unnamed__1	CGTGG	1260	5
PdWRKY5	Myb-binding site	CAACAG	843	6
PdWRKY5	Myb-binding site	CAACAG	1204	6
PdWRKY5	AT~TATA-box	TATATA	863	6
PdWRKY5	AT~TATA-box	TATATA	865	6
PdWRKY5	AT~TATA-box	TATATA	867	6
PdWRKY5	AT~TATA-box	TATATA	869	6
PdWRKY5	AT~TATA-box	TATATA	914	6
PdWRKY5	AT~TATA-box	TATATA	1143	6
PdWRKY5	MYB-like sequence	TAACCA	1639	6
PdWRKY5	MYC	CAATTG	257	6
PdWRKY5	MYC	CATGTG	1412	6
PdWRKY5	MYC	CATGTG	1667	6
PdWRKY5	MYC	CATTTG	1802	6
PdWRKY5	GT1-motif	GGTTAA	1638	6	light responsive element
PdWRKY5	ARE	AAACCA	659	6	cis-acting regulatory element essential for the anaerobic induction
PdWRKY5	Sp1	GGGCGG	370	6	light responsive element
PdWRKY5	CGTCA-motif	CGTCA	1898	5	cis-acting regulatory element involved in the MeJA-responsiveness
PdWRKY5	box S	AGCCACC	414	7
PdWRKY6	F-box	CTATTCTCATT	1246	10
PdWRKY6	MYB	TAACCA	123	6
PdWRKY6	MYB	TAACCA	1476	6
PdWRKY6	MYB recognition site	CCGTTG	624	6
PdWRKY6	MYB recognition site	CCGTTG	1584	6
PdWRKY6	ABRE4	CACGTA	1277	6
PdWRKY6	ABRE4	CACGTA	1703	6
PdWRKY6	Unnamed__1	CGTGG	147	5
PdWRKY6	Unnamed__1	CGTGG	589	5
PdWRKY6	Unnamed__1	CGTGG	1165	5
PdWRKY6	Unnamed__1	GAATTTAATTAA	1627	11	60K protein binding site
PdWRKY6	TATA-box	TACATAAA	169	8	core promoter element around -30 of transcription start
PdWRKY6	TATA-box	TATAA	278	5	core promoter element around -30 of transcription start
PdWRKY6	TATA-box	TATA	279	4	core promoter element around -30 of transcription start
PdWRKY6	TATA-box	TAAAGATT	523	8	core promoter element around -30 of transcription start
PdWRKY6	TATA-box	TATAAAT	528	7	core promoter element around -30 of transcription start
PdWRKY6	TATA-box	TATAAA	529	6	core promoter element around -30 of transcription start
PdWRKY6	TATA-box	TATAA	530	5	core promoter element around -30 of transcription start
PdWRKY6	TATA-box	TATA	531	4	core promoter element around -30 of transcription start
PdWRKY6	TATA-box	ccTATAAAaa	674	9	core promoter element around -30 of transcription start
PdWRKY6	TATA-box	TATA	712	4	core promoter element around -30 of transcription start
PdWRKY6	TATA-box	TATACA	788	6	core promoter element around -30 of transcription start
PdWRKY6	TATA-box	TATA	790	4	core promoter element around -30 of transcription start
PdWRKY6	TATA-box	TATAAATA	912	8	core promoter element around -30 of transcription start
PdWRKY6	TATA-box	TATAAAT	913	7	core promoter element around -30 of transcription start
PdWRKY6	TATA-box	TATAAA	914	6	core promoter element around -30 of transcription start
PdWRKY6	TATA-box	TATAA	915	5	core promoter element around -30 of transcription start
PdWRKY6	TATA-box	TATA	916	4	core promoter element around -30 of transcription start
PdWRKY6	TATA-box	TAAAGATT	932	8	core promoter element around -30 of transcription start
PdWRKY6	TATA-box	TACAAAA	1150	7	core promoter element around -30 of transcription start
PdWRKY6	TATA-box	ATATAA	1304	6	core promoter element around -30 of transcription start
PdWRKY6	TATA-box	TATA	1305	4	core promoter element around -30 of transcription start
PdWRKY6	TATA-box	TACATAAA	1313	8	core promoter element around -30 of transcription start
PdWRKY6	TATA-box	ATATAT	1330	6	core promoter element around -30 of transcription start
PdWRKY6	TATA-box	TATATA	1331	6	core promoter element around -30 of transcription start
PdWRKY6	TATA-box	ATATAT	1332	6	core promoter element around -30 of transcription start
PdWRKY6	TATA-box	TATATA	1333	6	core promoter element around -30 of transcription start
PdWRKY6	TATA-box	ATATAT	1334	6	core promoter element around -30 of transcription start
PdWRKY6	TATA-box	TATATA	1335	6	core promoter element around -30 of transcription start
PdWRKY6	TATA-box	ATATAT	1336	6	core promoter element around -30 of transcription start
PdWRKY6	TATA-box	TATATA	1337	6	core promoter element around -30 of transcription start
PdWRKY6	TATA-box	ATATAT	1338	6	core promoter element around -30 of transcription start
PdWRKY6	TATA-box	TATATA	1339	6	core promoter element around -30 of transcription start
PdWRKY6	TATA-box	ATATAT	1340	6	core promoter element around -30 of transcription start
PdWRKY6	TATA-box	TATATA	1341	6	core promoter element around -30 of transcription start
PdWRKY6	TATA-box	ATATAT	1342	6	core promoter element around -30 of transcription start
PdWRKY6	TATA-box	TATATA	1343	6	core promoter element around -30 of transcription start
PdWRKY6	TATA-box	ATATAT	1344	6	core promoter element around -30 of transcription start
PdWRKY6	TATA-box	TATATA	1345	6	core promoter element around -30 of transcription start
PdWRKY6	TATA-box	ATATAT	1346	6	core promoter element around -30 of transcription start
PdWRKY6	TATA-box	TATATA	1347	6	core promoter element around -30 of transcription start
PdWRKY6	TATA-box	ATATAT	1348	6	core promoter element around -30 of transcription start
PdWRKY6	TATA-box	TATA	1349	4	core promoter element around -30 of transcription start
PdWRKY6	TATA-box	ATTATA	1410	6	core promoter element around -30 of transcription start
PdWRKY6	TATA-box	TATATAA	1411	7	core promoter element around -30 of transcription start
PdWRKY6	TATA-box	TATATA	1412	6	core promoter element around -30 of transcription start
PdWRKY6	TATA-box	ATATAT	1413	6	core promoter element around -30 of transcription start
PdWRKY6	TATA-box	TATATA	1414	6	core promoter element around -30 of transcription start
PdWRKY6	TATA-box	ATATAT	1415	6	core promoter element around -30 of transcription start
PdWRKY6	TATA-box	TATATA	1416	6	core promoter element around -30 of transcription start
PdWRKY6	TATA-box	TATA	1418	4	core promoter element around -30 of transcription start
PdWRKY6	TATA-box	TATACA	1534	6	core promoter element around -30 of transcription start
PdWRKY6	TATA-box	TATA	1536	4	core promoter element around -30 of transcription start
PdWRKY6	TATA-box	ATATAT	1596	6	core promoter element around -30 of transcription start
PdWRKY6	TATA-box	TATATA	1597	6	core promoter element around -30 of transcription start
PdWRKY6	TATA-box	ATATAA	1598	6	core promoter element around -30 of transcription start
PdWRKY6	TATA-box	TATA	1599	4	core promoter element around -30 of transcription start
PdWRKY6	TATA-box	TATA	1714	4	core promoter element around -30 of transcription start
PdWRKY6	TATA-box	ATATAA	1812	6	core promoter element around -30 of transcription start
PdWRKY6	TATA-box	TATA	1813	4	core promoter element around -30 of transcription start
PdWRKY6	TATA-box	ATATAA	1817	6	core promoter element around -30 of transcription start
PdWRKY6	TATA-box	TATA	1818	4	core promoter element around -30 of transcription start
PdWRKY6	TATA-box	ATATAA	1822	6	core promoter element around -30 of transcription start
PdWRKY6	TATA-box	TATA	1823	4	core promoter element around -30 of transcription start
PdWRKY6	TATA-box	ATATAT	1827	6	core promoter element around -30 of transcription start
PdWRKY6	TATA-box	TATATA	1828	6	core promoter element around -30 of transcription start
PdWRKY6	TATA-box	ATATAT	1829	6	core promoter element around -30 of transcription start
PdWRKY6	TATA-box	TATATA	1830	6	core promoter element around -30 of transcription start
PdWRKY6	TATA-box	ATATAT	1831	6	core promoter element around -30 of transcription start
PdWRKY6	TATA-box	TATA	1832	4	core promoter element around -30 of transcription start
PdWRKY6	TATA-box	taTATAAAtc	1834	9	core promoter element around -30 of transcription start
PdWRKY6	TATA-box	TATAAAT	1835	7	core promoter element around -30 of transcription start
PdWRKY6	TATA-box	TATAAA	1836	6	core promoter element around -30 of transcription start
PdWRKY6	TATA-box	TATATAA	1837	7	core promoter element around -30 of transcription start
PdWRKY6	TATA-box	TATATA	1838	6	core promoter element around -30 of transcription start
PdWRKY6	TATA-box	ATATAA	1839	6	core promoter element around -30 of transcription start
PdWRKY6	TATA-box	TATA	1840	4	core promoter element around -30 of transcription start
PdWRKY6	TATA-box	ATATAT	1878	6	core promoter element around -30 of transcription start
PdWRKY6	TATA-box	TATATA	1879	6	core promoter element around -30 of transcription start
PdWRKY6	TATA-box	ATATAT	1880	6	core promoter element around -30 of transcription start
PdWRKY6	TATA-box	TATA	1881	4	core promoter element around -30 of transcription start
PdWRKY6	TATA-box	TATA	1950	4	core promoter element around -30 of transcription start
PdWRKY6	G-Box	CACGTT	148	6	cis-acting regulatory element involved in light responsiveness
PdWRKY6	G-Box	CACGTG	232	6	cis-acting regulatory element involved in light responsiveness
PdWRKY6	G-Box	CACGTT	310	6	cis-acting regulatory element involved in light responsiveness
PdWRKY6		motif_sequence	166	4	short_function
PdWRKY6		motif_sequence	250	4	short_function
PdWRKY6		motif_sequence	576	4	short_function
PdWRKY6		motif_sequence	584	4	short_function
PdWRKY6		motif_sequence	694	4	short_function
PdWRKY6		motif_sequence	698	4	short_function
PdWRKY6		motif_sequence	738	4	short_function
PdWRKY6		motif_sequence	906	4	short_function
PdWRKY6		motif_sequence	1206	4	short_function
PdWRKY6		motif_sequence	1280	4	short_function
PdWRKY6		motif_sequence	1316	4	short_function
PdWRKY6		motif_sequence	1514	4	short_function
PdWRKY6		motif_sequence	1572	4	short_function
PdWRKY6		motif_sequence	1916	4	short_function
PdWRKY6	ABRE	ACGTG	148	5	cis-acting element involved in the abscisic acid responsiveness
PdWRKY6	ABRE	CGCACGTGTC	230	9	cis-acting element involved in the abscisic acid responsiveness
PdWRKY6	ABRE	CACGTG	232	6	cis-acting element involved in the abscisic acid responsiveness
PdWRKY6	ABRE	ACGTG	233	5	cis-acting element involved in the abscisic acid responsiveness
PdWRKY6	ABRE	ACGTG	311	5	cis-acting element involved in the abscisic acid responsiveness
PdWRKY6	ABRE	ACGTG	377	5	cis-acting element involved in the abscisic acid responsiveness
PdWRKY6	ABRE	ACGTG	590	5	cis-acting element involved in the abscisic acid responsiveness
PdWRKY6	ABRE	ACGTG	1277	5	cis-acting element involved in the abscisic acid responsiveness
PdWRKY6	ABRE	ACGTG	1704	5	cis-acting element involved in the abscisic acid responsiveness
PdWRKY6	CGTCA-motif	CGTCA	375	5	cis-acting regulatory element involved in the MeJA-responsiveness
PdWRKY6	CGTCA-motif	CGTCA	592	5	cis-acting regulatory element involved in the MeJA-responsiveness
PdWRKY6	CGTCA-motif	CGTCA	1963	5	cis-acting regulatory element involved in the MeJA-responsiveness
PdWRKY6	HD-Zip 1	CAAT(A/T)ATTG	1181	8.5	element involved in differentiation of the palisade mesophyll cells
PdWRKY6	ARE	AAACCA	46	6	cis-acting regulatory element essential for the anaerobic induction
PdWRKY6	TATA	TATAAAAT	1599	8
PdWRKY6	Myc	TCTCTTA	440	7
PdWRKY6	chs-CMA2a	TCACTTGA	883	8	part of a light responsive element
PdWRKY6	CAT-box	GCCACT	1806	6	cis-acting regulatory element related to meristem expression
PdWRKY6	MYC	CATGTG	262	6
PdWRKY6	MYC	CATGTG	905	6
PdWRKY6	MYC	CATTTG	1069	6
PdWRKY6	MYC	CATTTG	1447	6
PdWRKY6	MYC	CATTTG	1541	6
PdWRKY6	GT1-motif	GGTTAA	1477	6	light responsive element
PdWRKY6	AT~TATA-box	TATATA	1331	6
PdWRKY6	AT~TATA-box	TATATA	1333	6
PdWRKY6	AT~TATA-box	TATATA	1335	6
PdWRKY6	AT~TATA-box	TATATA	1337	6
PdWRKY6	AT~TATA-box	TATATA	1339	6
PdWRKY6	AT~TATA-box	TATATA	1341	6
PdWRKY6	AT~TATA-box	TATATA	1343	6
PdWRKY6	AT~TATA-box	TATATA	1345	6
PdWRKY6	AT~TATA-box	TATATA	1347	6
PdWRKY6	AT~TATA-box	TATATA	1412	6
PdWRKY6	AT~TATA-box	TATATA	1414	6
PdWRKY6	AT~TATA-box	TATATA	1416	6
PdWRKY6	AT~TATA-box	TATATA	1597	6
PdWRKY6	AT~TATA-box	TATATA	1828	6
PdWRKY6	AT~TATA-box	TATATA	1830	6
PdWRKY6	AT~TATA-box	TATATAAA	1836	8
PdWRKY6	AT~TATA-box	TATATA	1838	6
PdWRKY6	AT~TATA-box	TATATA	1879	6
PdWRKY6	MYB-like sequence	TAACCA	123	6
PdWRKY6	MYB-like sequence	TAACCA	1476	6
PdWRKY6	AAGAA-motif	gGTAAAGAAA	1098	10
PdWRKY6	AAGAA-motif	GAAAGAA	1559	7
PdWRKY6	CAAT-box	CAAT	54	4
PdWRKY6	CAAT-box	CAAT	69	4
PdWRKY6	CAAT-box	CAAT	119	4
PdWRKY6	CAAT-box	CAAAT	159	5	common cis-acting element in promoter and enhancer regions
PdWRKY6	CAAT-box	CAAT	340	4
PdWRKY6	CAAT-box	CAAAT	353	5	common cis-acting element in promoter and enhancer regions
PdWRKY6	CAAT-box	CAAT	373	4
PdWRKY6	CAAT-box	CAAAT	497	5	common cis-acting element in promoter and enhancer regions
PdWRKY6	CAAT-box	CAAAT	509	5	common cis-acting element in promoter and enhancer regions
PdWRKY6	CAAT-box	CAAT	562	4
PdWRKY6	CAAT-box	CAAT	727	4
PdWRKY6	CAAT-box	CCAAT	735	5	common cis-acting element in promoter and enhancer regions
PdWRKY6	CAAT-box	CAAAT	748	5	common cis-acting element in promoter and enhancer regions
PdWRKY6	CAAT-box	CAAT	872	4
PdWRKY6	CAAT-box	CAAT	994	4
PdWRKY6	CAAT-box	CAAAT	1069	5	common cis-acting element in promoter and enhancer regions
PdWRKY6	CAAT-box	CCAAT	1095	5	common cis-acting element in promoter and enhancer regions
PdWRKY6	CAAT-box	CAAT	1181	4
PdWRKY6	CAAT-box	CCAAT	1186	5	common cis-acting element in promoter and enhancer regions
PdWRKY6	CAAT-box	CAAT	1246	4
PdWRKY6	CAAT-box	CCAAT	1261	5	common cis-acting element in promoter and enhancer regions
PdWRKY6	CAAT-box	CAAT	1287	4
PdWRKY6	CAAT-box	CAAT	1291	4
PdWRKY6	CAAT-box	CAAT	1302	4
PdWRKY6	CAAT-box	CAAT	1321	4
PdWRKY6	CAAT-box	CAAAT	1447	5	common cis-acting element in promoter and enhancer regions
PdWRKY6	CAAT-box	CAAT	1492	4
PdWRKY6	CAAT-box	CAAAT	1503	5	common cis-acting element in promoter and enhancer regions
PdWRKY6	CAAT-box	CCAAT	1518	5	common cis-acting element in promoter and enhancer regions
PdWRKY6	CAAT-box	CAAT	1519	4
PdWRKY6	CAAT-box	CAAT	1529	4
PdWRKY6	CAAT-box	CAAAT	1542	5	common cis-acting element in promoter and enhancer regions
PdWRKY6	CAAT-box	CAAAT	1605	5	common cis-acting element in promoter and enhancer regions
PdWRKY6	CAAT-box	CAAAT	1621	5	common cis-acting element in promoter and enhancer regions
PdWRKY6	CAAT-box	CAAT	1624	4
PdWRKY6	CAAT-box	CAAT	1629	4
PdWRKY6	CAAT-box	CAAT	1670	4
PdWRKY6	CAAT-box	CAAAT	1698	5	common cis-acting element in promoter and enhancer regions
PdWRKY6	CAAT-box	CAAT	1747	4
PdWRKY6	CAAT-box	CAAAT	1847	5	common cis-acting element in promoter and enhancer regions
PdWRKY6	CAAT-box	CCAAT	1866	5	common cis-acting element in promoter and enhancer regions
PdWRKY6	CAAT-box	CAAT	1884	4
PdWRKY6	Unnamed__2	CCCCGG	1910	6
PdWRKY6	chs-CMA1a	TTACTTAA	471	8	part of a light responsive element
PdWRKY6	AuxRR-core	GGTCCAT	609	7	cis-acting regulatory element involved in auxin responsiveness
PdWRKY6	CCAAT-box	CAACGG	624	6	MYBHv1 binding site
PdWRKY6	CCAAT-box	CAACGG	1584	6	MYBHv1 binding site
PdWRKY6	TGACG-motif	TGACG	375	5	cis-acting regulatory element involved in the MeJA-responsiveness
PdWRKY6	TGACG-motif	TGACG	592	5	cis-acting regulatory element involved in the MeJA-responsiveness
PdWRKY6	TGACG-motif	TGACG	1963	5	cis-acting regulatory element involved in the MeJA-responsiveness
PdWRKY6	TCA	TCATCTTCAT	764	9
PdWRKY6	Box 4	ATTAAT	466	6	part of a conserved DNA module involved in light responsiveness
PdWRKY6	Box 4	ATTAAT	919	6	part of a conserved DNA module involved in light responsiveness
PdWRKY6	Box 4	ATTAAT	1634	6	part of a conserved DNA module involved in light responsiveness
PdWRKY6	STRE	AGGGG	217	5
PdWRKY6	STRE	AGGGG	796	5
PdWRKY6	STRE	AGGGG	1255	5
PdWRKY6	I-box	GTATAAGGCC	274	9	part of a light responsive element
PdWRKY6	G-box	CACGTG	232	6	cis-acting regulatory element involved in light responsiveness
PdWRKY6	G-box	CACGTC	376	6	cis-acting regulatory element involved in light responsiveness
PdWRKY6	G-box	CACGTC	590	6	cis-acting regulatory element involved in light responsiveness
PdWRKY6	G-box	CACGAC	1163	6	cis-acting regulatory element involved in light responsiveness
PdWRKY6	G-box	TACGTG	1277	6	cis-acting regulatory element involved in light responsiveness
PdWRKY6	G-box	TACGTG	1703	6	cis-acting regulatory element involved in light responsiveness
PdWRKY6	O2-site	GATGACATGG	892	9	cis-acting regulatory element involved in zein metabolism regulation
PdWRKY6	Unnamed__4	CTCC	214	4
PdWRKY6	Unnamed__4	CTCC	252	4
PdWRKY6	Unnamed__4	CTCC	297	4
PdWRKY6	Unnamed__4	CTCC	628	4
PdWRKY6	Unnamed__4	CTCC	700	4
PdWRKY6	Unnamed__4	CTCC	738	4
PdWRKY6	Unnamed__4	CTCC	1145	4
PdWRKY6	Unnamed__4	CTCC	1516	4
PdWRKY6	Unnamed__4	CTCC	1941	4
PdWRKY6	Unnamed__6	taTAAATATct	1831	10
PdWRKY6	ABRE3a	TACGTG	1277	6
PdWRKY6	ABRE3a	TACGTG	1703	6
PdWRKY6	TCA-element	TCAGAAGAGG	289	9	cis-acting element involved in salicylic acid responsiveness
PdWRKY6	as-1	TGACG	375	5
PdWRKY6	as-1	TGACG	592	5
PdWRKY6	as-1	TGACG	1963	5
PdWRKY7a	GATA-motif	AAGGATAAGG	435	9	part of a light responsive element
PdWRKY7a	GATA-motif	AAGGATAAGG	1327	9	part of a light responsive element
PdWRKY7a	GATA-motif	AAGATAAGATT	1860	10	part of a light responsive element
PdWRKY7a	CCGTCC motif	CCGTCC	1729	6
PdWRKY7a	TGA-element	AACGAC	1504	6	auxin-responsive element
PdWRKY7a	CAAT-box	CAAT	30	4
PdWRKY7a	CAAT-box	CAAT	71	4
PdWRKY7a	CAAT-box	CAAT	129	4
PdWRKY7a	CAAT-box	CAAT	146	4
PdWRKY7a	CAAT-box	CAAT	151	4
PdWRKY7a	CAAT-box	CAAT	201	4
PdWRKY7a	CAAT-box	CAAT	225	4
PdWRKY7a	CAAT-box	CAAT	382	4
PdWRKY7a	CAAT-box	CAAT	446	4
PdWRKY7a	CAAT-box	CCAAT	548	5	common cis-acting element in promoter and enhancer regions
PdWRKY7a	CAAT-box	CAAT	549	4
PdWRKY7a	CAAT-box	CAAAT	551	5	common cis-acting element in promoter and enhancer regions
PdWRKY7a	CAAT-box	CAAT	589	4
PdWRKY7a	CAAT-box	CAAAT	605	5	common cis-acting element in promoter and enhancer regions
PdWRKY7a	CAAT-box	CCAAT	772	5	common cis-acting element in promoter and enhancer regions
PdWRKY7a	CAAT-box	CAAT	773	4
PdWRKY7a	CAAT-box	CAAT	804	4
PdWRKY7a	CAAT-box	CCAAT	808	5	common cis-acting element in promoter and enhancer regions
PdWRKY7a	CAAT-box	CAAT	809	4
PdWRKY7a	CAAT-box	CAAT	905	4
PdWRKY7a	CAAT-box	CAAT	950	4
PdWRKY7a	CAAT-box	CAAT	982	4
PdWRKY7a	CAAT-box	CCAAT	1014	5	common cis-acting element in promoter and enhancer regions
PdWRKY7a	CAAT-box	CAAT	1015	4
PdWRKY7a	CAAT-box	CAAT	1025	4
PdWRKY7a	CAAT-box	CAAT	1038	4
PdWRKY7a	CAAT-box	CAAT	1092	4
PdWRKY7a	CAAT-box	CAAT	1215	4
PdWRKY7a	CAAT-box	CAAT	1240	4
PdWRKY7a	CAAT-box	CAAT	1325	4
PdWRKY7a	CAAT-box	CCAAT	1359	5	common cis-acting element in promoter and enhancer regions
PdWRKY7a	CAAT-box	CAAAT	1396	5	common cis-acting element in promoter and enhancer regions
PdWRKY7a	CAAT-box	CAAT	1447	4
PdWRKY7a	CAAT-box	CAAT	1775	4
PdWRKY7a	CAAT-box	TGCCAAC	1830	7	common cis-acting element in promoter and enhancer regions
PdWRKY7a	CAAT-box	CAAT	1875	4
PdWRKY7a	A-box	CCGTCC	1729	6	cis-acting regulatory element
PdWRKY7a	WRE3	CCACCT	733	6
PdWRKY7a	TC-rich repeats	GTTTTCTTAC	96	9	cis-acting element involved in defense and stress responsiveness
PdWRKY7a	TCA	TCATCTTCAT	191	9
PdWRKY7a	TCA	TCATCTTCAT	489	9
PdWRKY7a	W box	TTGACC	874	6
PdWRKY7a	W box	TTGACC	1316	6
PdWRKY7a	W box	TTGACC	1889	6
PdWRKY7a	AT~ABRE	TACGTGTC	1613	8
PdWRKY7a	STRE	AGGGG	1379	5
PdWRKY7a	STRE	AGGGG	1604	5
PdWRKY7a	Box 4	ATTAAT	397	6	part of a conserved DNA module involved in light responsiveness
PdWRKY7a	Box 4	ATTAAT	923	6	part of a conserved DNA module involved in light responsiveness
PdWRKY7a	Box 4	ATTAAT	1399	6	part of a conserved DNA module involved in light responsiveness
PdWRKY7a	Box 4	ATTAAT	1408	6	part of a conserved DNA module involved in light responsiveness
PdWRKY7a	LAMP-element	CCTTATCCA	435	9	part of a light responsive element
PdWRKY7a	LAMP-element	CCTTATCCA	1328	9	part of a light responsive element
PdWRKY7a	I-box	gGATAAGGTG	1329	9	part of a light responsive element
PdWRKY7a	G-box	TACGTG	331	6	cis-acting regulatory element involved in light responsiveness
PdWRKY7a	G-box	TACGTG	1615	6	cis-acting regulatory element involved in light responsiveness
PdWRKY7a	ABRE3a	TACGTG	331	6
PdWRKY7a	ABRE3a	TACGTG	1615	6
PdWRKY7a	O2-site	GATGACATGG	763	9	cis-acting regulatory element involved in zein metabolism regulation
PdWRKY7a	Unnamed__4	CTCC	87	4
PdWRKY7a	Unnamed__4	CTCC	306	4
PdWRKY7a	Unnamed__4	CTCC	375	4
PdWRKY7a	Unnamed__4	CTCC	403	4
PdWRKY7a	Unnamed__4	CTCC	546	4
PdWRKY7a	Unnamed__4	CTCC	578	4
PdWRKY7a	Unnamed__4	CTCC	581	4
PdWRKY7a	Unnamed__4	CTCC	694	4
PdWRKY7a	Unnamed__4	CTCC	1103	4
PdWRKY7a	Unnamed__4	CTCC	1203	4
PdWRKY7a	Unnamed__4	CTCC	1636	4
PdWRKY7a	Unnamed__4	CTCC	1689	4
PdWRKY7a	Unnamed__4	CTCC	1800	4
PdWRKY7a	Unnamed__4	CTCC	1809	4
PdWRKY7a	MBSI	TTTTTACGGTTA	701	11	MYB binding site involved in flavonoid biosynthetic genes regulation
PdWRKY7a	HD-Zip 3	GTAAT(G/C)ATTAC	1276	9.5	protein binding site
PdWRKY7a	TCA-element	TCAGAAGAGG	1308	9	cis-acting element involved in salicylic acid responsiveness
PdWRKY7a	TCA-element	CCATCTTTTT	1416	9	cis-acting element involved in salicylic acid responsiveness
PdWRKY7a	TCA-element	CCATCTTTTT	1628	9	cis-acting element involved in salicylic acid responsiveness
PdWRKY7a	LTR	CCGAAA	812	6	cis-acting element involved in low-temperature responsiveness
PdWRKY7a	LTR	CCGAAA	1160	6	cis-acting element involved in low-temperature responsiveness
PdWRKY7a	LTR	CCGAAA	1349	6	cis-acting element involved in low-temperature responsiveness
PdWRKY7a	LTR	CCGAAA	1437	6	cis-acting element involved in low-temperature responsiveness
PdWRKY7a	MYB	CAACCA	1677	6
PdWRKY7a	Myb	TAACTG	1130	6
PdWRKY7a	Unnamed__1	CGTGG	104	5
PdWRKY7a	Unnamed__1	CGTGG	1758	5
PdWRKY7a	Unnamed__1	CGTGG	1993	5
PdWRKY7a	ABRE4	CACGTA	331	6
PdWRKY7a	ABRE4	CACGTA	1615	6
PdWRKY7a	TATA-box	ATTATA	17	6	core promoter element around -30 of transcription start
PdWRKY7a	TATA-box	TATATAA	18	7	core promoter element around -30 of transcription start
PdWRKY7a	TATA-box	TATATA	19	6	core promoter element around -30 of transcription start
PdWRKY7a	TATA-box	ATATAT	20	6	core promoter element around -30 of transcription start
PdWRKY7a	TATA-box	TATA	21	4	core promoter element around -30 of transcription start
PdWRKY7a	TATA-box	TACAAAA	120	7	core promoter element around -30 of transcription start
PdWRKY7a	TATA-box	ATATAT	134	6	core promoter element around -30 of transcription start
PdWRKY7a	TATA-box	TATATA	135	6	core promoter element around -30 of transcription start
PdWRKY7a	TATA-box	TATA	137	4	core promoter element around -30 of transcription start
PdWRKY7a	TATA-box	ATATAA	177	6	core promoter element around -30 of transcription start
PdWRKY7a	TATA-box	TATA	178	4	core promoter element around -30 of transcription start
PdWRKY7a	TATA-box	ATATAT	288	6	core promoter element around -30 of transcription start
PdWRKY7a	TATA-box	TATA	289	4	core promoter element around -30 of transcription start
PdWRKY7a	TATA-box	TATTTAAA	294	8	core promoter element around -30 of transcription start
PdWRKY7a	TATA-box	TATA	647	4	core promoter element around -30 of transcription start
PdWRKY7a	TATA-box	TATA	962	4	core promoter element around -30 of transcription start
PdWRKY7a	TATA-box	ATATAA	1005	6	core promoter element around -30 of transcription start
PdWRKY7a	TATA-box	TATA	1006	4	core promoter element around -30 of transcription start
PdWRKY7a	TATA-box	TACAAAA	1029	7	core promoter element around -30 of transcription start
PdWRKY7a	TATA-box	TACAAAA	1298	7	core promoter element around -30 of transcription start
PdWRKY7a	TATA-box	TATA	1542	4	core promoter element around -30 of transcription start
PdWRKY7a	TATA-box	ATTATA	1843	6	core promoter element around -30 of transcription start
PdWRKY7a	TATA-box	TATAA	1844	5	core promoter element around -30 of transcription start
PdWRKY7a	TATA-box	TATA	1845	4	core promoter element around -30 of transcription start
PdWRKY7a	TATA-box	ATTATA	1849	6	core promoter element around -30 of transcription start
PdWRKY7a	TATA-box	TATAA	1850	5	core promoter element around -30 of transcription start
PdWRKY7a	TATA-box	TATA	1851	4	core promoter element around -30 of transcription start
PdWRKY7a	TATA-box	ATTATA	1855	6	core promoter element around -30 of transcription start
PdWRKY7a	TATA-box	TATAA	1856	5	core promoter element around -30 of transcription start
PdWRKY7a	TATA-box	TATA	1857	4	core promoter element around -30 of transcription start
PdWRKY7a	TATA-box	TACAAAA	1958	7	core promoter element around -30 of transcription start
PdWRKY7a	TATA-box	taTATAAAtc	1969	9	core promoter element around -30 of transcription start
PdWRKY7a	TATA-box	ccTATAAAaa	1971	9	core promoter element around -30 of transcription start
PdWRKY7a	TATA-box	TATAAAA	1972	7	core promoter element around -30 of transcription start
PdWRKY7a	TATA-box	TATAAA	1973	6	core promoter element around -30 of transcription start
PdWRKY7a	TATA-box	TATAA	1974	5	core promoter element around -30 of transcription start
PdWRKY7a	TATA-box	TATA	1975	4	core promoter element around -30 of transcription start
PdWRKY7a	CCGTCC-box	CCGTCC	1729	6
PdWRKY7a	ABRE	ACGTG	105	5	cis-acting element involved in the abscisic acid responsiveness
PdWRKY7a	ABRE	ACGTG	182	5	cis-acting element involved in the abscisic acid responsiveness
PdWRKY7a	ABRE	ACGTG	332	5	cis-acting element involved in the abscisic acid responsiveness
PdWRKY7a	ABRE	TACGTGTC	1613	8	cis-acting element involved in the abscisic acid responsiveness
PdWRKY7a	ABRE	ACGTG	1615	5	cis-acting element involved in the abscisic acid responsiveness
PdWRKY7a	G-Box	CACGTT	105	6	cis-acting regulatory element involved in light responsiveness
PdWRKY7a	G-Box	CACGTT	181	6	cis-acting regulatory element involved in light responsiveness
PdWRKY7a		motif_sequence	403	4	short_function
PdWRKY7a		motif_sequence	477	4	short_function
PdWRKY7a		motif_sequence	529	4	short_function
PdWRKY7a		motif_sequence	572	4	short_function
PdWRKY7a		motif_sequence	823	4	short_function
PdWRKY7a		motif_sequence	999	4	short_function
PdWRKY7a		motif_sequence	1020	4	short_function
PdWRKY7a		motif_sequence	1097	4	short_function
PdWRKY7a		motif_sequence	1743	4	short_function
PdWRKY7a		motif_sequence	1866	4	short_function
PdWRKY7a		motif_sequence	1955	4	short_function
PdWRKY7a	circadian	CAAAGATATC	1649	9	cis-acting regulatory element involved in circadian control
PdWRKY7a	DRE core	GCCGAC	738	6
PdWRKY7a	ARE	AAACCA	671	6	cis-acting regulatory element essential for the anaerobic induction
PdWRKY7a	ARE	AAACCA	760	6	cis-acting regulatory element essential for the anaerobic induction
PdWRKY7a	ARE	AAACCA	1990	6	cis-acting regulatory element essential for the anaerobic induction
PdWRKY7a	CAT-box	GCCACT	1811	6	cis-acting regulatory element related to meristem expression
PdWRKY7a	AT-rich element	ATAGAAATCAA	1967	10	binding site of AT-rich DNA binding protein (ATBP-1)
PdWRKY7a	GT1-motif	GGTTAA	1148	6	light responsive element
PdWRKY7a	MYC	CATTTG	605	6
PdWRKY7a	MYC	CATGTG	764	6
PdWRKY7a	AT~TATA-box	TATATA	19	6
PdWRKY7a	AT~TATA-box	TATATA	135	6
PdWRKY7b	A-box	CCGTCC	1729	6	cis-acting regulatory element
PdWRKY7b	CAAT-box	CAAT	30	4
PdWRKY7b	CAAT-box	CAAT	71	4
PdWRKY7b	CAAT-box	CAAT	129	4
PdWRKY7b	CAAT-box	CAAT	146	4
PdWRKY7b	CAAT-box	CAAT	151	4
PdWRKY7b	CAAT-box	CAAT	201	4
PdWRKY7b	CAAT-box	CAAT	225	4
PdWRKY7b	CAAT-box	CAAT	382	4
PdWRKY7b	CAAT-box	CAAT	446	4
PdWRKY7b	CAAT-box	CCAAT	548	5	common cis-acting element in promoter and enhancer regions
PdWRKY7b	CAAT-box	CAAT	549	4
PdWRKY7b	CAAT-box	CAAAT	551	5	common cis-acting element in promoter and enhancer regions
PdWRKY7b	CAAT-box	CAAT	589	4
PdWRKY7b	CAAT-box	CAAAT	605	5	common cis-acting element in promoter and enhancer regions
PdWRKY7b	CAAT-box	CCAAT	772	5	common cis-acting element in promoter and enhancer regions
PdWRKY7b	CAAT-box	CAAT	773	4
PdWRKY7b	CAAT-box	CAAT	804	4
PdWRKY7b	CAAT-box	CCAAT	808	5	common cis-acting element in promoter and enhancer regions
PdWRKY7b	CAAT-box	CAAT	809	4
PdWRKY7b	CAAT-box	CAAT	905	4
PdWRKY7b	CAAT-box	CAAT	950	4
PdWRKY7b	CAAT-box	CAAT	982	4
PdWRKY7b	CAAT-box	CCAAT	1014	5	common cis-acting element in promoter and enhancer regions
PdWRKY7b	CAAT-box	CAAT	1015	4
PdWRKY7b	CAAT-box	CAAT	1025	4
PdWRKY7b	CAAT-box	CAAT	1038	4
PdWRKY7b	CAAT-box	CAAT	1092	4
PdWRKY7b	CAAT-box	CAAT	1215	4
PdWRKY7b	CAAT-box	CAAT	1240	4
PdWRKY7b	CAAT-box	CAAT	1325	4
PdWRKY7b	CAAT-box	CCAAT	1359	5	common cis-acting element in promoter and enhancer regions
PdWRKY7b	CAAT-box	CAAAT	1396	5	common cis-acting element in promoter and enhancer regions
PdWRKY7b	CAAT-box	CAAT	1447	4
PdWRKY7b	CAAT-box	CAAT	1775	4
PdWRKY7b	CAAT-box	TGCCAAC	1830	7	common cis-acting element in promoter and enhancer regions
PdWRKY7b	CAAT-box	CAAT	1875	4
PdWRKY7b	WRE3	CCACCT	733	6
PdWRKY7b	GATA-motif	AAGGATAAGG	435	9	part of a light responsive element
PdWRKY7b	GATA-motif	AAGGATAAGG	1327	9	part of a light responsive element
PdWRKY7b	GATA-motif	AAGATAAGATT	1860	10	part of a light responsive element
PdWRKY7b	CCGTCC motif	CCGTCC	1729	6
PdWRKY7b	TGA-element	AACGAC	1504	6	auxin-responsive element
PdWRKY7b	AT~ABRE	TACGTGTC	1613	8
PdWRKY7b	W box	TTGACC	874	6
PdWRKY7b	W box	TTGACC	1316	6
PdWRKY7b	W box	TTGACC	1889	6
PdWRKY7b	TC-rich repeats	GTTTTCTTAC	96	9	cis-acting element involved in defense and stress responsiveness
PdWRKY7b	TCA	TCATCTTCAT	191	9
PdWRKY7b	TCA	TCATCTTCAT	489	9
PdWRKY7b	Box 4	ATTAAT	397	6	part of a conserved DNA module involved in light responsiveness
PdWRKY7b	Box 4	ATTAAT	923	6	part of a conserved DNA module involved in light responsiveness
PdWRKY7b	Box 4	ATTAAT	1399	6	part of a conserved DNA module involved in light responsiveness
PdWRKY7b	Box 4	ATTAAT	1408	6	part of a conserved DNA module involved in light responsiveness
PdWRKY7b	STRE	AGGGG	1379	5
PdWRKY7b	STRE	AGGGG	1604	5
PdWRKY7b	MBSI	TTTTTACGGTTA	701	11	MYB binding site involved in flavonoid biosynthetic genes regulation
PdWRKY7b	O2-site	GATGACATGG	763	9	cis-acting regulatory element involved in zein metabolism regulation
PdWRKY7b	Unnamed__4	CTCC	87	4
PdWRKY7b	Unnamed__4	CTCC	306	4
PdWRKY7b	Unnamed__4	CTCC	375	4
PdWRKY7b	Unnamed__4	CTCC	403	4
PdWRKY7b	Unnamed__4	CTCC	546	4
PdWRKY7b	Unnamed__4	CTCC	578	4
PdWRKY7b	Unnamed__4	CTCC	581	4
PdWRKY7b	Unnamed__4	CTCC	694	4
PdWRKY7b	Unnamed__4	CTCC	1103	4
PdWRKY7b	Unnamed__4	CTCC	1203	4
PdWRKY7b	Unnamed__4	CTCC	1636	4
PdWRKY7b	Unnamed__4	CTCC	1689	4
PdWRKY7b	Unnamed__4	CTCC	1800	4
PdWRKY7b	Unnamed__4	CTCC	1809	4
PdWRKY7b	ABRE3a	TACGTG	331	6
PdWRKY7b	ABRE3a	TACGTG	1615	6
PdWRKY7b	TCA-element	TCAGAAGAGG	1308	9	cis-acting element involved in salicylic acid responsiveness
PdWRKY7b	TCA-element	CCATCTTTTT	1416	9	cis-acting element involved in salicylic acid responsiveness
PdWRKY7b	TCA-element	CCATCTTTTT	1628	9	cis-acting element involved in salicylic acid responsiveness
PdWRKY7b	HD-Zip 3	GTAAT(G/C)ATTAC	1276	9.5	protein binding site
PdWRKY7b	I-box	gGATAAGGTG	1329	9	part of a light responsive element
PdWRKY7b	LAMP-element	CCTTATCCA	435	9	part of a light responsive element
PdWRKY7b	LAMP-element	CCTTATCCA	1328	9	part of a light responsive element
PdWRKY7b	G-box	TACGTG	331	6	cis-acting regulatory element involved in light responsiveness
PdWRKY7b	G-box	TACGTG	1615	6	cis-acting regulatory element involved in light responsiveness
PdWRKY7b	LTR	CCGAAA	812	6	cis-acting element involved in low-temperature responsiveness
PdWRKY7b	LTR	CCGAAA	1160	6	cis-acting element involved in low-temperature responsiveness
PdWRKY7b	LTR	CCGAAA	1349	6	cis-acting element involved in low-temperature responsiveness
PdWRKY7b	LTR	CCGAAA	1437	6	cis-acting element involved in low-temperature responsiveness
PdWRKY7b	TATA-box	ATTATA	17	6	core promoter element around -30 of transcription start
PdWRKY7b	TATA-box	TATATAA	18	7	core promoter element around -30 of transcription start
PdWRKY7b	TATA-box	TATATA	19	6	core promoter element around -30 of transcription start
PdWRKY7b	TATA-box	ATATAT	20	6	core promoter element around -30 of transcription start
PdWRKY7b	TATA-box	TATA	21	4	core promoter element around -30 of transcription start
PdWRKY7b	TATA-box	TACAAAA	120	7	core promoter element around -30 of transcription start
PdWRKY7b	TATA-box	ATATAT	134	6	core promoter element around -30 of transcription start
PdWRKY7b	TATA-box	TATATA	135	6	core promoter element around -30 of transcription start
PdWRKY7b	TATA-box	TATA	137	4	core promoter element around -30 of transcription start
PdWRKY7b	TATA-box	ATATAA	177	6	core promoter element around -30 of transcription start
PdWRKY7b	TATA-box	TATA	178	4	core promoter element around -30 of transcription start
PdWRKY7b	TATA-box	ATATAT	288	6	core promoter element around -30 of transcription start
PdWRKY7b	TATA-box	TATA	289	4	core promoter element around -30 of transcription start
PdWRKY7b	TATA-box	TATTTAAA	294	8	core promoter element around -30 of transcription start
PdWRKY7b	TATA-box	TATA	647	4	core promoter element around -30 of transcription start
PdWRKY7b	TATA-box	TATA	962	4	core promoter element around -30 of transcription start
PdWRKY7b	TATA-box	ATATAA	1005	6	core promoter element around -30 of transcription start
PdWRKY7b	TATA-box	TATA	1006	4	core promoter element around -30 of transcription start
PdWRKY7b	TATA-box	TACAAAA	1029	7	core promoter element around -30 of transcription start
PdWRKY7b	TATA-box	TACAAAA	1298	7	core promoter element around -30 of transcription start
PdWRKY7b	TATA-box	TATA	1542	4	core promoter element around -30 of transcription start
PdWRKY7b	TATA-box	ATTATA	1843	6	core promoter element around -30 of transcription start
PdWRKY7b	TATA-box	TATAA	1844	5	core promoter element around -30 of transcription start
PdWRKY7b	TATA-box	TATA	1845	4	core promoter element around -30 of transcription start
PdWRKY7b	TATA-box	ATTATA	1849	6	core promoter element around -30 of transcription start
PdWRKY7b	TATA-box	TATAA	1850	5	core promoter element around -30 of transcription start
PdWRKY7b	TATA-box	TATA	1851	4	core promoter element around -30 of transcription start
PdWRKY7b	TATA-box	ATTATA	1855	6	core promoter element around -30 of transcription start
PdWRKY7b	TATA-box	TATAA	1856	5	core promoter element around -30 of transcription start
PdWRKY7b	TATA-box	TATA	1857	4	core promoter element around -30 of transcription start
PdWRKY7b	TATA-box	TACAAAA	1958	7	core promoter element around -30 of transcription start
PdWRKY7b	TATA-box	taTATAAAtc	1969	9	core promoter element around -30 of transcription start
PdWRKY7b	TATA-box	ccTATAAAaa	1971	9	core promoter element around -30 of transcription start
PdWRKY7b	TATA-box	TATAAAA	1972	7	core promoter element around -30 of transcription start
PdWRKY7b	TATA-box	TATAAA	1973	6	core promoter element around -30 of transcription start
PdWRKY7b	TATA-box	TATAA	1974	5	core promoter element around -30 of transcription start
PdWRKY7b	TATA-box	TATA	1975	4	core promoter element around -30 of transcription start
PdWRKY7b	CCGTCC-box	CCGTCC	1729	6
PdWRKY7b	ABRE	ACGTG	105	5	cis-acting element involved in the abscisic acid responsiveness
PdWRKY7b	ABRE	ACGTG	182	5	cis-acting element involved in the abscisic acid responsiveness
PdWRKY7b	ABRE	ACGTG	332	5	cis-acting element involved in the abscisic acid responsiveness
PdWRKY7b	ABRE	TACGTGTC	1613	8	cis-acting element involved in the abscisic acid responsiveness
PdWRKY7b	ABRE	ACGTG	1615	5	cis-acting element involved in the abscisic acid responsiveness
PdWRKY7b	G-Box	CACGTT	105	6	cis-acting regulatory element involved in light responsiveness
PdWRKY7b	G-Box	CACGTT	181	6	cis-acting regulatory element involved in light responsiveness
PdWRKY7b		motif_sequence	403	4	short_function
PdWRKY7b		motif_sequence	477	4	short_function
PdWRKY7b		motif_sequence	529	4	short_function
PdWRKY7b		motif_sequence	572	4	short_function
PdWRKY7b		motif_sequence	823	4	short_function
PdWRKY7b		motif_sequence	999	4	short_function
PdWRKY7b		motif_sequence	1020	4	short_function
PdWRKY7b		motif_sequence	1097	4	short_function
PdWRKY7b		motif_sequence	1743	4	short_function
PdWRKY7b		motif_sequence	1866	4	short_function
PdWRKY7b		motif_sequence	1955	4	short_function
PdWRKY7b	MYB	CAACCA	1677	6
PdWRKY7b	Myb	TAACTG	1130	6
PdWRKY7b	ABRE4	CACGTA	331	6
PdWRKY7b	ABRE4	CACGTA	1615	6
PdWRKY7b	Unnamed__1	CGTGG	104	5
PdWRKY7b	Unnamed__1	CGTGG	1758	5
PdWRKY7b	Unnamed__1	CGTGG	1993	5
PdWRKY7b	ARE	AAACCA	671	6	cis-acting regulatory element essential for the anaerobic induction
PdWRKY7b	ARE	AAACCA	760	6	cis-acting regulatory element essential for the anaerobic induction
PdWRKY7b	ARE	AAACCA	1990	6	cis-acting regulatory element essential for the anaerobic induction
PdWRKY7b	DRE core	GCCGAC	738	6
PdWRKY7b	circadian	CAAAGATATC	1649	9	cis-acting regulatory element involved in circadian control
PdWRKY7b	AT~TATA-box	TATATA	19	6
PdWRKY7b	AT~TATA-box	TATATA	135	6
PdWRKY7b	AT-rich element	ATAGAAATCAA	1967	10	binding site of AT-rich DNA binding protein (ATBP-1)
PdWRKY7b	CAT-box	GCCACT	1811	6	cis-acting regulatory element related to meristem expression
PdWRKY7b	MYC	CATTTG	605	6
PdWRKY7b	MYC	CATGTG	764	6
PdWRKY7b	GT1-motif	GGTTAA	1148	6	light responsive element
PdWRKY8	MYB-like sequence	TAACCA	564	6
PdWRKY8	MYB-like sequence	TAACCA	1791	6
PdWRKY8	CAT-box	GCCACT	982	6	cis-acting regulatory element related to meristem expression
PdWRKY8	ARE	AAACCA	33	6	cis-acting regulatory element essential for the anaerobic induction
PdWRKY8	ARE	AAACCA	328	6	cis-acting regulatory element essential for the anaerobic induction
PdWRKY8	ARE	AAACCA	1432	6	cis-acting regulatory element essential for the anaerobic induction
PdWRKY8	Myc	TCTCTTA	371	7
PdWRKY8	Myc	TCTCTTA	1189	7
PdWRKY8	Myc	TCTCTTA	1302	7
PdWRKY8	DRE core	GCCGAC	802	6
PdWRKY8	3-AF1 binding site	TAAGAGAGGAA	367	11	light responsive element
PdWRKY8	CGTCA-motif	CGTCA	1548	5	cis-acting regulatory element involved in the MeJA-responsiveness
PdWRKY8	CGTCA-motif	CGTCA	1677	5	cis-acting regulatory element involved in the MeJA-responsiveness
PdWRKY8	CGTCA-motif	CGTCA	1693	5	cis-acting regulatory element involved in the MeJA-responsiveness
PdWRKY8	box S	AGCCACC	843	7
PdWRKY8	box S	AGCCACC	1515	7
PdWRKY8	box S	AGCCACC	1809	7
PdWRKY8	Unnamed__8	TCCACGTAGA	1866	9
PdWRKY8	Unnamed__10	TCCACGTAGA	1866	9
PdWRKY8	TATA-box	TATA	118	4	core promoter element around -30 of transcription start
PdWRKY8	TATA-box	TATA	231	4	core promoter element around -30 of transcription start
PdWRKY8	TATA-box	TATAA	375	5	core promoter element around -30 of transcription start
PdWRKY8	TATA-box	TATA	376	4	core promoter element around -30 of transcription start
PdWRKY8	TATA-box	TATA	398	4	core promoter element around -30 of transcription start
PdWRKY8	TATA-box	TATAAA	480	6	core promoter element around -30 of transcription start
PdWRKY8	TATA-box	TATAA	481	5	core promoter element around -30 of transcription start
PdWRKY8	TATA-box	TATA	482	4	core promoter element around -30 of transcription start
PdWRKY8	TATA-box	TATACA	496	6	core promoter element around -30 of transcription start
PdWRKY8	TATA-box	TATA	498	4	core promoter element around -30 of transcription start
PdWRKY8	TATA-box	TATAAA	509	6	core promoter element around -30 of transcription start
PdWRKY8	TATA-box	TATAA	510	5	core promoter element around -30 of transcription start
PdWRKY8	TATA-box	TATA	511	4	core promoter element around -30 of transcription start
PdWRKY8	TATA-box	TACAAAA	720	7	core promoter element around -30 of transcription start
PdWRKY8	TATA-box	TATACA	933	6	core promoter element around -30 of transcription start
PdWRKY8	TATA-box	TATA	935	4	core promoter element around -30 of transcription start
PdWRKY8	TATA-box	TATA	1036	4	core promoter element around -30 of transcription start
PdWRKY8	TATA-box	ATTATA	1197	6	core promoter element around -30 of transcription start
PdWRKY8	TATA-box	TATAA	1198	5	core promoter element around -30 of transcription start
PdWRKY8	TATA-box	TATA	1199	4	core promoter element around -30 of transcription start
PdWRKY8	TATA-box	TATA	1282	4	core promoter element around -30 of transcription start
PdWRKY8	TATA-box	ATATAT	1295	6	core promoter element around -30 of transcription start
PdWRKY8	TATA-box	TATA	1296	4	core promoter element around -30 of transcription start
PdWRKY8	TATA-box	taTATAAAtc	1319	9	core promoter element around -30 of transcription start
PdWRKY8	TATA-box	ATATAA	1324	6	core promoter element around -30 of transcription start
PdWRKY8	TATA-box	TATA	1325	4	core promoter element around -30 of transcription start
PdWRKY8	TATA-box	ATATAA	1750	6	core promoter element around -30 of transcription start
PdWRKY8	TATA-box	TATA	1751	4	core promoter element around -30 of transcription start
PdWRKY8	TATA-box	TATA	1856	4	core promoter element around -30 of transcription start
PdWRKY8	TATA-box	TATAAAT	1899	7	core promoter element around -30 of transcription start
PdWRKY8	TATA-box	TATAAA	1900	6	core promoter element around -30 of transcription start
PdWRKY8	TATA-box	TATAA	1901	5	core promoter element around -30 of transcription start
PdWRKY8	TATA-box	TATA	1902	4	core promoter element around -30 of transcription start
PdWRKY8	TATA-box	TATA	1935	4	core promoter element around -30 of transcription start
PdWRKY8		motif_sequence	98	4	short_function
PdWRKY8		motif_sequence	321	4	short_function
PdWRKY8		motif_sequence	355	4	short_function
PdWRKY8		motif_sequence	596	4	short_function
PdWRKY8		motif_sequence	887	4	short_function
PdWRKY8		motif_sequence	939	4	short_function
PdWRKY8	G-Box	CACGTT	1374	6	cis-acting regulatory element involved in light responsiveness
PdWRKY8	ABRE	ACGTG	1375	5	cis-acting element involved in the abscisic acid responsiveness
PdWRKY8	MYB	TAACCA	564	6
PdWRKY8	MYB	CAACAG	977	6
PdWRKY8	MYB	TAACCA	1791	6
PdWRKY8	Myb	CAACTG	457	6
PdWRKY8	Myb	TAACTG	1801	6
PdWRKY8	Myb	CAACTG	1879	6
PdWRKY8	Unnamed__1	GAATTTAATTAA	905	11	60K protein binding site
PdWRKY8	Unnamed__14	TCCACGTAGA	1866	9
PdWRKY8	Myb-binding site	CAACAG	977	6
PdWRKY8	MBS	CAACTG	457	6	MYB binding site involved in drought-inducibility
PdWRKY8	MBS	CAACTG	1879	6	MYB binding site involved in drought-inducibility
PdWRKY8	NON-box	AGATCGACG	1477	9	cis-acting regulatory element related to meristem specific activation
PdWRKY8	as-1	TGACG	1548	5
PdWRKY8	as-1	TGACG	1677	5
PdWRKY8	as-1	TGACG	1693	5
PdWRKY8	GA-motif	ATAGATAA	1235	8	part of a light responsive element
PdWRKY8	Unnamed__4	CTCC	95	4
PdWRKY8	Unnamed__4	CTCC	265	4
PdWRKY8	Unnamed__4	CTCC	274	4
PdWRKY8	Unnamed__4	CTCC	814	4
PdWRKY8	Unnamed__4	CTCC	820	4
PdWRKY8	Unnamed__4	CTCC	1635	4
PdWRKY8	Unnamed__4	CTCC	1713	4
PdWRKY8	Unnamed__4	CTCC	1759	4
PdWRKY8	ATCT-motif	AATCTAATCC	639	9	part of a conserved DNA module involved in light responsiveness
PdWRKY8	ATCT-motif	AATCTAATCC	1737	9	part of a conserved DNA module involved in light responsiveness
PdWRKY8	TCA-element	CCATCTTTTT	1715	9	cis-acting element involved in salicylic acid responsiveness
PdWRKY8	ERE	ATTTCATA	1962	8
PdWRKY8	GCN4_motif	TGAGTCA	1378	7	cis-regulatory element involved in endosperm expression
PdWRKY8	TGACG-motif	TGACG	1548	5	cis-acting regulatory element involved in the MeJA-responsiveness
PdWRKY8	TGACG-motif	TGACG	1677	5	cis-acting regulatory element involved in the MeJA-responsiveness
PdWRKY8	TGACG-motif	TGACG	1693	5	cis-acting regulatory element involved in the MeJA-responsiveness
PdWRKY8	Unnamed__12	TCCACGTAGA	1866	9
PdWRKY8	Box 4	ATTAAT	676	6	part of a conserved DNA module involved in light responsiveness
PdWRKY8	Box 4	ATTAAT	904	6	part of a conserved DNA module involved in light responsiveness
PdWRKY8	Box 4	ATTAAT	1396	6	part of a conserved DNA module involved in light responsiveness
PdWRKY8	STRE	AGGGG	1202	5
PdWRKY8	CAAT-box	CAAT	4	4
PdWRKY8	CAAT-box	CAAAT	19	5	common cis-acting element in promoter and enhancer regions
PdWRKY8	CAAT-box	CAAT	142	4
PdWRKY8	CAAT-box	CAAT	160	4
PdWRKY8	CAAT-box	CAAT	173	4
PdWRKY8	CAAT-box	CAAT	182	4
PdWRKY8	CAAT-box	CCAAT	202	5	common cis-acting element in promoter and enhancer regions
PdWRKY8	CAAT-box	CAAT	209	4
PdWRKY8	CAAT-box	AGCTCAATTTCA	243	11	common cis-acting element in promoter and enhancer regions
PdWRKY8	CAAT-box	CAAT	247	4
PdWRKY8	CAAT-box	CAAT	256	4
PdWRKY8	CAAT-box	CAAT	270	4
PdWRKY8	CAAT-box	CAAAT	325	5	common cis-acting element in promoter and enhancer regions
PdWRKY8	CAAT-box	CAAAT	339	5	common cis-acting element in promoter and enhancer regions
PdWRKY8	CAAT-box	CAAT	395	4
PdWRKY8	CAAT-box	CAAAT	417	5	common cis-acting element in promoter and enhancer regions
PdWRKY8	CAAT-box	CAAT	452	4
PdWRKY8	CAAT-box	CAAT	494	4
PdWRKY8	CAAT-box	CCAAT	529	5	common cis-acting element in promoter and enhancer regions
PdWRKY8	CAAT-box	CAAT	543	4
PdWRKY8	CAAT-box	CAAT	835	4
PdWRKY8	CAAT-box	CAAT	881	4
PdWRKY8	CAAT-box	CAAAT	913	5	common cis-acting element in promoter and enhancer regions
PdWRKY8	CAAT-box	CAAT	946	4
PdWRKY8	CAAT-box	CCAAT	953	5	common cis-acting element in promoter and enhancer regions
PdWRKY8	CAAT-box	CAAT	1013	4
PdWRKY8	CAAT-box	CAAT	1023	4
PdWRKY8	CAAT-box	CAAT	1030	4
PdWRKY8	CAAT-box	CAAT	1046	4
PdWRKY8	CAAT-box	CAAAT	1065	5	common cis-acting element in promoter and enhancer regions
PdWRKY8	CAAT-box	CAAT	1125	4
PdWRKY8	CAAT-box	CAAT	1320	4
PdWRKY8	CAAT-box	CAAT	1347	4
PdWRKY8	CAAT-box	CAAT	1383	4
PdWRKY8	CAAT-box	CAAAT	1630	5	common cis-acting element in promoter and enhancer regions
PdWRKY8	CAAT-box	CAAAT	1641	5	common cis-acting element in promoter and enhancer regions
PdWRKY8	CAAT-box	CAAAT	1739	5	common cis-acting element in promoter and enhancer regions
PdWRKY8	CAAT-box	CAAAT	1744	5	common cis-acting element in promoter and enhancer regions
PdWRKY8	CAAT-box	CAAAT	1830	5	common cis-acting element in promoter and enhancer regions
PdWRKY8	CAAT-box	CAAT	1833	4
PdWRKY8	CAAT-box	CCAAT	1841	5	common cis-acting element in promoter and enhancer regions
PdWRKY8	CAAT-box	CAAT	1969	4
PdWRKY8	WRE3	CCACCT	810	6
PdWRKY8	WRE3	CCACCT	1172	6
PdWRKY8	WRE3	CCACCT	1517	6
PdWRKY8	AAGAA-motif	gGTAAAGAAA	1079	9
PdWRKY8	AAGAA-motif	GAAAGAA	1602	7
PdWRKY8	AAGAA-motif	GAAAGAA	1621	7
PdWRKY8	TGA-element	AACGAC	39	6	auxin-responsive element
PdWRKY8	TGA-element	AACGAC	57	6	auxin-responsive element
PdWRKY8	TGA-element	AACGAC	69	6	auxin-responsive element
PdWRKY9	LTR	CCGAAA	540	6	cis-acting element involved in low-temperature responsiveness
PdWRKY9	GA-motif	ATAGATAA	116	8	part of a light responsive element
PdWRKY9	as-1	TGACG	486	5
PdWRKY9	as-1	TGACG	1247	5
PdWRKY9	Unnamed__4	CTCC	386	4
PdWRKY9	Unnamed__4	CTCC	412	4
PdWRKY9	Unnamed__4	CTCC	418	4
PdWRKY9	Unnamed__4	CTCC	450	4
PdWRKY9	Unnamed__4	CTCC	473	4
PdWRKY9	Unnamed__4	CTCC	793	4
PdWRKY9	Unnamed__4	CTCC	969	4
PdWRKY9	Unnamed__4	CTCC	1968	4
PdWRKY9	O2-site	GATGATGTGG	1635	9	cis-acting regulatory element involved in zein metabolism regulation
PdWRKY9	O2-site	GATGA(C/T)(A/G)TG(A/G)	1783	8	cis-acting regulatory element involved in zein metabolism regulation
PdWRKY9	G-box	CACGAC	297	6	cis-acting regulatory element involved in light responsiveness
PdWRKY9	ACE	CTAACGTATT	889	9	cis-acting element involved in light responsiveness
PdWRKY9	GCN4_motif	TGAGTCA	1342	7	cis-regulatory element involved in endosperm expression
PdWRKY9	P-box	CCTTTTG	1228	7	gibberellin-responsive element
PdWRKY9	STRE	AGGGG	586	5
PdWRKY9	STRE	AGGGG	922	5
PdWRKY9	STRE	AGGGG	1305	5
PdWRKY9	CCAAT-box	CAACGG	1001	6	MYBHv1 binding site
PdWRKY9	CCAAT-box	CAACGG	1135	6	MYBHv1 binding site
PdWRKY9	TGACG-motif	TGACG	486	5	cis-acting regulatory element involved in the MeJA-responsiveness
PdWRKY9	TGACG-motif	TGACG	1247	5	cis-acting regulatory element involved in the MeJA-responsiveness
PdWRKY9	CAAT-box	CAAT	25	4
PdWRKY9	CAAT-box	CAAAT	77	5	common cis-acting element in promoter and enhancer regions
PdWRKY9	CAAT-box	CAAT	93	4
PdWRKY9	CAAT-box	CAAT	162	4
PdWRKY9	CAAT-box	CAAT	231	4
PdWRKY9	CAAT-box	CAAT	431	4
PdWRKY9	CAAT-box	CAAAT	789	5	common cis-acting element in promoter and enhancer regions
PdWRKY9	CAAT-box	CAAT	836	4
PdWRKY9	CAAT-box	CAAT	863	4
PdWRKY9	CAAT-box	CAAAT	928	5	common cis-acting element in promoter and enhancer regions
PdWRKY9	CAAT-box	CAAT	979	4
PdWRKY9	CAAT-box	CAAAT	991	5	common cis-acting element in promoter and enhancer regions
PdWRKY9	CAAT-box	CAAT	1008	4
PdWRKY9	CAAT-box	CAAAT	1210	5	common cis-acting element in promoter and enhancer regions
PdWRKY9	CAAT-box	CAAT	1253	4
PdWRKY9	CAAT-box	CAAT	1257	4
PdWRKY9	CAAT-box	CAAT	1263	4
PdWRKY9	CAAT-box	CAAT	1269	4
PdWRKY9	CAAT-box	CAAT	1279	4
PdWRKY9	CAAT-box	CAAAT	1319	5	common cis-acting element in promoter and enhancer regions
PdWRKY9	CAAT-box	CAAT	1526	4
PdWRKY9	CAAT-box	CAAT	1682	4
PdWRKY9	CAAT-box	CAAT	1684	4
PdWRKY9	CAAT-box	CAAAT	1704	5	common cis-acting element in promoter and enhancer regions
PdWRKY9	CAAT-box	CAAAT	1761	5	common cis-acting element in promoter and enhancer regions
PdWRKY9	CAAT-box	CAAT	1926	4
PdWRKY9	CAAT-box	CAAT	1942	4
PdWRKY9	TGA-element	AACGAC	630	6	auxin-responsive element
PdWRKY9	TGA-element	AACGAC	636	6	auxin-responsive element
PdWRKY9	TGA-element	AACGAC	667	6	auxin-responsive element
PdWRKY9	TGA-element	AACGAC	713	6	auxin-responsive element
PdWRKY9	GATA-motif	AAGGATAAGG	756	9	part of a light responsive element
PdWRKY9	GATA-motif	AAGATAAGATT	1037	10	part of a light responsive element
PdWRKY9	MYB-like sequence	TAACCA	37	6
PdWRKY9	MYB-like sequence	TAACCA	821	6
PdWRKY9	MYB-like sequence	TAACCA	1168	6
PdWRKY9	AT~TATA-box	TATATA	614	6
PdWRKY9	AT~TATA-box	TATATA	1628	6
PdWRKY9	MYC	CATGTG	1508	6
PdWRKY9	MYC	CAATTG	1682	6
PdWRKY9	MYC	CATTTG	1704	6
PdWRKY9	GT1-motif	GGTTAA	822	6	light responsive element
PdWRKY9	GT1-motif	GGTTAAT	1169	7	light responsive element
PdWRKY9	ARE	AAACCA	1088	6	cis-acting regulatory element essential for the anaerobic induction
PdWRKY9	ARE	AAACCA	1369	6	cis-acting regulatory element essential for the anaerobic induction
PdWRKY9	ARE	AAACCA	1650	6	cis-acting regulatory element essential for the anaerobic induction
PdWRKY9	ARE	AAACCA	1867	6	cis-acting regulatory element essential for the anaerobic induction
PdWRKY9	CARE	CAACTCAC	1669	8
PdWRKY9	DRE core	GCCGAC	168	6
PdWRKY9	DRE core	GCCGAC	389	6
PdWRKY9	DRE core	GCCGAC	465	6
PdWRKY9	CGTCA-motif	CGTCA	486	5	cis-acting regulatory element involved in the MeJA-responsiveness
PdWRKY9	CGTCA-motif	CGTCA	1247	5	cis-acting regulatory element involved in the MeJA-responsiveness
PdWRKY9	box S	AGCCACC	527	7
PdWRKY9		motif_sequence	212	4	short_function
PdWRKY9		motif_sequence	238	4	short_function
PdWRKY9		motif_sequence	448	4	short_function
PdWRKY9		motif_sequence	471	4	short_function
PdWRKY9		motif_sequence	534	4	short_function
PdWRKY9		motif_sequence	569	4	short_function
PdWRKY9		motif_sequence	798	4	short_function
PdWRKY9		motif_sequence	963	4	short_function
PdWRKY9		motif_sequence	1196	4	short_function
PdWRKY9		motif_sequence	1509	4	short_function
PdWRKY9		motif_sequence	1529	4	short_function
PdWRKY9		motif_sequence	1547	4	short_function
PdWRKY9		motif_sequence	1811	4	short_function
PdWRKY9		motif_sequence	1886	4	short_function
PdWRKY9	ABRE	ACGTG	130	5	cis-acting element involved in the abscisic acid responsiveness
PdWRKY9	ABRE	ACGTG	270	5	cis-acting element involved in the abscisic acid responsiveness
PdWRKY9	ABRE	ACGTG	337	5	cis-acting element involved in the abscisic acid responsiveness
PdWRKY9	ABRE	TACGGTC	364	7	cis-acting element involved in the abscisic acid responsiveness
PdWRKY9	ABRE	ACGTG	1541	5	cis-acting element involved in the abscisic acid responsiveness
PdWRKY9	G-Box	CACGTT	129	6	cis-acting regulatory element involved in light responsiveness
PdWRKY9	G-Box	CACGTT	269	6	cis-acting regulatory element involved in light responsiveness
PdWRKY9	G-Box	CACGTT	336	6	cis-acting regulatory element involved in light responsiveness
PdWRKY9	G-Box	CACGTT	1540	6	cis-acting regulatory element involved in light responsiveness
PdWRKY9	TATA-box	TATA	2	4	core promoter element around -30 of transcription start
PdWRKY9	TATA-box	TACATAAA	81	8	core promoter element around -30 of transcription start
PdWRKY9	TATA-box	TATAAGAA	138	8	core promoter element around -30 of transcription start
PdWRKY9	TATA-box	TATAA	141	5	core promoter element around -30 of transcription start
PdWRKY9	TATA-box	TATA	142	4	core promoter element around -30 of transcription start
PdWRKY9	TATA-box	ATATAT	613	6	core promoter element around -30 of transcription start
PdWRKY9	TATA-box	TATATA	614	6	core promoter element around -30 of transcription start
PdWRKY9	TATA-box	ATATAT	615	6	core promoter element around -30 of transcription start
PdWRKY9	TATA-box	TATA	616	4	core promoter element around -30 of transcription start
PdWRKY9	TATA-box	TATAA	815	5	core promoter element around -30 of transcription start
PdWRKY9	TATA-box	TATA	816	4	core promoter element around -30 of transcription start
PdWRKY9	TATA-box	TATAA	840	5	core promoter element around -30 of transcription start
PdWRKY9	TATA-box	TATA	841	4	core promoter element around -30 of transcription start
PdWRKY9	TATA-box	ccTATAAAaa	1478	9	core promoter element around -30 of transcription start
PdWRKY9	TATA-box	TATA	1480	4	core promoter element around -30 of transcription start
PdWRKY9	TATA-box	ATATAT	1627	6	core promoter element around -30 of transcription start
PdWRKY9	TATA-box	TATATA	1628	6	core promoter element around -30 of transcription start
PdWRKY9	TATA-box	ATATAA	1629	6	core promoter element around -30 of transcription start
PdWRKY9	TATA-box	TATA	1630	4	core promoter element around -30 of transcription start
PdWRKY9	TATA-box	ATATAT	1993	6	core promoter element around -30 of transcription start
PdWRKY9	TATA-box	TATA	1994	4	core promoter element around -30 of transcription start
PdWRKY9	MYB recognition site	CCGTTG	1001	6
PdWRKY9	MYB recognition site	CCGTTG	1135	6
PdWRKY9	JERE	AGACCGCC	171	8
PdWRKY9	MYB	TAACCA	37	6
PdWRKY9	MYB	CAACAG	180	6
PdWRKY9	MYB	TAACCA	821	6
PdWRKY9	MYB	TAACCA	1168	6
PdWRKY9	MYB	CAACAG	1189	6
PdWRKY9	MYB	CAACCA	1535	6
PdWRKY9	Myb-binding site	CAACAG	180	6
PdWRKY9	Myb-binding site	CAACAG	1189	6
PdWRKY10	Myb-binding site	CAACAG	1362	6
PdWRKY10	Myb-binding site	CAACAG	1438	6
PdWRKY10	Unnamed__1	CGTGG	5	5
PdWRKY10	ABRE4	CACGTA	1507	6
PdWRKY10	MYB recognition site	CCGTTG	1534	6
PdWRKY10	MYB recognition site	CCGTTG	1910	6
PdWRKY10	MYB	TAACCA	478	6
PdWRKY10	MYB	CAACAG	1362	6
PdWRKY10	MYB	CAACAG	1438	6
PdWRKY10	Myb	CAACTG	496	6
PdWRKY10	Myb	TAACTG	1301	6
PdWRKY10	Myb	TAACTG	1435	6
PdWRKY10		motif_sequence	66	4	short_function
PdWRKY10		motif_sequence	102	4	short_function
PdWRKY10		motif_sequence	154	4	short_function
PdWRKY10		motif_sequence	526	4	short_function
PdWRKY10		motif_sequence	719	4	short_function
PdWRKY10		motif_sequence	875	4	short_function
PdWRKY10		motif_sequence	1165	4	short_function
PdWRKY10		motif_sequence	1276	4	short_function
PdWRKY10		motif_sequence	1283	4	short_function
PdWRKY10		motif_sequence	1479	4	short_function
PdWRKY10		motif_sequence	1833	4	short_function
PdWRKY10		motif_sequence	1893	4	short_function
PdWRKY10	ABRE	ACGTG	1117	5	cis-acting element involved in the abscisic acid responsiveness
PdWRKY10	ABRE	ACGTG	1507	5	cis-acting element involved in the abscisic acid responsiveness
PdWRKY10	G-Box	CACGTT	1117	6	cis-acting regulatory element involved in light responsiveness
PdWRKY10	TATA-box	TATAAATA	12	8	core promoter element around -30 of transcription start
PdWRKY10	TATA-box	TATAAAT	13	7	core promoter element around -30 of transcription start
PdWRKY10	TATA-box	TATAAA	14	6	core promoter element around -30 of transcription start
PdWRKY10	TATA-box	TATAA	15	5	core promoter element around -30 of transcription start
PdWRKY10	TATA-box	TATATTTATATTT	16	12	core promoter element around -30 of transcription start
PdWRKY10	TATA-box	taTATAAAtc	18	9	core promoter element around -30 of transcription start
PdWRKY10	TATA-box	TATAAAT	19	7	core promoter element around -30 of transcription start
PdWRKY10	TATA-box	TATAAA	20	6	core promoter element around -30 of transcription start
PdWRKY10	TATA-box	TATATAA	21	7	core promoter element around -30 of transcription start
PdWRKY10	TATA-box	TATATA	22	6	core promoter element around -30 of transcription start
PdWRKY10	TATA-box	ATATAT	23	6	core promoter element around -30 of transcription start
PdWRKY10	TATA-box	TATATA	24	6	core promoter element around -30 of transcription start
PdWRKY10	TATA-box	ATATAT	25	6	core promoter element around -30 of transcription start
PdWRKY10	TATA-box	TATATA	26	6	core promoter element around -30 of transcription start
PdWRKY10	TATA-box	TATA	28	4	core promoter element around -30 of transcription start
PdWRKY10	TATA-box	TATA	72	4	core promoter element around -30 of transcription start
PdWRKY10	TATA-box	TATA	623	4	core promoter element around -30 of transcription start
PdWRKY10	TATA-box	ATTATA	631	6	core promoter element around -30 of transcription start
PdWRKY10	TATA-box	TATAA	632	5	core promoter element around -30 of transcription start
PdWRKY10	TATA-box	TATA	633	4	core promoter element around -30 of transcription start
PdWRKY10	TATA-box	TACAAAA	715	7	core promoter element around -30 of transcription start
PdWRKY10	TATA-box	ATATAA	807	6	core promoter element around -30 of transcription start
PdWRKY10	TATA-box	TATA	808	4	core promoter element around -30 of transcription start
PdWRKY10	TATA-box	ATTATA	840	6	core promoter element around -30 of transcription start
PdWRKY10	TATA-box	TATAA	841	5	core promoter element around -30 of transcription start
PdWRKY10	TATA-box	TATA	842	4	core promoter element around -30 of transcription start
PdWRKY10	TATA-box	taTATAAAtc	860	9	core promoter element around -30 of transcription start
PdWRKY10	TATA-box	TATA	934	4	core promoter element around -30 of transcription start
PdWRKY10	TATA-box	ccTATAAAaa	1040	9	core promoter element around -30 of transcription start
PdWRKY10	TATA-box	TATAAAA	1041	7	core promoter element around -30 of transcription start
PdWRKY10	TATA-box	TATAAA	1042	6	core promoter element around -30 of transcription start
PdWRKY10	TATA-box	TATAA	1043	5	core promoter element around -30 of transcription start
PdWRKY10	TATA-box	TATA	1044	4	core promoter element around -30 of transcription start
PdWRKY10	TATA-box	TATA	1107	4	core promoter element around -30 of transcription start
PdWRKY10	TATA-box	ccTATAAAaa	1130	10	core promoter element around -30 of transcription start
PdWRKY10	TATA-box	TATA	1132	4	core promoter element around -30 of transcription start
PdWRKY10	TATA-box	TATACA	1429	6	core promoter element around -30 of transcription start
PdWRKY10	TATA-box	TATATA	1431	6	core promoter element around -30 of transcription start
PdWRKY10	TATA-box	ATATAA	1432	6	core promoter element around -30 of transcription start
PdWRKY10	TATA-box	TATA	1433	4	core promoter element around -30 of transcription start
PdWRKY10	TATA-box	TATAA	1729	5	core promoter element around -30 of transcription start
PdWRKY10	TATA-box	TATA	1730	4	core promoter element around -30 of transcription start
PdWRKY10	TATA-box	TATAAAT	1952	7	core promoter element around -30 of transcription start
PdWRKY10	TATA-box	TATAAA	1953	6	core promoter element around -30 of transcription start
PdWRKY10	TATA-box	TATAA	1954	5	core promoter element around -30 of transcription start
PdWRKY10	TATA-box	TATA	1955	4	core promoter element around -30 of transcription start
PdWRKY10	CARE	CAACTCAC	1484	8
PdWRKY10	CGTCA-motif	CGTCA	670	5	cis-acting regulatory element involved in the MeJA-responsiveness
PdWRKY10	CGTCA-motif	CGTCA	1639	5	cis-acting regulatory element involved in the MeJA-responsiveness
PdWRKY10	ARE	AAACCA	127	6	cis-acting regulatory element essential for the anaerobic induction
PdWRKY10	ARE	AAACCA	180	6	cis-acting regulatory element essential for the anaerobic induction
PdWRKY10	ARE	AAACCA	371	6	cis-acting regulatory element essential for the anaerobic induction
PdWRKY10	ARE	AAACCA	1498	6	cis-acting regulatory element essential for the anaerobic induction
PdWRKY10	ARE	AAACCA	1582	6	cis-acting regulatory element essential for the anaerobic induction
PdWRKY10	MYC	CATTTG	195	6
PdWRKY10	MYC	CATTTG	1228	6
PdWRKY10	MYC	CAATTG	1459	6
PdWRKY10	MYC	CATGTG	1615	6
PdWRKY10	MSA-like	(T/C)C(T/C)AACGG(T/C)(T/C)A	1908	9	cis-acting element involved in cell cycle regulation
PdWRKY10	MYB-like sequence	TAACCA	478	6
PdWRKY10	AT~TATA-box	TATATAAA	20	8
PdWRKY10	AT~TATA-box	TATATA	22	6
PdWRKY10	AT~TATA-box	TATATA	24	6
PdWRKY10	AT~TATA-box	TATATA	26	6
PdWRKY10	AT~TATA-box	TATATA	1431	6
PdWRKY10	WUN-motif	AAATTTCCT	1072	9	wound-responsive element
PdWRKY10	TGA-element	AACGAC	1592	6	auxin-responsive element
PdWRKY10	AAGAA-motif	gGTAAAGAAA	99	9
PdWRKY10	AAGAA-motif	GAAAGAA	1182	7
PdWRKY10	WRE3	CCACCT	1784	6
PdWRKY10	CAAT-box	CAAT	58	4
PdWRKY10	CAAT-box	CAAAT	195	5	common cis-acting element in promoter and enhancer regions
PdWRKY10	CAAT-box	CAAT	304	4
PdWRKY10	CAAT-box	CAAT	326	4
PdWRKY10	CAAT-box	CCAAT	369	5	common cis-acting element in promoter and enhancer regions
PdWRKY10	CAAT-box	CAAT	441	4
PdWRKY10	CAAT-box	CAAT	453	4
PdWRKY10	CAAT-box	CCAAT	476	5	common cis-acting element in promoter and enhancer regions
PdWRKY10	CAAT-box	CCAAT	485	5	common cis-acting element in promoter and enhancer regions
PdWRKY10	CAAT-box	CAAT	486	4
PdWRKY10	CAAT-box	CAAT	573	4
PdWRKY10	CAAT-box	CAAT	612	4
PdWRKY10	CAAT-box	CAAT	627	4
PdWRKY10	CAAT-box	CAAT	725	4
PdWRKY10	CAAT-box	CCAAT	740	5	common cis-acting element in promoter and enhancer regions
PdWRKY10	CAAT-box	CAAT	835	4
PdWRKY10	CAAT-box	CAAT	853	4
PdWRKY10	CAAT-box	CAAT	872	4
PdWRKY10	CAAT-box	CCAAT	973	5	common cis-acting element in promoter and enhancer regions
PdWRKY10	CAAT-box	CCAAT	1023	5	common cis-acting element in promoter and enhancer regions
PdWRKY10	CAAT-box	CAAAT	1071	5	common cis-acting element in promoter and enhancer regions
PdWRKY10	CAAT-box	CAAT	1084	4
PdWRKY10	CAAT-box	CAAT	1113	4
PdWRKY10	CAAT-box	CAAT	1169	4
PdWRKY10	CAAT-box	CCAAT	1178	5	common cis-acting element in promoter and enhancer regions
PdWRKY10	CAAT-box	CAAAT	1229	5	common cis-acting element in promoter and enhancer regions
PdWRKY10	CAAT-box	CAAAT	1236	5	common cis-acting element in promoter and enhancer regions
PdWRKY10	CAAT-box	CCAAT	1241	5	common cis-acting element in promoter and enhancer regions
PdWRKY10	CAAT-box	CAAT	1242	4
PdWRKY10	CAAT-box	CAAT	1332	4
PdWRKY10	CAAT-box	CAAT	1459	4
PdWRKY10	CAAT-box	CAAT	1461	4
PdWRKY10	CAAT-box	CAAAT	1543	5	common cis-acting element in promoter and enhancer regions
PdWRKY10	CAAT-box	CCAAT	1573	5	common cis-acting element in promoter and enhancer regions
PdWRKY10	CAAT-box	CAAT	1589	4
PdWRKY10	CAAT-box	CCAAT	1849	5	common cis-acting element in promoter and enhancer regions
PdWRKY10	CAAT-box	CAAT	1850	4
PdWRKY10	CAAT-box	CAAT	1977	4
PdWRKY10	STRE	AGGGG	1219	5
PdWRKY10	Box 4	ATTAAT	513	6	part of a conserved DNA module involved in light responsiveness
PdWRKY10	Box 4	ATTAAT	1852	6	part of a conserved DNA module involved in light responsiveness
PdWRKY10	P-box	CCTTTTG	1822	7	gibberellin-responsive element
PdWRKY10	P-box	CCTTTTG	1926	7	gibberellin-responsive element
PdWRKY10	TGACG-motif	TGACG	670	5	cis-acting regulatory element involved in the MeJA-responsiveness
PdWRKY10	TGACG-motif	TGACG	1639	5	cis-acting regulatory element involved in the MeJA-responsiveness
PdWRKY10	TCA	TCATCTTCAT	116	9
PdWRKY10	W box	TTGACC	192	6
PdWRKY10	W box	TTGACC	1150	6
PdWRKY10	W box	TTGACC	1827	6
PdWRKY10	W box	TTGACC	1930	6
PdWRKY10	CCAAT-box	CAACGG	1534	6	MYBHv1 binding site
PdWRKY10	CCAAT-box	CAACGG	1910	6	MYBHv1 binding site
PdWRKY10	ACE	GACACGTATG	1505	9	cis-acting element involved in light responsiveness
PdWRKY10	G-box	CACGAC	1407	6	cis-acting regulatory element involved in light responsiveness
PdWRKY10	G-box	CACGAC	1491	6	cis-acting regulatory element involved in light responsiveness
PdWRKY10	G-box	TAACACGTAG	1504	9	cis-acting regulatory element involved in light responsiveness
PdWRKY10	G-box	TACGTG	1507	6	cis-acting regulatory element involved in light responsiveness
PdWRKY10	I-box	AGATAAGG	1934	8	part of a light responsive element
PdWRKY10	ERE	ATTTCATA	554	8
PdWRKY10	ERE	ATTTTAAA	1744	8
PdWRKY10	Unnamed__4	CTCC	467	4
PdWRKY10	Unnamed__4	CTCC	523	4
PdWRKY10	Unnamed__4	CTCC	526	4
PdWRKY10	Unnamed__4	CTCC	606	4
PdWRKY10	Unnamed__4	CTCC	682	4
PdWRKY10	Unnamed__4	CTCC	1089	4
PdWRKY10	Unnamed__4	CTCC	1847	4
PdWRKY10	Unnamed__4	CTCC	1965	4
PdWRKY10	ABRE3a	TACGTG	1507	6
PdWRKY10	as-1	TGACG	670	5
PdWRKY10	as-1	TGACG	1639	5
PdWRKY10	MBS	CAACTG	496	6	MYB binding site involved in drought-inducibility
PdWRKY10	AAAC-motif	CAATCAAAACCT	612	11	light responsive element
PdWRKY11a	MYB-like sequence	TAACCA	1713	6
PdWRKY11a	AT~TATA-box	TATATA	707	6
PdWRKY11a	AT~TATA-box	TATATA	709	6
PdWRKY11a	AT~TATA-box	TATATA	831	6
PdWRKY11a	AT~TATA-box	TATATA	1206	6
PdWRKY11a	MYC	CATGTG	366	6
PdWRKY11a	MYC	CATGTG	368	6
PdWRKY11a	MYC	CAATTG	549	6
PdWRKY11a	MYC	CATTTG	956	6
PdWRKY11a	MYC	CATTTG	1091	6
PdWRKY11a	MYC	CATTTG	1479	6
PdWRKY11a	MYC	CATTTG	1842	6
PdWRKY11a	Myc	TCTCTTA	699	7
PdWRKY11a	ARE	AAACCA	484	6	cis-acting regulatory element essential for the anaerobic induction
PdWRKY11a	ARE	AAACCA	1545	6	cis-acting regulatory element essential for the anaerobic induction
PdWRKY11a	ARE	AAACCA	1770	6	cis-acting regulatory element essential for the anaerobic induction
PdWRKY11a		motif_sequence	34	4	short_function
PdWRKY11a		motif_sequence	291	4	short_function
PdWRKY11a		motif_sequence	382	4	short_function
PdWRKY11a		motif_sequence	972	4	short_function
PdWRKY11a		motif_sequence	1760	4	short_function
PdWRKY11a		motif_sequence	1803	4	short_function
PdWRKY11a		motif_sequence	1808	4	short_function
PdWRKY11a		motif_sequence	1988	4	short_function
PdWRKY11a	G-Box	CACGTT	231	6	cis-acting regulatory element involved in light responsiveness
PdWRKY11a	G-Box	CACGTT	399	6	cis-acting regulatory element involved in light responsiveness
PdWRKY11a	ABRE	GCAACGTGTC	229	9	cis-acting element involved in the abscisic acid responsiveness
PdWRKY11a	ABRE	ACGTG	231	5	cis-acting element involved in the abscisic acid responsiveness
[truncated: 8,895 more rows]
