# Supplementary material for: Characterization of the WRKY gene family reveals its contribution to the adaptability of almond (Prunus dulcis)
Source: PeerJ. 2022 Jul 4;10:e13491. doi: 10.7717/peerj.13491 (PMC9261925; doi:10.7717/peerj.13491)
Supplement: Supplemental Information 11 [file peerj-10-13491-s011.xlsx]

## Sheet: Sheet1
Cis-element analysis of 2000 bp nucleotide sequences data upstream of the translation initiation codon of PdWRKY genes
Serial number	Gene name	Total Cis-element number	Cis-element
			ABRE	ARE	AuxRR-core	CAT-box	CGTCA-motif	circadian	GARE-motif	GC-motif	HD-Zip 1	LTR	MBS	MBSI	NON-box	O2-site	P-box	RY-element	SARE	TCA-element	TC-rich repeats	TGACG-motif	TGA-element
			cis-acting element involved in the abscisic acid responsiveness	cis-acting regulatory element essential for the anaerobic induction	cis-acting regulatory element involved in auxin responsiveness	cis-acting regulatory element related to meristem expression	cis-acting regulatory element involved in the MeJA-responsiveness	cis-acting regulatory element involved in circadian control	gibberellin-responsive element	enhancer-like element involved in anoxic specific inducibility	element involved in differentiation of the palisade mesophyll cells	cis-acting element involved in low-temperature responsiveness	MYB binding site involved in drought-inducibility	MYB binding site involved in flavonoid biosynthetic genes regulation	cis-acting regulatory element related to meristem specific activation	cis-acting regulatory element involved in zein metabolism regulation	gibberellin-responsive element	cis-acting regulatory element involved in seed-specific regulation	cis-acting element involved in salicylic acid responsiveness	cis-acting element involved in salicylic acid responsiveness	cis-acting element involved in defense and stress responsiveness	cis-acting regulatory element involved in the MeJA-responsiveness	auxin-responsive element
1	PdWRKY1	161	2	4			1		1			1	1			1				1		1
2	PdWRKY2	133	10	1		1	2											1			1	2
3	PdWRKY3	220	4	2				1	1			1	3			1		1		1	1
4	PdWRKY4	217	5	4			5					1	2								1	5
5	PdWRKY5	152	3	1									1	1
6	PdWRKY6	222	9	1	1	1	3				1					1				1		3
7	PdWRKY7a	151	5	3		1		1				4		1		1				3	1		1
8	PdWRKY7b	151	5	3		1		1				4		1		1				3	1		1
9	PdWRKY8	143	1	3		1	3						2		1					1		3	3
10	PdWRKY9	120	5	4			2					1				2	1					2	4
11	PdWRKY10	158	2	5			2						1				2					2	1
12	PdWRKY11a	169	4	3								1	1			1	1	1			1
13	PdWRKY11b	169	4	3								1	1			1	1	1			1
14	PdWRKY12	155	1	3	1		1			1		2										1
15	PdWRKY13	239	5	2		1	1					2				1						1
16	PdWRKY14	169	6	5			2					1	1	1			2			1	1	2
17	PdWRKY15	172	3	2			3						1									3
18	PdWRKY16	151	2	2			3					1									3	3	1
19	PdWRKY17	123	1	3			4						1									4
20	PdWRKY18	136		5								1					1			2			1
21	PdWRKY19	151	8	1			3	1								1	2					3
22	PdWRKY20	165	2	2			1					1	2					1				1
23	PdWRKY21	185	3	2	1		2					1					1					2
24	PdWRKY22	153	4	2		3		1						1				1		1			1
25	PdWRKY23	164	4	2			1			2		1				1	1					1
26	PdWRKY24	127	1				1									1				2		1
27	PdWRKY25	228	10	2			4		1	2						2					1	4	1
28	PdWRKY26	168	1	4			2	1				1	3				1					2	2
29	PdWRKY27	171	7	1	2	1	2	1								1						2	2
30	PdWRKY28a	166	1	3			2							1						1		2
31	PdWRKY28b	166	1	3			2							1						1		2
32	PdWRKY29	185	4	2			1		1				3									1
33	PdWRKY30	145	0	4			1	1		1			1					1		1		1
34	PdWRKY31a	150	4	1		2	5	1		1			1				3		1			5
35	PdWRKY31b	150	4	1		2	5	1		1			1				3		1			5
36	PdWRKY32	177	4	2			3	1		1							2					4
37	PdWRKY33	225	10	3	1	1	1			1						1					1	1
38	PdWRKY34	141	1	1												2				1
39	PdWRKY35	193	3	4			1						1				1	2			1	1
40	PdWRKY36	133				2	1															1	1
41	PdWRKY37	132		4		2		1					2			1		1			2
42	PdWRKY38a	166	2	4		1						2	1				2			1			1
43	PdWRKY38b	162	2	5								2	1				1			1			1
44	PdWRKY39	180	1	2			5					1	1			1	1	1				5	1
45	PdWRKY40	116	4			1	2					1	1	1			3					2
46	PdWRKY41	188	3		1		4	1				3	2			2	1	1				4
47	PdWRKY42	141	1	2					1								1			2	1
48	PdWRKY43	159		4	1	1											2				1
49	PdWRKY44	179	5	3		1	2						1								1	2	1
50	PdWRKY45	183	7	5		2	1									2	1			1		1	1
51	PdWRKY46	154	3			1	1			1			1			1						1
52	PdWRKY47	156	10	3			2	1	1							1		1		1		2	1
53	PdWRKY48a	166	1	3		1							2			1				1	1
54	PdWRKY48b	166	1	3		1							2			1				1	1
55	PdWRKY49	191	2	1		1	5														1	5	1
56	PdWRKY50	161	6		2	1	3						1					1				3
57	PdWRKY51	162	4	4	1		2						1				1					2
58	PdWRKY52	148	2	3		1	1		1		1		1							1	1	1
59	PdWRKY53	145	9	5							1					1				1
60	PdWRKY54	133	3				3					2				2					1	3
61	PdWRKY55	137	1	1			1					1										1	1
62	PdWRKY56	132	2	5			1					1					2					1	1
Mean number of different types of cis-element copies in the PdWRKY members		163	3.75862	2.83636	1.22222	1.29167	2.28889	1	1	1.22222	1	1.52	1.41935	1	1	1.23077	1.54167	1.07692	1	1.30435	1.14286	2.31111	1.33333

## Sheet: Sheet2
Cis-element		Total	Box I	G-Box	G-box	GT1-motif	Sp1	rbcS-CMA7a
			light responsive element	cis-acting regulatory element involved in light responsiveness	cis-acting regulatory element involved in light responsiveness	light responsive element	light responsive element	part of a light responsive element
TaARF1	TraesCS1A01G156600.1
TaARF2	TraesCS1A01G334900.1			4	7	1	3
TaARF3	TraesCS1A01G396400.1				1		3
TaARF4	TraesCS2A01G309300.1			1	2		8
TaARF5	TraesCS2A01G491000.1					1	3
TaARF6	TraesCS2A01G547800.1				1		3
TaARF7	TraesCS2A01G567300.1						4
TaARF8	TraesCS3A01G159200.1			3	5
TaARF9	TraesCS3A01G246000.1				4		3
TaARF10	TraesCS3A01G292400.1				5	1	6
TaARF11	TraesCS3A01G442000.1			1	1	1	4
TaARF12	TraesCS3A01G449300.1				1	1	2
TaARF13	TraesCS5A01G038300.1						8
TaARF14	TraesCS6A01G113000.1				3
TaARF15	TraesCS6A01G138600.1			2	2	1	1
TaARF16	TraesCS6A01G222300.1				2
TaARF17	TraesCS7A01G160800.1			1	3	1	2
TaARF18	TraesCS7A01G252000.1			3	2		2
TaARF19	TraesCS7A01G416400.1				1		4
TaARF20	TraesCS7A01G446900.1			1		1	5
TaARF21	TraesCS7A01G461700.1					1	3
TaARF22	TraesCS1B01G173700.1				3		2
TaARF23	TraesCS1B01G347900.1			2	6		1
TaARF24	TraesCS1B01G424700.1
TaARF25	TraesCS2B01G326400.1			2	2		7
TaARF26	TraesCS2B01G397300.1			1	1		3
TaARF27	TraesCS2B01G519200.1						3
TaARF28	TraesCS2B01G578500.1				5		7
TaARF29	TraesCS3B01G190100.1			3	1
TaARF30	TraesCS3B01G327000.1				3	1	6
TaARF31	TraesCS3B01G475800.1			1	4	1	5
TaARF32	TraesCS3B01G486000.1			1	2		2
TaARF33	TraesCS5B01G039800.1				1		4
TaARF34	TraesCS6B01G141300.1			1	2
TaARF35	TraesCS6B01G167100.1			2	3	1	2
TaARF36	TraesCS6B01G258800.1			1	2
TaARF37	TraesCS7B01G065800.1				5	1	5
TaARF38	TraesCS7B01G138900.1					1	2
TaARF39	TraesCS7B01G316600.1				2		3
TaARF40	TraesCS7B01G346700.1				1		4
TaARF41	TraesCS7B01G363100.1					1	2
TaARF42	TraesCS1D01G155100.1			1	1
TaARF43	TraesCS1D01G337400.1			1	7	1	5
TaARF44	TraesCS1D01G404400.1			1			1
TaARF45	TraesCS2D01G307600.1			2	1	2	8
TaARF46	TraesCS2D01G376600.1				1		2
TaARF47	TraesCS2D01G491200.1				1		2
TaARF48	TraesCS2D01G548900.1				9		5
TaARF49	TraesCS2D01G577800.1					1	4
TaARF50	TraesCS3D01G166700.1			3	4
TaARF51	TraesCS3D01G245400.1				3		3
TaARF52	TraesCS3D01G292100.1				3		4
TaARF53	TraesCS3D01G434700.1				2	1	4
TaARF54	TraesCS3D01G442000.1				1		1
TaARF55	TraesCS5D01G045700.1						6
TaARF56	TraesCS6D01G102300.1				3		1
TaARF57	TraesCS6D01G127600.1			2	2	1	1
TaARF58	TraesCS6D01G212700.1				5		1
TaARF59	TraesCS7D01G161900.1			1	3	2	6
TaARF60	TraesCS7D01G250100.1				2		1
TaARF61	TraesCS7D01G409700.1			1	3		1
TaARF62	TraesCS7D01G436800.1					1	7
TaARF63	TraesCS7D01G449900.1			1	1	1
			0	4.3	13.5	2.5	18.5	0
