# Supplementary material for: Characterization of the WRKY gene family reveals its contribution to the adaptability of almond (Prunus dulcis)
Source: PeerJ. 2022 Jul 4;10:e13491. doi: 10.7717/peerj.13491 (PMC9261925; doi:10.7717/peerj.13491)
Supplement: Supplemental Information 12 [file peerj-10-13491-s012.xlsx]

## Sheet: Sheet1
Expression profiles of PdWRKY genes in multiple tissues
Gene name	Leaves	Bud	Flower	Pistils
PdWRKY1	2.68647	7.5222	21.9677	10.7949
PdWRKY2	5.17227	12.3781	3.13902	12.2638
PdWRKY3	0	1.31702	3.85485	0.19358
PdWRKY4	0	0	0	0
PdWRKY5	2.22168	2.08493	7.52635	4.21571
PdWRKY6	1.11961	1.7511	2.04094	1.6972
PdWRKY7a	13.9473	18.976	0	8.39114
PdWRKY7b	8.66994	0.000120265	0	3.78688
PdWRKY8	0	0	0	0
PdWRKY9	3.73404	0	0	1.78884
PdWRKY10	5.29662	1.41873	0.000713215	3.97741
PdWRKY11a	16.4378	7.56387	0.000981123	4.91551
PdWRKY11b	13.0535	28.0882	7.7922	14.5013
PdWRKY12	0.912849	0	0	0
PdWRKY13	0	0	0	0.00911277
PdWRKY14	3.14064	1.9582	1.90461	1.89813
PdWRKY15	0	0	0	0.0657225
PdWRKY16	4.53841	1.97697	2.44664	2.82842
PdWRKY17	0	0	0	0
PdWRKY18	0	0	0	0.101367
PdWRKY19	15.2092	0.789047	0	1.66803
PdWRKY20	0	0	0	0.125796
PdWRKY21	0	0	0	0.393651
PdWRKY22	3.47934	14.6613	3.16728	7.09485
PdWRKY23	12.2807	45.449	0	1.05325
PdWRKY24	0	0	0	1.01592
PdWRKY25	0	0	1.13283	3.10523
PdWRKY26	4.1491	7.59762	4.87304	15.5145
PdWRKY27	1.17475	9.55239	0	0.968216
PdWRKY28a	6.88863	10.7643	0.000685449	14.7841
PdWRKY28b	4.89412e-06	6.33638e-05	1.51944	0.602117
PdWRKY29	0	0	0	0.0341132
PdWRKY30	0	8.99596	0	0.402531
PdWRKY31a	12.9256	6.04381	0.00249761	2.54892
PdWRKY31b	0.0023975	0.00842379	3.35982	5.66622
PdWRKY32	1.0848	17.2287	0	19.6502
PdWRKY33	0	5.12261	1.92697	1.27156
PdWRKY34	0	5.67138	1.7923	2.16916
PdWRKY35	0	15.3915	0	0.271161
PdWRKY36	7.11214	8.32357	13.5493	26.7175
PdWRKY37	0	6.82837	0	0.0141261
PdWRKY38a	0	0	0	0.112222
PdWRKY38b	0	0	0	2.24782e-05
PdWRKY39	1.20206e-05	1.24349	1.19938	3.70402
PdWRKY40	7.16494	0	2.16086	4.3438
PdWRKY41	0	25.0341	0	0
PdWRKY42	2.27859e-94	14.9738	1.57511	2.44606
PdWRKY43	11.152	41.3988	7.17217	29.0471
PdWRKY44	11.862	0	1.53746	0.0981383
PdWRKY45	11.9613	16.2496	7.0853	24.2195
PdWRKY46	5.61436	0.255082	25.6086	22.9398
PdWRKY47	0	18.1364	0	0.888138
PdWRKY48a	0.794794	0.319548	0.723667	0.040377
PdWRKY48b	0.788982	4.17076	0.718517	2.22675
PdWRKY49	0	0	0	0
PdWRKY50	0	0	0	0
PdWRKY51	9.58415	0	1.24386	0.872531
PdWRKY52	0	0	0.764291	2.62779
PdWRKY53	1.43297	153.852	6.09708	4.66138
PdWRKY54	7.1741	8.48591	8.31907	21.2889
PdWRKY55	7.38305	35.2788	14.7938	32.3645
PdWRKY56	1.04851	36.4183	4.7689	7.74323
