# Supplementary material for: Characterization of the WRKY gene family reveals its contribution to the adaptability of almond (Prunus dulcis)
Source: PeerJ. 2022 Jul 4;10:e13491. doi: 10.7717/peerj.13491 (PMC9261925; doi:10.7717/peerj.13491)
Supplement: Supplemental Information 13 [file peerj-10-13491-s013.xlsx]

## Sheet: Sheet1
class	ID	Descrption	number	qvalue		Query	Match
Molecular Function	GO:0001071	nucleic acid binding transcription factor activity	32	1		Prudul26A001568T1	GO:0006355
Molecular Function	GO:0003674	molecular_function	32	1		Prudul26A001568T1	GO:0003700
Molecular Function	GO:0003676	nucleic acid binding	32	1		Prudul26A001568T1	GO:0043565
Molecular Function	GO:0003677	DNA binding	32	1		Prudul26A001657T1	GO:0006355
Molecular Function	GO:0003700	transcription factor activity, sequence-specific DNA binding	32	1		Prudul26A001657T1	GO:0003700
Molecular Function	GO:0005488	binding	32	1		Prudul26A001657T1	GO:0043565
Biological Process	GO:0006139	nucleobase-containing compound metabolic process	32	1		Prudul26A001748T1	GO:0006355
Biological Process	GO:0006351	transcription, DNA-templated	32	1		Prudul26A001748T1	GO:0003700
Biological Process	GO:0006355	regulation of transcription, DNA-templated	32	1		Prudul26A001748T1	GO:0043565
Biological Process	GO:0006725	cellular aromatic compound metabolic process	32	1		Prudul26A001975T1	GO:0006355
Biological Process	GO:0006807	nitrogen compound metabolic process	32	1		Prudul26A001975T1	GO:0003700
Biological Process	GO:0008150	biological_process	32	1		Prudul26A001975T1	GO:0043565
Biological Process	GO:0008152	metabolic process	32	1		Prudul26A002073T1	GO:0006355
Biological Process	GO:0009058	biosynthetic process	32	1		Prudul26A002073T1	GO:0003700
Biological Process	GO:0009059	macromolecule biosynthetic process	32	1		Prudul26A002073T1	GO:0043565
Biological Process	GO:0009889	regulation of biosynthetic process	32	1		Prudul26A004090T1	GO:0006355
Biological Process	GO:0009987	cellular process	32	1		Prudul26A004090T1	GO:0003700
Biological Process	GO:0010467	gene expression	32	1		Prudul26A004090T1	GO:0043565
Biological Process	GO:0010468	regulation of gene expression	32	1		Prudul26A004090T2	GO:0006355
Biological Process	GO:0010556	regulation of macromolecule biosynthetic process	32	1		Prudul26A004090T2	GO:0003700
Biological Process	GO:0016070	RNA metabolic process	32	1		Prudul26A004090T2	GO:0043565
Biological Process	GO:0018130	heterocycle biosynthetic process	32	1		Prudul26A005095T1	GO:0006355
Biological Process	GO:0019219	regulation of nucleobase-containing compound metabolic process	32	1		Prudul26A005095T1	GO:0003700
Biological Process	GO:0019222	regulation of metabolic process	32	1		Prudul26A005095T1	GO:0043565
Biological Process	GO:0019438	aromatic compound biosynthetic process	32	1		Prudul26A005633T1	GO:0006355
Biological Process	GO:0031323	regulation of cellular metabolic process	32	1		Prudul26A005633T1	GO:0003700
Biological Process	GO:0031326	regulation of cellular biosynthetic process	32	1		Prudul26A005633T1	GO:0043565
Biological Process	GO:0032774	RNA biosynthetic process	32	1		Prudul26A005633T2	GO:0006355
Biological Process	GO:0034641	cellular nitrogen compound metabolic process	32	1		Prudul26A005633T2	GO:0003700
Biological Process	GO:0034645	cellular macromolecule biosynthetic process	32	1		Prudul26A005633T2	GO:0043565
Biological Process	GO:0034654	nucleobase-containing compound biosynthetic process	32	1		Prudul26A005971T1	GO:0006355
Biological Process	GO:0043170	macromolecule metabolic process	32	1		Prudul26A005971T1	GO:0003700
Molecular Function	GO:0043565	sequence-specific DNA binding	32	1		Prudul26A005971T1	GO:0043565
Biological Process	GO:0044237	cellular metabolic process	32	1		Prudul26A006177T1	GO:0006355
Biological Process	GO:0044238	primary metabolic process	32	1		Prudul26A006177T1	GO:0003700
Biological Process	GO:0044249	cellular biosynthetic process	32	1		Prudul26A006177T1	GO:0043565
Biological Process	GO:0044260	cellular macromolecule metabolic process	32	1		Prudul26A006215T1	GO:0006355
Biological Process	GO:0044271	cellular nitrogen compound biosynthetic process	32	1		Prudul26A006215T1	GO:0003700
Biological Process	GO:0046483	heterocycle metabolic process	32	1		Prudul26A006215T1	GO:0043565
Biological Process	GO:0050789	regulation of biological process	32	1		Prudul26A007596T1	GO:0006355
Biological Process	GO:0050794	regulation of cellular process	32	1		Prudul26A007596T1	GO:0003700
Biological Process	GO:0051171	regulation of nitrogen compound metabolic process	32	1		Prudul26A007596T1	GO:0043565
Biological Process	GO:0051252	regulation of RNA metabolic process	32	1		Prudul26A007647T1	GO:0006355
Biological Process	GO:0060255	regulation of macromolecule metabolic process	32	1		Prudul26A007647T1	GO:0003700
Biological Process	GO:0065007	biological regulation	32	1		Prudul26A007647T1	GO:0043565
Biological Process	GO:0071704	organic substance metabolic process	32	1		Prudul26A008567T1	GO:0006355
Biological Process	GO:0080090	regulation of primary metabolic process	32	1		Prudul26A008567T1	GO:0003700
Biological Process	GO:0090304	nucleic acid metabolic process	32	1		Prudul26A008567T1	GO:0043565
Molecular Function	GO:0097159	organic cyclic compound binding	32	1		Prudul26A009578T1	GO:0006355
Biological Process	GO:0097659	nucleic acid-templated transcription	32	1		Prudul26A009578T1	GO:0003700
Biological Process	GO:1901360	organic cyclic compound metabolic process	32	1		Prudul26A009578T1	GO:0043565
Biological Process	GO:1901362	organic cyclic compound biosynthetic process	32	1		Prudul26A011586T1	GO:0006355
Molecular Function	GO:1901363	heterocyclic compound binding	32	1		Prudul26A011586T1	GO:0003700
Biological Process	GO:1901576	organic substance biosynthetic process	32	1		Prudul26A011586T1	GO:0043565
Biological Process	GO:1903506	regulation of nucleic acid-templated transcription	32	1		Prudul26A012059T1	GO:0006355
Biological Process	GO:2000112	regulation of cellular macromolecule biosynthetic process	32	1		Prudul26A012059T1	GO:0003700
Biological Process	GO:2001141	regulation of RNA biosynthetic process	32	1		Prudul26A012059T1	GO:0043565
						Prudul26A012168T1	GO:0006355
						Prudul26A012168T1	GO:0003700
						Prudul26A012168T1	GO:0043565
						Prudul26A012395T1	GO:0006355
						Prudul26A012395T1	GO:0003700
						Prudul26A012395T1	GO:0043565
						Prudul26A013051T1	GO:0006355
						Prudul26A013051T1	GO:0003700
						Prudul26A013051T1	GO:0043565
						Prudul26A013051T2	GO:0006355
						Prudul26A013051T2	GO:0003700
						Prudul26A013051T2	GO:0043565
						Prudul26A013566T1	GO:0006355
						Prudul26A013566T1	GO:0003700
						Prudul26A013566T1	GO:0043565
						Prudul26A014175T1	GO:0006355
						Prudul26A014175T1	GO:0003700
						Prudul26A014175T1	GO:0043565
						Prudul26A015240T1	GO:0006355
						Prudul26A015240T1	GO:0003700
						Prudul26A015240T1	GO:0043565
						Prudul26A015786T1	GO:0006355
						Prudul26A015786T1	GO:0003700
						Prudul26A015786T1	GO:0043565
						Prudul26A017436T1	GO:0006355
						Prudul26A017436T1	GO:0003700
						Prudul26A017436T1	GO:0043565
						Prudul26A017718T1	GO:0006355
						Prudul26A017718T1	GO:0003700
						Prudul26A017718T1	GO:0043565
						Prudul26A017718T2	GO:0006355
						Prudul26A017718T2	GO:0003700
						Prudul26A017718T2	GO:0043565
						Prudul26A018032T1	GO:0006355
						Prudul26A018032T1	GO:0003700
						Prudul26A018032T1	GO:0043565
						Prudul26A019298T1	GO:0006355
						Prudul26A019298T1	GO:0003700
						Prudul26A019298T1	GO:0043565

## Sheet: Sheet2
Functional annotation of GO enrichment of WRKY proteins in almond
Protein ID	GO id		GO id	Description	All (32)	Genes
Prudul26A001568P1	GO:0006355		GO:0001071	nucleic acid binding transcription factor activity	32	Prudul26A001568P1;Prudul26A001657P1;Prudul26A001748P1;Prudul26A001975P1;Prudul26A002073P1;Prudul26A004090P1;Prudul26A004090P2;Prudul26A005095P1;Prudul26A005633P1;Prudul26A005633P2;Prudul26A005971P1;Prudul26A006177P1;Prudul26A006215P1;Prudul26A007596P1;Prudul26A007647P1;Prudul26A008567P1;Prudul26A009578P1;Prudul26A011586P1;Prudul26A012059P1;Prudul26A012168P1;Prudul26A012395P1;Prudul26A013051P1;Pru…
Prudul26A001568P1	GO:0003700		GO:0003674	molecular_function	32	Prudul26A001568P1;Prudul26A001657P1;Prudul26A001748P1;Prudul26A001975P1;Prudul26A002073P1;Prudul26A004090P1;Prudul26A004090P2;Prudul26A005095P1;Prudul26A005633P1;Prudul26A005633P2;Prudul26A005971P1;Prudul26A006177P1;Prudul26A006215P1;Prudul26A007596P1;Prudul26A007647P1;Prudul26A008567P1;Prudul26A009578P1;Prudul26A011586P1;Prudul26A012059P1;Prudul26A012168P1;Prudul26A012395P1;Prudul26A013051P1;Pru…
Prudul26A001568P1	GO:0043565		GO:0003676	nucleic acid binding	32	Prudul26A001568P1;Prudul26A001657P1;Prudul26A001748P1;Prudul26A001975P1;Prudul26A002073P1;Prudul26A004090P1;Prudul26A004090P2;Prudul26A005095P1;Prudul26A005633P1;Prudul26A005633P2;Prudul26A005971P1;Prudul26A006177P1;Prudul26A006215P1;Prudul26A007596P1;Prudul26A007647P1;Prudul26A008567P1;Prudul26A009578P1;Prudul26A011586P1;Prudul26A012059P1;Prudul26A012168P1;Prudul26A012395P1;Prudul26A013051P1;Pru…
Prudul26A001657P1	GO:0006355		GO:0003677	DNA binding	32	Prudul26A001568P1;Prudul26A001657P1;Prudul26A001748P1;Prudul26A001975P1;Prudul26A002073P1;Prudul26A004090P1;Prudul26A004090P2;Prudul26A005095P1;Prudul26A005633P1;Prudul26A005633P2;Prudul26A005971P1;Prudul26A006177P1;Prudul26A006215P1;Prudul26A007596P1;Prudul26A007647P1;Prudul26A008567P1;Prudul26A009578P1;Prudul26A011586P1;Prudul26A012059P1;Prudul26A012168P1;Prudul26A012395P1;Prudul26A013051P1;Pru…
Prudul26A001657P1	GO:0003700		GO:0003700	transcription factor activity, sequence-specific DNA binding	32	Prudul26A001568P1;Prudul26A001657P1;Prudul26A001748P1;Prudul26A001975P1;Prudul26A002073P1;Prudul26A004090P1;Prudul26A004090P2;Prudul26A005095P1;Prudul26A005633P1;Prudul26A005633P2;Prudul26A005971P1;Prudul26A006177P1;Prudul26A006215P1;Prudul26A007596P1;Prudul26A007647P1;Prudul26A008567P1;Prudul26A009578P1;Prudul26A011586P1;Prudul26A012059P1;Prudul26A012168P1;Prudul26A012395P1;Prudul26A013051P1;Pru…
Prudul26A001657P1	GO:0043565		GO:0005488	binding	32	Prudul26A001568P1;Prudul26A001657P1;Prudul26A001748P1;Prudul26A001975P1;Prudul26A002073P1;Prudul26A004090P1;Prudul26A004090P2;Prudul26A005095P1;Prudul26A005633P1;Prudul26A005633P2;Prudul26A005971P1;Prudul26A006177P1;Prudul26A006215P1;Prudul26A007596P1;Prudul26A007647P1;Prudul26A008567P1;Prudul26A009578P1;Prudul26A011586P1;Prudul26A012059P1;Prudul26A012168P1;Prudul26A012395P1;Prudul26A013051P1;Pru…
Prudul26A001748P1	GO:0006355		GO:0043565	sequence-specific DNA binding	32	Prudul26A001568P1;Prudul26A001657P1;Prudul26A001748P1;Prudul26A001975P1;Prudul26A002073P1;Prudul26A004090P1;Prudul26A004090P2;Prudul26A005095P1;Prudul26A005633P1;Prudul26A005633P2;Prudul26A005971P1;Prudul26A006177P1;Prudul26A006215P1;Prudul26A007596P1;Prudul26A007647P1;Prudul26A008567P1;Prudul26A009578P1;Prudul26A011586P1;Prudul26A012059P1;Prudul26A012168P1;Prudul26A012395P1;Prudul26A013051P1;Pru…
Prudul26A001748P1	GO:0003700		GO:0097159	organic cyclic compound binding	32	Prudul26A001568P1;Prudul26A001657P1;Prudul26A001748P1;Prudul26A001975P1;Prudul26A002073P1;Prudul26A004090P1;Prudul26A004090P2;Prudul26A005095P1;Prudul26A005633P1;Prudul26A005633P2;Prudul26A005971P1;Prudul26A006177P1;Prudul26A006215P1;Prudul26A007596P1;Prudul26A007647P1;Prudul26A008567P1;Prudul26A009578P1;Prudul26A011586P1;Prudul26A012059P1;Prudul26A012168P1;Prudul26A012395P1;Prudul26A013051P1;Pru…
Prudul26A001748P1	GO:0043565		GO:1901363	heterocyclic compound binding	32	Prudul26A001568P1;Prudul26A001657P1;Prudul26A001748P1;Prudul26A001975P1;Prudul26A002073P1;Prudul26A004090P1;Prudul26A004090P2;Prudul26A005095P1;Prudul26A005633P1;Prudul26A005633P2;Prudul26A005971P1;Prudul26A006177P1;Prudul26A006215P1;Prudul26A007596P1;Prudul26A007647P1;Prudul26A008567P1;Prudul26A009578P1;Prudul26A011586P1;Prudul26A012059P1;Prudul26A012168P1;Prudul26A012395P1;Prudul26A013051P1;Pru…
Prudul26A001975P1	GO:0006355		GO:0006139	nucleobase-containing compound metabolic process	32	Prudul26A001568P1;Prudul26A001657P1;Prudul26A001748P1;Prudul26A001975P1;Prudul26A002073P1;Prudul26A004090P1;Prudul26A004090P2;Prudul26A005095P1;Prudul26A005633P1;Prudul26A005633P2;Prudul26A005971P1;Prudul26A006177P1;Prudul26A006215P1;Prudul26A007596P1;Prudul26A007647P1;Prudul26A008567P1;Prudul26A009578P1;Prudul26A011586P1;Prudul26A012059P1;Prudul26A012168P1;Prudul26A012395P1;Prudul26A013051P1;Pru…
Prudul26A001975P1	GO:0003700		GO:0006351	transcription, DNA-templated	32	Prudul26A001568P1;Prudul26A001657P1;Prudul26A001748P1;Prudul26A001975P1;Prudul26A002073P1;Prudul26A004090P1;Prudul26A004090P2;Prudul26A005095P1;Prudul26A005633P1;Prudul26A005633P2;Prudul26A005971P1;Prudul26A006177P1;Prudul26A006215P1;Prudul26A007596P1;Prudul26A007647P1;Prudul26A008567P1;Prudul26A009578P1;Prudul26A011586P1;Prudul26A012059P1;Prudul26A012168P1;Prudul26A012395P1;Prudul26A013051P1;Pru…
Prudul26A001975P1	GO:0043565		GO:0006355	regulation of transcription, DNA-templated	32	Prudul26A001568P1;Prudul26A001657P1;Prudul26A001748P1;Prudul26A001975P1;Prudul26A002073P1;Prudul26A004090P1;Prudul26A004090P2;Prudul26A005095P1;Prudul26A005633P1;Prudul26A005633P2;Prudul26A005971P1;Prudul26A006177P1;Prudul26A006215P1;Prudul26A007596P1;Prudul26A007647P1;Prudul26A008567P1;Prudul26A009578P1;Prudul26A011586P1;Prudul26A012059P1;Prudul26A012168P1;Prudul26A012395P1;Prudul26A013051P1;Pru…
Prudul26A002073P1	GO:0006355		GO:0006725	cellular aromatic compound metabolic process	32	Prudul26A001568P1;Prudul26A001657P1;Prudul26A001748P1;Prudul26A001975P1;Prudul26A002073P1;Prudul26A004090P1;Prudul26A004090P2;Prudul26A005095P1;Prudul26A005633P1;Prudul26A005633P2;Prudul26A005971P1;Prudul26A006177P1;Prudul26A006215P1;Prudul26A007596P1;Prudul26A007647P1;Prudul26A008567P1;Prudul26A009578P1;Prudul26A011586P1;Prudul26A012059P1;Prudul26A012168P1;Prudul26A012395P1;Prudul26A013051P1;Pru…
Prudul26A002073P1	GO:0003700		GO:0006807	nitrogen compound metabolic process	32	Prudul26A001568P1;Prudul26A001657P1;Prudul26A001748P1;Prudul26A001975P1;Prudul26A002073P1;Prudul26A004090P1;Prudul26A004090P2;Prudul26A005095P1;Prudul26A005633P1;Prudul26A005633P2;Prudul26A005971P1;Prudul26A006177P1;Prudul26A006215P1;Prudul26A007596P1;Prudul26A007647P1;Prudul26A008567P1;Prudul26A009578P1;Prudul26A011586P1;Prudul26A012059P1;Prudul26A012168P1;Prudul26A012395P1;Prudul26A013051P1;Pru…
Prudul26A002073P1	GO:0043565		GO:0008150	biological_process	32	Prudul26A001568P1;Prudul26A001657P1;Prudul26A001748P1;Prudul26A001975P1;Prudul26A002073P1;Prudul26A004090P1;Prudul26A004090P2;Prudul26A005095P1;Prudul26A005633P1;Prudul26A005633P2;Prudul26A005971P1;Prudul26A006177P1;Prudul26A006215P1;Prudul26A007596P1;Prudul26A007647P1;Prudul26A008567P1;Prudul26A009578P1;Prudul26A011586P1;Prudul26A012059P1;Prudul26A012168P1;Prudul26A012395P1;Prudul26A013051P1;Pru…
Prudul26A004090P1	GO:0006355		GO:0008152	metabolic process	32	Prudul26A001568P1;Prudul26A001657P1;Prudul26A001748P1;Prudul26A001975P1;Prudul26A002073P1;Prudul26A004090P1;Prudul26A004090P2;Prudul26A005095P1;Prudul26A005633P1;Prudul26A005633P2;Prudul26A005971P1;Prudul26A006177P1;Prudul26A006215P1;Prudul26A007596P1;Prudul26A007647P1;Prudul26A008567P1;Prudul26A009578P1;Prudul26A011586P1;Prudul26A012059P1;Prudul26A012168P1;Prudul26A012395P1;Prudul26A013051P1;Pru…
Prudul26A004090P1	GO:0003700		GO:0009058	biosynthetic process	32	Prudul26A001568P1;Prudul26A001657P1;Prudul26A001748P1;Prudul26A001975P1;Prudul26A002073P1;Prudul26A004090P1;Prudul26A004090P2;Prudul26A005095P1;Prudul26A005633P1;Prudul26A005633P2;Prudul26A005971P1;Prudul26A006177P1;Prudul26A006215P1;Prudul26A007596P1;Prudul26A007647P1;Prudul26A008567P1;Prudul26A009578P1;Prudul26A011586P1;Prudul26A012059P1;Prudul26A012168P1;Prudul26A012395P1;Prudul26A013051P1;Pru…
Prudul26A004090P1	GO:0043565		GO:0009059	macromolecule biosynthetic process	32	Prudul26A001568P1;Prudul26A001657P1;Prudul26A001748P1;Prudul26A001975P1;Prudul26A002073P1;Prudul26A004090P1;Prudul26A004090P2;Prudul26A005095P1;Prudul26A005633P1;Prudul26A005633P2;Prudul26A005971P1;Prudul26A006177P1;Prudul26A006215P1;Prudul26A007596P1;Prudul26A007647P1;Prudul26A008567P1;Prudul26A009578P1;Prudul26A011586P1;Prudul26A012059P1;Prudul26A012168P1;Prudul26A012395P1;Prudul26A013051P1;Pru…
Prudul26A004090P2	GO:0006355		GO:0009889	regulation of biosynthetic process	32	Prudul26A001568P1;Prudul26A001657P1;Prudul26A001748P1;Prudul26A001975P1;Prudul26A002073P1;Prudul26A004090P1;Prudul26A004090P2;Prudul26A005095P1;Prudul26A005633P1;Prudul26A005633P2;Prudul26A005971P1;Prudul26A006177P1;Prudul26A006215P1;Prudul26A007596P1;Prudul26A007647P1;Prudul26A008567P1;Prudul26A009578P1;Prudul26A011586P1;Prudul26A012059P1;Prudul26A012168P1;Prudul26A012395P1;Prudul26A013051P1;Pru…
Prudul26A004090P2	GO:0003700		GO:0009987	cellular process	32	Prudul26A001568P1;Prudul26A001657P1;Prudul26A001748P1;Prudul26A001975P1;Prudul26A002073P1;Prudul26A004090P1;Prudul26A004090P2;Prudul26A005095P1;Prudul26A005633P1;Prudul26A005633P2;Prudul26A005971P1;Prudul26A006177P1;Prudul26A006215P1;Prudul26A007596P1;Prudul26A007647P1;Prudul26A008567P1;Prudul26A009578P1;Prudul26A011586P1;Prudul26A012059P1;Prudul26A012168P1;Prudul26A012395P1;Prudul26A013051P1;Pru…
Prudul26A004090P2	GO:0043565		GO:0010467	gene expression	32	Prudul26A001568P1;Prudul26A001657P1;Prudul26A001748P1;Prudul26A001975P1;Prudul26A002073P1;Prudul26A004090P1;Prudul26A004090P2;Prudul26A005095P1;Prudul26A005633P1;Prudul26A005633P2;Prudul26A005971P1;Prudul26A006177P1;Prudul26A006215P1;Prudul26A007596P1;Prudul26A007647P1;Prudul26A008567P1;Prudul26A009578P1;Prudul26A011586P1;Prudul26A012059P1;Prudul26A012168P1;Prudul26A012395P1;Prudul26A013051P1;Pru…
Prudul26A005095P1	GO:0006355		GO:0010468	regulation of gene expression	32	Prudul26A001568P1;Prudul26A001657P1;Prudul26A001748P1;Prudul26A001975P1;Prudul26A002073P1;Prudul26A004090P1;Prudul26A004090P2;Prudul26A005095P1;Prudul26A005633P1;Prudul26A005633P2;Prudul26A005971P1;Prudul26A006177P1;Prudul26A006215P1;Prudul26A007596P1;Prudul26A007647P1;Prudul26A008567P1;Prudul26A009578P1;Prudul26A011586P1;Prudul26A012059P1;Prudul26A012168P1;Prudul26A012395P1;Prudul26A013051P1;Pru…
Prudul26A005095P1	GO:0003700		GO:0010556	regulation of macromolecule biosynthetic process	32	Prudul26A001568P1;Prudul26A001657P1;Prudul26A001748P1;Prudul26A001975P1;Prudul26A002073P1;Prudul26A004090P1;Prudul26A004090P2;Prudul26A005095P1;Prudul26A005633P1;Prudul26A005633P2;Prudul26A005971P1;Prudul26A006177P1;Prudul26A006215P1;Prudul26A007596P1;Prudul26A007647P1;Prudul26A008567P1;Prudul26A009578P1;Prudul26A011586P1;Prudul26A012059P1;Prudul26A012168P1;Prudul26A012395P1;Prudul26A013051P1;Pru…
Prudul26A005095P1	GO:0043565		GO:0016070	RNA metabolic process	32	Prudul26A001568P1;Prudul26A001657P1;Prudul26A001748P1;Prudul26A001975P1;Prudul26A002073P1;Prudul26A004090P1;Prudul26A004090P2;Prudul26A005095P1;Prudul26A005633P1;Prudul26A005633P2;Prudul26A005971P1;Prudul26A006177P1;Prudul26A006215P1;Prudul26A007596P1;Prudul26A007647P1;Prudul26A008567P1;Prudul26A009578P1;Prudul26A011586P1;Prudul26A012059P1;Prudul26A012168P1;Prudul26A012395P1;Prudul26A013051P1;Pru…
Prudul26A005633P1	GO:0006355		GO:0018130	heterocycle biosynthetic process	32	Prudul26A001568P1;Prudul26A001657P1;Prudul26A001748P1;Prudul26A001975P1;Prudul26A002073P1;Prudul26A004090P1;Prudul26A004090P2;Prudul26A005095P1;Prudul26A005633P1;Prudul26A005633P2;Prudul26A005971P1;Prudul26A006177P1;Prudul26A006215P1;Prudul26A007596P1;Prudul26A007647P1;Prudul26A008567P1;Prudul26A009578P1;Prudul26A011586P1;Prudul26A012059P1;Prudul26A012168P1;Prudul26A012395P1;Prudul26A013051P1;Pru…
Prudul26A005633P1	GO:0003700		GO:0019219	regulation of nucleobase-containing compound metabolic process	32	Prudul26A001568P1;Prudul26A001657P1;Prudul26A001748P1;Prudul26A001975P1;Prudul26A002073P1;Prudul26A004090P1;Prudul26A004090P2;Prudul26A005095P1;Prudul26A005633P1;Prudul26A005633P2;Prudul26A005971P1;Prudul26A006177P1;Prudul26A006215P1;Prudul26A007596P1;Prudul26A007647P1;Prudul26A008567P1;Prudul26A009578P1;Prudul26A011586P1;Prudul26A012059P1;Prudul26A012168P1;Prudul26A012395P1;Prudul26A013051P1;Pru…
Prudul26A005633P1	GO:0043565		GO:0019222	regulation of metabolic process	32	Prudul26A001568P1;Prudul26A001657P1;Prudul26A001748P1;Prudul26A001975P1;Prudul26A002073P1;Prudul26A004090P1;Prudul26A004090P2;Prudul26A005095P1;Prudul26A005633P1;Prudul26A005633P2;Prudul26A005971P1;Prudul26A006177P1;Prudul26A006215P1;Prudul26A007596P1;Prudul26A007647P1;Prudul26A008567P1;Prudul26A009578P1;Prudul26A011586P1;Prudul26A012059P1;Prudul26A012168P1;Prudul26A012395P1;Prudul26A013051P1;Pru…
Prudul26A005633P2	GO:0006355		GO:0019438	aromatic compound biosynthetic process	32	Prudul26A001568P1;Prudul26A001657P1;Prudul26A001748P1;Prudul26A001975P1;Prudul26A002073P1;Prudul26A004090P1;Prudul26A004090P2;Prudul26A005095P1;Prudul26A005633P1;Prudul26A005633P2;Prudul26A005971P1;Prudul26A006177P1;Prudul26A006215P1;Prudul26A007596P1;Prudul26A007647P1;Prudul26A008567P1;Prudul26A009578P1;Prudul26A011586P1;Prudul26A012059P1;Prudul26A012168P1;Prudul26A012395P1;Prudul26A013051P1;Pru…
Prudul26A005633P2	GO:0003700		GO:0031323	regulation of cellular metabolic process	32	Prudul26A001568P1;Prudul26A001657P1;Prudul26A001748P1;Prudul26A001975P1;Prudul26A002073P1;Prudul26A004090P1;Prudul26A004090P2;Prudul26A005095P1;Prudul26A005633P1;Prudul26A005633P2;Prudul26A005971P1;Prudul26A006177P1;Prudul26A006215P1;Prudul26A007596P1;Prudul26A007647P1;Prudul26A008567P1;Prudul26A009578P1;Prudul26A011586P1;Prudul26A012059P1;Prudul26A012168P1;Prudul26A012395P1;Prudul26A013051P1;Pru…
Prudul26A005633P2	GO:0043565		GO:0031326	regulation of cellular biosynthetic process	32	Prudul26A001568P1;Prudul26A001657P1;Prudul26A001748P1;Prudul26A001975P1;Prudul26A002073P1;Prudul26A004090P1;Prudul26A004090P2;Prudul26A005095P1;Prudul26A005633P1;Prudul26A005633P2;Prudul26A005971P1;Prudul26A006177P1;Prudul26A006215P1;Prudul26A007596P1;Prudul26A007647P1;Prudul26A008567P1;Prudul26A009578P1;Prudul26A011586P1;Prudul26A012059P1;Prudul26A012168P1;Prudul26A012395P1;Prudul26A013051P1;Pru…
Prudul26A005971P1	GO:0006355		GO:0032774	RNA biosynthetic process	32	Prudul26A001568P1;Prudul26A001657P1;Prudul26A001748P1;Prudul26A001975P1;Prudul26A002073P1;Prudul26A004090P1;Prudul26A004090P2;Prudul26A005095P1;Prudul26A005633P1;Prudul26A005633P2;Prudul26A005971P1;Prudul26A006177P1;Prudul26A006215P1;Prudul26A007596P1;Prudul26A007647P1;Prudul26A008567P1;Prudul26A009578P1;Prudul26A011586P1;Prudul26A012059P1;Prudul26A012168P1;Prudul26A012395P1;Prudul26A013051P1;Pru…
Prudul26A005971P1	GO:0003700		GO:0034641	cellular nitrogen compound metabolic process	32	Prudul26A001568P1;Prudul26A001657P1;Prudul26A001748P1;Prudul26A001975P1;Prudul26A002073P1;Prudul26A004090P1;Prudul26A004090P2;Prudul26A005095P1;Prudul26A005633P1;Prudul26A005633P2;Prudul26A005971P1;Prudul26A006177P1;Prudul26A006215P1;Prudul26A007596P1;Prudul26A007647P1;Prudul26A008567P1;Prudul26A009578P1;Prudul26A011586P1;Prudul26A012059P1;Prudul26A012168P1;Prudul26A012395P1;Prudul26A013051P1;Pru…
Prudul26A005971P1	GO:0043565		GO:0034645	cellular macromolecule biosynthetic process	32	Prudul26A001568P1;Prudul26A001657P1;Prudul26A001748P1;Prudul26A001975P1;Prudul26A002073P1;Prudul26A004090P1;Prudul26A004090P2;Prudul26A005095P1;Prudul26A005633P1;Prudul26A005633P2;Prudul26A005971P1;Prudul26A006177P1;Prudul26A006215P1;Prudul26A007596P1;Prudul26A007647P1;Prudul26A008567P1;Prudul26A009578P1;Prudul26A011586P1;Prudul26A012059P1;Prudul26A012168P1;Prudul26A012395P1;Prudul26A013051P1;Pru…
Prudul26A006177P1	GO:0006355		GO:0034654	nucleobase-containing compound biosynthetic process	32	Prudul26A001568P1;Prudul26A001657P1;Prudul26A001748P1;Prudul26A001975P1;Prudul26A002073P1;Prudul26A004090P1;Prudul26A004090P2;Prudul26A005095P1;Prudul26A005633P1;Prudul26A005633P2;Prudul26A005971P1;Prudul26A006177P1;Prudul26A006215P1;Prudul26A007596P1;Prudul26A007647P1;Prudul26A008567P1;Prudul26A009578P1;Prudul26A011586P1;Prudul26A012059P1;Prudul26A012168P1;Prudul26A012395P1;Prudul26A013051P1;Pru…
Prudul26A006177P1	GO:0003700		GO:0043170	macromolecule metabolic process	32	Prudul26A001568P1;Prudul26A001657P1;Prudul26A001748P1;Prudul26A001975P1;Prudul26A002073P1;Prudul26A004090P1;Prudul26A004090P2;Prudul26A005095P1;Prudul26A005633P1;Prudul26A005633P2;Prudul26A005971P1;Prudul26A006177P1;Prudul26A006215P1;Prudul26A007596P1;Prudul26A007647P1;Prudul26A008567P1;Prudul26A009578P1;Prudul26A011586P1;Prudul26A012059P1;Prudul26A012168P1;Prudul26A012395P1;Prudul26A013051P1;Pru…
Prudul26A006177P1	GO:0043565		GO:0044237	cellular metabolic process	32	Prudul26A001568P1;Prudul26A001657P1;Prudul26A001748P1;Prudul26A001975P1;Prudul26A002073P1;Prudul26A004090P1;Prudul26A004090P2;Prudul26A005095P1;Prudul26A005633P1;Prudul26A005633P2;Prudul26A005971P1;Prudul26A006177P1;Prudul26A006215P1;Prudul26A007596P1;Prudul26A007647P1;Prudul26A008567P1;Prudul26A009578P1;Prudul26A011586P1;Prudul26A012059P1;Prudul26A012168P1;Prudul26A012395P1;Prudul26A013051P1;Pru…
Prudul26A006215P1	GO:0006355		GO:0044238	primary metabolic process	32	Prudul26A001568P1;Prudul26A001657P1;Prudul26A001748P1;Prudul26A001975P1;Prudul26A002073P1;Prudul26A004090P1;Prudul26A004090P2;Prudul26A005095P1;Prudul26A005633P1;Prudul26A005633P2;Prudul26A005971P1;Prudul26A006177P1;Prudul26A006215P1;Prudul26A007596P1;Prudul26A007647P1;Prudul26A008567P1;Prudul26A009578P1;Prudul26A011586P1;Prudul26A012059P1;Prudul26A012168P1;Prudul26A012395P1;Prudul26A013051P1;Pru…
Prudul26A006215P1	GO:0003700		GO:0044249	cellular biosynthetic process	32	Prudul26A001568P1;Prudul26A001657P1;Prudul26A001748P1;Prudul26A001975P1;Prudul26A002073P1;Prudul26A004090P1;Prudul26A004090P2;Prudul26A005095P1;Prudul26A005633P1;Prudul26A005633P2;Prudul26A005971P1;Prudul26A006177P1;Prudul26A006215P1;Prudul26A007596P1;Prudul26A007647P1;Prudul26A008567P1;Prudul26A009578P1;Prudul26A011586P1;Prudul26A012059P1;Prudul26A012168P1;Prudul26A012395P1;Prudul26A013051P1;Pru…
Prudul26A006215P1	GO:0043565		GO:0044260	cellular macromolecule metabolic process	32	Prudul26A001568P1;Prudul26A001657P1;Prudul26A001748P1;Prudul26A001975P1;Prudul26A002073P1;Prudul26A004090P1;Prudul26A004090P2;Prudul26A005095P1;Prudul26A005633P1;Prudul26A005633P2;Prudul26A005971P1;Prudul26A006177P1;Prudul26A006215P1;Prudul26A007596P1;Prudul26A007647P1;Prudul26A008567P1;Prudul26A009578P1;Prudul26A011586P1;Prudul26A012059P1;Prudul26A012168P1;Prudul26A012395P1;Prudul26A013051P1;Pru…
Prudul26A007596P1	GO:0006355		GO:0044271	cellular nitrogen compound biosynthetic process	32	Prudul26A001568P1;Prudul26A001657P1;Prudul26A001748P1;Prudul26A001975P1;Prudul26A002073P1;Prudul26A004090P1;Prudul26A004090P2;Prudul26A005095P1;Prudul26A005633P1;Prudul26A005633P2;Prudul26A005971P1;Prudul26A006177P1;Prudul26A006215P1;Prudul26A007596P1;Prudul26A007647P1;Prudul26A008567P1;Prudul26A009578P1;Prudul26A011586P1;Prudul26A012059P1;Prudul26A012168P1;Prudul26A012395P1;Prudul26A013051P1;Pru…
Prudul26A007596P1	GO:0003700		GO:0046483	heterocycle metabolic process	32	Prudul26A001568P1;Prudul26A001657P1;Prudul26A001748P1;Prudul26A001975P1;Prudul26A002073P1;Prudul26A004090P1;Prudul26A004090P2;Prudul26A005095P1;Prudul26A005633P1;Prudul26A005633P2;Prudul26A005971P1;Prudul26A006177P1;Prudul26A006215P1;Prudul26A007596P1;Prudul26A007647P1;Prudul26A008567P1;Prudul26A009578P1;Prudul26A011586P1;Prudul26A012059P1;Prudul26A012168P1;Prudul26A012395P1;Prudul26A013051P1;Pru…
Prudul26A007596P1	GO:0043565		GO:0050789	regulation of biological process	32	Prudul26A001568P1;Prudul26A001657P1;Prudul26A001748P1;Prudul26A001975P1;Prudul26A002073P1;Prudul26A004090P1;Prudul26A004090P2;Prudul26A005095P1;Prudul26A005633P1;Prudul26A005633P2;Prudul26A005971P1;Prudul26A006177P1;Prudul26A006215P1;Prudul26A007596P1;Prudul26A007647P1;Prudul26A008567P1;Prudul26A009578P1;Prudul26A011586P1;Prudul26A012059P1;Prudul26A012168P1;Prudul26A012395P1;Prudul26A013051P1;Pru…
Prudul26A007647P1	GO:0006355		GO:0050794	regulation of cellular process	32	Prudul26A001568P1;Prudul26A001657P1;Prudul26A001748P1;Prudul26A001975P1;Prudul26A002073P1;Prudul26A004090P1;Prudul26A004090P2;Prudul26A005095P1;Prudul26A005633P1;Prudul26A005633P2;Prudul26A005971P1;Prudul26A006177P1;Prudul26A006215P1;Prudul26A007596P1;Prudul26A007647P1;Prudul26A008567P1;Prudul26A009578P1;Prudul26A011586P1;Prudul26A012059P1;Prudul26A012168P1;Prudul26A012395P1;Prudul26A013051P1;Pru…
Prudul26A007647P1	GO:0003700		GO:0051171	regulation of nitrogen compound metabolic process	32	Prudul26A001568P1;Prudul26A001657P1;Prudul26A001748P1;Prudul26A001975P1;Prudul26A002073P1;Prudul26A004090P1;Prudul26A004090P2;Prudul26A005095P1;Prudul26A005633P1;Prudul26A005633P2;Prudul26A005971P1;Prudul26A006177P1;Prudul26A006215P1;Prudul26A007596P1;Prudul26A007647P1;Prudul26A008567P1;Prudul26A009578P1;Prudul26A011586P1;Prudul26A012059P1;Prudul26A012168P1;Prudul26A012395P1;Prudul26A013051P1;Pru…
Prudul26A007647P1	GO:0043565		GO:0051252	regulation of RNA metabolic process	32	Prudul26A001568P1;Prudul26A001657P1;Prudul26A001748P1;Prudul26A001975P1;Prudul26A002073P1;Prudul26A004090P1;Prudul26A004090P2;Prudul26A005095P1;Prudul26A005633P1;Prudul26A005633P2;Prudul26A005971P1;Prudul26A006177P1;Prudul26A006215P1;Prudul26A007596P1;Prudul26A007647P1;Prudul26A008567P1;Prudul26A009578P1;Prudul26A011586P1;Prudul26A012059P1;Prudul26A012168P1;Prudul26A012395P1;Prudul26A013051P1;Pru…
Prudul26A008567P1	GO:0006355		GO:0060255	regulation of macromolecule metabolic process	32	Prudul26A001568P1;Prudul26A001657P1;Prudul26A001748P1;Prudul26A001975P1;Prudul26A002073P1;Prudul26A004090P1;Prudul26A004090P2;Prudul26A005095P1;Prudul26A005633P1;Prudul26A005633P2;Prudul26A005971P1;Prudul26A006177P1;Prudul26A006215P1;Prudul26A007596P1;Prudul26A007647P1;Prudul26A008567P1;Prudul26A009578P1;Prudul26A011586P1;Prudul26A012059P1;Prudul26A012168P1;Prudul26A012395P1;Prudul26A013051P1;Pru…
Prudul26A008567P1	GO:0003700		GO:0065007	biological regulation	32	Prudul26A001568P1;Prudul26A001657P1;Prudul26A001748P1;Prudul26A001975P1;Prudul26A002073P1;Prudul26A004090P1;Prudul26A004090P2;Prudul26A005095P1;Prudul26A005633P1;Prudul26A005633P2;Prudul26A005971P1;Prudul26A006177P1;Prudul26A006215P1;Prudul26A007596P1;Prudul26A007647P1;Prudul26A008567P1;Prudul26A009578P1;Prudul26A011586P1;Prudul26A012059P1;Prudul26A012168P1;Prudul26A012395P1;Prudul26A013051P1;Pru…
Prudul26A008567P1	GO:0043565		GO:0071704	organic substance metabolic process	32	Prudul26A001568P1;Prudul26A001657P1;Prudul26A001748P1;Prudul26A001975P1;Prudul26A002073P1;Prudul26A004090P1;Prudul26A004090P2;Prudul26A005095P1;Prudul26A005633P1;Prudul26A005633P2;Prudul26A005971P1;Prudul26A006177P1;Prudul26A006215P1;Prudul26A007596P1;Prudul26A007647P1;Prudul26A008567P1;Prudul26A009578P1;Prudul26A011586P1;Prudul26A012059P1;Prudul26A012168P1;Prudul26A012395P1;Prudul26A013051P1;Pru…
Prudul26A009578P1	GO:0006355		GO:0080090	regulation of primary metabolic process	32	Prudul26A001568P1;Prudul26A001657P1;Prudul26A001748P1;Prudul26A001975P1;Prudul26A002073P1;Prudul26A004090P1;Prudul26A004090P2;Prudul26A005095P1;Prudul26A005633P1;Prudul26A005633P2;Prudul26A005971P1;Prudul26A006177P1;Prudul26A006215P1;Prudul26A007596P1;Prudul26A007647P1;Prudul26A008567P1;Prudul26A009578P1;Prudul26A011586P1;Prudul26A012059P1;Prudul26A012168P1;Prudul26A012395P1;Prudul26A013051P1;Pru…
Prudul26A009578P1	GO:0003700		GO:0090304	nucleic acid metabolic process	32	Prudul26A001568P1;Prudul26A001657P1;Prudul26A001748P1;Prudul26A001975P1;Prudul26A002073P1;Prudul26A004090P1;Prudul26A004090P2;Prudul26A005095P1;Prudul26A005633P1;Prudul26A005633P2;Prudul26A005971P1;Prudul26A006177P1;Prudul26A006215P1;Prudul26A007596P1;Prudul26A007647P1;Prudul26A008567P1;Prudul26A009578P1;Prudul26A011586P1;Prudul26A012059P1;Prudul26A012168P1;Prudul26A012395P1;Prudul26A013051P1;Pru…
Prudul26A009578P1	GO:0043565		GO:0097659	nucleic acid-templated transcription	32	Prudul26A001568P1;Prudul26A001657P1;Prudul26A001748P1;Prudul26A001975P1;Prudul26A002073P1;Prudul26A004090P1;Prudul26A004090P2;Prudul26A005095P1;Prudul26A005633P1;Prudul26A005633P2;Prudul26A005971P1;Prudul26A006177P1;Prudul26A006215P1;Prudul26A007596P1;Prudul26A007647P1;Prudul26A008567P1;Prudul26A009578P1;Prudul26A011586P1;Prudul26A012059P1;Prudul26A012168P1;Prudul26A012395P1;Prudul26A013051P1;Pru…
Prudul26A011586P1	GO:0006355		GO:1901360	organic cyclic compound metabolic process	32	Prudul26A001568P1;Prudul26A001657P1;Prudul26A001748P1;Prudul26A001975P1;Prudul26A002073P1;Prudul26A004090P1;Prudul26A004090P2;Prudul26A005095P1;Prudul26A005633P1;Prudul26A005633P2;Prudul26A005971P1;Prudul26A006177P1;Prudul26A006215P1;Prudul26A007596P1;Prudul26A007647P1;Prudul26A008567P1;Prudul26A009578P1;Prudul26A011586P1;Prudul26A012059P1;Prudul26A012168P1;Prudul26A012395P1;Prudul26A013051P1;Pru…
Prudul26A011586P1	GO:0003700		GO:1901362	organic cyclic compound biosynthetic process	32	Prudul26A001568P1;Prudul26A001657P1;Prudul26A001748P1;Prudul26A001975P1;Prudul26A002073P1;Prudul26A004090P1;Prudul26A004090P2;Prudul26A005095P1;Prudul26A005633P1;Prudul26A005633P2;Prudul26A005971P1;Prudul26A006177P1;Prudul26A006215P1;Prudul26A007596P1;Prudul26A007647P1;Prudul26A008567P1;Prudul26A009578P1;Prudul26A011586P1;Prudul26A012059P1;Prudul26A012168P1;Prudul26A012395P1;Prudul26A013051P1;Pru…
Prudul26A011586P1	GO:0043565		GO:1901576	organic substance biosynthetic process	32	Prudul26A001568P1;Prudul26A001657P1;Prudul26A001748P1;Prudul26A001975P1;Prudul26A002073P1;Prudul26A004090P1;Prudul26A004090P2;Prudul26A005095P1;Prudul26A005633P1;Prudul26A005633P2;Prudul26A005971P1;Prudul26A006177P1;Prudul26A006215P1;Prudul26A007596P1;Prudul26A007647P1;Prudul26A008567P1;Prudul26A009578P1;Prudul26A011586P1;Prudul26A012059P1;Prudul26A012168P1;Prudul26A012395P1;Prudul26A013051P1;Pru…
Prudul26A012059P1	GO:0006355		GO:1903506	regulation of nucleic acid-templated transcription	32	Prudul26A001568P1;Prudul26A001657P1;Prudul26A001748P1;Prudul26A001975P1;Prudul26A002073P1;Prudul26A004090P1;Prudul26A004090P2;Prudul26A005095P1;Prudul26A005633P1;Prudul26A005633P2;Prudul26A005971P1;Prudul26A006177P1;Prudul26A006215P1;Prudul26A007596P1;Prudul26A007647P1;Prudul26A008567P1;Prudul26A009578P1;Prudul26A011586P1;Prudul26A012059P1;Prudul26A012168P1;Prudul26A012395P1;Prudul26A013051P1;Pru…
Prudul26A012059P1	GO:0003700		GO:2000112	regulation of cellular macromolecule biosynthetic process	32	Prudul26A001568P1;Prudul26A001657P1;Prudul26A001748P1;Prudul26A001975P1;Prudul26A002073P1;Prudul26A004090P1;Prudul26A004090P2;Prudul26A005095P1;Prudul26A005633P1;Prudul26A005633P2;Prudul26A005971P1;Prudul26A006177P1;Prudul26A006215P1;Prudul26A007596P1;Prudul26A007647P1;Prudul26A008567P1;Prudul26A009578P1;Prudul26A011586P1;Prudul26A012059P1;Prudul26A012168P1;Prudul26A012395P1;Prudul26A013051P1;Pru…
Prudul26A012059P1	GO:0043565		GO:2001141	regulation of RNA biosynthetic process	32	Prudul26A001568P1;Prudul26A001657P1;Prudul26A001748P1;Prudul26A001975P1;Prudul26A002073P1;Prudul26A004090P1;Prudul26A004090P2;Prudul26A005095P1;Prudul26A005633P1;Prudul26A005633P2;Prudul26A005971P1;Prudul26A006177P1;Prudul26A006215P1;Prudul26A007596P1;Prudul26A007647P1;Prudul26A008567P1;Prudul26A009578P1;Prudul26A011586P1;Prudul26A012059P1;Prudul26A012168P1;Prudul26A012395P1;Prudul26A013051P1;Pru…
Prudul26A012168P1	GO:0006355
Prudul26A012168P1	GO:0003700
Prudul26A012168P1	GO:0043565
Prudul26A012395P1	GO:0006355
Prudul26A012395P1	GO:0003700
Prudul26A012395P1	GO:0043565
Prudul26A013051P1	GO:0006355
Prudul26A013051P1	GO:0003700
Prudul26A013051P1	GO:0043565
Prudul26A013051P2	GO:0006355
Prudul26A013051P2	GO:0003700
Prudul26A013051P2	GO:0043565
Prudul26A013566P1	GO:0006355
Prudul26A013566P1	GO:0003700
Prudul26A013566P1	GO:0043565
Prudul26A014175P1	GO:0006355
Prudul26A014175P1	GO:0003700
Prudul26A014175P1	GO:0043565
Prudul26A015240P1	GO:0006355
Prudul26A015240P1	GO:0003700
Prudul26A015240P1	GO:0043565
Prudul26A015786P1	GO:0006355
Prudul26A015786P1	GO:0003700
Prudul26A015786P1	GO:0043565
Prudul26A017436P1	GO:0006355
Prudul26A017436P1	GO:0003700
Prudul26A017436P1	GO:0043565
Prudul26A017718P1	GO:0006355
Prudul26A017718P1	GO:0003700
Prudul26A017718P1	GO:0043565
Prudul26A017718P2	GO:0006355
Prudul26A017718P2	GO:0003700
Prudul26A017718P2	GO:0043565
Prudul26A018032P1	GO:0006355
Prudul26A018032P1	GO:0003700
Prudul26A018032P1	GO:0043565
Prudul26A019298P1	GO:0006355
Prudul26A019298P1	GO:0003700
Prudul26A019298P1	GO:0043565
