# Supplementary material for: Characterization of the WRKY gene family reveals its contribution to the adaptability of almond (Prunus dulcis)
Source: PeerJ. 2022 Jul 4;10:e13491. doi: 10.7717/peerj.13491 (PMC9261925; doi:10.7717/peerj.13491)
Supplement: Supplemental Information 14 [file peerj-10-13491-s014.xlsx]

## Sheet: sheet1
Prediction and analysis of potential PdWRKY target genes
Target genes prediction						Protein domain annotation results			GO enrichment annotation			KEGG pathway annotation
WRKY motif	Target genes	Start	Stop	P-value	Matched sequence	Target genes	InterProScan ID	Description	Target genes	GO id	Description	Target genes	KO id	Description
MA1298.1	Prudul26A020258C1	76	86	3.04e-07	AAAAGTCAACG	Prudul26A000031C1	IPR012392	Very-long-chain 3-ketoacyl-CoA synthase	Prudul26A000031C1	GO:0016020	Cellular Component:membrane	Prudul26A010711C1	K07952	ADP-ribosylation factor related protein 1
MA1298.1	Prudul26A007581C1	359	369	3.04e-07	AAAAGTCAACG	Prudul26A000031C1	IPR013601	FAE1/Type III polyketide synthase-like protein	Prudul26A000031C1	GO:0003824	Molecular Function:catalytic activity	Prudul26A016592C1	K05387	glutamate receptor, ionotropic, plant
MA1298.1	Prudul26A016766C1	458	468	3.04e-07	AAAAGTCAACG	Prudul26A000031C1	IPR013747	3-Oxoacyl-[acyl-carrier-protein (ACP)] synthase III, C-terminal	Prudul26A000031C1	GO:0016747	Molecular Function:transferase activity, transferring acyl groups other than amino-acyl groups	Prudul26A026036C1	K05387	glutamate receptor, ionotropic, plant
MA1298.1	Prudul26A019176C1	598	608	3.04e-07	AAAAGTCAACG	Prudul26A000031C1	IPR016039	Thiolase-like	Prudul26A000322C1	GO:0005515	Molecular Function:protein binding	Prudul26A004526C1	K00134	glyceraldehyde 3-phosphate dehydrogenase [EC:1.2.1.12]
MA1298.1	Prudul26A016358C1	664	674	3.04e-07	AAAAGTCAACG	Prudul26A000265C1	IPR007700	Protein of unknown function DUF668	Prudul26A000399C1	GO:0006355	Biological Process:regulation of transcription, DNA-templated	Prudul26A011498C1	K07374	tubulin alpha
MA1298.1	Prudul26A016358C2	664	674	3.04e-07	AAAAGTCAACG	Prudul26A000265C1	IPR021864	Protein of unknown function DUF3475	Prudul26A000399C1	GO:0008270	Molecular Function:zinc ion binding	Prudul26A011498C1	K07374	tubulin alpha
MA1298.1	Prudul26A020411C1	704	714	3.04e-07	AAAAGTCAACG	Prudul26A000265C2	IPR007700	Protein of unknown function DUF668	Prudul26A000399C2	GO:0006355	Biological Process:regulation of transcription, DNA-templated	Prudul26A011498C1	K07374	tubulin alpha
MA1298.1	Prudul26A017792C1	935	945	3.04e-07	AAAAGTCAACG	Prudul26A000265C2	IPR021864	Protein of unknown function DUF3475	Prudul26A000399C2	GO:0008270	Molecular Function:zinc ion binding	Prudul26A013787C1	K09422	transcription factor MYB, plant
MA1298.1	Prudul26A018845C1	948	958	3.04e-07	AAAAGTCAACG	Prudul26A000322C1	IPR011990	Tetratricopeptide-like helical domain superfamily	Prudul26A000399C3	GO:0006355	Biological Process:regulation of transcription, DNA-templated	Prudul26A020899C1	K09285	AP2-like factor, ANT lineage
MA1298.1	Prudul26A026196C1	990	1000	3.04e-07	AAAAGTCAACG	Prudul26A000322C1	IPR013026	Tetratricopeptide repeat-containing domain	Prudul26A000399C3	GO:0008270	Molecular Function:zinc ion binding	Prudul26A020899C2	K09285	AP2-like factor, ANT lineage
MA1298.1	Prudul26A008268C1	1272	1282	3.04e-07	AAAAGTCAACG	Prudul26A000399C1	IPR004330	FAR1 DNA binding domain	Prudul26A000399C4	GO:0006355	Biological Process:regulation of transcription, DNA-templated	Prudul26A019744C1	K09287	RAV-like factor
MA1298.1	Prudul26A020870C1	1300	1310	3.04e-07	AAAAGTCAACG	Prudul26A000399C1	IPR007527	Zinc finger, SWIM-type	Prudul26A000399C4	GO:0008270	Molecular Function:zinc ion binding	Prudul26A011297C1	K03259	translation initiation factor 4E
MA1298.1	Prudul26A006300C1	1460	1470	3.04e-07	AAAAGTCAACG	Prudul26A000399C1	IPR018289	MULE transposase domain	Prudul26A000803C1	GO:0046983	Molecular Function:protein dimerization activity	Prudul26A019219C1	K03256	tRNA (adenine58-N1)-methyltransferase non-catalytic subunit
MA1298.1	Prudul26A027678T4	1790	1800	3.04e-07	AAAAGTCAACG	Prudul26A000399C1	IPR031052	FHY3/FAR1 family	Prudul26A000856C1	GO:0005515	Molecular Function:protein binding	Prudul26A006018C1	K13114	pinin
MA1298.1	Prudul26A027678C1	1790	1800	3.04e-07	AAAAGTCAACG	Prudul26A000399C2	IPR004330	FAR1 DNA binding domain	Prudul26A000859C1	GO:0006629	Biological Process:lipid metabolic process	Prudul26A020870C1	K14300	nuclear pore complex protein Nup133
MA1298.1	Prudul26A027678C2	1790	1800	3.04e-07	AAAAGTCAACG	Prudul26A000399C2	IPR007527	Zinc finger, SWIM-type	Prudul26A001058C1	GO:0006468	Biological Process:protein phosphorylation	Prudul26A011297C1	K03259	translation initiation factor 4E
MA1298.1	Prudul26A027678C3	1790	1800	3.04e-07	AAAAGTCAACG	Prudul26A000399C2	IPR018289	MULE transposase domain	Prudul26A001058C1	GO:0005524	Molecular Function:ATP binding	Prudul26A028796C1	K18655	ATP-dependent RNA helicase DDX19/DBP5 [EC:3.6.4.13]
MA1298.1	Prudul26A025438C1	1791	1801	3.04e-07	AAAAGTCAACG	Prudul26A000399C2	IPR031052	FHY3/FAR1 family	Prudul26A001058C1	GO:0005524	Molecular Function:ATP binding	Prudul26A000322C1	K12867	pre-mRNA-splicing factor SYF1
MA1298.1	Prudul26A009693C1	1816	1826	3.04e-07	AAAAGTCAACG	Prudul26A000399C3	IPR004330	FAR1 DNA binding domain	Prudul26A001058C1	GO:0004672	Molecular Function:protein kinase activity	Prudul26A025255C1	K03265	peptide chain release factor subunit 1
MA1298.1	Prudul26A014874C1	1816	1826	3.04e-07	AAAAGTCAACG	Prudul26A000399C3	IPR007527	Zinc finger, SWIM-type	Prudul26A001085C1	GO:0005515	Molecular Function:protein binding	Prudul26A004886C1	K14326	regulator of nonsense transcripts 1 [EC:3.6.4.-]
MA1298.1	Prudul26A010550C1	1859	1869	3.04e-07	AAAAGTCAACG	Prudul26A000399C3	IPR018289	MULE transposase domain	Prudul26A001093C1	GO:0003824	Molecular Function:catalytic activity	Prudul26A001680C1	K14844	pumilio homology domain family member 6
MA1298.1	Prudul26A009506C1	26	36	3.04e-07	AAAAGTCAACG	Prudul26A000399C3	IPR031052	FHY3/FAR1 family	Prudul26A001133C1	GO:0055114	Biological Process:oxidation-reduction process	Prudul26A011297C1	K03259	translation initiation factor 4E
MA1298.1	Prudul26A028969C1	104	114	3.04e-07	AAAAGTCAACG	Prudul26A000399C4	IPR004330	FAR1 DNA binding domain	Prudul26A001133C1	GO:0016491	Molecular Function:oxidoreductase activity	Prudul26A004886C1	K14326	regulator of nonsense transcripts 1 [EC:3.6.4.-]
MA1298.1	Prudul26A009037C1	195	205	3.04e-07	AAAAGTCAACG	Prudul26A000399C4	IPR007527	Zinc finger, SWIM-type	Prudul26A001586C1	GO:0016747	Molecular Function:transferase activity, transferring acyl groups other than amino-acyl groups	Prudul26A011498C1	K07374	tubulin alpha
MA1298.1	Prudul26A000803C1	382	392	3.04e-07	AAAAGTCAACG	Prudul26A000399C4	IPR018289	MULE transposase domain	Prudul26A001680C1	GO:0003723	Molecular Function:RNA binding	Prudul26A012454C1	K03013	DNA-directed RNA polymerases I, II, and III subunit RPABC1
MA1298.1	Prudul26A032080C1	548	558	3.04e-07	AAAAGTCAACG	Prudul26A000399C4	IPR031052	FHY3/FAR1 family	Prudul26A002153C1	GO:0005509	Molecular Function:calcium ion binding	Prudul26A019164C1	K15188	cyclin T
MA1298.1	Prudul26A001093C1	585	595	3.04e-07	AAAAGTCAACG	Prudul26A000635C1	IPR012438	Protein of unknown function DUF1639	Prudul26A002304C1	GO:0005634	Cellular Component:nucleus	Prudul26A019164C1	K15188	cyclin T
MA1298.1	Prudul26A003130C1	660	670	3.04e-07	AAAAGTCAACG	Prudul26A000730C1	IPR013865	Protein of unknown function DUF1754, eukaryotic	Prudul26A002746C1	GO:0005515	Molecular Function:protein binding	Prudul26A019164C1	K15188	cyclin T
MA1298.1	Prudul26A013560C3	903	913	3.04e-07	AAAAGTCAACG	Prudul26A000803C1	IPR011598	Myc-type, basic helix-loop-helix (bHLH) domain	Prudul26A002771C1	GO:0055085	Biological Process:transmembrane transport	Prudul26A017792C1	K03022	DNA-directed RNA polymerase III subunit RPC8
MA1298.1	Prudul26A013560C2	903	913	3.04e-07	AAAAGTCAACG	Prudul26A000803C1	IPR025610	Transcription factor MYC/MYB N-terminal	Prudul26A002771C1	GO:0016020	Cellular Component:membrane	Prudul26A012454C1	K03013	DNA-directed RNA polymerases I, II, and III subunit RPABC1
MA1298.1	Prudul26A013560C1	903	913	3.04e-07	AAAAGTCAACG	Prudul26A000803C1	IPR036638	Helix-loop-helix DNA-binding domain superfamily	Prudul26A002771C1	GO:0022857	Molecular Function:transmembrane transporter activity	Prudul26A012454C1	K03013	DNA-directed RNA polymerases I, II, and III subunit RPABC1
MA1298.1	Prudul26A000859C1	1132	1142	3.04e-07	AAAAGTCAACG	Prudul26A000856C1	IPR001611	Leucine-rich repeat	Prudul26A002953C1	GO:0005515	Molecular Function:protein binding	Prudul26A023810C1	K11654	SWI/SNF-related matrix-associated actin-dependent regulator of chromatin subfamily A member 5 [EC:3.6.4.-]
MA1298.1	Prudul26A018686C1	1133	1143	3.04e-07	AAAAGTCAACG	Prudul26A000856C1	IPR001810	F-box domain	Prudul26A003031C1	GO:0005576	Cellular Component:extracellular region	Prudul26A006619C1	K15032	mTERF domain-containing protein, mitochondrial
MA1298.1	Prudul26A019164C1	1284	1294	3.04e-07	AAAAGTCAACG	Prudul26A000856C1	IPR032675	Leucine-rich repeat domain superfamily	Prudul26A003130C1	GO:0006535	Biological Process:cysteine biosynthetic process from serine	Prudul26A006619C2	K15032	mTERF domain-containing protein, mitochondrial
MA1298.1	Prudul26A002771C1	1440	1450	3.04e-07	AAAAGTCAACG	Prudul26A000856C1	IPR036047	F-box-like domain superfamily	Prudul26A003130C1	GO:0005737	Cellular Component:cytoplasm	Prudul26A029913C1	K15032	mTERF domain-containing protein, mitochondrial
MA1298.1	Prudul26A025217C1	1623	1633	3.04e-07	AAAAGTCAACG	Prudul26A000859C1	IPR005804	Fatty acid desaturase domain	Prudul26A003130C1	GO:0009001	Molecular Function:serine O-acetyltransferase activity	Prudul26A017721C1	K12862	pleiotropic regulator 1
MA1298.1	Prudul26A013970C1	1656	1666	3.04e-07	AAAAGTCAACG	Prudul26A001058C1	IPR000719	Protein kinase domain	Prudul26A003130C1	GO:0016740	Molecular Function:transferase activity	Prudul26A000322C1	K12867	pre-mRNA-splicing factor SYF1
MA1298.1	Prudul26A024325C1	1662	1672	3.04e-07	AAAAGTCAACG	Prudul26A001058C1	IPR011009	Protein kinase-like domain superfamily	Prudul26A003314C2	GO:0007165	Biological Process:signal transduction	Prudul26A012203C1	K13103	tuftelin-interacting protein 11
MA1298.1	Prudul26A013551C2	1824	1834	3.04e-07	AAAAGTCAACG	Prudul26A001058C1	IPR017441	Protein kinase, ATP binding site	Prudul26A003314C2	GO:0043531	Molecular Function:ADP binding	Prudul26A012203C2	K13103	tuftelin-interacting protein 11
MA1298.1	Prudul26A015974C1	1825	1835	3.04e-07	AAAAGTCAACG	Prudul26A001085C1	IPR001611	Leucine-rich repeat	Prudul26A003314C2	GO:0005515	Molecular Function:protein binding	Prudul26A012203C3	K13103	tuftelin-interacting protein 11
MA1298.1	Prudul26A024213C1	1827	1837	3.04e-07	AAAAGTCAACG	Prudul26A001085C1	IPR013210	Leucine-rich repeat-containing N-terminal, plant-type	Prudul26A003765C1	GO:0055114	Biological Process:oxidation-reduction process	Prudul26A012203C4	K13103	tuftelin-interacting protein 11
MA1298.1	Prudul26A024213C2	1827	1837	3.04e-07	AAAAGTCAACG	Prudul26A001085C1	IPR032675	Leucine-rich repeat domain superfamily	Prudul26A003765C1	GO:0016491	Molecular Function:oxidoreductase activity	Prudul26A017721C1	K12862	pleiotropic regulator 1
MA1298.1	Prudul26A030031C1	1863	1873	3.04e-07	AAAAGTCAACG	Prudul26A001093C1	IPR000873	AMP-dependent synthetase/ligase	Prudul26A003988C1	GO:0006355	Biological Process:regulation of transcription, DNA-templated	Prudul26A000322C1	K12867	pre-mRNA-splicing factor SYF1
MA1298.1	Prudul26A003765C1	1897	1907	3.04e-07	AAAAGTCAACG	Prudul26A001093C1	IPR020845	AMP-binding, conserved site	Prudul26A003988C1	GO:0008270	Molecular Function:zinc ion binding	Prudul26A006018C1	K13114	pinin
MA1298.1	Prudul26A030832C1	1	11	6.74e-07	AAAAGTCAACT	Prudul26A001093C1	IPR025110	AMP-binding enzyme, C-terminal domain	Prudul26A004250C1	GO:0006468	Biological Process:protein phosphorylation	Prudul26A004726C1	K13117	ATP-dependent RNA helicase DDX35 [EC:3.6.4.13]
MA1298.1	Prudul26A014497C1	10	20	6.74e-07	AAAAGTCAACT	Prudul26A001133C1	IPR018170	Aldo/keto reductase, conserved site	Prudul26A004250C1	GO:0005524	Molecular Function:ATP binding	Prudul26A008115C1	K13124	mitogen-activated protein kinase organizer 1
MA1298.1	Prudul26A019219C1	49	59	6.74e-07	AAAAGTCAACT	Prudul26A001133C1	IPR020471	Aldo/keto reductase	Prudul26A004250C1	GO:0004672	Molecular Function:protein kinase activity	Prudul26A022607C1	K13127	RING finger protein 113A
MA1298.1	Prudul26A009495C1	51	61	6.74e-07	AAAAGTCAACT	Prudul26A001133C1	IPR023210	NADP-dependent oxidoreductase domain	Prudul26A004340C1	GO:0004523	Molecular Function:RNA-DNA hybrid ribonuclease activity	Prudul26A012203C1	K13103	tuftelin-interacting protein 11
MA1298.1	Prudul26A009495C2	51	61	6.74e-07	AAAAGTCAACT	Prudul26A001133C1	IPR036812	NADP-dependent oxidoreductase domain superfamily	Prudul26A004340C1	GO:0003676	Molecular Function:nucleic acid binding	Prudul26A012203C2	K13103	tuftelin-interacting protein 11
MA1298.1	Prudul26A031793C1	58	68	6.74e-07	AAAAGTCAACT	Prudul26A001202C1	IPR010820	UBA-like domain DUF1421	Prudul26A004340C1	GO:0003676	Molecular Function:nucleic acid binding	Prudul26A012203C3	K13103	tuftelin-interacting protein 11
MA1298.1	Prudul26A011297C1	66	76	6.74e-07	AAAAGTCAACT	Prudul26A001586C1	IPR003480	Transferase	Prudul26A004526C1	GO:0006006	Biological Process:glucose metabolic process	Prudul26A012203C4	K13103	tuftelin-interacting protein 11
MA1298.1	Prudul26A006392C1	93	103	6.74e-07	AAAAGTCAACT	Prudul26A001586C1	IPR023213	Chloramphenicol acetyltransferase-like domain superfamily	Prudul26A004526C1	GO:0055114	Biological Process:oxidation-reduction process	Prudul26A012454C1	K03013	DNA-directed RNA polymerases I, II, and III subunit RPABC1
MA1298.1	Prudul26A005141C1	116	126	6.74e-07	AAAAGTCAACT	Prudul26A001680C1	IPR001313	Pumilio RNA-binding repeat	Prudul26A004526C1	GO:0051287	Molecular Function:NAD binding	Prudul26A031483C1	K03094	S-phase kinase-associated protein 1
MA1298.1	Prudul26A005113C1	117	127	6.74e-07	AAAAGTCAACT	Prudul26A001680C1	IPR011989	Armadillo-like helical	Prudul26A004526C1	GO:0050661	Molecular Function:NADP binding	Prudul26A031483C1	K03094	S-phase kinase-associated protein 1
MA1298.1	Prudul26A032892C1	129	139	6.74e-07	AAAAGTCAACT	Prudul26A001680C1	IPR012959	CPL domain	Prudul26A004526C1	GO:0016620	Molecular Function:oxidoreductase activity, acting on the aldehyde or oxo group of donors, NAD or NADP as acceptor	Prudul26A006626C1	K21842	protein EFR3
MA1298.1	Prudul26A000399C1	122	132	6.74e-07	AAAAGTCAACT	Prudul26A001680C1	IPR016024	Armadillo-type fold	Prudul26A004726C1	GO:0004386	Molecular Function:helicase activity	Prudul26A010711C1	K07952	ADP-ribosylation factor related protein 1
MA1298.1	Prudul26A000399C2	122	132	6.74e-07	AAAAGTCAACT	Prudul26A001680C1	IPR033133	Pumilio homology domain	Prudul26A004886C1	GO:0000184	Biological Process:nuclear-transcribed mRNA catabolic process, nonsense-mediated decay	Prudul26A023364C1	K20352	p24 family protein delta-1
MA1298.1	Prudul26A000399T4	122	132	6.74e-07	AAAAGTCAACT	Prudul26A001680C1	IPR040059	Pumilio homologue 3	Prudul26A004886C1	GO:0005737	Cellular Component:cytoplasm	Prudul26A004526C1	K00134	glyceraldehyde 3-phosphate dehydrogenase [EC:1.2.1.12]
MA1298.1	Prudul26A000399C3	122	132	6.74e-07	AAAAGTCAACT	Prudul26A002153C1	IPR002048	EF-hand domain	Prudul26A004886C1	GO:0005524	Molecular Function:ATP binding	Prudul26A016644C1	K00512	steroid 17alpha-monooxygenase / 17alpha-hydroxyprogesterone deacetylase [EC:1.14.14.19 1.14.14.32]
MA1298.1	Prudul26A025824C1	135	145	6.74e-07	AAAAGTCAACT	Prudul26A002153C1	IPR011992	EF-hand domain pair	Prudul26A004886C1	GO:0003677	Molecular Function:DNA binding	Prudul26A014980C1	K13260	isoflavone/4'-methoxyisoflavone 2'-hydroxylase [EC:1.14.14.90 1.14.14.89]
MA1298.1	Prudul26A029199C1	137	147	6.74e-07	AAAAGTCAACT	Prudul26A002153C1	IPR018247	EF-Hand 1, calcium-binding site	Prudul26A004886C1	GO:0004386	Molecular Function:helicase activity	Prudul26A014980C2	K13260	isoflavone/4'-methoxyisoflavone 2'-hydroxylase [EC:1.14.14.90 1.14.14.89]
MA1298.1	Prudul26A020923C1	160	170	6.74e-07	AAAAGTCAACT	Prudul26A002304C1	IPR004367	Cyclin, C-terminal domain	Prudul26A004886C1	GO:0016787	Molecular Function:hydrolase activity	Prudul26A015186C1	K04123	ent-kaurenoic acid monooxygenase [EC:1.14.14.107]
MA1298.1	Prudul26A006753C1	177	187	6.74e-07	AAAAGTCAACT	Prudul26A002304C1	IPR006671	Cyclin, N-terminal	Prudul26A004886C1	GO:0008270	Molecular Function:zinc ion binding	Prudul26A029558C1	K20667	beta-amyrin 28-monooxygenase [EC:1.14.14.126]
MA1298.1	Prudul26A030964C1	177	187	6.74e-07	AAAAGTCAACT	Prudul26A002304C1	IPR036915	Cyclin-like superfamily	Prudul26A004967C1	GO:0016787	Molecular Function:hydrolase activity	Prudul26A031834C1	K20667	beta-amyrin 28-monooxygenase [EC:1.14.14.126]
MA1298.1	Prudul26A022567C1	179	189	6.74e-07	AAAAGTCAACT	Prudul26A002304C1	IPR039361	Cyclin	Prudul26A005113C1	GO:0016758	Molecular Function:transferase activity, transferring hexosyl groups	Prudul26A031834C2	K20667	beta-amyrin 28-monooxygenase [EC:1.14.14.126]
MA1298.1	Prudul26A017349C2	172	182	6.74e-07	AAAAGTCAACT	Prudul26A002746C1	IPR001611	Leucine-rich repeat	Prudul26A005141C1	GO:0005515	Molecular Function:protein binding	Prudul26A011759C1	K00001	alcohol dehydrogenase [EC:1.1.1.1]
MA1298.1	Prudul26A017349C1	172	182	6.74e-07	AAAAGTCAACT	Prudul26A002746C1	IPR013210	Leucine-rich repeat-containing N-terminal, plant-type	Prudul26A005315C1	GO:0019856	Biological Process:pyrimidine nucleobase biosynthetic process	Prudul26A001133C1	K00011	aldehyde reductase [EC:1.1.1.21]
MA1298.1	Prudul26A020899C1	197	207	6.74e-07	AAAAGTCAACT	Prudul26A002746C1	IPR032675	Leucine-rich repeat domain superfamily	Prudul26A005315C1	GO:0004151	Molecular Function:dihydroorotase activity	Prudul26A020348C1	K18121	glyoxylate/succinic semialdehyde reductase [EC:1.1.1.79 1.1.1.-]
MA1298.1	Prudul26A020899C2	197	207	6.74e-07	AAAAGTCAACT	Prudul26A002771C1	IPR002293	Amino acid/polyamine transporter I	Prudul26A005315C1	GO:0016787	Molecular Function:hydrolase activity	Prudul26A020348C1	K18121	glyoxylate/succinic semialdehyde reductase [EC:1.1.1.79 1.1.1.-]
MA1298.1	Prudul26A012213C1	199	209	6.74e-07	AAAAGTCAACT	Prudul26A002771C1	IPR029485	Cationic amino acid transporter, C-terminal	Prudul26A005315C1	GO:0016812	Molecular Function:hydrolase activity, acting on carbon-nitrogen (but not peptide) bonds, in cyclic amides	Prudul26A004526C1	K00134	glyceraldehyde 3-phosphate dehydrogenase [EC:1.2.1.12]
MA1298.1	Prudul26A019723C1	200	210	6.74e-07	AAAAGTCAACT	Prudul26A002953C1	IPR000225	Armadillo	Prudul26A005315C2	GO:0019856	Biological Process:pyrimidine nucleobase biosynthetic process	Prudul26A025073C1	K09753	cinnamoyl-CoA reductase [EC:1.2.1.44]
MA1298.1	Prudul26A019723C2	200	210	6.74e-07	AAAAGTCAACT	Prudul26A002953C1	IPR011989	Armadillo-like helical	Prudul26A005315C2	GO:0004151	Molecular Function:dihydroorotase activity	Prudul26A009495C1	K17893	ubiquinol oxidase [EC:1.10.3.11]
MA1298.1	Prudul26A026785C1	207	217	6.74e-07	AAAAGTCAACT	Prudul26A002953C1	IPR016024	Armadillo-type fold	Prudul26A005315C2	GO:0016787	Molecular Function:hydrolase activity	Prudul26A009495C2	K17893	ubiquinol oxidase [EC:1.10.3.11]
MA1298.1	Prudul26A031449C1	209	219	6.74e-07	AAAAGTCAACT	Prudul26A003031C1	IPR001283	Cysteine-rich secretory protein, allergen V5/Tpx-1-related	Prudul26A005315C2	GO:0016812	Molecular Function:hydrolase activity, acting on carbon-nitrogen (but not peptide) bonds, in cyclic amides	Prudul26A029536C1	K00430	peroxidase [EC:1.11.1.7]
MA1298.1	Prudul26A004340C1	210	220	6.74e-07	AAAAGTCAACT	Prudul26A003031C1	IPR014044	CAP domain	Prudul26A005329C1	GO:0006355	Biological Process:regulation of transcription, DNA-templated	Prudul26A009013C1	K10712	cysteamine dioxygenase [EC:1.13.11.19]
MA1298.1	Prudul26A026295C1	225	235	6.74e-07	AAAAGTCAACT	Prudul26A003031C1	IPR018244	Allergen V5/Tpx-1-related, conserved site	Prudul26A005329C1	GO:0042393	Molecular Function:histone binding	Prudul26A031858C1	K04124	gibberellin 3beta-dioxygenase [EC:1.14.11.15]
MA1298.1	Prudul26A005362C1	218	228	6.74e-07	AAAAGTCAACT	Prudul26A003031C1	IPR035940	CAP superfamily	Prudul26A005329C2	GO:0006355	Biological Process:regulation of transcription, DNA-templated	Prudul26A016644C1	K00512	steroid 17alpha-monooxygenase / 17alpha-hydroxyprogesterone deacetylase [EC:1.14.14.19 1.14.14.32]
MA1298.1	Prudul26A025737C1	235	245	6.74e-07	AAAAGTCAACT	Prudul26A003130C1	IPR001451	Hexapeptide repeat	Prudul26A005329C2	GO:0042393	Molecular Function:histone binding	Prudul26A016644C1	K00512	steroid 17alpha-monooxygenase / 17alpha-hydroxyprogesterone deacetylase [EC:1.14.14.19 1.14.14.32]
MA1298.1	Prudul26A018965C1	240	250	6.74e-07	AAAAGTCAACT	Prudul26A003130C1	IPR005881	Serine O-acetyltransferase	Prudul26A005362C1	GO:0005515	Molecular Function:protein binding	Prudul26A014980C1	K13260	isoflavone/4'-methoxyisoflavone 2'-hydroxylase [EC:1.14.14.90 1.14.14.89]
MA1298.1	Prudul26A010378C1	259	269	6.74e-07	AAAAGTCAACT	Prudul26A003130C1	IPR010493	Serine acetyltransferase, N-terminal	Prudul26A005500C1	GO:0008270	Molecular Function:zinc ion binding	Prudul26A014980C2	K13260	isoflavone/4'-methoxyisoflavone 2'-hydroxylase [EC:1.14.14.90 1.14.14.89]
MA1298.1	Prudul26A003905C1	258	268	6.74e-07	AAAAGTCAACT	Prudul26A003130C1	IPR011004	Trimeric LpxA-like superfamily	Prudul26A005500C2	GO:0008270	Molecular Function:zinc ion binding	Prudul26A014980C1	K13260	isoflavone/4'-methoxyisoflavone 2'-hydroxylase [EC:1.14.14.90 1.14.14.89]
MA1298.1	Prudul26A016986C1	284	294	6.74e-07	AAAAGTCAACT	Prudul26A003130C1	IPR018357	Hexapeptide transferase, conserved site	Prudul26A005614C1	GO:0003677	Molecular Function:DNA binding	Prudul26A014980C2	K13260	isoflavone/4'-methoxyisoflavone 2'-hydroxylase [EC:1.14.14.90 1.14.14.89]
MA1298.1	Prudul26A007139C1	284	294	6.74e-07	AAAAGTCAACT	Prudul26A003314C2	IPR000157	Toll/interleukin-1 receptor homology (TIR) domain	Prudul26A005862C1	GO:0005509	Molecular Function:calcium ion binding	Prudul26A015186C1	K04123	ent-kaurenoic acid monooxygenase [EC:1.14.14.107]
MA1298.1	Prudul26A016986C2	284	294	6.74e-07	AAAAGTCAACT	Prudul26A003314C2	IPR002182	NB-ARC	Prudul26A005925C1	GO:0003676	Molecular Function:nucleic acid binding	Prudul26A029558C1	K20667	beta-amyrin 28-monooxygenase [EC:1.14.14.126]
MA1298.1	Prudul26A014497C2	291	301	6.74e-07	AAAAGTCAACT	Prudul26A003314C2	IPR027417	P-loop containing nucleoside triphosphate hydrolase	Prudul26A005925C1	GO:0005515	Molecular Function:protein binding	Prudul26A031834C1	K20667	beta-amyrin 28-monooxygenase [EC:1.14.14.126]
MA1298.1	Prudul26A014396C1	288	298	6.74e-07	AAAAGTCAACT	Prudul26A003314C2	IPR032675	Leucine-rich repeat domain superfamily	Prudul26A006300C1	GO:0006468	Biological Process:protein phosphorylation	Prudul26A031834C2	K20667	beta-amyrin 28-monooxygenase [EC:1.14.14.126]
MA1298.1	Prudul26A026744C1	312	322	6.74e-07	AAAAGTCAACT	Prudul26A003314C2	IPR035897	Toll/interleukin-1 receptor homology (TIR) domain superfamily	Prudul26A006300C1	GO:0005524	Molecular Function:ATP binding	Prudul26A000859C1	K10256	omega-6 fatty acid desaturase / acyl-lipid omega-6 desaturase (Delta-12 desaturase) [EC:1.14.19.6 1.14.19.22]
MA1298.1	Prudul26A025073C1	345	355	6.74e-07	AAAAGTCAACT	Prudul26A003765C1	IPR006076	FAD dependent oxidoreductase	Prudul26A006300C1	GO:0005524	Molecular Function:ATP binding	Prudul26A018686C1	K10256	omega-6 fatty acid desaturase / acyl-lipid omega-6 desaturase (Delta-12 desaturase) [EC:1.14.19.6 1.14.19.22]
MA1298.1	Prudul26A007179C1	349	359	6.74e-07	AAAAGTCAACT	Prudul26A003765C1	IPR036188	FAD/NAD(P)-binding domain superfamily	Prudul26A006300C1	GO:0004672	Molecular Function:protein kinase activity	Prudul26A000859C1	K10256	omega-6 fatty acid desaturase / acyl-lipid omega-6 desaturase (Delta-12 desaturase) [EC:1.14.19.6 1.14.19.22]
MA1298.1	Prudul26A007889C1	340	350	6.74e-07	AAAAGTCAACT	Prudul26A003988C1	IPR007527	Zinc finger, SWIM-type	Prudul26A006392C1	GO:0016021	Cellular Component:integral component of membrane	Prudul26A018686C1	K10256	omega-6 fatty acid desaturase / acyl-lipid omega-6 desaturase (Delta-12 desaturase) [EC:1.14.19.6 1.14.19.22]
MA1298.1	Prudul26A022396C1	373	383	6.74e-07	AAAAGTCAACT	Prudul26A003988C1	IPR031052	FHY3/FAR1 family	Prudul26A006619C1	GO:0006355	Biological Process:regulation of transcription, DNA-templated	Prudul26A003130C1	K00640	serine O-acetyltransferase [EC:2.3.1.30]
MA1298.1	Prudul26A022471C1	373	383	6.74e-07	AAAAGTCAACT	Prudul26A004250C1	IPR000719	Protein kinase domain	Prudul26A006619C1	GO:0003690	Molecular Function:double-stranded DNA binding	Prudul26A008268C1	K13065	shikimate O-hydroxycinnamoyltransferase [EC:2.3.1.133]
MA1298.1	Prudul26A012225C1	365	375	6.74e-07	AAAAGTCAACT	Prudul26A004250C1	IPR001245	Serine-threonine/tyrosine-protein kinase, catalytic domain	Prudul26A006619C2	GO:0006355	Biological Process:regulation of transcription, DNA-templated	Prudul26A001586C1	K19861	benzyl alcohol O-benzoyltransferase [EC:2.3.1.196 2.3.1.232]
MA1298.1	Prudul26A026809C2	383	393	6.74e-07	AAAAGTCAACT	Prudul26A004250C1	IPR011009	Protein kinase-like domain superfamily	Prudul26A006619C2	GO:0003690	Molecular Function:double-stranded DNA binding	Prudul26A000031C1	K15397	3-ketoacyl-CoA synthase [EC:2.3.1.199]
MA1298.1	Prudul26A025550C2	402	412	6.74e-07	AAAAGTCAACT	Prudul26A004340C1	IPR002156	Ribonuclease H domain	Prudul26A006626C1	GO:0072659	Biological Process:protein localization to plasma membrane	Prudul26A001586C1	K19861	benzyl alcohol O-benzoyltransferase [EC:2.3.1.196 2.3.1.232]
MA1298.1	Prudul26A031642C1	404	414	6.74e-07	AAAAGTCAACT	Prudul26A004340C1	IPR012337	Ribonuclease H-like superfamily	Prudul26A006696C1	GO:0045454	Biological Process:cell redox homeostasis	Prudul26A011912C1	K10581	ubiquitin-conjugating enzyme E2 O [EC:2.3.2.24]
MA1298.1	Prudul26A018130C1	409	419	6.74e-07	AAAAGTCAACT	Prudul26A004340C1	IPR036397	Ribonuclease H superfamily	Prudul26A006696C1	GO:0006662	Biological Process:glycerol ether metabolic process	Prudul26A021739C1	K10632	BRCA1-associated protein [EC:2.3.2.27]
MA1298.1	Prudul26A031625C1	424	434	6.74e-07	AAAAGTCAACT	Prudul26A004526C1	IPR006424	Glyceraldehyde-3-phosphate dehydrogenase, type I	Prudul26A006696C1	GO:0015035	Molecular Function:protein disulfide oxidoreductase activity	Prudul26A013970C1	K10664	E3 ubiquitin-protein ligase ATL6/9/15/31/42/55 [EC:2.3.2.27]
MA1298.1	Prudul26A019744C1	414	424	6.74e-07	AAAAGTCAACT	Prudul26A004526C1	IPR020828	Glyceraldehyde 3-phosphate dehydrogenase, NAD(P) binding domain	Prudul26A007025C1	GO:0006807	Biological Process:nitrogen compound metabolic process	Prudul26A032080C1	K10664	E3 ubiquitin-protein ligase ATL6/9/15/31/42/55 [EC:2.3.2.27]
MA1298.1	Prudul26A021486C1	426	436	6.74e-07	AAAAGTCAACT	Prudul26A004526C1	IPR020829	Glyceraldehyde 3-phosphate dehydrogenase, catalytic domain	Prudul26A007025C2	GO:0006807	Biological Process:nitrogen compound metabolic process	Prudul26A017349C1	K00793	riboflavin synthase [EC:2.5.1.9]
MA1298.1	Prudul26A026794C1	434	444	6.74e-07	AAAAGTCAACT	Prudul26A004526C1	IPR020830	Glyceraldehyde 3-phosphate dehydrogenase, active site	Prudul26A007025C3	GO:0006807	Biological Process:nitrogen compound metabolic process	Prudul26A017349C2	K00793	riboflavin synthase [EC:2.5.1.9]
MA1298.1	Prudul26A008940C1	442	452	6.74e-07	AAAAGTCAACT	Prudul26A004526C1	IPR020831	Glyceraldehyde/Erythrose phosphate dehydrogenase family	Prudul26A007025C4	GO:0006807	Biological Process:nitrogen compound metabolic process	Prudul26A014396C1	K05955	protein farnesyltransferase/geranylgeranyltransferase type-1 subunit alpha [EC:2.5.1.58 2.5.1.59]
MA1298.1	Prudul26A004967C1	443	453	6.74e-07	AAAAGTCAACT	Prudul26A004526C1	IPR036291	NAD(P)-binding domain superfamily	Prudul26A007139C1	GO:0004523	Molecular Function:RNA-DNA hybrid ribonuclease activity	Prudul26A014396C1	K05955	protein farnesyltransferase/geranylgeranyltransferase type-1 subunit alpha [EC:2.5.1.58 2.5.1.59]
MA1298.1	Prudul26A005925C1	450	460	6.74e-07	AAAAGTCAACT	Prudul26A004726C1	IPR001650	Helicase, C-terminal	Prudul26A007139C1	GO:0003676	Molecular Function:nucleic acid binding	Prudul26A020658C1	K03517	quinolinate synthase [EC:2.5.1.72]
MA1298.1	Prudul26A027445C1	451	461	6.74e-07	AAAAGTCAACT	Prudul26A004726C1	IPR002464	DNA/RNA helicase, ATP-dependent, DEAH-box type, conserved site	Prudul26A007179C1	GO:0055114	Biological Process:oxidation-reduction process	Prudul26A020658C2	K03517	quinolinate synthase [EC:2.5.1.72]
MA1298.1	Prudul26A012203T4	458	468	6.74e-07	AAAAGTCAACT	Prudul26A004726C1	IPR007502	Helicase-associated domain	Prudul26A007179C1	GO:0005886	Cellular Component:plasma membrane	Prudul26A020658C3	K03517	quinolinate synthase [EC:2.5.1.72]
MA1298.1	Prudul26A026322C1	473	483	6.74e-07	AAAAGTCAACT	Prudul26A004726C1	IPR011709	Domain of unknown function DUF1605	Prudul26A007179C1	GO:0016655	Molecular Function:oxidoreductase activity, acting on NAD(P)H, quinone or similar compound as acceptor	Prudul26A020658C4	K03517	quinolinate synthase [EC:2.5.1.72]
MA1298.1	Prudul26A008113C1	487	497	6.74e-07	AAAAGTCAACT	Prudul26A004726C1	IPR014001	Helicase superfamily 1/2, ATP-binding domain	Prudul26A007345C1	GO:0016491	Molecular Function:oxidoreductase activity	Prudul26A018457C1	K00826	branched-chain amino acid aminotransferase [EC:2.6.1.42]
MA1298.1	Prudul26A001586C1	483	493	6.74e-07	AAAAGTCAACT	Prudul26A004726C1	IPR027417	P-loop containing nucleoside triphosphate hydrolase	Prudul26A007581C1	GO:0005515	Molecular Function:protein binding	Prudul26A012499C1	K04730	interleukin-1 receptor-associated kinase 1 [EC:2.7.11.1]
MA1298.1	Prudul26A000856C1	497	507	6.74e-07	AAAAGTCAACT	Prudul26A004886C1	IPR006935	Helicase/UvrB, N-terminal	Prudul26A007889C1	GO:0005515	Molecular Function:protein binding	Prudul26A011036C2	K13420	LRR receptor-like serine/threonine-protein kinase FLS2 [EC:2.7.11.1]
MA1298.1	Prudul26A001133C1	501	511	6.74e-07	AAAAGTCAACT	Prudul26A004886C1	IPR014001	Helicase superfamily 1/2, ATP-binding domain	Prudul26A008113C1	GO:0006508	Biological Process:proteolysis	Prudul26A011036C3	K13420	LRR receptor-like serine/threonine-protein kinase FLS2 [EC:2.7.11.1]
MA1298.1	Prudul26A025877C1	491	501	6.74e-07	AAAAGTCAACT	Prudul26A004886C1	IPR018999	RNA helicase UPF1, UPF2-interacting domain	Prudul26A008113C1	GO:0008237	Molecular Function:metallopeptidase activity	Prudul26A007139C1	K17535	serine/threonine-protein kinase TNNI3K [EC:2.7.11.1]
MA1298.1	Prudul26A014128C1	502	512	6.74e-07	AAAAGTCAACT	Prudul26A004886C1	IPR027417	P-loop containing nucleoside triphosphate hydrolase	Prudul26A008113C1	GO:0008270	Molecular Function:zinc ion binding	Prudul26A001058C1	K04420	mitogen-activated protein kinase kinase kinase 2 [EC:2.7.11.25]
MA1298.1	Prudul26A016644C1	518	528	6.74e-07	AAAAGTCAACT	Prudul26A004967C1	IPR000086	NUDIX hydrolase domain	Prudul26A008115C1	GO:0005515	Molecular Function:protein binding	Prudul26A032224C1	K14803	protein phosphatase PTC2/3 [EC:3.1.3.16]
MA1298.1	Prudul26A018347C1	519	529	6.74e-07	AAAAGTCAACT	Prudul26A004967C1	IPR015797	NUDIX hydrolase-like domain superfamily	Prudul26A008268C1	GO:0016747	Molecular Function:transferase activity, transferring acyl groups other than amino-acyl groups	Prudul26A008688C1	K01102	pyruvate dehydrogenase phosphatase [EC:3.1.3.43]
MA1298.1	Prudul26A018977C2	523	533	6.74e-07	AAAAGTCAACT	Prudul26A004967C1	IPR020084	NUDIX hydrolase, conserved site	Prudul26A008688C1	GO:0006470	Biological Process:protein dephosphorylation	Prudul26A008874C1	K01179	endoglucanase [EC:3.2.1.4]
MA1298.1	Prudul26A018977C1	523	533	6.74e-07	AAAAGTCAACT	Prudul26A004967C1	IPR020476	NUDIX hydrolase	Prudul26A008688C1	GO:0003824	Molecular Function:catalytic activity	Prudul26A009104C1	K01183	chitinase [EC:3.2.1.14]
MA1298.1	Prudul26A016146C1	527	537	6.74e-07	AAAAGTCAACT	Prudul26A004967C1	IPR022927	RNA pyrophosphohydrolase RppH	Prudul26A008688C1	GO:0043169	Molecular Function:cation binding	Prudul26A015223C1	K10801	methyl-CpG-binding domain protein 4 [EC:3.2.2.-]
MA1298.1	Prudul26A032571C1	536	546	6.74e-07	AAAAGTCAACT	Prudul26A005009C1	IPR019557	Aminotransferase-like, plant mobile domain	Prudul26A008688C1	GO:0004722	Molecular Function:protein serine/threonine phosphatase activity	Prudul26A015223C2	K10801	methyl-CpG-binding domain protein 4 [EC:3.2.2.-]
MA1298.1	Prudul26A014981C1	538	548	6.74e-07	AAAAGTCAACT	Prudul26A005113C1	IPR002213	UDP-glucuronosyl/UDP-glucosyltransferase	Prudul26A008874C1	GO:0005975	Biological Process:carbohydrate metabolic process	Prudul26A008113C1	K01254	leukotriene-A4 hydrolase [EC:3.3.2.6]
MA1298.1	Prudul26A025893C1	552	562	6.74e-07	AAAAGTCAACT	Prudul26A005113C1	IPR035595	UDP-glycosyltransferase family, conserved site	Prudul26A008874C1	GO:0003824	Molecular Function:catalytic activity	Prudul26A029799C1	K01285	lysosomal Pro-X carboxypeptidase [EC:3.4.16.2]
MA1298.1	Prudul26A002304C1	554	564	6.74e-07	AAAAGTCAACT	Prudul26A005141C1	IPR001943	UVR domain	Prudul26A008874C1	GO:0004553	Molecular Function:hydrolase activity, hydrolyzing O-glycosyl compounds	Prudul26A025217C1	K01381	saccharopepsin [EC:3.4.23.25]
MA1298.1	Prudul26A000635C1	556	566	6.74e-07	AAAAGTCAACT	Prudul26A005141C1	IPR007474	ApaG domain	Prudul26A008940C1	GO:0006468	Biological Process:protein phosphorylation	Prudul26A029373C1	K01402	matrix metalloproteinase-8 (neutrophil collagenase) [EC:3.4.24.34]
MA1298.1	Prudul26A021861C1	548	558	6.74e-07	AAAAGTCAACT	Prudul26A005141C1	IPR036767	ApaG domain superfamily	Prudul26A008940C1	GO:0005524	Molecular Function:ATP binding	Prudul26A007025C1	K13566	omega-amidase [EC:3.5.1.3]
MA1298.1	Prudul26A010664C1	565	575	6.74e-07	AAAAGTCAACT	Prudul26A005141C1	IPR036876	UVR domain superfamily	Prudul26A008940C1	GO:0005509	Molecular Function:calcium ion binding	Prudul26A007025C2	K13566	omega-amidase [EC:3.5.1.3]
MA1298.1	Prudul26A012454C1	575	585	6.74e-07	AAAAGTCAACT	Prudul26A005315C1	IPR002195	Dihydroorotase, conserved site	Prudul26A008940C1	GO:0030247	Molecular Function:polysaccharide binding	Prudul26A007025C3	K13566	omega-amidase [EC:3.5.1.3]
MA1298.1	Prudul26A001085C1	580	590	6.74e-07	AAAAGTCAACT	Prudul26A005315C1	IPR004721	Dihydroorotase homodimeric type	Prudul26A008940C1	GO:0004672	Molecular Function:protein kinase activity	Prudul26A007025C4	K13566	omega-amidase [EC:3.5.1.3]
MA1298.1	Prudul26A031205C1	606	616	6.74e-07	AAAAGTCAACT	Prudul26A005315C1	IPR006680	Amidohydrolase-related	Prudul26A009013C1	GO:0055114	Biological Process:oxidation-reduction process	Prudul26A005315C1	K01465	dihydroorotase [EC:3.5.2.3]
MA1298.1	Prudul26A011912C1	611	621	6.74e-07	AAAAGTCAACT	Prudul26A005315C1	IPR032466	Metal-dependent hydrolase	Prudul26A009013C1	GO:0016702	Molecular Function:oxidoreductase activity, acting on single donors with incorporation of molecular oxygen, incorporation of two atoms of oxygen	Prudul26A005315C2	K01465	dihydroorotase [EC:3.5.2.3]
MA1298.1	Prudul26A032096C1	614	624	6.74e-07	AAAAGTCAACT	Prudul26A005315C2	IPR002195	Dihydroorotase, conserved site	Prudul26A009037C1	GO:0007165	Biological Process:signal transduction	Prudul26A025824C1	K11643	chromodomain-helicase-DNA-binding protein 4 [EC:3.6.4.12]
MA1298.1	Prudul26A019442C2	618	628	6.74e-07	AAAAGTCAACT	Prudul26A005315C2	IPR004721	Dihydroorotase homodimeric type	Prudul26A009104C1	GO:0005975	Biological Process:carbohydrate metabolic process	Prudul26A004726C1	K13117	ATP-dependent RNA helicase DDX35 [EC:3.6.4.13]
MA1298.1	Prudul26A019442C1	618	628	6.74e-07	AAAAGTCAACT	Prudul26A005315C2	IPR006680	Amidohydrolase-related	Prudul26A009104C1	GO:0016998	Biological Process:cell wall macromolecule catabolic process	Prudul26A028796C1	K18655	ATP-dependent RNA helicase DDX19/DBP5 [EC:3.6.4.13]
MA1298.1	Prudul26A001680C1	625	635	6.74e-07	AAAAGTCAACT	Prudul26A005315C2	IPR032466	Metal-dependent hydrolase	Prudul26A009104C1	GO:0006032	Biological Process:chitin catabolic process	Prudul26A023810C1	K11654	SWI/SNF-related matrix-associated actin-dependent regulator of chromatin subfamily A member 5 [EC:3.6.4.-]
MA1298.1	Prudul26A008688C1	630	640	6.74e-07	AAAAGTCAACT	Prudul26A005329C1	IPR011011	Zinc finger, FYVE/PHD-type	Prudul26A009104C1	GO:0004568	Molecular Function:chitinase activity	Prudul26A004886C1	K14326	regulator of nonsense transcripts 1 [EC:3.6.4.-]
MA1298.1	Prudul26A012203C1	645	655	6.74e-07	AAAAGTCAACT	Prudul26A005329C1	IPR013083	Zinc finger, RING/FYVE/PHD-type	Prudul26A009326C1	GO:0006355	Biological Process:regulation of transcription, DNA-templated	Prudul26A026295C1	K01583	arginine decarboxylase [EC:4.1.1.19]
MA1298.1	Prudul26A012203C2	645	655	6.74e-07	AAAAGTCAACT	Prudul26A005329C1	IPR019786	Zinc finger, PHD-type, conserved site	Prudul26A009326C1	GO:0009725	Biological Process:response to hormone	Prudul26A010154C1	K01657	anthranilate synthase component I [EC:4.1.3.27]
MA1298.1	Prudul26A012203C3	645	655	6.74e-07	AAAAGTCAACT	Prudul26A005329C1	IPR019787	Zinc finger, PHD-finger	Prudul26A009326C1	GO:0005634	Cellular Component:nucleus	Prudul26A031827C1	K01802	peptidylprolyl isomerase [EC:5.2.1.8]
MA1298.1	Prudul26A013678C1	639	649	6.74e-07	AAAAGTCAACT	Prudul26A005329C1	IPR021998	Alfin	Prudul26A009326C1	GO:0003677	Molecular Function:DNA binding	Prudul26A031827C2	K01802	peptidylprolyl isomerase [EC:5.2.1.8]
MA1298.1	Prudul26A001629C1	651	661	6.74e-07	AAAAGTCAACT	Prudul26A005329C2	IPR011011	Zinc finger, FYVE/PHD-type	Prudul26A009326C1	GO:0003677	Molecular Function:DNA binding	Prudul26A001093C1	K01904	4-coumarate--CoA ligase [EC:6.2.1.12]
MA1298.1	Prudul26A003602C1	656	666	6.74e-07	AAAAGTCAACT	Prudul26A005329C2	IPR013083	Zinc finger, RING/FYVE/PHD-type	Prudul26A009326C1	GO:0005515	Molecular Function:protein binding	Prudul26A001058C1	K04420	mitogen-activated protein kinase kinase kinase 2 [EC:2.7.11.25]
MA1298.1	Prudul26A015304C1	663	673	6.74e-07	AAAAGTCAACT	Prudul26A005329C2	IPR019786	Zinc finger, PHD-type, conserved site	Prudul26A009495C1	GO:0055114	Biological Process:oxidation-reduction process	Prudul26A012499C1	K04730	interleukin-1 receptor-associated kinase 1 [EC:2.7.11.1]
MA1298.1	Prudul26A006600C1	663	673	6.74e-07	AAAAGTCAACT	Prudul26A005329C2	IPR019787	Zinc finger, PHD-finger	Prudul26A009495C1	GO:0009916	Molecular Function:alternative oxidase activity	Prudul26A011036C2	K13420	LRR receptor-like serine/threonine-protein kinase FLS2 [EC:2.7.11.1]
MA1298.1	Prudul26A004340C1	670	680	6.74e-07	AAAAGTCAACT	Prudul26A005329C2	IPR021998	Alfin	Prudul26A009495C2	GO:0055114	Biological Process:oxidation-reduction process	Prudul26A011036C3	K13420	LRR receptor-like serine/threonine-protein kinase FLS2 [EC:2.7.11.1]
MA1298.1	Prudul26A019420C1	683	693	6.74e-07	AAAAGTCAACT	Prudul26A005362C1	IPR001611	Leucine-rich repeat	Prudul26A009495C2	GO:0009916	Molecular Function:alternative oxidase activity	Prudul26A007139C1	K17535	serine/threonine-protein kinase TNNI3K [EC:2.7.11.1]
MA1298.1	Prudul26A025550C1	693	703	6.74e-07	AAAAGTCAACT	Prudul26A005362C1	IPR032675	Leucine-rich repeat domain superfamily	Prudul26A009506C1	GO:0005515	Molecular Function:protein binding	Prudul26A027445C1	K08869	aarF domain-containing kinase
MA1298.1	Prudul26A013359C1	686	696	6.74e-07	AAAAGTCAACT	Prudul26A005500C1	IPR011016	Zinc finger, RING-CH-type	Prudul26A010120C1	GO:0006812	Biological Process:cation transport	Prudul26A025217C1	K01381	saccharopepsin [EC:3.4.23.25]
MA1298.1	Prudul26A010745C1	697	707	6.74e-07	AAAAGTCAACT	Prudul26A005500C1	IPR013083	Zinc finger, RING/FYVE/PHD-type	Prudul26A010120C1	GO:0055085	Biological Process:transmembrane transport	Prudul26A008113C1	K01254	leukotriene-A4 hydrolase [EC:3.3.2.6]
MA1298.1	Prudul26A019768C1	704	714	6.74e-07	AAAAGTCAACT	Prudul26A005500C1	IPR033275	E3 ubiquitin-protein ligase MARCH-like	Prudul26A010120C1	GO:0016021	Cellular Component:integral component of membrane	Prudul26A029373C1	K01402	matrix metalloproteinase-8 (neutrophil collagenase) [EC:3.4.24.34]
MA1298.1	Prudul26A003314C2	738	748	6.74e-07	AAAAGTCAACT	Prudul26A005500C2	IPR011016	Zinc finger, RING-CH-type	Prudul26A010120C1	GO:0015299	Molecular Function:solute:proton antiporter activity	Prudul26A029799C1	K01285	lysosomal Pro-X carboxypeptidase [EC:3.4.16.2]
MA1298.1	Prudul26A001058C1	755	765	6.74e-07	AAAAGTCAACT	Prudul26A005500C2	IPR013083	Zinc finger, RING/FYVE/PHD-type	Prudul26A010550C1	GO:0005515	Molecular Function:protein binding	Prudul26A000859C1	K10256	omega-6 fatty acid desaturase / acyl-lipid omega-6 desaturase (Delta-12 desaturase) [EC:1.14.19.6 1.14.19.22]
MA1298.1	Prudul26A018475C1	762	772	6.74e-07	AAAAGTCAACT	Prudul26A005500C2	IPR033275	E3 ubiquitin-protein ligase MARCH-like	Prudul26A010711C1	GO:0005525	Molecular Function:GTP binding	Prudul26A018686C1	K10256	omega-6 fatty acid desaturase / acyl-lipid omega-6 desaturase (Delta-12 desaturase) [EC:1.14.19.6 1.14.19.22]
MA1298.1	Prudul26A024424C1	775	785	6.74e-07	AAAAGTCAACT	Prudul26A005614C1	IPR003340	B3 DNA binding domain	Prudul26A011036C2	GO:0006468	Biological Process:protein phosphorylation	Prudul26A014396C1	K05955	protein farnesyltransferase/geranylgeranyltransferase type-1 subunit alpha [EC:2.5.1.58 2.5.1.59]
MA1298.1	Prudul26A000888C1	769	779	6.74e-07	AAAAGTCAACT	Prudul26A005614C1	IPR015300	DNA-binding pseudobarrel domain superfamily	Prudul26A011036C2	GO:0005524	Molecular Function:ATP binding	Prudul26A018457C1	K00826	branched-chain amino acid aminotransferase [EC:2.6.1.42]
MA1298.1	Prudul26A003988C1	773	783	6.74e-07	AAAAGTCAACT	Prudul26A005862C1	IPR002048	EF-hand domain	Prudul26A011036C2	GO:0005524	Molecular Function:ATP binding	Prudul26A030605C1	K06268	serine/threonine-protein phosphatase 2B regulatory subunit
MA1298.1	Prudul26A022297C2	785	795	6.74e-07	AAAAGTCAACT	Prudul26A005862C1	IPR011992	EF-hand domain pair	Prudul26A011036C2	GO:0005515	Molecular Function:protein binding	Prudul26A030605C2	K06268	serine/threonine-protein phosphatase 2B regulatory subunit
MA1298.1	Prudul26A022297C1	785	795	6.74e-07	AAAAGTCAACT	Prudul26A005862C1	IPR018247	EF-Hand 1, calcium-binding site	Prudul26A011036C2	GO:0004672	Molecular Function:protein kinase activity	Prudul26A008688C1	K01102	pyruvate dehydrogenase phosphatase [EC:3.1.3.43]
MA1298.1	Prudul26A001502C1	789	799	6.74e-07	AAAAGTCAACT	Prudul26A005925C1	IPR002110	Ankyrin repeat	Prudul26A011036C3	GO:0006468	Biological Process:protein phosphorylation
MA1298.1	Prudul26A028724C2	790	800	6.74e-07	AAAAGTCAACT	Prudul26A005925C1	IPR013087	Zinc finger C2H2-type	Prudul26A011036C3	GO:0005524	Molecular Function:ATP binding
MA1298.1	Prudul26A005009C1	802	812	6.74e-07	AAAAGTCAACT	Prudul26A005925C1	IPR020683	Ankyrin repeat-containing domain	Prudul26A011036C3	GO:0005524	Molecular Function:ATP binding
MA1298.1	Prudul26A025255C1	835	845	6.74e-07	AAAAGTCAACT	Prudul26A005925C1	IPR036770	Ankyrin repeat-containing domain superfamily	Prudul26A011036C3	GO:0005515	Molecular Function:protein binding
MA1298.1	Prudul26A013005C1	843	853	6.74e-07	AAAAGTCAACT	Prudul26A005999C1	IPR012418	CAP160	Prudul26A011036C3	GO:0004672	Molecular Function:protein kinase activity
MA1298.1	Prudul26A013021C1	866	876	6.74e-07	AAAAGTCAACT	Prudul26A006018C1	IPR006786	Pinin/SDK/MemA protein	Prudul26A011297C1	GO:0006413	Biological Process:translational initiation
MA1298.1	Prudul26A028796C1	858	868	6.74e-07	AAAAGTCAACT	Prudul26A006018C1	IPR039853	Pinin	Prudul26A011297C1	GO:0005737	Cellular Component:cytoplasm
MA1298.1	Prudul26A012499C1	872	882	6.74e-07	AAAAGTCAACT	Prudul26A006300C1	IPR000719	Protein kinase domain	Prudul26A011297C1	GO:0003723	Molecular Function:RNA binding
MA1298.1	Prudul26A010236C1	895	905	6.74e-07	AAAAGTCAACT	Prudul26A006300C1	IPR001245	Serine-threonine/tyrosine-protein kinase, catalytic domain	Prudul26A011297C1	GO:0003743	Molecular Function:translation initiation factor activity
MA1298.1	Prudul26A017721C1	886	896	6.74e-07	AAAAGTCAACT	Prudul26A006300C1	IPR008271	Serine/threonine-protein kinase, active site	Prudul26A011498C1	GO:0007017	Biological Process:microtubule-based process
MA1298.1	Prudul26A029799C1	899	909	6.74e-07	AAAAGTCAACT	Prudul26A006300C1	IPR011009	Protein kinase-like domain superfamily	Prudul26A011498C1	GO:0005874	Cellular Component:microtubule
MA1298.1	Prudul26A008874C1	915	925	6.74e-07	AAAAGTCAACT	Prudul26A006300C1	IPR013210	Leucine-rich repeat-containing N-terminal, plant-type	Prudul26A011498C1	GO:0005525	Molecular Function:GTP binding
MA1298.1	Prudul26A028330C1	922	932	6.74e-07	AAAAGTCAACT	Prudul26A006300C1	IPR017441	Protein kinase, ATP binding site	Prudul26A011498C1	GO:0003924	Molecular Function:GTPase activity
MA1298.1	Prudul26A000031C1	926	936	6.74e-07	AAAAGTCAACT	Prudul26A006300C1	IPR032675	Leucine-rich repeat domain superfamily	Prudul26A011498C1	GO:0005200	Molecular Function:structural constituent of cytoskeleton
MA1298.1	Prudul26A017311C2	934	944	6.74e-07	AAAAGTCAACT	Prudul26A006354C1	IPR000477	Reverse transcriptase domain	Prudul26A011759C1	GO:0055114	Biological Process:oxidation-reduction process
MA1298.1	Prudul26A017311C1	934	944	6.74e-07	AAAAGTCAACT	Prudul26A006392C1	IPR015414	Transmembrane protein TMEM64	Prudul26A011759C1	GO:0016491	Molecular Function:oxidoreductase activity
MA1298.1	Prudul26A010120C1	946	956	6.74e-07	AAAAGTCAACT	Prudul26A006392C1	IPR032816	SNARE associated Golgi protein	Prudul26A011759C1	GO:0008270	Molecular Function:zinc ion binding
MA1298.1	Prudul26A026479C1	945	955	6.74e-07	AAAAGTCAACT	Prudul26A006619C1	IPR003690	Transcription termination factor, mitochondrial/chloroplastic	Prudul26A012203C1	GO:0003676	Molecular Function:nucleic acid binding
MA1298.1	Prudul26A026479C2	945	955	6.74e-07	AAAAGTCAACT	Prudul26A006619C1	IPR038538	MTERF superfamily, mitochondrial/chloroplastic	Prudul26A012203C2	GO:0003676	Molecular Function:nucleic acid binding
MA1298.1	Prudul26A025729C1	956	966	6.74e-07	AAAAGTCAACT	Prudul26A006619C2	IPR003690	Transcription termination factor, mitochondrial/chloroplastic	Prudul26A012203C3	GO:0003676	Molecular Function:nucleic acid binding
MA1298.1	Prudul26A006626C1	959	969	6.74e-07	AAAAGTCAACT	Prudul26A006619C2	IPR038538	MTERF superfamily, mitochondrial/chloroplastic	Prudul26A012203C4	GO:0003676	Molecular Function:nucleic acid binding
MA1298.1	Prudul26A020270C1	967	977	6.74e-07	AAAAGTCAACT	Prudul26A006626C1	IPR016024	Armadillo-type fold	Prudul26A012283C1	GO:0043531	Molecular Function:ADP binding
MA1298.1	Prudul26A020424C1	984	994	6.74e-07	AAAAGTCAACT	Prudul26A006626C1	IPR039786	Protein EFR3	Prudul26A012454C1	GO:0006351	Biological Process:transcription, DNA-templated
MA1298.1	Prudul26A001202C1	991	1001	6.74e-07	AAAAGTCAACT	Prudul26A006682C1	IPR006016	UspA	Prudul26A012454C1	GO:0005634	Cellular Component:nucleus
MA1298.1	Prudul26A015223C2	1022	1032	6.74e-07	AAAAGTCAACT	Prudul26A006682C1	IPR014729	Rossmann-like alpha/beta/alpha sandwich fold	Prudul26A012454C1	GO:0003677	Molecular Function:DNA binding
MA1298.1	Prudul26A015223C1	1022	1032	6.74e-07	AAAAGTCAACT	Prudul26A006696C1	IPR005746	Thioredoxin	Prudul26A012454C1	GO:0003899	Molecular Function:DNA-directed 5'-3' RNA polymerase activity
MA1298.1	Prudul26A005572C2	1023	1033	6.74e-07	AAAAGTCAACT	Prudul26A006696C1	IPR036249	Thioredoxin-like superfamily	Prudul26A012499C1	GO:0006468	Biological Process:protein phosphorylation
MA1298.1	Prudul26A008694C1	1065	1075	6.74e-07	AAAAGTCAACT	Prudul26A007025C1	IPR003010	Carbon-nitrogen hydrolase	Prudul26A012499C1	GO:0005524	Molecular Function:ATP binding
MA1298.1	Prudul26A007303C1	1065	1075	6.74e-07	AAAAGTCAACT	Prudul26A007025C1	IPR036526	Carbon-nitrogen hydrolase superfamily	Prudul26A012499C1	GO:0005524	Molecular Function:ATP binding
MA1298.1	Prudul26A009093C1	1069	1079	6.74e-07	AAAAGTCAACT	Prudul26A007025C2	IPR003010	Carbon-nitrogen hydrolase	Prudul26A012499C1	GO:0004672	Molecular Function:protein kinase activity
MA1298.1	Prudul26A018457C1	1073	1083	6.74e-07	AAAAGTCAACT	Prudul26A007025C2	IPR036526	Carbon-nitrogen hydrolase superfamily	Prudul26A013005C1	GO:0006863	Biological Process:purine nucleobase transport
MA1298.1	Prudul26A011036C3	1074	1084	6.74e-07	AAAAGTCAACT	Prudul26A007025C3	IPR003010	Carbon-nitrogen hydrolase	Prudul26A013005C1	GO:0055085	Biological Process:transmembrane transport
MA1298.1	Prudul26A011036C2	1074	1084	6.74e-07	AAAAGTCAACT	Prudul26A007025C3	IPR036526	Carbon-nitrogen hydrolase superfamily	Prudul26A013005C1	GO:0016020	Cellular Component:membrane
MA1298.1	Prudul26A028724C1	1080	1090	6.74e-07	AAAAGTCAACT	Prudul26A007025C4	IPR003010	Carbon-nitrogen hydrolase	Prudul26A013005C1	GO:0005345	Molecular Function:purine nucleobase transmembrane transporter activity
MA1298.1	Prudul26A022607C1	1081	1091	6.74e-07	AAAAGTCAACT	Prudul26A007025C4	IPR036526	Carbon-nitrogen hydrolase superfamily	Prudul26A013005C1	GO:0022857	Molecular Function:transmembrane transporter activity
MA1298.1	Prudul26A015501C1	1077	1087	6.74e-07	AAAAGTCAACT	Prudul26A007139C1	IPR002156	Ribonuclease H domain	Prudul26A013021C1	GO:0043531	Molecular Function:ADP binding
MA1298.1	Prudul26A019838C1	1092	1102	6.74e-07	AAAAGTCAACT	Prudul26A007179C1	IPR020905	NAD(P)H-quinone oxidoreductase subunit O	Prudul26A013135C1	GO:0008283	Biological Process:cell proliferation
MA1298.1	Prudul26A027802C2	1094	1104	6.74e-07	AAAAGTCAACT	Prudul26A007345C1	IPR002347	Short-chain dehydrogenase/reductase SDR	Prudul26A013135C1	GO:0005576	Cellular Component:extracellular region
MA1298.1	Prudul26A009701C1	1110	1120	6.74e-07	AAAAGTCAACT	Prudul26A007345C1	IPR020904	Short-chain dehydrogenase/reductase, conserved site	Prudul26A013135C1	GO:0008083	Molecular Function:growth factor activity
MA1298.1	Prudul26A023781C1	1151	1161	6.74e-07	AAAAGTCAACT	Prudul26A007345C1	IPR036291	NAD(P)-binding domain superfamily	Prudul26A013396C1	GO:0043531	Molecular Function:ADP binding
MA1298.1	Prudul26A031096C1	1156	1166	6.74e-07	AAAAGTCAACT	Prudul26A007581C1	IPR001611	Leucine-rich repeat	Prudul26A013551C2	GO:0005515	Molecular Function:protein binding
MA1298.1	Prudul26A013135C1	1158	1168	6.74e-07	AAAAGTCAACT	Prudul26A007581C1	IPR032675	Leucine-rich repeat domain superfamily	Prudul26A013560C2	GO:0005515	Molecular Function:protein binding
MA1298.1	Prudul26A011253C1	1170	1180	6.74e-07	AAAAGTCAACT	Prudul26A007889C1	IPR002885	Pentatricopeptide repeat	Prudul26A013560C3	GO:0005515	Molecular Function:protein binding
MA1298.1	Prudul26A011253C2	1170	1180	6.74e-07	AAAAGTCAACT	Prudul26A007889C1	IPR011990	Tetratricopeptide-like helical domain superfamily	Prudul26A013623C1	GO:0055114	Biological Process:oxidation-reduction process
MA1298.1	Prudul26A005572C1	1171	1181	6.74e-07	AAAAGTCAACT	Prudul26A008113C1	IPR001930	Peptidase M1, alanine aminopeptidase/leukotriene A4 hydrolase	Prudul26A013623C1	GO:0016491	Molecular Function:oxidoreductase activity
MA1298.1	Prudul26A024083C1	1176	1186	6.74e-07	AAAAGTCAACT	Prudul26A008113C1	IPR014782	Peptidase M1, membrane alanine aminopeptidase, N-terminal	Prudul26A013787C1	GO:0003677	Molecular Function:DNA binding
MA1298.1	Prudul26A030605C2	1177	1187	6.74e-07	AAAAGTCAACT	Prudul26A008113C1	IPR015211	Peptidase M1, leukotriene A4 hydrolase/aminopeptidase C-terminal	Prudul26A014032C1	GO:0005515	Molecular Function:protein binding
MA1298.1	Prudul26A002153C1	1189	1199	6.74e-07	AAAAGTCAACT	Prudul26A008113C1	IPR016024	Armadillo-type fold	Prudul26A014044C1	GO:0006355	Biological Process:regulation of transcription, DNA-templated
MA1298.1	Prudul26A027564C1	1207	1217	6.74e-07	AAAAGTCAACT	Prudul26A008113C1	IPR027268	Peptidase M4/M1, CTD superfamily	Prudul26A014044C1	GO:0003700	Molecular Function:DNA-binding transcription factor activity
MA1298.1	Prudul26A013787C1	1220	1230	6.74e-07	AAAAGTCAACT	Prudul26A008113C1	IPR038502	Peptidase M1 LTA-4 hydrolase/aminopeptidase, C-terminal domain superfamily	Prudul26A014564C1	GO:0009642	Biological Process:response to light intensity
MA1298.1	Prudul26A014044C1	1239	1249	6.74e-07	AAAAGTCAACT	Prudul26A008115C1	IPR001680	WD40 repeat	Prudul26A014980C1	GO:0055114	Biological Process:oxidation-reduction process
MA1298.1	Prudul26A009326C1	1231	1241	6.74e-07	AAAAGTCAACT	Prudul26A008115C1	IPR015943	WD40/YVTN repeat-like-containing domain superfamily	Prudul26A014980C1	GO:0020037	Molecular Function:heme binding
MA1298.1	Prudul26A033071C1	1241	1251	6.74e-07	AAAAGTCAACT	Prudul26A008115C1	IPR017986	WD40-repeat-containing domain	Prudul26A014980C1	GO:0005506	Molecular Function:iron ion binding
MA1298.1	Prudul26A005999C1	1249	1259	6.74e-07	AAAAGTCAACT	Prudul26A008115C1	IPR019775	WD40 repeat, conserved site	Prudul26A014980C1	GO:0016705	Molecular Function:oxidoreductase activity, acting on paired donors, with incorporation or reduction of molecular oxygen
MA1298.1	Prudul26A014980C2	1253	1263	6.74e-07	AAAAGTCAACT	Prudul26A008115C1	IPR020472	G-protein beta WD-40 repeat	Prudul26A014980C2	GO:0055114	Biological Process:oxidation-reduction process
MA1298.1	Prudul26A014980C1	1253	1263	6.74e-07	AAAAGTCAACT	Prudul26A008115C1	IPR036322	WD40-repeat-containing domain superfamily	Prudul26A014980C2	GO:0020037	Molecular Function:heme binding
MA1298.1	Prudul26A023810C1	1265	1275	6.74e-07	AAAAGTCAACT	Prudul26A008268C1	IPR003480	Transferase	Prudul26A014980C2	GO:0005506	Molecular Function:iron ion binding
MA1298.1	Prudul26A004726C1	1271	1281	6.74e-07	AAAAGTCAACT	Prudul26A008268C1	IPR023213	Chloramphenicol acetyltransferase-like domain superfamily	Prudul26A014980C2	GO:0016705	Molecular Function:oxidoreductase activity, acting on paired donors, with incorporation or reduction of molecular oxygen
MA1298.1	Prudul26A019116C2	1277	1287	6.74e-07	AAAAGTCAACT	Prudul26A008438C1	IPR005607	BSD domain	Prudul26A015186C1	GO:0055114	Biological Process:oxidation-reduction process
MA1298.1	Prudul26A004886C1	1286	1296	6.74e-07	AAAAGTCAACT	Prudul26A008438C1	IPR035925	BSD domain superfamily	Prudul26A015186C1	GO:0020037	Molecular Function:heme binding
MA1298.1	Prudul26A030625C1	1314	1324	6.74e-07	AAAAGTCAACT	Prudul26A008489C1	IPR025322	Protein of unknown function DUF4228, plant	Prudul26A015186C1	GO:0005506	Molecular Function:iron ion binding
MA1298.1	Prudul26A003031C1	1320	1330	6.74e-07	AAAAGTCAACT	Prudul26A008688C1	IPR000222	PPM-type phosphatase, divalent cation binding	Prudul26A015186C1	GO:0016705	Molecular Function:oxidoreductase activity, acting on paired donors, with incorporation or reduction of molecular oxygen
MA1298.1	Prudul26A006018C1	1329	1339	6.74e-07	AAAAGTCAACT	Prudul26A008688C1	IPR001932	PPM-type phosphatase domain	Prudul26A015223C1	GO:0006281	Biological Process:DNA repair
MA1298.1	Prudul26A019116C1	1330	1340	6.74e-07	AAAAGTCAACT	Prudul26A008688C1	IPR015655	Protein phosphatase 2C family	Prudul26A015223C1	GO:0003824	Molecular Function:catalytic activity
MA1298.1	Prudul26A011140C1	1342	1352	6.74e-07	AAAAGTCAACT	Prudul26A008688C1	IPR036457	PPM-type phosphatase domain superfamily	Prudul26A015223C2	GO:0006281	Biological Process:DNA repair
MA1298.1	Prudul26A021739C1	1356	1366	6.74e-07	AAAAGTCAACT	Prudul26A008874C1	IPR001701	Glycoside hydrolase family 9	Prudul26A015223C2	GO:0003824	Molecular Function:catalytic activity
MA1298.1	Prudul26A016592C1	1347	1357	6.74e-07	AAAAGTCAACT	Prudul26A008874C1	IPR008928	Six-hairpin glycosidase superfamily	Prudul26A015974C1	GO:0007165	Biological Process:signal transduction
MA1298.1	Prudul26A032604C1	1358	1368	6.74e-07	AAAAGTCAACT	Prudul26A008874C1	IPR012341	Six-hairpin glycosidase-like superfamily	Prudul26A015974C1	GO:0043531	Molecular Function:ADP binding
MA1298.1	Prudul26A030605C1	1385	1395	6.74e-07	AAAAGTCAACT	Prudul26A008874C1	IPR018221	Glycoside hydrolase family 9, His active site	Prudul26A015974C1	GO:0005515	Molecular Function:protein binding
MA1298.1	Prudul26A017104C1	1400	1410	6.74e-07	AAAAGTCAACT	Prudul26A008940C1	IPR000719	Protein kinase domain	Prudul26A016146C1	GO:0005634	Cellular Component:nucleus
MA1298.1	Prudul26A012190C1	1413	1423	6.74e-07	AAAAGTCAACT	Prudul26A008940C1	IPR008271	Serine/threonine-protein kinase, active site	Prudul26A016146C1	GO:0003677	Molecular Function:DNA binding
MA1298.1	Prudul26A013253C1	1416	1426	6.74e-07	AAAAGTCAACT	Prudul26A008940C1	IPR011009	Protein kinase-like domain superfamily	Prudul26A016146C1	GO:0003677	Molecular Function:DNA binding
MA1298.1	Prudul26A000005C1	1408	1418	6.74e-07	AAAAGTCAACT	Prudul26A008940C1	IPR018097	EGF-like calcium-binding, conserved site	Prudul26A016154C1	GO:0007165	Biological Process:signal transduction
MA1298.1	Prudul26A008438C1	1409	1419	6.74e-07	AAAAGTCAACT	Prudul26A008940C1	IPR025287	Wall-associated receptor kinase, galacturonan-binding domain	Prudul26A016154C1	GO:0043531	Molecular Function:ADP binding
MA1298.1	Prudul26A020658T4	1412	1422	6.74e-07	AAAAGTCAACT	Prudul26A009013C1	IPR011051	RmlC-like cupin domain superfamily	Prudul26A016154C1	GO:0005515	Molecular Function:protein binding
MA1298.1	Prudul26A031827C1	1441	1451	6.74e-07	AAAAGTCAACT	Prudul26A009013C1	IPR012864	Cysteine oxygenase/2-aminoethanethiol dioxygenase	Prudul26A016592C1	GO:0016020	Cellular Component:membrane
MA1298.1	Prudul26A031827C2	1441	1451	6.74e-07	AAAAGTCAACT	Prudul26A009037C1	IPR012463	Ethylene-responsive binding factor-associated repression	Prudul26A016592C1	GO:0004970	Molecular Function:ionotropic glutamate receptor activity
MA1298.1	Prudul26A018889C1	1446	1456	6.74e-07	AAAAGTCAACT	Prudul26A009037C1	IPR031307	Ninja family	Prudul26A016644C1	GO:0006526	Biological Process:arginine biosynthetic process
MA1298.1	Prudul26A010711C1	1450	1460	6.74e-07	AAAAGTCAACT	Prudul26A009037C1	IPR032308	Jas TPL-binding domain	Prudul26A016644C1	GO:0055114	Biological Process:oxidation-reduction process
MA1298.1	Prudul26A012139C1	1464	1474	6.74e-07	AAAAGTCAACT	Prudul26A009037C1	IPR032310	Putative nuclear localisation signal	Prudul26A016644C1	GO:0004358	Molecular Function:glutamate N-acetyltransferase activity
MA1298.1	Prudul26A016724C1	1468	1478	6.74e-07	AAAAGTCAACT	Prudul26A009104C1	IPR000726	Glycoside hydrolase, family 19, catalytic	Prudul26A016644C1	GO:0020037	Molecular Function:heme binding
MA1298.1	Prudul26A029373C1	1472	1482	6.74e-07	AAAAGTCAACT	Prudul26A009104C1	IPR016283	Glycoside hydrolase, family 19	Prudul26A016644C1	GO:0005506	Molecular Function:iron ion binding
MA1298.1	Prudul26A012252C1	1488	1498	6.74e-07	AAAAGTCAACT	Prudul26A009104C1	IPR023346	Lysozyme-like domain superfamily	Prudul26A016644C1	GO:0016705	Molecular Function:oxidoreductase activity, acting on paired donors, with incorporation or reduction of molecular oxygen
MA1298.1	Prudul26A000357C1	1502	1512	6.74e-07	AAAAGTCAACT	Prudul26A009326C1	IPR000270	PB1 domain	Prudul26A016724C1	GO:0016787	Molecular Function:hydrolase activity
MA1298.1	Prudul26A022153C1	1525	1535	6.74e-07	AAAAGTCAACT	Prudul26A009326C1	IPR003340	B3 DNA binding domain	Prudul26A016766C1	GO:0006508	Biological Process:proteolysis
MA1298.1	Prudul26A005315C1	1542	1552	6.74e-07	AAAAGTCAACT	Prudul26A009326C1	IPR010525	Auxin response factor	Prudul26A016766C1	GO:0004190	Molecular Function:aspartic-type endopeptidase activity
MA1298.1	Prudul26A005315C2	1542	1552	6.74e-07	AAAAGTCAACT	Prudul26A009326C1	IPR015300	DNA-binding pseudobarrel domain superfamily	Prudul26A016986C1	GO:0016567	Biological Process:protein ubiquitination
MA1298.1	Prudul26A020348C1	1546	1556	6.74e-07	AAAAGTCAACT	Prudul26A009495C1	IPR002680	Alternative oxidase	Prudul26A016986C1	GO:0004523	Molecular Function:RNA-DNA hybrid ribonuclease activity
MA1298.1	Prudul26A028186C1	1586	1596	6.74e-07	AAAAGTCAACT	Prudul26A009495C1	IPR038659	Alternative oxidase superfamily	Prudul26A016986C1	GO:0003676	Molecular Function:nucleic acid binding
MA1298.1	Prudul26A006619C2	1601	1611	6.74e-07	AAAAGTCAACT	Prudul26A009495C2	IPR002680	Alternative oxidase	Prudul26A016986C1	GO:0003676	Molecular Function:nucleic acid binding
MA1298.1	Prudul26A006619C1	1601	1611	6.74e-07	AAAAGTCAACT	Prudul26A009495C2	IPR038659	Alternative oxidase superfamily	Prudul26A016986C1	GO:0004842	Molecular Function:ubiquitin-protein transferase activity
MA1298.1	Prudul26A002746C1	1610	1620	6.74e-07	AAAAGTCAACT	Prudul26A009506C1	IPR002885	Pentatricopeptide repeat	Prudul26A016986C2	GO:0016567	Biological Process:protein ubiquitination
MA1298.1	Prudul26A027455C1	1615	1625	6.74e-07	AAAAGTCAACT	Prudul26A009506C1	IPR011990	Tetratricopeptide-like helical domain superfamily	Prudul26A016986C2	GO:0004523	Molecular Function:RNA-DNA hybrid ribonuclease activity
MA1298.1	Prudul26A009939C1	1619	1629	6.74e-07	AAAAGTCAACT	Prudul26A009693C1	IPR020683	Ankyrin repeat-containing domain	Prudul26A016986C2	GO:0003676	Molecular Function:nucleic acid binding
MA1298.1	Prudul26A026036C1	1634	1644	6.74e-07	AAAAGTCAACT	Prudul26A009693C1	IPR036770	Ankyrin repeat-containing domain superfamily	Prudul26A016986C2	GO:0003676	Molecular Function:nucleic acid binding
MA1298.1	Prudul26A005862C1	1638	1648	6.74e-07	AAAAGTCAACT	Prudul26A010120C1	IPR006153	Cation/H+ exchanger	Prudul26A016986C2	GO:0004842	Molecular Function:ubiquitin-protein transferase activity
MA1298.1	Prudul26A006682C1	1636	1646	6.74e-07	AAAAGTCAACT	Prudul26A010120C1	IPR038770	Sodium/solute symporter superfamily	Prudul26A017311C1	GO:0005515	Molecular Function:protein binding
MA1298.1	Prudul26A014961C1	1646	1656	6.74e-07	AAAAGTCAACT	Prudul26A010154C1	IPR001849	Pleckstrin homology domain	Prudul26A017311C2	GO:0005515	Molecular Function:protein binding
MA1298.1	Prudul26A020658C2	1650	1660	6.74e-07	AAAAGTCAACT	Prudul26A010154C1	IPR011993	PH-like domain superfamily	Prudul26A017721C1	GO:0005515	Molecular Function:protein binding
MA1298.1	Prudul26A020658C1	1650	1660	6.74e-07	AAAAGTCAACT	Prudul26A010154C2	IPR001849	Pleckstrin homology domain	Prudul26A017792C1	GO:0006351	Biological Process:transcription, DNA-templated
MA1298.1	Prudul26A020658C3	1650	1660	6.74e-07	AAAAGTCAACT	Prudul26A010154C2	IPR011993	PH-like domain superfamily	Prudul26A017792C1	GO:0003899	Molecular Function:DNA-directed 5'-3' RNA polymerase activity
MA1298.1	Prudul26A008489C1	1658	1668	6.74e-07	AAAAGTCAACT	Prudul26A010236C1	IPR006460	Protein MIZU-KUSSEI 1-like, plant	Prudul26A018130C1	GO:0055085	Biological Process:transmembrane transport
MA1298.1	Prudul26A013623C1	1671	1681	6.74e-07	AAAAGTCAACT	Prudul26A010550C1	IPR001611	Leucine-rich repeat	Prudul26A018130C1	GO:0016020	Cellular Component:membrane
MA1298.1	Prudul26A005614C1	1684	1694	6.74e-07	AAAAGTCAACT	Prudul26A010550C1	IPR013101	Leucine-rich repeat 2	Prudul26A018130C1	GO:0022857	Molecular Function:transmembrane transporter activity
MA1298.1	Prudul26A004250C1	1695	1705	6.74e-07	AAAAGTCAACT	Prudul26A010550C1	IPR013210	Leucine-rich repeat-containing N-terminal, plant-type	Prudul26A018457C1	GO:0009081	Biological Process:branched-chain amino acid metabolic process
MA1298.1	Prudul26A011498C1	1710	1720	6.74e-07	AAAAGTCAACT	Prudul26A010550C1	IPR032675	Leucine-rich repeat domain superfamily	Prudul26A018457C1	GO:0004084	Molecular Function:branched-chain-amino-acid transaminase activity
MA1298.1	Prudul26A032224C1	1729	1739	6.74e-07	AAAAGTCAACT	Prudul26A010664C1	IPR004926	Late embryogenesis abundant protein, LEA_3 subgroup	Prudul26A018457C1	GO:0003824	Molecular Function:catalytic activity
MA1298.1	Prudul26A007345C1	1745	1755	6.74e-07	AAAAGTCAACT	Prudul26A010711C1	IPR005225	Small GTP-binding protein domain	Prudul26A018475C1	GO:0003677	Molecular Function:DNA binding
MA1298.1	Prudul26A012283C1	1749	1759	6.74e-07	AAAAGTCAACT	Prudul26A010711C1	IPR006689	Small GTPase superfamily, ARF/SAR type	Prudul26A018686C1	GO:0006629	Biological Process:lipid metabolic process
MA1298.1	Prudul26A031858C1	1769	1779	6.74e-07	AAAAGTCAACT	Prudul26A010711C1	IPR027417	P-loop containing nucleoside triphosphate hydrolase	Prudul26A018889C1	GO:0046537	Molecular Function:2,3-bisphosphoglycerate-independent phosphoglycerate mutase activity
MA1298.1	Prudul26A030267C1	1776	1786	6.74e-07	AAAAGTCAACT	Prudul26A011036C2	IPR000719	Protein kinase domain	Prudul26A018889C1	GO:0003824	Molecular Function:catalytic activity
MA1298.1	Prudul26A016376C1	1776	1786	6.74e-07	AAAAGTCAACT	Prudul26A011036C2	IPR001611	Leucine-rich repeat	Prudul26A018889C1	GO:0003824	Molecular Function:catalytic activity
MA1298.1	Prudul26A020425C1	1788	1798	6.74e-07	AAAAGTCAACT	Prudul26A011036C2	IPR008271	Serine/threonine-protein kinase, active site	Prudul26A018889C1	GO:0046872	Molecular Function:metal ion binding
MA1298.1	Prudul26A007025C1	1791	1801	6.74e-07	AAAAGTCAACT	Prudul26A011036C2	IPR011009	Protein kinase-like domain superfamily	Prudul26A019116C1	GO:0005515	Molecular Function:protein binding
MA1298.1	Prudul26A007025C3	1792	1802	6.74e-07	AAAAGTCAACT	Prudul26A011036C2	IPR013210	Leucine-rich repeat-containing N-terminal, plant-type	Prudul26A019116C2	GO:0005515	Molecular Function:protein binding
MA1298.1	Prudul26A007025C2	1792	1802	6.74e-07	AAAAGTCAACT	Prudul26A011036C2	IPR017441	Protein kinase, ATP binding site	Prudul26A019176C1	GO:0016758	Molecular Function:transferase activity, transferring hexosyl groups
MA1298.1	Prudul26A007025T4	1792	1802	6.74e-07	AAAAGTCAACT	Prudul26A011036C2	IPR032675	Leucine-rich repeat domain superfamily	Prudul26A019219C1	GO:0030488	Biological Process:tRNA methylation
MA1298.1	Prudul26A031685C1	1809	1819	6.74e-07	AAAAGTCAACT	Prudul26A011036C3	IPR000719	Protein kinase domain	Prudul26A019219C1	GO:0031515	Cellular Component:tRNA (m1A) methyltransferase complex
MA1298.1	Prudul26A011759C1	1814	1824	6.74e-07	AAAAGTCAACT	Prudul26A011036C3	IPR001611	Leucine-rich repeat	Prudul26A019420C1	GO:0006468	Biological Process:protein phosphorylation
MA1298.1	Prudul26A016154C1	1810	1820	6.74e-07	AAAAGTCAACT	Prudul26A011036C3	IPR008271	Serine/threonine-protein kinase, active site	Prudul26A019420C1	GO:0005524	Molecular Function:ATP binding
MA1298.1	Prudul26A023364C1	1831	1841	6.74e-07	AAAAGTCAACT	Prudul26A011036C3	IPR011009	Protein kinase-like domain superfamily	Prudul26A019420C1	GO:0005524	Molecular Function:ATP binding
MA1298.1	Prudul26A009104C1	1851	1861	6.74e-07	AAAAGTCAACT	Prudul26A011036C3	IPR017441	Protein kinase, ATP binding site	Prudul26A019420C1	GO:0005515	Molecular Function:protein binding
MA1298.1	Prudul26A010154C2	1851	1861	6.74e-07	AAAAGTCAACT	Prudul26A011036C3	IPR032675	Leucine-rich repeat domain superfamily	Prudul26A019420C1	GO:0004672	Molecular Function:protein kinase activity
MA1298.1	Prudul26A010154C1	1851	1861	6.74e-07	AAAAGTCAACT	Prudul26A011140C1	IPR032308	Jas TPL-binding domain	Prudul26A019442C1	GO:0003677	Molecular Function:DNA binding
MA1298.1	Prudul26A025411C1	1864	1874	6.74e-07	AAAAGTCAACT	Prudul26A011253C1	IPR005135	Endonuclease/exonuclease/phosphatase	Prudul26A019442C1	GO:0008270	Molecular Function:zinc ion binding
MA1298.1	Prudul26A025411C2	1864	1874	6.74e-07	AAAAGTCAACT	Prudul26A011253C1	IPR036691	Endonuclease/exonuclease/phosphatase superfamily	Prudul26A019442C2	GO:0003677	Molecular Function:DNA binding
MA1298.1	Prudul26A006354C1	1878	1888	6.74e-07	AAAAGTCAACT	Prudul26A011253C2	IPR005135	Endonuclease/exonuclease/phosphatase	Prudul26A019442C2	GO:0008270	Molecular Function:zinc ion binding
MA1298.1	Prudul26A022235C1	1887	1897	6.74e-07	AAAAGTCAACT	Prudul26A011253C2	IPR036691	Endonuclease/exonuclease/phosphatase superfamily
MA1298.1	Prudul26A026103C1	1891	1901	6.74e-07	AAAAGTCAACT	Prudul26A011297C1	IPR001040	Translation Initiation factor eIF- 4e
MA1298.1	Prudul26A008115C1	1881	1891	6.74e-07	AAAAGTCAACT	Prudul26A011297C1	IPR019770	Eukaryotic translation initiation factor 4E (eIF-4E), conserved site
MA1298.1	Prudul26A000322C1	1888	1898	6.74e-07	AAAAGTCAACT	Prudul26A011297C1	IPR023398	Translation Initiation factor eIF- 4e-like
MA1298.1	Prudul26A029558C1	1934	1944	6.74e-07	AAAAGTCAACT	Prudul26A011498C1	IPR000217	Tubulin
MA1298.1	Prudul26A031834C2	1934	1944	6.74e-07	AAAAGTCAACT	Prudul26A011498C1	IPR002452	Alpha tubulin
MA1298.1	Prudul26A031834C1	1934	1944	6.74e-07	AAAAGTCAACT	Prudul26A011498C1	IPR003008	Tubulin/FtsZ, GTPase domain
MA1298.1	Prudul26A025207C1	1985	1995	6.74e-07	AAAAGTCAACT	Prudul26A011498C1	IPR008280	Tubulin/FtsZ, C-terminal
MA1298.1	Prudul26A020482C1	8	18	9.23e-07	CAAAGTCAACG	Prudul26A011498C1	IPR013838	Beta tubulin, autoregulation binding site
MA1298.1	Prudul26A006696C1	19	29	9.23e-07	CAAAGTCAACG	Prudul26A011498C1	IPR017975	Tubulin, conserved site
MA1298.1	Prudul26A002953C1	43	53	9.23e-07	CAAAGTCAACG	Prudul26A011498C1	IPR018316	Tubulin/FtsZ, 2-layer sandwich domain
MA1298.1	Prudul26A009013C1	123	133	9.23e-07	CAAAGTCAACG	Prudul26A011498C1	IPR023123	Tubulin, C-terminal
MA1298.1	Prudul26A005500C2	230	240	9.23e-07	CAAAGTCAACG	Prudul26A011498C1	IPR036525	Tubulin/FtsZ, GTPase domain superfamily
MA1298.1	Prudul26A029913C1	254	264	9.23e-07	CAAAGTCAACG	Prudul26A011498C1	IPR037103	Tubulin/FtsZ, C-terminal domain superfamily
MA1298.1	Prudul26A014032C1	371	381	9.23e-07	CAAAGTCAACG	Prudul26A011759C1	IPR002328	Alcohol dehydrogenase, zinc-type, conserved site
MA1298.1	Prudul26A001119C1	396	406	9.23e-07	CAAAGTCAACG	Prudul26A011759C1	IPR011032	GroES-like superfamily
MA1298.1	Prudul26A030015C1	441	451	9.23e-07	CAAAGTCAACG	Prudul26A011759C1	IPR013149	Alcohol dehydrogenase, C-terminal
MA1298.1	Prudul26A014189C1	502	512	9.23e-07	CAAAGTCAACG	Prudul26A011759C1	IPR013154	Alcohol dehydrogenase, N-terminal
MA1298.1	Prudul26A022501C1	597	607	9.23e-07	CAAAGTCAACG	Prudul26A011759C1	IPR036291	NAD(P)-binding domain superfamily
MA1298.1	Prudul26A029536C1	686	696	9.23e-07	CAAAGTCAACG	Prudul26A011912C1	IPR000608	Ubiquitin-conjugating enzyme E2
MA1298.1	Prudul26A000730C1	698	708	9.23e-07	CAAAGTCAACG	Prudul26A011912C1	IPR016135	Ubiquitin-conjugating enzyme/RWD-like
MA1298.1	Prudul26A023364C1	733	743	9.23e-07	CAAAGTCAACG
MA1298.1	Prudul26A031438C1	745	755	9.23e-07	CAAAGTCAACG
MA1298.1	Prudul26A005500C1	740	750	9.23e-07	CAAAGTCAACG
MA1298.1	Prudul26A023023C1	790	800	9.23e-07	CAAAGTCAACG
MA1298.1	Prudul26A012898C1	803	813	9.23e-07	CAAAGTCAACG
MA1298.1	Prudul26A000265C2	1241	1251	9.23e-07	CAAAGTCAACG
MA1298.1	Prudul26A000265C1	1241	1251	9.23e-07	CAAAGTCAACG
MA1298.1	Prudul26A025294C1	1282	1292	9.23e-07	CAAAGTCAACG
MA1298.1	Prudul26A013396C1	1288	1298	9.23e-07	CAAAGTCAACG
MA1298.1	Prudul26A031483C1	1370	1380	9.23e-07	CAAAGTCAACG
MA1298.1	Prudul26A025439C1	1516	1526	9.23e-07	CAAAGTCAACG
MA1298.1	Prudul26A015595C1	1563	1573	9.23e-07	CAAAGTCAACG
MA1298.1	Prudul26A015186C1	1658	1668	9.23e-07	CAAAGTCAACG
MA1298.1	Prudul26A004526C1	1801	1811	9.23e-07	CAAAGTCAACG
MA1298.1	Prudul26A005329C1	1796	1806	9.23e-07	CAAAGTCAACG
MA1298.1	Prudul26A005329C2	1796	1806	9.23e-07	CAAAGTCAACG
MA1298.1	Prudul26A014564C1	1803	1813	9.23e-07	CAAAGTCAACG
MA1298.1	Prudul26A031499C1	1986	1996	9.23e-07	CAAAGTCAACG
